# Supplementary material
Source: publisher figshare collection journal article supplement (https://acs.figshare.com/ndownloader/files/25400378)

## *Supporting Information*

### **Directed Palladium(II)-Catalyzed Intermolecular Anti-Markovnikov Hydroarylation of Unactivated Alkenes with (Hetero)arylsilanes**

Ming-Zhu Lu,<sup>\*,†</sup> Haiqing Luo,<sup>‡</sup> Zhengsong Hu,<sup>†</sup> Changdong Shao,<sup>†</sup> Yuhe Kan,<sup>†</sup> and  
Teck-Peng Loh<sup>\*,§</sup>

<sup>†</sup>Jiangsu Key Laboratory for Chemistry of Low-Dimensional Materials, School of Chemistry and  
Chemical Engineering, Huaiyin Normal University, Huaian 223300, P. R. China

<sup>‡</sup>Department of Chemistry & Chemical Engineering, Gannan Normal University, Ganzhou 341000,  
P. R. China

<sup>§</sup>Division of Chemistry and Biological Chemistry, School of Physical and Mathematical Sciences,  
Nanyang Technological University, Singapore 637371

\*E-mail: mzlu@hytc.edu.cn; teckpeng@ntu.edu.sg

| <b>Table of Contents</b>                                      | <b>Page No.</b> |
|---------------------------------------------------------------|-----------------|
| 1. General Information                                        | S-1             |
| 2. Optimization of Reaction Conditions                        | S-2             |
| 3. Structures of Substrates                                   | S-3             |
| 4. Experimental Section                                       | S-5             |
| 5. Preliminary Mechanistic Studies                            | S-10            |
| 6. Experimental Data                                          | S-15            |
| 7. <sup>1</sup> H and <sup>13</sup> C NMR Spectra of Products | S-52            |

## 1. General Information

$\text{Pd}(\text{OAc})_2$  was purchased from Strem.  $\text{CuF}_2$  was purchased from Alfa Aesar. Unless otherwise noted, other reagents were purchased from Adamas-beta, J&K, 9-Ding, and Energy Chemical of the highest purity grade and used without further purification. The reaction was monitored by thin-layer chromatography (TLC), performed on 0.25 mm silica gel HSGF254. The TLC plates were visualized by ultraviolet light (254 nm) or treatment with potassium permanganate stain followed by gentle heating if needed.  $^1\text{H}$  NMR and  $^{13}\text{C}$  NMR spectra were recorded at 25 °C on a Bruker Advance 400M NMR spectrometers ( $\text{CDCl}_3$  as solvent). Chemical shifts for  $^1\text{H}$  NMR spectra are reported as  $\delta$  in units of parts per million (ppm) downfield from  $\text{SiMe}_4$  ( $\delta$  0.0) and relative to the signal of  $\text{SiMe}_4$  ( $\delta$  0.00 singlet). Multiplicities were given as: s (singlet); d (doublet); t (triplet); q (quartet); dd (doublet of doublets); dt (doublet of triplets); m (multiplets) and etc. Coupling constants are reported as a  $J$  value in Hz.  $^{13}\text{C}$  NMR spectra are reported as  $\delta$  in units of parts per million (ppm) downfield from  $\text{SiMe}_4$  ( $\delta$  0.0) and relative to the signal of chloroform- $d$  ( $\delta$  77.00 triplet). HRMS (ESI) spectra were recorded on Waters-XEVOG2 Q-TOF (Waters Corporation). Flash column chromatography was performed using 300-400 mesh silica gel with the indicated solvent system.

## 2. Optimization of Reaction Conditions.

**Table S1** Optimization of the palladium(II)-catalyzed directed hydroarylation of unactivated aliphatic alkenes **1a** with trimethoxyphenylsilane **2a**.<sup>a,b</sup>

Reaction scheme: **1a** + **2a**  $\xrightarrow{[\text{Pd}] (\text{cat.}), \text{additive}/\text{H}_2\text{O}}$  **3a**

| Entry           | Catalyst                                           | Additive               | Solvent           | Yield     |
|-----------------|----------------------------------------------------|------------------------|-------------------|-----------|
| 1               | Pd(OAc) <sub>2</sub>                               | LiF                    | DCE               | < 5       |
| 2               | Pd(OAc) <sub>2</sub>                               | NaF                    | DCE               | < 5       |
| 3               | Pd(OAc) <sub>2</sub>                               | KF                     | DCE               | < 5       |
| 4               | Pd(OAc) <sub>2</sub>                               | CsF                    | DCE               | < 5       |
| 5               | Pd(OAc) <sub>2</sub>                               | TBAF <sup>c</sup>      | DCE               | 0         |
| 6               | Pd(OAc) <sub>2</sub>                               | FeF <sub>3</sub>       | DCE               | 0         |
| 7               | Pd(OAc) <sub>2</sub>                               | ZnF <sub>2</sub>       | DCE               | 0         |
| 8               | Pd(OAc) <sub>2</sub>                               | MnF <sub>2</sub>       | DCE               | 0         |
| 9               | Pd(OAc) <sub>2</sub>                               | MgF <sub>2</sub>       | DCE               | < 5       |
| 10              | Pd(OAc) <sub>2</sub>                               | AgF                    | DCE               | 13        |
| 11              | Pd(OAc) <sub>2</sub>                               | CuF <sub>2</sub>       | DCE               | 56        |
| 12              | Pd(OAc) <sub>2</sub>                               | CuF <sub>2</sub>       | hexane            | 53        |
| 13              | Pd(OAc) <sub>2</sub>                               | CuF <sub>2</sub>       | toluene           | 65        |
| 14              | Pd(OAc) <sub>2</sub>                               | CuF <sub>2</sub>       | PhCF <sub>3</sub> | 67        |
| 15              | Pd(OAc) <sub>2</sub>                               | CuF <sub>2</sub>       | dioxane           | 73        |
| 16              | Pd(OAc) <sub>2</sub>                               | CuF <sub>2</sub>       | MeCN              | 48        |
| 17              | Pd(OAc) <sub>2</sub>                               | CuF <sub>2</sub>       | DMF               | 34        |
| 18              | Pd(OAc) <sub>2</sub>                               | CuF <sub>2</sub>       | DMSO              | 29        |
| 19              | Pd(OAc) <sub>2</sub>                               | CuF <sub>2</sub>       | acetone           | 67        |
| <b>20</b>       | <b>Pd(OAc)<sub>2</sub></b>                         | <b>CuF<sub>2</sub></b> | <b>THF</b>        | <b>82</b> |
| 21 <sup>d</sup> | Pd(OAc) <sub>2</sub>                               | CuF <sub>2</sub>       | THF               | 67        |
| 22              | Pd(OTFA) <sub>2</sub>                              | CuF <sub>2</sub>       | THF               | 58        |
| 23              | Pd(PPh <sub>3</sub> ) <sub>2</sub> Cl <sub>2</sub> | CuF <sub>2</sub>       | THF               | < 5       |
| 24              | Pd(MeCN) <sub>2</sub> Cl <sub>2</sub>              | CuF <sub>2</sub>       | THF               | 39        |
| 25              | Pd(dppf)Cl <sub>2</sub>                            | CuF <sub>2</sub>       | THF               | 13        |
| 26 <sup>e</sup> | Pd(OAc) <sub>2</sub>                               | CuF <sub>2</sub>       | THF               | 71        |
| 27 <sup>f</sup> | Pd(OAc) <sub>2</sub>                               | CuF <sub>2</sub>       | THF               | 73        |
| 28              | —                                                  | CuF <sub>2</sub>       | THF               | < 5       |
| 29              | Pd(OAc) <sub>2</sub>                               | —                      | THF               | 0         |

<sup>a</sup>Reaction conditions: **1a** (0.2 mmol), **2a** (0.4 mmol, 2.0 equiv), [Pd] catalyst (10 mol%), additive (0.4 mmol, 2.0 equiv), H<sub>2</sub>O (2.0 mmol, 10 equiv), solvent (2.0 mL), stirred at 100 °C under air for 24 h. <sup>b</sup>Isolated yields.

<sup>c</sup>TBAF (1.0 mol/L in THF). <sup>d</sup>At 80 °C. <sup>e</sup>Pd(OAc)<sub>2</sub> (5 mol%). <sup>f</sup>H<sub>2</sub>O (1.0 mmol, 5 equiv) was used.

### 3. Structure of Substrates

#### Unactivated alkene substrates

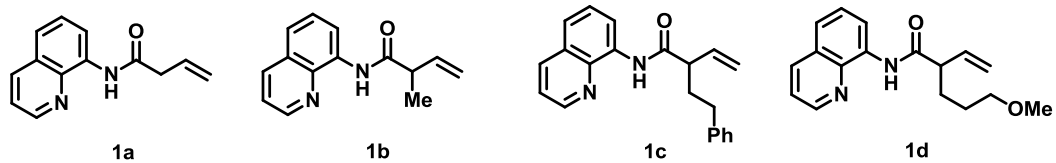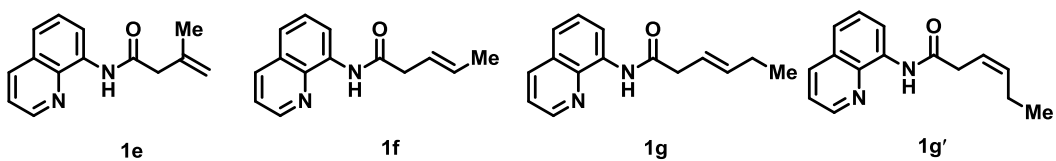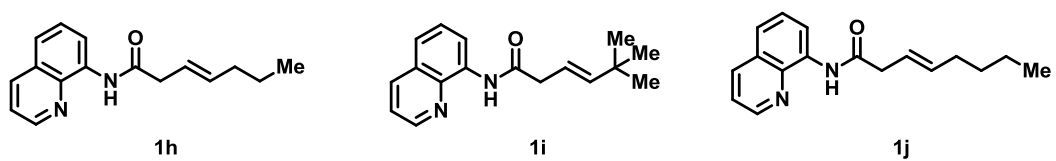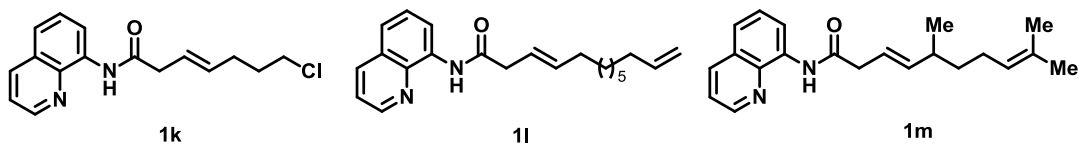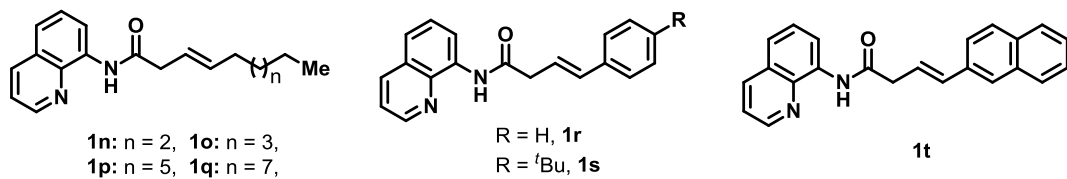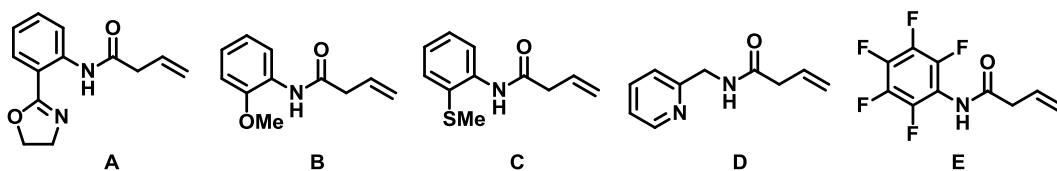



Arylsilane substrates

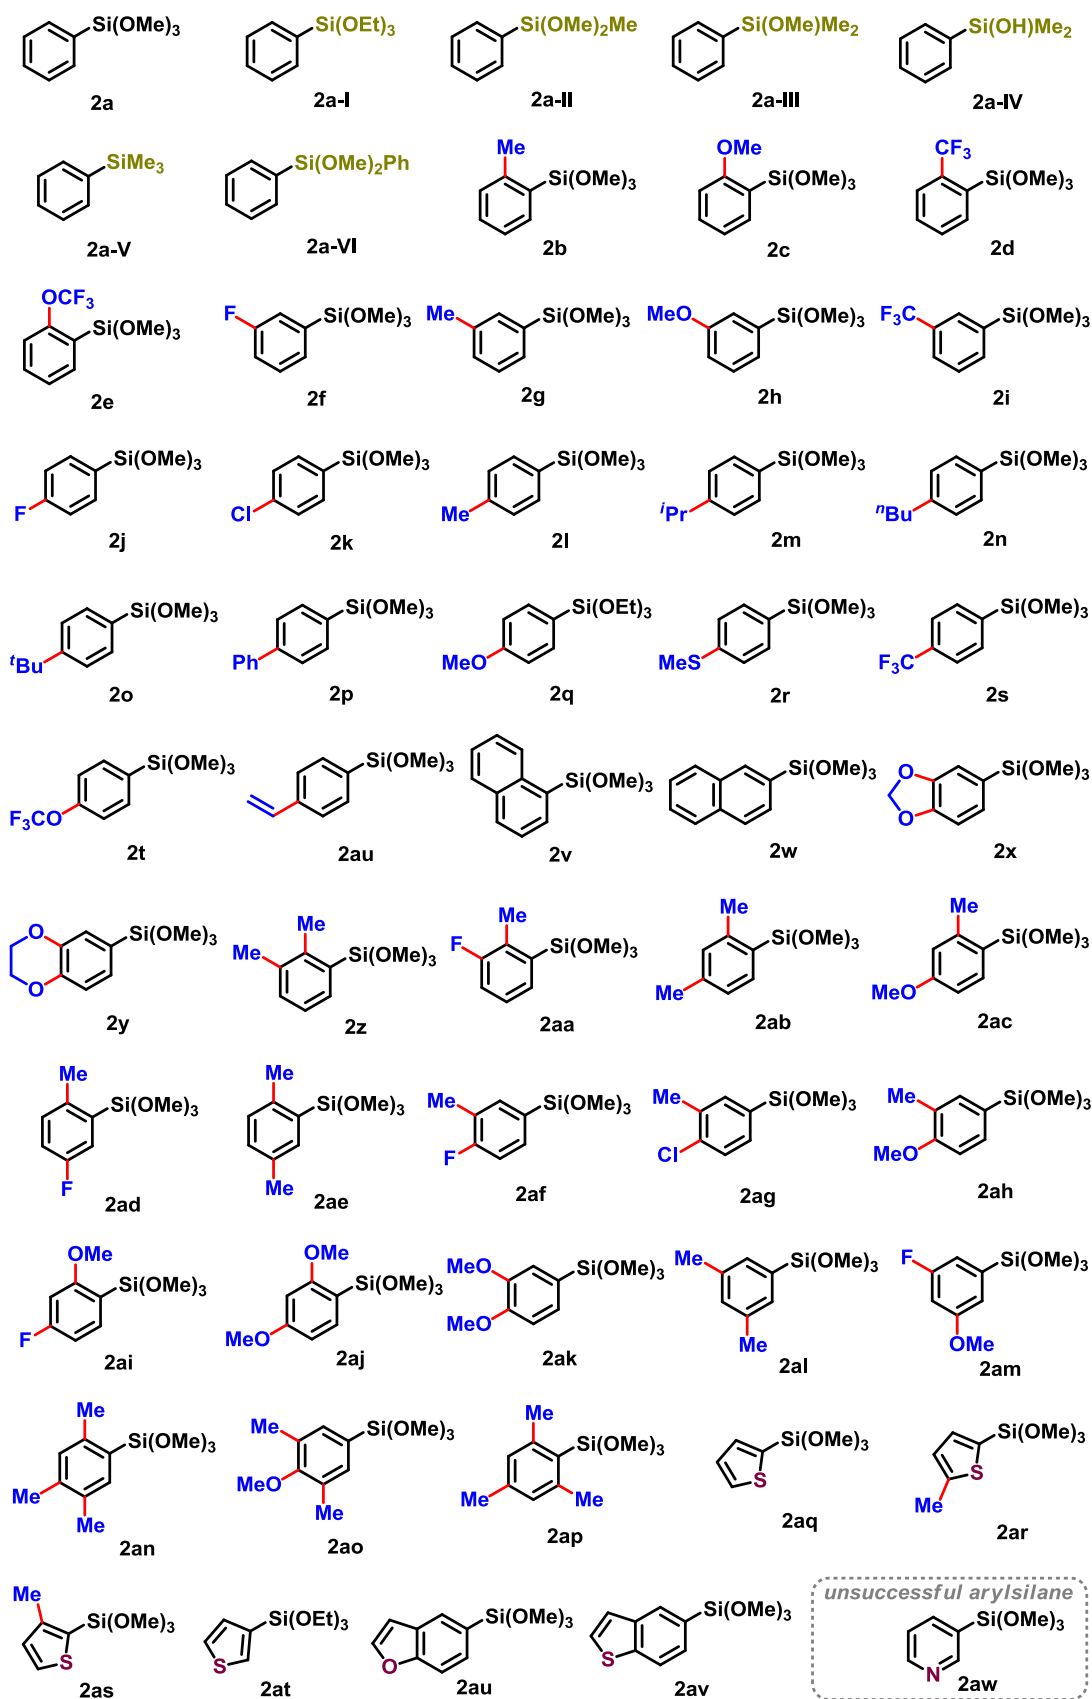

## 4. Experimental Section

All unactivated alkene substrates **1a-1t**, **A-E**, **6a-b** were synthesized readily from the corresponding vinyl acetic acid with 8-Aminoquinoline or arylamines according to the reported literature methods.<sup>1</sup> Arylsilanes **2a**, **2a I-VI**, **2l**, **2q**, **2v** were commercially available and used as received, other (hetero)arylsilanes **2b-2k**, **2m-2p** and **2w-2aw** were prepared from the corresponding Grignard reagents with tetramethyl orthosilicate according to the literature.<sup>3</sup> Unless otherwise noted, all reactions were performed under air atmosphere.

### 4.1 General Procedure for the Synthesis of Unactivated Alkene Substrates.<sup>1</sup>

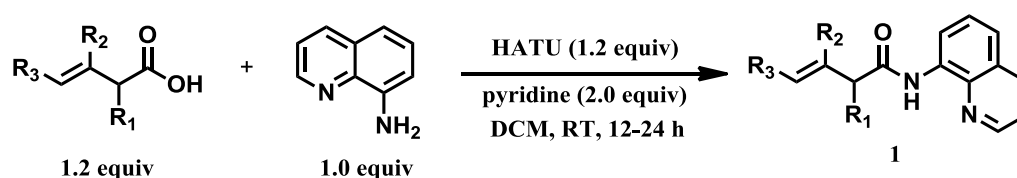

Following the reported literature method, corresponding vinyl acetic acid<sup>2</sup> (12 mmol, 1.2 equiv) was charged into a 250 mL RB flask containing 50 mL DCM. 8-Aminoquinoline (10 mmol, 1 equiv), pyridine (20 mmol, 2 equiv) and HATU (12 mmol, 1.2 equiv) were added sequentially and the reaction mixture was stirred at room temperature for 12-24 h. The deep brown solution was then diluted with EtOAc (50 mL), washed with sat. NaHCO<sub>3</sub> (3 × 50 mL), brine (1 × 50 mL). The organic phase was dried over anhydrous Na<sub>2</sub>SO<sub>4</sub>, concentrated in *vacuo* (T < 35 °C). The residue was further purified by flash column chromatography on silica gel (PE/EtOAc = 9:1) to afford the corresponding 3-alkenamides products.

### 4.2 General Procedure for the Preparation of Diverse (Hetero)arylsilanes.<sup>3</sup>

Unless otherwise noted, all reactions were performed on a 30 mmol scale. A 100 mL, three-neck, pear-shaped flask was fitted with an addition funnel, a reflux condenser, a rubber septum, and a stir bar. The flask was then charged with freshly washed magnesium turnings (0.79 g, 33 mmol), flame-dried under vacuum, and back-filled with argon. THF (30 mL) was added to the magnesium turnings via syringe. The addition funnel was charged with the aryl halide (30 mmol) in 10 mL THF. The

reaction was initiated by addition of 5-10 drops of the aryl halide solution to the magnesium turnings with stirring, followed by gentle heating. The rest of the aryl halide solution was then added at such a rate that the THF maintained a moderate reflux. Upon final addition, the solution was allowed to stir at room temperature until the complete consumption of aryl halide. The arylmagnesiumhalide solution was then transferred *via* cannula to a second flame-dried addition funnel, to which was fitted a 50 mL round-bottom flask containing tetraethyl orthosilicate or tetramethyl orthosilicate (90 mmol) in 20 mL of THF. The silane solution was cooled to -30 °C, and then the arylmagnesiumhalide solution was added dropwise (1 drop per second). The solution was allowed to stir at the indicated temperature for about 1 h and then at room temperature for 12 h. The crude mixture was poured into 50 mL of pentane in a 500 mL separatory funnel. The amber solution was then washed with water (50 mL), dried over anhydrous Na<sub>2</sub>SO<sub>4</sub>, and concentrated in *vacuo*. Further purification of the residue by short-path distillation gives the corresponding (hetero)arylsilanes.

#### 4.3 General Procedure for the Palladium(II)-Catalyzed Hydroarylation of Unactivated Alkenes **1a** with (Hetero)arylsilanes **2**.

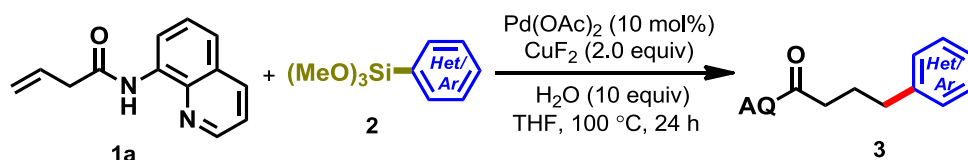

Pd(OAc)<sub>2</sub> (4.5 mg, 0.02 mmol, 10 mol%), alkene substrate **1a** (42.4 mg, 0.2 mmol), (hetero)arylsilane **2** (0.4 mmol, 2.0 equiv), CuF<sub>2</sub> (40.6 mg, 0.4 mmol) were sequentially weighed in air and paced into an oven-dried 35 mL sealed tube with a magnetic stir bar. H<sub>2</sub>O (36 µL, 2.0 mmol) and THF (2.0 mL) were added *via* syringe, and then the reaction mixture was heated to 100 °C and stirred for 24 h in an oil bath. After cooling to ambient temperature, the reaction mixture was diluted with DCM (10 mL) and filtered through a pad of celite. The filtrate was then concentrated in *vacuo* and the residue was purified by preparative TLC on silica gel with indicated eluent to afford the desired hydroarylation products **3**.

#### 4.4 General Procedure for the Palladium(II)-Catalyzed Hydroarylation of Unactivated Alkenes **1** with Trimethoxyphenylsilane **2a**.

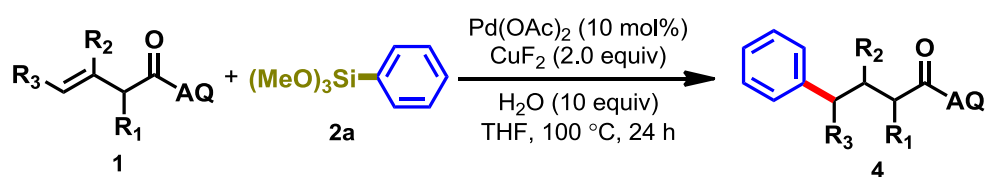

To an oven-dried sealed tube (35 mL) with a magnetic stir bar were sequentially added Pd(OAc)<sub>2</sub> (4.5 mg, 0.02 mmol, 10 mol%), alkene substrate **1** (0.2 mmol), trimethoxyphenylsilane **2a** (0.4 mmol, 2.0 equiv), CuF<sub>2</sub> (40.6 mg, 0.4 mmol). H<sub>2</sub>O (36 μL, 2.0 mmol) and THF (2.0 mL) were added *via* syringe. Then, the reaction mixture was heated to 100 °C and stirred for 24 h in an oil bath. After cooling to ambient temperature, the reaction mixture was diluted with DCM (10 mL) and filtered through a pad of celite. The filtrate was concentrated in *vacuo* and the residue was purified by preparative TLC on silica gel with indicated eluent to give the hydroarylation products **4**.

#### 4.5 General Procedure for Large-Scale Synthesis.

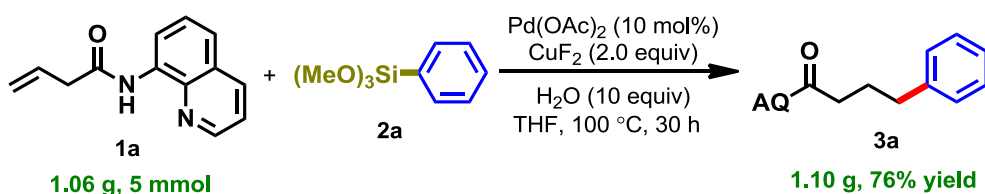

Pd(OAc)<sub>2</sub> (112.3 mg, 0.5 mmol, 10 mol%), alkene substrate **1a** (1.06 g, 5.0 mmol), trimethoxyphenylsilane **2a** (1.98 g, 10 mmol, 2.0 equiv), CuF<sub>2</sub> (1.01 g, 10 mmol, 2.0 equiv) were sequentially weighed in air and paced into an oven-dried 150 mL sealed tube with a magnetic stir bar. H<sub>2</sub>O (0.9 mL, 50 mmol, 10 equiv) and THF (50 mL) were added *via* syringe, and then the reaction mixture was heated to 100 °C and stirred for 30 h in an oil bath. After cooling to ambient temperature, the reaction mixture was diluted with DCM (120 mL) and filtered through a pad of celite. The filtrate was concentrated in *vacuo* and the residue was purified by flash column chromatography on silica gel (eluent: PE/EtOAc = 10/1) to afford the desired hydroarylation product **3a** (1.10 g, 76% yield) as an off-white solid.

#### 4.6 General Procedure for the Removal of Directing Group

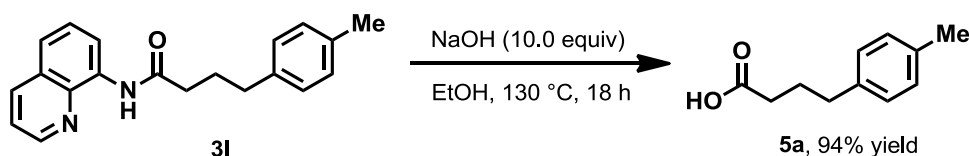

To an oven-dried sealed tube (35 mL) with a magnetic stir bar were subsequently added *N*-(quinolin-8-yl)-4-(p-tolyl)butanamide **3l** (60.9 mg, 0.2 mmol) and NaOH (80.0 mg, 2.0 mmol). EtOH (2.0 mL) were then added *via* syringe and the reaction mixture was stirred at 130 °C for 18 h in an oil bath. After cooling to room temperature, the reaction mixture was diluted with EtOAc (20 mL) and washed with HCl (1.0 M, 50 × 3mL). The combined organic layer was dried over anhydrous Na<sub>2</sub>SO<sub>4</sub> and concentrated in *vacuo*. The residue was purified by preparative TLC on silica gel using PE/EtOAc (5:1) to give the desired product **5a** (33.4 mg, 94% yield) as an off-white solid.

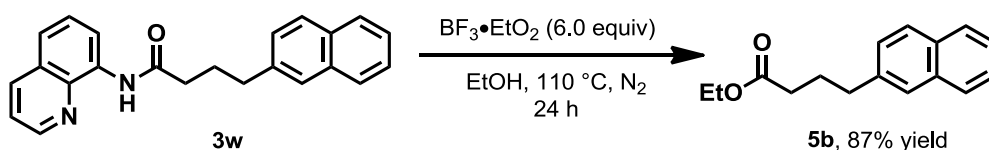

To an oven-dried sealed tube (35 mL) with a magnetic stir bar were subsequently added 4-(naphthalen-2-yl)-*N*-(quinolin-8-yl)butanamide **3w** (68.0 mg, 0.2 mmol), The tube was then evacuated and refilled with N<sub>2</sub> three times. BF<sub>3</sub> EtO<sub>2</sub> (150 μL, 1.2 mmol) and EtOH (2.0 mL) were added *via* syringe. The reaction mixture was stirred at 110 °C for 24 h in an oil bath. After cooling to ambient temperature, the mixture was diluted with DCM (15 mL) and then quenched by Et<sub>3</sub>N (0.28 mL, 10 equiv). The combined organic layer was dried over anhydrous Na<sub>2</sub>SO<sub>4</sub>, concentrated in *vacuo*. The residue was purified by preparative TLC on silica gel using PE/EtOAc (19:1) to give the desired product **5b** (42.2 mg, 87% yield) as a pale yellow oil.

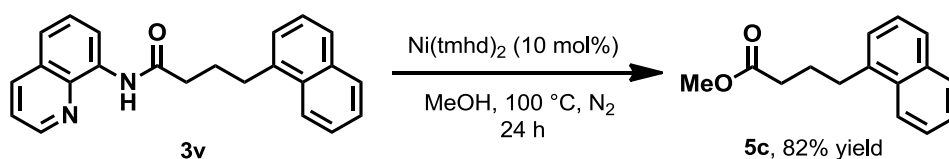

To an oven-dried sealed tube (35 mL) with a magnetic stir bar were subsequently

added 4-(naphthalen-1-yl)-*N*-(quinolin-8-yl)butanamide **3v** (98.2 mg, 0.288 mmol) and Ni(tmhd)<sub>2</sub> (12.2 mg, 10 mol%). The tube was evacuated and refilled with N<sub>2</sub> three times. MeOH (2.0 mL) were then added *via* syringe and the reaction mixture was stirred at 100 °C for 24 h in an oil bath. After cooling to ambient temperature, the reaction was diluted with DCM (15 mL). The combined organic layer was dried over anhydrous Na<sub>2</sub>SO<sub>4</sub>, concentrated in *vacuo*. The residue was purified by preparative TLC on silica gel using PE/EtOAc (19:1) to give the desired product **5c** (54.1 mg, 82% yield) as a pale yellow oil.

## 5. Preliminary Mechanistic Studies

### 5.1 Control Experiments

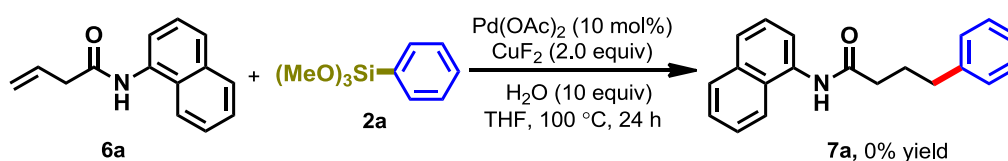

Following the general procedure, the reaction was carried out with  $\text{Pd}(\text{OAc})_2$  (4.5 mg, 0.02 mmol, 10 mol%), unactivated alkene substrate **6a** (42.2 mg, 0.2 mmol), trimethoxyphenylsilane **2a** (0.4 mmol, 2.0 equiv),  $\text{CuF}_2$  (40.6 mg, 0.4 mmol) were sequentially weighed in air and paced into an oven-dried 35 mL sealed tube with a magnetic stir bar.  $\text{H}_2\text{O}$  (36  $\mu\text{L}$ , 2.0 mmol) and THF (2.0 mL) were added *via* syringe, then the reaction mixture was heated to 100 °C and stirred for 24 h in an oil bath. After cooling to ambient temperature, the reaction mixture was diluted with DCM (10 mL), filtered through a pad of celite, concentrated in *vacuo*. The reaction was monitored by TLC and detected by  $^1\text{H}$  NMR, while no hydroarylation product **7a** has been found in the reaction mixture.

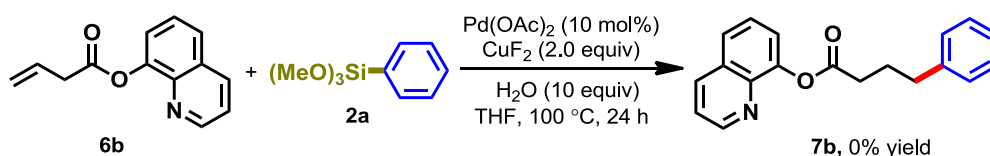

Following the general procedure, the reaction was carried out with  $\text{Pd}(\text{OAc})_2$  (4.5 mg, 0.02 mmol, 10 mol%), unactivated alkene substrate **6b** (42.6 mg, 0.2 mmol), trimethoxyphenylsilane **2a** (0.4 mmol, 2.0 equiv),  $\text{CuF}_2$  (40.6 mg, 0.4 mmol) were sequentially weighed in air and paced into an oven-dried 35 mL sealed tube with a magnetic stir bar.  $\text{H}_2\text{O}$  (36  $\mu\text{L}$ , 2.0 mmol) and THF (2.0 mL) were added *via* syringe, then the reaction mixture was heated to 100 °C and stirred for 24 h in an oil bath. After cooling to ambient temperature, the reaction mixture was diluted with DCM (10 mL), filtered through a pad of celite, concentrated in *vacuo*. The reaction was monitored by TLC and detected by  $^1\text{H}$  NMR, while no hydroarylation product **7b** has been found in the reaction mixture.

## 5.2 Intermolecular Competition Experiments

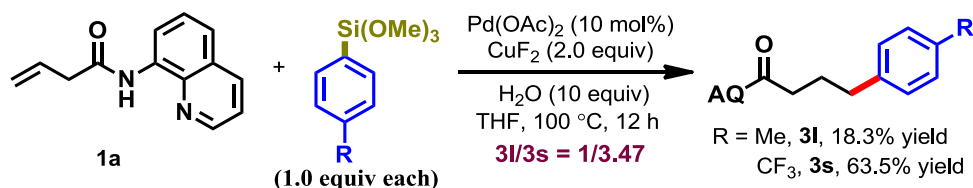

Following the general procedure, Pd(OAc)<sub>2</sub> (4.5 mg, 0.02 mmol, 10 mol%), alkene substrate **1a** (42.4 mg, 0.2 mmol), trimethoxy(*p*-tolyl)silane **2l** (0.2 mmol, 1.0 equiv), trimethoxy(4-(trifluoromethyl)phenyl)silane **2s** (0.2 mmol, 1.0 equiv), CuF<sub>2</sub> (40.6 mg, 0.4 mmol) were sequentially weighed in air and paced into an oven-dried 35 mL sealed tube with a magnetic stir bar. H<sub>2</sub>O (36 µL, 2.0 mmol) and THF (2.0 mL) were added *via* syringe, and then the reaction mixture was heated to 100 °C and stirred for 12 h in an oil bath. After cooling to ambient temperature, the reaction mixture was diluted with DCM (10 mL) and filtered through a pad of celite. The filtrate was then concentrated in *vacuo*. The residue was further purified by preparative TLC on silica gel using DCM/EtOAc (100:1) to give the desired hydroarylation **3l** and **3s** mixture as an off-white solid (56.7 mg), and the ratio of product **3l** and **3s** was then determined using <sup>1</sup>H NMR analysis (**3l**, 11.2 mg, 18.3% yield; **3s**, 45.5 mg, 63.5% yield).

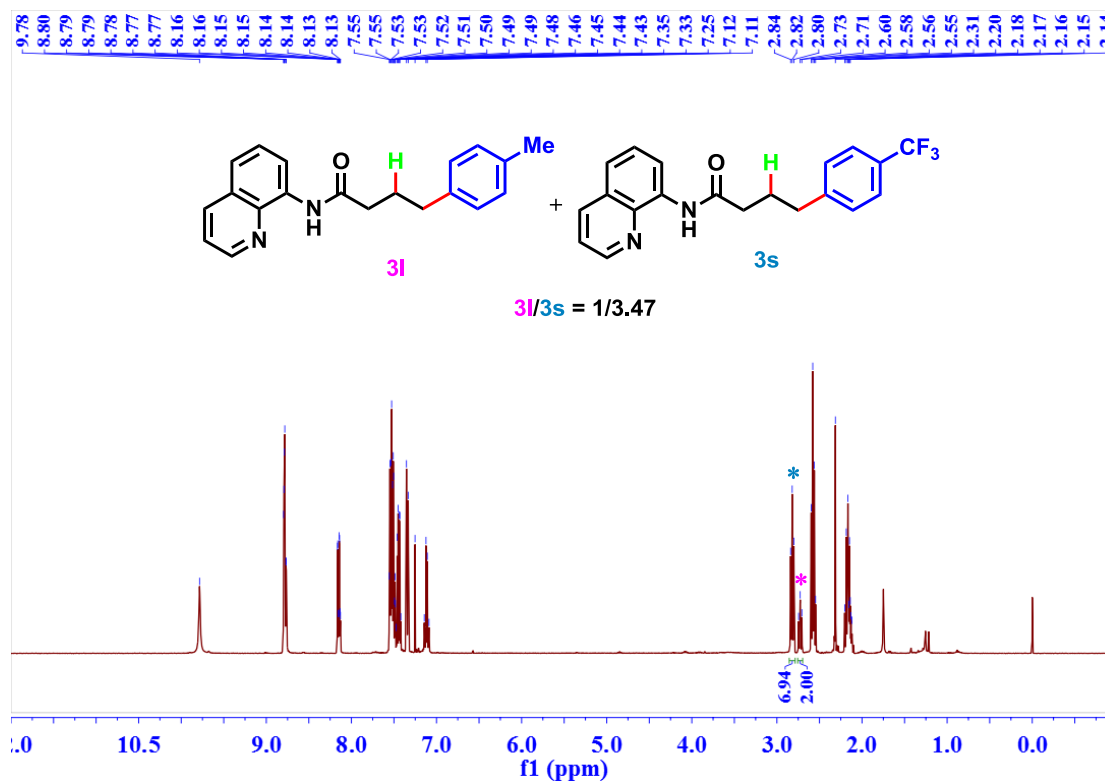



### 5.3 Scrambling Experiments

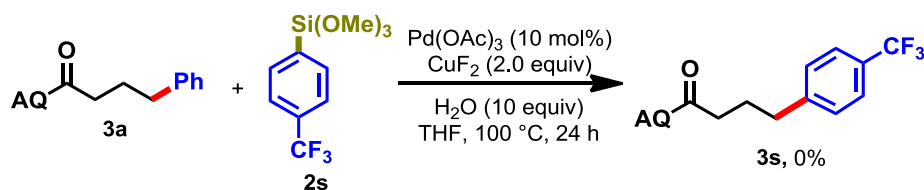

A mixture of 4-phenyl-*N*-(quinolin-8-yl)butanamide **3a** (58.0 mg, 0.2 mmol), trimethoxy(4-(trifluoromethyl)phenyl)silane **2s** (0.4 mmol, 2.0 equiv), Pd(OAc)<sub>2</sub> (4.5 mg, 10 mol%), CuF<sub>2</sub> (40.6 mg, 0.4 mmol) were sequentially weighed in air and paced into an oven-dried 35 mL sealed tube with a magnetic stir bar. H<sub>2</sub>O (36 μL, 2.0 mmol) and THF (2.0 mL) were added *via* syringe, the reaction mixture was then heated to 100 °C and stirred for 24 h in an oil bath. After cooling to ambient temperature, the reaction mixture was diluted with DCM (10 mL), filtered through a pad of celite, concentrated in *vacuo*. The starting material **3a** was recovered after 24 h, and no aryl exchange product **3s** was detected by <sup>1</sup>H NMR analysis, demonstrating the irreversibility of transmetalation and/or migratory insertion steps in the catalytic cycle.

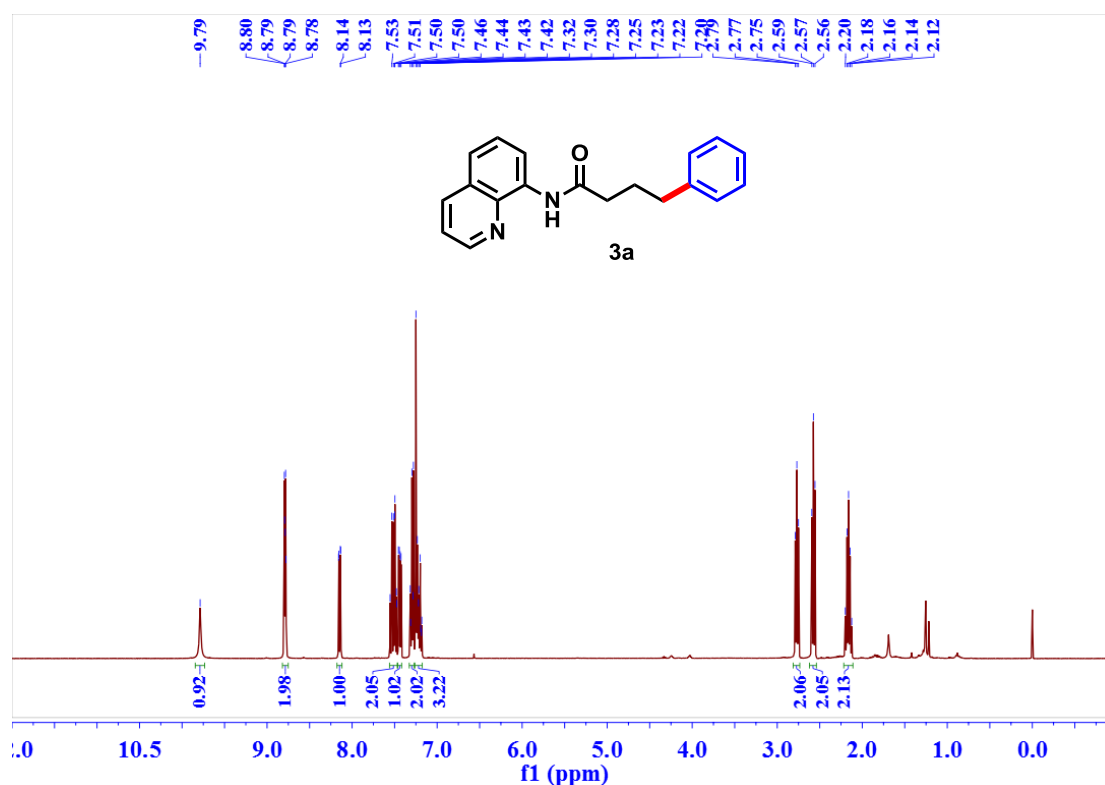

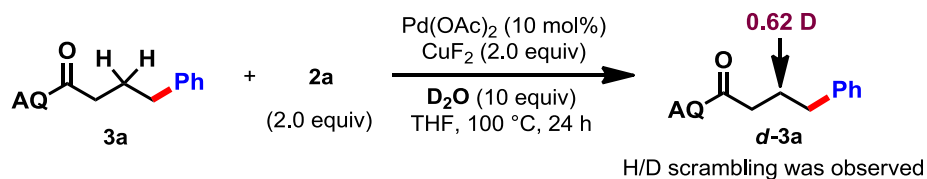

A mixture of 4-phenyl-*N*-(quinolin-8-yl)butanamide **3a** (58.0 mg, 0.2 mmol), Pd(OAc)<sub>2</sub> (4.5 mg, 10 mol%), trimethoxyphenylsilane **2a** (0.4 mmol, 2.0 equiv), CuF<sub>2</sub> (40.6 mg, 0.4 mmol) were sequentially weighed in air and paced into an oven-dried 35 mL sealed tube with a magnetic stir bar. D<sub>2</sub>O (40 μL, 2.0 mmol) and THF (2.0 mL) were added *via* syringe, the reaction mixture was then heated to 100 °C and stirred for 24 h in an oil bath. After cooling to ambient temperature, the reaction mixture was diluted with DCM (10 mL), filtered through a pad of celite, concentrated in *vacuo*. The residue was purified by preparative TLC on silica gel using DCM/EtOAc (100:1) as eluent. The deuterium incorporation result (62%) was detected by <sup>1</sup>H NMR analysis.

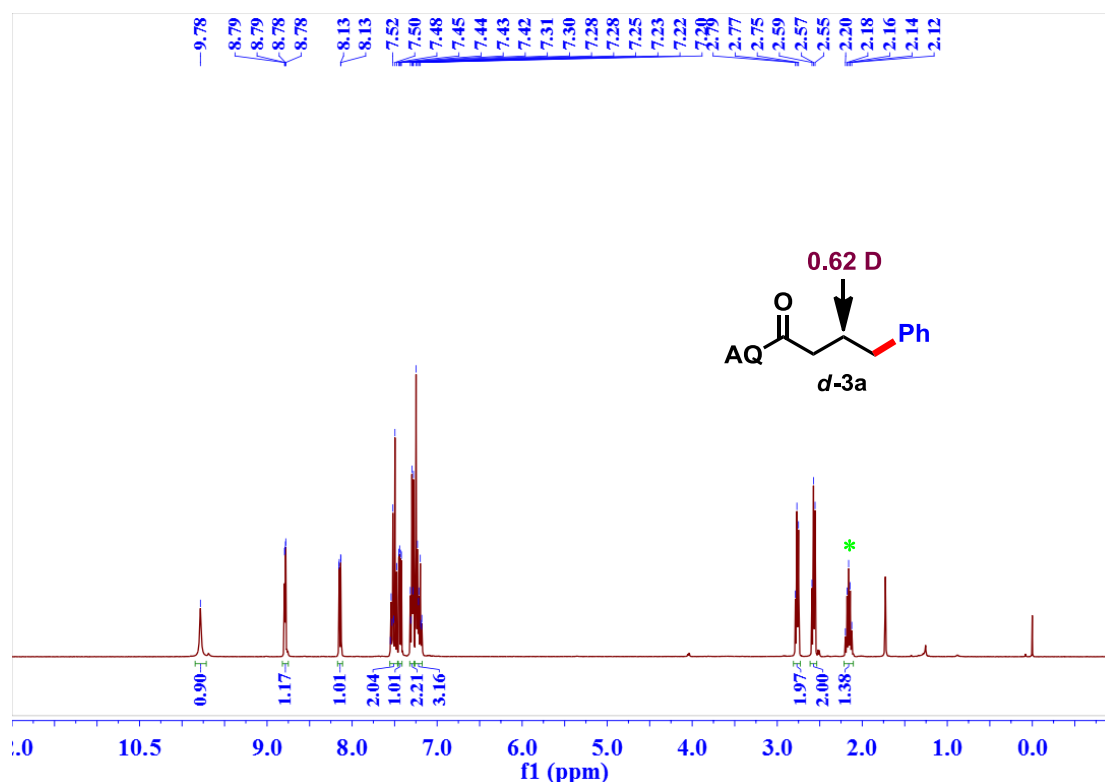

## 5.4 Deuteration Experiments

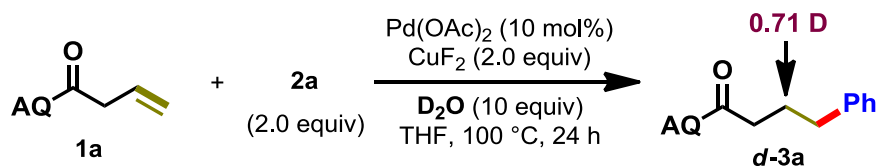

To an oven-dried sealed tube (35 mL) with a magnetic stir bar were sequentially added  $\text{Pd}(\text{OAc})_2$  (4.5 mg, 0.02 mmol, 10 mol%), alkene substrate **1a** (42.4 mg, 0.2 mmol), trimethoxyphenylsilane **2a** (0.4 mmol, 2.0 equiv),  $\text{CuF}_2$  (40.6 mg, 0.4 mmol).  $\text{D}_2\text{O}$  (40  $\mu\text{L}$ , 2.0 mmol) and THF (2.0 mL) were added *via* syringe. Then, the reaction mixture was heated to 100 °C and stirred for 24 h in an oil bath. After cooling to ambient temperature, the mixture was diluted with DCM (10 mL) and filtered through a pad of celite. The filtrate was concentrated in *vacuo* and the residue was purified by preparative TLC on silica gel using DCM/EtOAc (100:1) as eluent to give the deuterium incorporation product **3a/d-3a** as an off-white solid (43.6 mg, 75% yield).

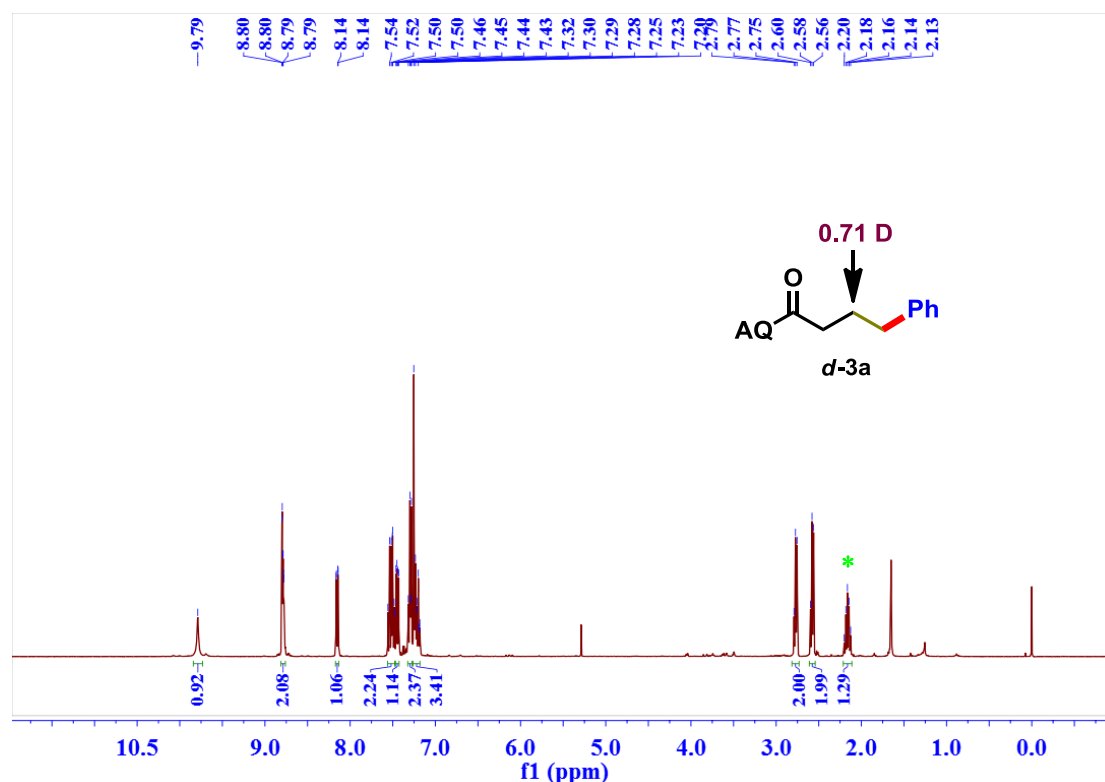

## 6. Experimental data

### 2-phenethyl-*N*-(quinolin-8-yl)but-3-enamide (**1c**)

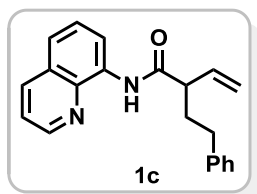

Following the general procedure, the desired product **1c** was isolated by flash column chromatography on silica gel (eluent: PE/EtOAc = 9/1) as an off-white solid (2.56 g, 81% yield). **<sup>1</sup>H NMR (400 MHz, CDCl<sub>3</sub>)** δ 9.98 (s, 1H), 8.82-8.76 (m, 2H), 8.14 (dd, *J* = 8.3, 1.6 Hz, 1H), 7.56-7.47 (m, 2H), 7.44 (dd, *J* = 8.3, 4.2 Hz, 1H), 7.31-7.17 (m, 5H), 6.11-6.00 (m, 1H), 5.36 (t, *J* = 13.6 Hz, 2H), 3.20 (dd, *J* = 15.4, 7.6 Hz, 1H), 2.80-2.67 (m, 2H), 2.43-2.32 (m, 1H), 2.07-1.94 (m, 1H); **<sup>13</sup>C NMR (100 MHz, CDCl<sub>3</sub>)** δ 171.7, 148.2, 141.5, 138.6, 136.8, 136.3, 134.5, 128.5, 127.9, 127.4, 125.9, 121.54, 121.50, 118.4, 116.4, 52.6, 33.3, 33.2; **HRMS *m/z* [M+H]<sup>+</sup>** calculated for C<sub>21</sub>H<sub>21</sub>N<sub>2</sub>O<sup>+</sup>: 317.1654, found: 317.1656.

### 5-methoxy-*N*-(quinolin-8-yl)-2-vinylpentanamide (**1d**)

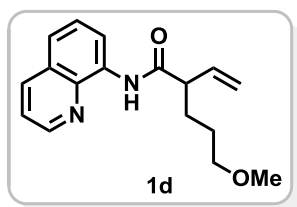

Following the general procedure, the desired product **1d** was isolated by flash column chromatography on silica gel (eluent: PE/EtOAc = 5/1) as an off-white solid (1.87 g, 66% yield). **<sup>1</sup>H NMR (400 MHz, CDCl<sub>3</sub>)** δ 10.00 (s, 1H), 8.83-8.76 (m, 2H), 8.14 (dd, *J* = 8.3, 1.6 Hz, 1H), 7.55-7.47 (m, 2H), 7.44 (dd, *J* = 8.3, 4.2 Hz, 1H), 6.08-5.97 (m, 1H), 5.41-5.26 (m, 2H), 3.48-3.37 (m, 2H), 3.33 (s, 3H), 3.22 (dd, *J* = 15.4, 7.4 Hz, 1H), 2.14-2.01 (m, 1H), 1.83-1.62 (m, 3H); **<sup>13</sup>C NMR (100 MHz, CDCl<sub>3</sub>)** δ 171.9, 148.2, 138.6, 136.9, 136.3, 134.5, 127.9, 127.3, 121.5, 121.4, 118.1, 116.4, 72.5, 58.5, 53.2, 28.7, 27.3; **HRMS *m/z* [M+H]<sup>+</sup>** calculated for C<sub>17</sub>H<sub>21</sub>N<sub>2</sub>O<sub>2</sub><sup>+</sup>: 285.1603, found: 285.1605.

**(E)-N-(quinolin-8-yl)hept-3-enamide (1h)**

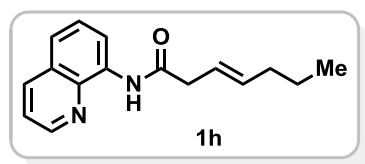

Following the general procedure, the desired product **1h** was isolated by flash column chromatography on silica gel (eluent: PE/EtOAc = 9/1) as an off-white solid (1.96 g, 77% yield). **<sup>1</sup>H NMR (400 MHz, CDCl<sub>3</sub>)** δ 10.07 (s, 1H), 8.82-8.73 (m, 2H), 8.14 (dd, *J* = 8.3, 1.5 Hz, 1H), 7.55-7.46 (m, 2H), 7.43 (dd, *J* = 8.3, 4.2 Hz, 1H), 5.87-5.79 (m, 1H), 5.79-5.70 (m, 1H), 3.27 (d, *J* = 6.7 Hz, 2H), 2.15 (q, *J* = 6.9 Hz, 2H), 1.60-1.47 (m, 2H), 0.99 (t, *J* = 7.4 Hz, 3H); **<sup>13</sup>C NMR (100 MHz, CDCl<sub>3</sub>)** δ 170.0, 148.1, 138.5, 137.0, 136.2, 134.5, 127.9, 127.3, 122.4, 121.5, 121.4, 116.3, 42.2, 34.8, 22.4, 13.7; **HRMS m/z [M+H]<sup>+</sup>** calculated for C<sub>16</sub>H<sub>19</sub>N<sub>2</sub>O<sup>+</sup>: 255.1497, found: 255.1502.

**(E)-8-chloro-N-(quinolin-8-yl)oct-3-enamide (1k)**

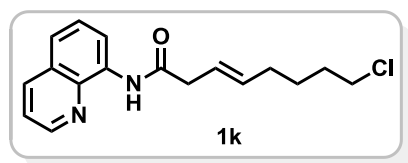

Following the general procedure, the desired product **1k** was isolated by flash column chromatography on silica gel (eluent: PE/EtOAc = 9/1) as pale yellow oil (2.20 g, 73% yield). **<sup>1</sup>H NMR (400 MHz, CDCl<sub>3</sub>)** δ 10.02 (s, 1H), 8.82-8.73 (m, 2H), 8.14 (d, *J* = 8.3 Hz, 1H), 7.55-7.47 (m, 2H), 7.44 (dd, *J* = 8.3, 4.2 Hz, 1H), 5.87-5.74 (m, 2H), 3.64 (t, *J* = 6.7 Hz, 2H), 3.29 (d, *J* = 5.6 Hz, 2H), 2.37-2.29 (m, 2H), 1.99 (p, *J* = 6.8 Hz, 2H); **<sup>13</sup>C NMR (100 MHz, CDCl<sub>3</sub>)** δ 169.6, 148.2, 138.5, 136.3, 134.9, 134.3, 127.9, 127.3, 123.9, 121.53, 121.51, 116.3, 44.3, 42.0, 32.0, 29.7; **HRMS m/z [M+H]<sup>+</sup>** calculated for C<sub>17</sub>H<sub>20</sub>ClN<sub>2</sub>O<sup>+</sup>: 303.1264, found: 303.1266.

**(E)-N-(quinolin-8-yl)trideca-3,12-dienamide (1l)**

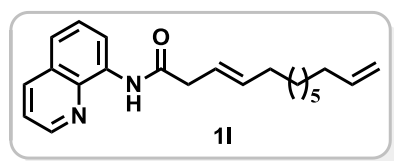

Following the general procedure, the desired product **11** was isolated by flash column chromatography on silica gel (eluent: PE/EtOAc = 9/1) as a brown oil (2.39 g, 71% yield). **<sup>1</sup>H NMR (400 MHz, CDCl<sub>3</sub>)** δ 10.06 (s, 1H), 8.82-8.73 (m, 2H), 8.14 (dd, *J* = 8.3, 1.5 Hz, 1H), 7.55-7.46 (m, 2H), 7.43 (dd, *J* = 8.3, 4.2 Hz, 1H), 5.88-5.69 (m, 3H), 5.03-4.89 (m, 2H), 3.27 (d, *J* = 6.8 Hz, 2H), 2.16 (dd, *J* = 14.2, 6.9 Hz, 2H), 2.02 (q, *J* = 6.9 Hz, 2H), 1.56-1.44 (m, 2H), 1.41-1.25 (m, 8H); **<sup>13</sup>C NMR (100 MHz, CDCl<sub>3</sub>)** δ 171.0, 148.1, 139.1, 138.5, 137.1, 136.2, 134.5, 127.9, 127.3, 122.2, 121.5, 121.4, 116.3, 114.1, 42.1, 33.7, 32.7, 29.4, 29.2, 29.1, 29.0, 28.9; **HRMS *m/z* [M+H]<sup>+</sup>** calculated for C<sub>22</sub>H<sub>29</sub>N<sub>2</sub>O<sup>+</sup>: 337.2280, found: 337.2282.

**(*E*)-*N*-(quinolin-8-yl)dec-3-enamide (1o)**

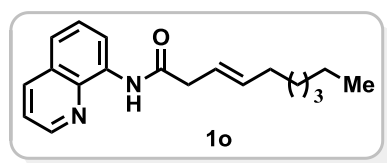

Following the general procedure, the desired product **1o** was isolated by flash column chromatography on silica gel (eluent: PE/EtOAc = 9/1) as a pale yellow oil (2.43 g, 82% yield). **<sup>1</sup>H NMR (400 MHz, CDCl<sub>3</sub>)** δ 10.06 (s, 1H), 8.77 (d, *J* = 5.7 Hz, 2H), 8.15 (d, *J* = 8.3 Hz, 1H), 7.57-7.47 (m, 2H), 7.44 (dd, *J* = 8.3, 4.2 Hz, 1H), 5.88-5.79 (m, 1H), 5.79-5.69 (m, 1H), 3.27 (d, *J* = 6.9 Hz, 2H), 2.16 (dd, *J* = 14.3, 7.0 Hz, 2H), 1.54-1.45 (m, 2H), 1.40-1.27 (m, 6H), 0.88 (t, *J* = 6.7 Hz, 3H); **<sup>13</sup>C NMR (100 MHz, CDCl<sub>3</sub>)** δ 170.1, 148.1, 138.6, 137.2, 136.2, 134.5, 127.9, 127.4, 122.2, 121.5, 121.4, 116.3, 42.2, 32.7, 31.8, 29.3, 28.9, 22.6, 14.1; **HRMS *m/z* [M+H]<sup>+</sup>** calculated for C<sub>19</sub>H<sub>25</sub>N<sub>2</sub>O<sup>+</sup>: 297.1967, found: 297.1970.

**(*E*)-*N*-(quinolin-8-yl)dodec-3-enamide (1p)**

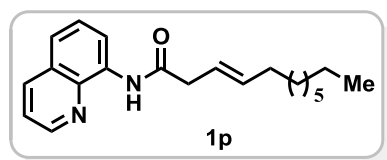

Following the general procedure, the desired product **1p** was isolated by flash column chromatography on silica gel (eluent: PE/EtOAc = 9/1) as a pale yellow oil (2.14 g,

66% yield). **<sup>1</sup>H NMR (400 MHz, CDCl<sub>3</sub>)** δ 10.06 (s, 1H), 8.82-8.74 (m, 2H), 8.14 (dd, *J* = 8.3, 1.5 Hz, 1H), 7.56-7.46 (m, 2H), 7.43 (dd, *J* = 8.3, 4.2 Hz, 1H), 5.88-5.79 (m, 1H), 5.78-5.69 (m, 1H), 3.27 (d, *J* = 7.0 Hz, 2H), 2.16 (dd, *J* = 14.3, 6.9 Hz, 2H), 1.55-1.45 (m, 2H), 1.40-1.22 (m, 10H), 0.87 (t, *J* = 6.8 Hz, 3H); **<sup>13</sup>C NMR (100 MHz, CDCl<sub>3</sub>)** δ 170.1, 148.1, 138.6, 137.2, 136.2, 134.5, 127.9, 127.4, 122.1, 121.5, 121.4, 116.3, 42.2, 32.7, 31.9, 29.5, 29.3, 29.2, 22.6, 14.1; **HRMS *m/z* [M+H]<sup>+</sup>** calculated for C<sub>21</sub>H<sub>29</sub>N<sub>2</sub>O<sup>+</sup>: 325.2280, found: 325.2280.

**(*E*)-*N*-(quinolin-8-yl)tetradec-3-enamide (1q)**

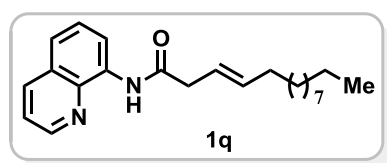

Following the general procedure, the desired product **1q** was isolated by flash column chromatography on silica gel (eluent: PE/EtOAc = 9/1) as a yellow oil (2.75 g, 78% yield). **<sup>1</sup>H NMR (400 MHz, CDCl<sub>3</sub>)** δ 10.06 (s, 1H), 8.79-8.76 (m, 2H), 8.15 (dd, *J* = 8.3, 1.5 Hz, 1H), 7.56-7.47 (m, 2H), 7.44 (dd, *J* = 8.3, 4.2 Hz, 1H), 5.88-5.79 (m, 1H), 5.78-5.70 (m, 1H), 3.27 (d, *J* = 6.9 Hz, 2H), 2.16 (dd, *J* = 14.3, 7.0 Hz, 2H), 1.54-1.45 (m, 2H), 1.40-1.21 (m, 14H), 0.87 (t, *J* = 6.9 Hz, 3H); **<sup>13</sup>C NMR (100 MHz, CDCl<sub>3</sub>)** δ 170.1, 148.1, 138.6, 137.3, 136.2, 134.5, 127.9, 127.4, 122.2, 121.5, 121.4, 116.3, 42.2, 32.7, 31.9, 29.61, 29.56, 29.32, 29.30, 29.27, 22.7, 14.1; **HRMS *m/z* [M+H]<sup>+</sup>** calculated for C<sub>23</sub>H<sub>33</sub>N<sub>2</sub>O<sup>+</sup>: 353.2593, found: 353.2594.

**(*E*)-4-(4-(*tert*-butyl)phenyl)-*N*-(quinolin-8-yl)but-3-enamide (1s)**

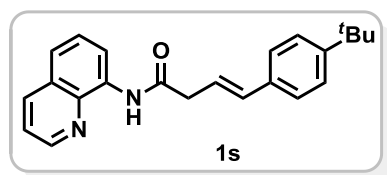

Following the general procedure, the desired product **1s** was isolated by flash column chromatography on silica gel (eluent: PE/EtOAc = 9/1) as a brown solid (1.62 g, 47% yield). **<sup>1</sup>H NMR (400 MHz, CDCl<sub>3</sub>)** δ 10.06 (s, 1H), 8.75 (dd, *J* = 14.4, 5.7 Hz, 2H), 8.14 (d, *J* = 8.2 Hz, 1H), 7.57-7.47 (m, 2H), 7.46-7.33 (m, 5H), 6.70 (d, *J* = 15.8 Hz,

1H), 6.51-6.40 (m, 1H), 3.49 (d,  $J = 7.2$  Hz, 2H), 1.33 (s, 9H);  $^{13}\text{C}$  NMR (100 MHz,  $\text{CDCl}_3$ )  $\delta$  169.4, 150.8, 148.2, 138.5, 136.3, 134.7, 134.4, 134.2, 127.9, 127.4, 126.2, 125.5, 121.5, 116.4, 42.4, 34.6, 31.3; HRMS  $m/z$   $[\text{M}+\text{H}]^+$  calculated for  $\text{C}_{23}\text{H}_{25}\text{N}_2\text{O}^+$ : 345.1967, found: 345.1963.

**(*E*)-4-(naphthalen-2-yl)-*N*-(quinolin-8-yl)but-3-enamide (1t)**

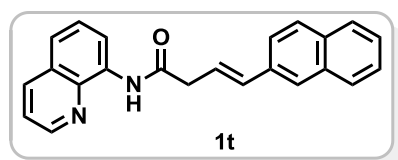

Following the general procedure, the desired product **1t** was isolated by flash column chromatography on silica gel (eluent: PE/EtOAc = 9/1) as an off-white solid (1.83 g, 54% yield).  $^1\text{H}$  NMR (400 MHz,  $\text{CDCl}_3$ )  $\delta$  10.11 (s, 1H), 8.79 (dd,  $J = 7.4, 1.3$  Hz, 1H), 8.71 (dd,  $J = 4.2, 1.6$  Hz, 1H), 8.13 (dd,  $J = 8.3, 1.5$  Hz, 1H), 7.85-7.77 (m, 4H), 7.68 (dd,  $J = 8.8, 1.2$  Hz, 1H), 7.57-7.38 (m, 5H), 6.87 (d,  $J = 15.8$  Hz, 1H), 6.68-6.58 (m, 1H), 3.56 (dd,  $J = 7.2, 0.9$  Hz, 2H);  $^{13}\text{C}$  NMR (100 MHz,  $\text{CDCl}_3$ )  $\delta$  169.3, 148.2, 138.5, 136.3, 135.0, 134.43, 134.38, 133.6, 133.1, 128.2, 128.0, 127.9, 127.7, 127.4, 126.30, 126.25, 125.9, 123.7, 122.8, 121.60, 121.57, 116.4, 42.4; HRMS  $m/z$   $[\text{M}+\text{H}]^+$  calculated for  $\text{C}_{23}\text{H}_{19}\text{N}_2\text{O}^+$ : 339.1497, found: 339.1495.

**4-phenyl-*N*-(quinolin-8-yl)butanamide (3a)<sup>4a</sup>**

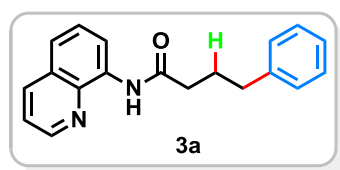

Following the general procedure, the desired product **3a** was isolated by preparative TLC on silica gel (eluent: DCM/EtOAc = 100/1) as an off-white solid (47.6 mg, 82% yield).  $^1\text{H}$  NMR (400 MHz,  $\text{CDCl}_3$ )  $\delta$  9.79 (s, 1H), 8.81-8.77 (m, 2H), 8.14 (dd,  $J = 8.2, 1.3$  Hz, 1H), 7.56-7.47 (m, 2H), 7.44 (dd,  $J = 8.2, 4.2$  Hz, 1H), 7.32-7.27 (m, 2H), 7.26-7.17 (m, 3H), 2.77 (t,  $J = 7.5$  Hz, 2H), 2.57 (t,  $J = 7.5$  Hz, 2H), 2.21-2.11 (m, 2H);  $^{13}\text{C}$  NMR (100 MHz,  $\text{CDCl}_3$ )  $\delta$  171.4, 148.1, 141.5, 138.3, 136.3, 134.5, 128.5, 128.4, 127.9, 127.4, 125.9, 121.5, 121.3, 116.4, 37.3, 35.2, 27.0.



***N*-(quinolin-8-yl)-4-(*o*-tolyl)butanamide (3b)<sup>4a</sup>**

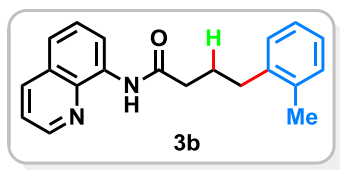

Following the general procedure, the desired product **3b** was isolated by preparative TLC on silica gel (eluent: DCM/EtOAc = 100/1) as an off-white solid (41.7 mg, 69% yield). **<sup>1</sup>H NMR (400 MHz, CDCl<sub>3</sub>)** δ 9.80 (s, 1H), 8.83-8.75 (m, 2H), 8.14 (dd, *J* = 8.3, 1.6 Hz, 1H), 7.56-7.46 (m, 2H), 7.43 (dd, *J* = 8.3, 4.2 Hz, 1H), 7.21-7.17 (m, 1H), 7.16-7.08 (m, 3H), 2.75 (t, *J* = 7.5 Hz, 2H), 2.62 (t, *J* = 7.4 Hz, 2H), 2.33 (s, 3H), 2.16-2.07 (m, 2H); **<sup>13</sup>C NMR (100 MHz, CDCl<sub>3</sub>)** δ 171.3, 148.1, 139.7, 138.3, 136.3, 136.0, 134.5, 130.2, 129.0, 127.9, 127.4, 126.1, 125.9, 121.5, 121.3, 116.4, 37.6, 32.6, 25.7, 19.3.

**4-(2-methoxyphenyl)-*N*-(quinolin-8-yl)butanamide (3c)<sup>4c</sup>**

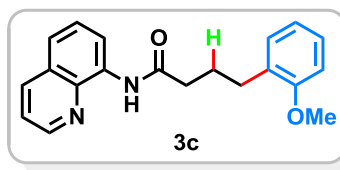

Following the general procedure, the desired product **3c** was isolated by preparative TLC on silica gel (eluent: PE/EtOAc = 9/1) as a yellow oil (49.9 mg, 78% yield). **<sup>1</sup>H NMR (400 MHz, CDCl<sub>3</sub>)** δ 9.80 (s, 1H), 8.85-8.77 (m, 2H), 8.15 (dd, *J* = 8.3, 1.6 Hz, 1H), 7.57-7.46 (m, 2H), 7.44 (dd, *J* = 8.3, 4.2 Hz, 1H), 7.23-7.17 (m, 2H), 6.90 (t, *J* = 7.4 Hz, 1H), 6.85 (d, *J* = 8.4 Hz, 1H), 3.81 (s, 3H), 2.79 (t, *J* = 7.4 Hz, 2H), 2.59 (t, *J* = 7.6 Hz, 2H), 2.20-2.10 (m, 2H); **<sup>13</sup>C NMR (100 MHz, CDCl<sub>3</sub>)** δ 171.7, 157.5, 148.0, 138.3, 136.3, 134.6, 130.1, 129.8, 127.9, 127.4, 127.2, 121.5, 121.2, 120.4, 116.4, 110.2, 55.2, 37.6, 29.6, 25.6.

***N*-(quinolin-8-yl)-4-(2-(trifluoromethyl)phenyl)butanamide (3d)**

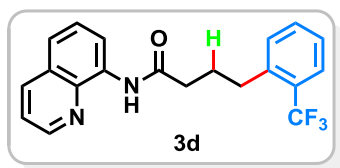

Following the general procedure, the desired product **3d** was isolated by preparative TLC on silica gel (eluent: DCM/EtOAc = 100/1) as an off-white solid (58.1 mg, 81% yield). **<sup>1</sup>H NMR (400 MHz, CDCl<sub>3</sub>)** δ 9.82 (s, 1H), 8.83-8.76 (m, 2H), 8.15 (dd, *J* = 8.3, 1.5 Hz, 1H), 7.62 (d, *J* = 7.9 Hz, 1H), 7.56-7.41 (m, 5H), 7.28 (t, *J* = 7.6 Hz, 1H), 2.97-2.91 (m, 2H), 2.65 (t, *J* = 7.5 Hz, 2H), 2.22-2.12 (m, 2H); **<sup>13</sup>C NMR (100 MHz, CDCl<sub>3</sub>)** δ 171.0, 148.1, 140.4, 138.3, 136.3, 134.5, 131.8, 131.1, 128.5 (d, *J* = 29.5 Hz), 127.9, 126.0, 125.9 (q, *J* = 5.7 Hz), 123.3, 121.6, 121.4, 116.4, 37.5, 31.9, 27.1; **<sup>19</sup>F NMR (376 MHz, CDCl<sub>3</sub>)** δ -59.48; **HRMS *m/z* [M+H]<sup>+</sup>** calculated for C<sub>20</sub>H<sub>18</sub>F<sub>3</sub>N<sub>2</sub>O<sup>+</sup>: 359.1371, found: 359.1378.

***N*-(quinolin-8-yl)-4-(2-(trifluoromethoxy)phenyl)butanamide (3e)**

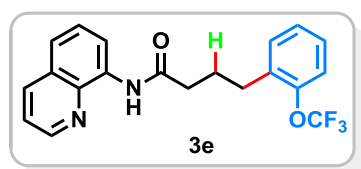

Following the general procedure, the desired product **3e** was isolated by preparative TLC on silica gel (eluent: DCM/EtOAc = 100/1) as an off-white solid (63.3 mg, 84% yield). **<sup>1</sup>H NMR (400 MHz, CDCl<sub>3</sub>)** δ 9.83 (s, 1H), 8.86-8.77 (m, 2H), 8.17 (dd, *J* = 8.3, 1.6 Hz, 1H), 7.58-7.49 (m, 2H), 7.46 (dd, *J* = 8.3, 4.2 Hz, 1H), 7.39-7.34 (m, 1H), 7.29-7.22 (m, 3H), 2.90-2.83 (m, 2H), 2.63 (t, *J* = 7.5 Hz, 2H), 2.23-2.13 (m, 2H); **<sup>13</sup>C NMR (100 MHz, CDCl<sub>3</sub>)** δ 171.1, 148.1, 147.7, 138.3, 136.3, 134.5, 133.9, 130.8, 127.9, 127.4, 127.4, 126.8, 121.5, 121.4, 120.6 (d, *J* = 255.6 Hz), 120.5, 116.4, 37.3, 29.1, 25.6; **<sup>19</sup>F NMR (376 MHz, CDCl<sub>3</sub>)** δ -56.95; **HRMS *m/z* [M+H]<sup>+</sup>** calculated for C<sub>20</sub>H<sub>18</sub>F<sub>3</sub>N<sub>2</sub>O<sub>2</sub><sup>+</sup>: 375.1320, found: 375.1314.

**4-(3-fluorophenyl)-*N*-(quinolin-8-yl)butanamide (3f)<sup>4a</sup>**

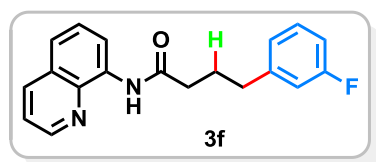

Following the general procedure, the desired product **3f** was isolated by preparative TLC on silica gel (eluent: DCM/EtOAc = 100/1) as a colorless oil (47.9 mg, 78%

yield). **<sup>1</sup>H NMR (400 MHz, CDCl<sub>3</sub>)** δ 9.79 (s, 1H), 8.84-8.74 (m, 2H), 8.14 (dd, *J* = 8.3, 1.6 Hz, 1H), 7.56-7.47 (m, 2H), 7.44 (dd, *J* = 8.3, 4.2 Hz, 1H), 7.24 (dt, *J* = 7.9, 5.8 Hz, 1H), 7.01 (d, *J* = 7.6 Hz, 1H), 6.95 (d, *J* = 10.0 Hz, 1H), 6.89 (td, *J* = 8.4, 2.4 Hz, 1H), 2.76 (t, *J* = 7.6 Hz, 2H), 2.57 (t, *J* = 7.4 Hz, 2H), 2.19-2.10 (m, 2H); **<sup>13</sup>C NMR (100 MHz, CDCl<sub>3</sub>)** δ 171.1, 162.9 (d, *J* = 243.9 Hz), 148.1, 144.1 (d, *J* = 7.1 Hz), 138.3, 136.3, 134.4, 129.8 (d, *J* = 8.3 Hz), 127.9, 127.4, 124.2 (d, *J* = 2.7 Hz), 121.6, 121.1, 116.4, 115.4 (d, *J* = 20.7 Hz), 112.8 (d, *J* = 20.9 Hz), 37.1, 34.8 (d, *J* = 1.6 Hz), 26.7; **<sup>19</sup>F NMR (376 MHz, CDCl<sub>3</sub>)** δ -113.71.

***N*-(quinolin-8-yl)-4-(*m*-tolyl)butanamide (3g)<sup>4a</sup>**

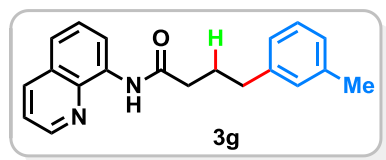

Following the general procedure, the desired product **3g** was isolated by preparative TLC on silica gel (eluent: DCM/EtOAc = 100/1) as an off-white solid (39.4 mg, 65% yield). **<sup>1</sup>H NMR (400 MHz, CDCl<sub>3</sub>)** δ 9.79 (s, 1H), 8.82-8.76 (m, 2H), 8.15 (dd, *J* = 8.3, 1.6 Hz, 1H), 7.56-7.47 (m, 2H), 7.44 (dd, *J* = 8.3, 4.2 Hz, 1H), 7.19 (t, *J* = 7.5 Hz, 1H), 7.07-6.99 (m, 3H), 2.73 (t, *J* = 7.5 Hz, 2H), 2.57 (t, *J* = 7.5 Hz, 2H), 2.32 (s, 3H), 2.20-2.11 (m, 2H); **<sup>13</sup>C NMR (100 MHz, CDCl<sub>3</sub>)** δ 171.5, 148.1, 141.4, 138.3, 137.9, 136.3, 134.5, 129.4, 128.3, 127.9, 127.4, 126.7, 125.6, 121.5, 121.3, 116.4, 37.3, 35.1, 27.0, 21.4.

**4-(3-methoxyphenyl)-*N*-(quinolin-8-yl)butanamide (3h)<sup>4c</sup>**

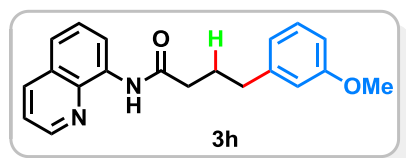

Following the general procedure, the desired product **3h** was isolated by preparative TLC on silica gel (eluent: PE/EtOAc = 9/1) as a yellow oil (48.8 mg, 76% yield). **<sup>1</sup>H NMR (400 MHz, CDCl<sub>3</sub>)** δ 9.79 (s, 1H), 8.80-8.77 (m, 2H), 8.14 (dd, *J* = 8.3, 1.6 Hz, 1H), 7.56-7.46 (m, 2H), 7.44 (dd, *J* = 8.3, 4.2 Hz, 1H), 7.21 (t, *J* = 7.8 Hz, 1H),

6.86-6.78 (m, 2H), 6.75 (dd,  $J = 8.2, 2.4$  Hz, 1H), 3.78 (s, 3H), 2.75 (t,  $J = 7.5$  Hz, 2H), 2.57 (t,  $J = 7.5$  Hz, 2H), 2.20-2.10 (m, 2H);  $^{13}\text{C}$  NMR (100 MHz,  $\text{CDCl}_3$ )  $\delta$  171.4, 159.7, 148.1, 143.1, 138.3, 136.3, 134.5, 129.3, 127.9, 127.4, 121.5, 121.4, 121.0, 116.4, 114.2, 111.4, 55.1, 37.2, 35.2, 26.9.

***N*-(quinolin-8-yl)-4-(3-(trifluoromethyl)phenyl)butanamide (3i)<sup>4a</sup>**

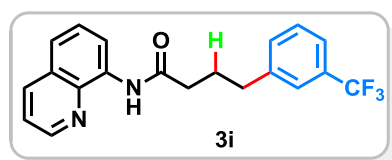

Following the general procedure, the desired product **3i** was isolated by preparative TLC on silica gel (eluent: DCM/EtOAc = 100/1) as a white solid (51.9 mg, 72% yield).  $^1\text{H}$  NMR (400 MHz,  $\text{CDCl}_3$ )  $\delta$  9.81 (s, 1H), 8.83-8.74 (m, 2H), 8.15 (dd,  $J = 8.3, 1.4$  Hz, 1H), 7.57-7.48 (m, 3H), 7.47-7.37 (m, 4H), 2.86-2.79 (m, 2H), 2.59 (t,  $J = 7.3$  Hz, 2H), 2.22-2.13 (m, 2H);  $^{13}\text{C}$  NMR (100 MHz,  $\text{CDCl}_3$ )  $\delta$  171.0, 148.1, 142.4, 138.3, 136.4, 134.4, 131.9, 130.7 (d,  $J = 31.7$  Hz), 128.8, 127.9, 127.4, 125.6, 125.2 (q,  $J = 3.9$  Hz), 122.9 (q,  $J = 3.9$  Hz), 121.6, 121.5, 116.5, 37.1, 35.0, 26.8;  $^{19}\text{F}$  NMR (376 MHz,  $\text{CDCl}_3$ )  $\delta$  -62.54.

**4-(4-fluorophenyl)-*N*-(quinolin-8-yl)butanamide (3j)<sup>4a</sup>**

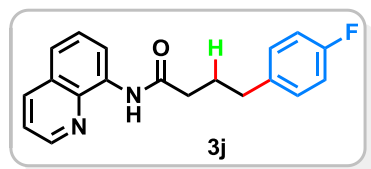

Following the general procedure, the desired product **3j** was isolated by preparative TLC on silica gel (eluent: DCM/EtOAc = 100/1) as a yellow oil (48.8 mg, 76% yield).  $^1\text{H}$  NMR (400 MHz,  $\text{CDCl}_3$ )  $\delta$  9.78 (s, 1H), 8.82-8.75 (m, 2H), 8.15 (dd,  $J = 8.3, 1.6$  Hz, 1H), 7.56-7.47 (m, 2H), 7.44 (dd,  $J = 8.3, 4.2$  Hz, 1H), 7.21-7.15 (m, 2H), 7.00-6.93 (m, 2H), 2.73 (t,  $J = 7.6$  Hz, 2H), 2.56 (t,  $J = 7.4$  Hz, 2H), 2.17-2.08 (m, 2H);  $^{13}\text{C}$  NMR (100 MHz,  $\text{CDCl}_3$ )  $\delta$  171.2, 161.3 (d,  $J = 242.0$  Hz), 148.1, 138.3, 137.1 (d,  $J = 3.1$  Hz), 136.3, 134.4, 129.8 (d,  $J = 7.7$  Hz), 127.9, 127.4, 121.5 (d,  $J = 15.4$  Hz), 116.4, 115.2, 115.0, 37.1, 34.3, 27.1;  $^{19}\text{F}$  NMR (376 MHz,  $\text{CDCl}_3$ )  $\delta$

-117.56.

**4-(4-chlorophenyl)-*N*-(quinolin-8-yl)butanamide (3k)<sup>4b</sup>**

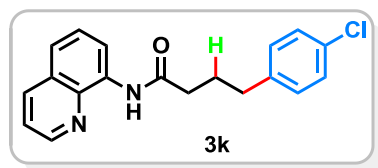

Following the general procedure, the desired product **3k** was isolated by preparative TLC on silica gel (eluent: DCM/EtOAc = 50/1) as a white solid (49.6 mg, 76% yield). <sup>1</sup>H NMR (400 MHz, CDCl<sub>3</sub>) δ 9.80 (s, 1H), 8.85-8.78 (m, 2H), 8.18 (dd, *J* = 8.3, 1.6 Hz, 1H), 7.59-7.50 (m, 2H), 7.47 (dd, *J* = 8.3, 4.2 Hz, 1H), 7.30-7.25 (m, 2H), 7.21-7.17 (m, 2H), 2.79-2.73 (m, 2H), 2.59 (t, *J* = 7.4 Hz, 2H), 2.20-2.11 (m, 2H); <sup>13</sup>C NMR (100 MHz, CDCl<sub>3</sub>) δ 171.4, 148.1, 139.9, 138.3, 136.4, 134.4, 131.7, 129.9, 128.5, 127.9, 127.4, 121.6, 121.4, 116.4, 37.1, 34.5, 26.9.

***N*-(quinolin-8-yl)-4-(*p*-tolyl)butanamide (3l)<sup>4a</sup>**

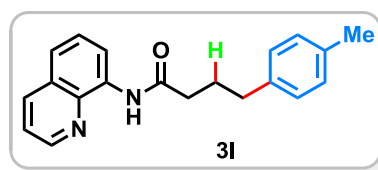

Following the general procedure, the desired product **3l** was isolated by preparative TLC on silica gel (eluent: DCM/EtOAc = 100/1) as an off-white solid (43.6 mg, 72% yield). <sup>1</sup>H NMR (400 MHz, CDCl<sub>3</sub>) δ 9.78 (s, 1H), 8.82-8.75 (m, 2H), 8.14 (dd, *J* = 8.3, 1.7 Hz, 1H), 7.56-7.47 (m, 2H), 7.44 (dd, *J* = 8.3, 4.2 Hz, 1H), 7.15-7.08 (m, 4H), 2.73 (t, *J* = 7.5 Hz, 2H), 2.56 (t, *J* = 7.5 Hz, 2H), 2.31 (s, 3H), 2.19-2.10 (m, 2H); <sup>13</sup>C NMR (100 MHz, CDCl<sub>3</sub>) δ 171.5, 148.1, 138.4, 138.3, 136.3, 135.4, 134.5, 129.1, 128.4, 127.9, 127.4, 121.5, 121.3, 116.4, 37.3, 34.7, 27.1, 21.0.

**4-(4-isopropylphenyl)-*N*-(quinolin-8-yl)butanamide (3m)**

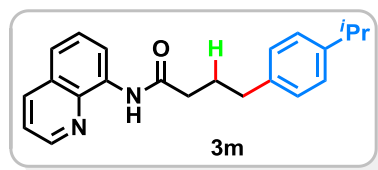

Following the general procedure, the desired product **3m** was isolated by preparative TLC on silica gel (eluent: DCM/EtOAc = 100/1) as a yellow oil (50.2 mg, 76% yield). **<sup>1</sup>H NMR (400 MHz, CDCl<sub>3</sub>)** δ 9.78 (s, 1H), 8.83-8.76 (m, 2H), 8.14 (dd, *J* = 8.3, 1.6 Hz, 1H), 7.56-7.46 (m, 2H), 7.44 (dd, *J* = 8.3, 4.2 Hz, 1H), 7.20-7.13 (m, 4H), 2.88 (hept, *J* = 6.9 Hz, 1H), 2.77-2.71 (m, 2H), 2.58 (t, *J* = 7.5 Hz, 2H), 2.20-2.10 (m, 2H), 1.24 (d, *J* = 6.9 Hz, 6H); **<sup>13</sup>C NMR (100 MHz, CDCl<sub>3</sub>)** δ 171.5, 148.1, 146.5, 138.7, 138.3, 136.3, 134.5, 128.5, 127.9, 127.4, 126.4, 121.5, 121.3, 116.4, 37.4, 34.8, 33.7, 27.0, 24.0; **HRMS *m/z* [M+H]<sup>+</sup>** calculated for C<sub>22</sub>H<sub>25</sub>N<sub>2</sub>O<sup>+</sup>: 333.1967, found: 333.1966.

#### 4-(4-butylphenyl)-*N*-(quinolin-8-yl)butanamide (**3n**)

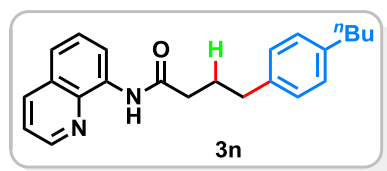

Following the general procedure, the desired product **3n** was isolated by preparative TLC on silica gel (eluent: DCM/EtOAc = 100/1) as a yellow oil (36.7 mg, 53% yield). **<sup>1</sup>H NMR (400 MHz, CDCl<sub>3</sub>)** δ 9.81 (s, 1H), 8.85-8.79 (m, 2H), 8.18 (dd, *J* = 8.3, 1.6 Hz, 1H), 7.59-7.50 (m, 2H), 7.47 (dd, *J* = 8.3, 4.2 Hz, 1H), 7.20-7.12 (m, 4H), 2.77 (t, *J* = 7.5 Hz, 2H), 2.60 (t, *J* = 7.5 Hz, 4H), 2.23-2.13 (m, 2H), 1.66-1.57 (m, 2H), 1.38 (dq, *J* = 14.6, 7.3 Hz, 2H), 0.95 (t, *J* = 7.3 Hz, 3H); **<sup>13</sup>C NMR (100 MHz, CDCl<sub>3</sub>)** δ 171.5, 148.1, 140.5, 138.6, 138.3, 136.3, 134.5, 128.4, 127.9, 127.4, 121.5, 121.3, 116.4, 37.4, 35.2, 34.8, 33.7, 27.1, 22.4, 13.9; **HRMS *m/z* [M+H]<sup>+</sup>** calculated for C<sub>23</sub>H<sub>27</sub>N<sub>2</sub>O<sup>+</sup>: 347.2123, found: 347.2121.

#### 4-(4-*tert*-butylphenyl)-*N*-(quinolin-8-yl)butanamide (**3o**)<sup>4a</sup>

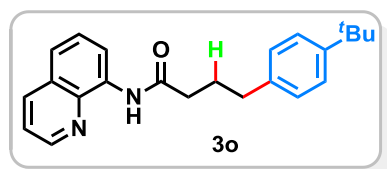

Following the general procedure, the desired product **3o** was isolated by preparative TLC on silica gel (eluent: DCM/EtOAc = 100/1) as a yellow oil (41.3 mg, 60% yield).

**<sup>1</sup>H NMR (400 MHz, CDCl<sub>3</sub>)** δ 9.78 (s, 1H), 8.82-8.75 (m, 2H), 8.14 (dd, *J* = 8.3, 1.6 Hz, 1H), 7.56-7.47 (m, 2H), 7.44 (dd, *J* = 8.3, 4.2 Hz, 1H), 7.34-7.29 (m, 2H), 7.20-7.15 (m, 2H), 2.74 (t, *J* = 7.5 Hz, 2H), 2.58 (t, *J* = 7.5 Hz, 2H), 2.20-2.11 (m, 2H), 1.31 (s, 9H); **<sup>13</sup>C NMR (100 MHz, CDCl<sub>3</sub>)** δ 171.5, 148.7, 148.1, 138.4, 138.3, 136.3, 134.5, 128.2, 127.9, 127.4, 125.3, 121.5, 121.3, 116.4, 37.4, 34.7, 34.3, 31.2, 27.0.

**4-([1,1'-biphenyl]-4-yl)-*N*-(quinolin-8-yl)butanamide (3p)<sup>4a</sup>**

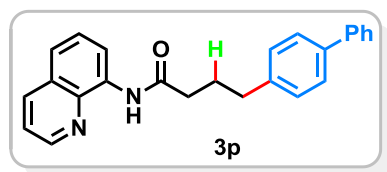

Following the general procedure, the desired product **3p** was isolated by preparative TLC on silica gel (eluent: DCM/EtOAc = 50/1) as a white solid (47.8 mg, 65% yield).

**<sup>1</sup>H NMR (400 MHz, CDCl<sub>3</sub>)** δ 9.80 (s, 1H), 8.82-8.75 (m, 2H), 8.13 (dd, *J* = 8.3, 1.6 Hz, 1H), 7.59-7.46 (m, 6H), 7.44-7.39 (m, 3H), 7.34-7.28 (m, 3H), 2.80 (t, *J* = 7.5 Hz, 2H), 2.60 (t, *J* = 7.4 Hz, 2H), 2.19 (p, *J* = 7.5 Hz, 2H); **<sup>13</sup>C NMR (100 MHz, CDCl<sub>3</sub>)** δ 171.3, 148.1, 141.0, 140.6, 138.9, 138.3, 136.3, 134.5, 129.0, 128.7, 127.9, 127.4, 127.1, 126.98, 126.95, 121.5, 121.4, 116.4, 37.3, 34.8, 26.9.

**4-(4-methoxyphenyl)-*N*-(quinolin-8-yl)butanamide (3q)<sup>4a</sup>**

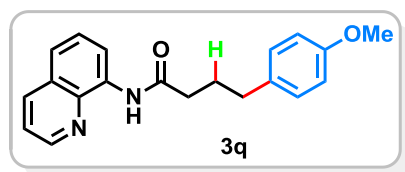

Following the general procedure, the desired product **3q** was isolated by preparative TLC on silica gel (eluent: PE/EtOAc = 9/1) as a yellow oil (48.2 mg, 75% yield).

**<sup>1</sup>H NMR (400 MHz, CDCl<sub>3</sub>)** δ 9.78 (s, 1H), 8.82-8.75 (m, 2H), 8.15 (dd, *J* = 8.3, 1.6 Hz, 1H), 7.56-7.47 (m, 2H), 7.44 (dd, *J* = 8.3, 4.2 Hz, 1H), 7.17-7.13 (m, 2H), 6.87-6.80 (m, 2H), 3.78 (s, 3H), 2.71 (t, *J* = 7.5 Hz, 2H), 2.56 (t, *J* = 7.5 Hz, 2H), 2.12 (p, *J* = 7.5 Hz, 2H); **<sup>13</sup>C NMR (100 MHz, CDCl<sub>3</sub>)** δ 171.5, 157.9, 148.1, 138.3, 136.3, 134.5, 133.5, 129.4, 127.9, 127.4, 121.5, 121.3, 116.4, 113.8, 55.2, 37.3, 34.3, 27.2.

#### 4-(4-(methylthio)phenyl)-*N*-(quinolin-8-yl)butanamide (**3r**)<sup>4d</sup>

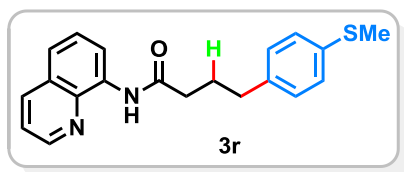

Following the general procedure, the desired product **3r** was isolated by preparative TLC on silica gel (eluent: PE/EtOAc = 9/1) as a yellow oil (30.9 mg, 46% yield). <sup>1</sup>H NMR (400 MHz, CDCl<sub>3</sub>) δ 9.78 (s, 1H), 8.82-8.74 (m, 2H), 8.16 (dd, *J* = 8.3, 1.5 Hz, 1H), 7.57-7.48 (m, 2H), 7.46 (dd, *J* = 8.3, 4.2 Hz, 1H), 7.23-7.15 (m, 5H), 2.73 (t, *J* = 7.5 Hz, 2H), 2.57 (t, *J* = 7.4 Hz, 2H), 2.47 (s, 3H), 2.14 (p, *J* = 7.5 Hz, 2H); <sup>13</sup>C NMR (100 MHz, CDCl<sub>3</sub>) δ 171.3, 148.1, 138.6, 138.4, 136.4, 135.5, 134.5, 129.1, 128.0, 127.4, 127.3, 121.6, 121.4, 116.5, 37.2, 34.6, 27.0, 16.3.

#### *N*-(quinolin-8-yl)-4-(4-(trifluoromethyl)phenyl)butanamide (**3s**)<sup>4a</sup>

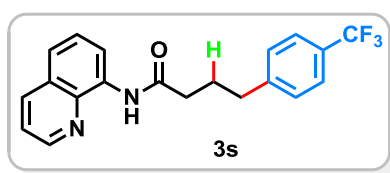

Following the general procedure, the desired product **3s** was isolated by preparative TLC on silica gel (eluent: DCM/EtOAc = 50/1) as an off-white solid (48.6 mg, 68% yield). <sup>1</sup>H NMR (400 MHz, CDCl<sub>3</sub>) δ 9.79 (s, 1H), 8.82-8.75 (m, 2H), 8.15 (dd, *J* = 8.3, 1.6 Hz, 1H), 7.58-7.48 (m, 4H), 7.45 (dd, *J* = 8.3, 4.2 Hz, 1H), 7.34 (d, *J* = 8.0 Hz, 2H), 2.82 (t, *J* = 7.6 Hz, 2H), 2.58 (t, *J* = 7.3 Hz, 2H), 2.22-2.12 (m, 2H); <sup>13</sup>C NMR (100 MHz, CDCl<sub>3</sub>) δ 171.0, 148.1, 145.6, 138.3, 136.4, 134.4, 128.8, 128.4 (d, *J* = 32.3 Hz), 127.9, 127.4, 125.3 (q, *J* = 3.8 Hz), 124.3 (d, *J* = 270.0 Hz), 121.6, 121.5, 116.5, 37.0, 34.9, 26.7; <sup>19</sup>F NMR (376 MHz, CDCl<sub>3</sub>) δ -62.32.

#### *N*-(quinolin-8-yl)-4-(4-(trifluoromethoxy)phenyl)butanamide (**3t**)<sup>4a</sup>

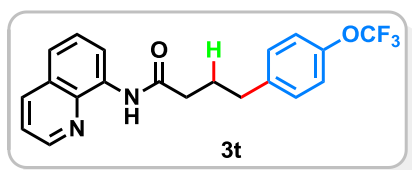

Following the general procedure, the desired product **3t** was isolated by preparative



TLC on silica gel (eluent: DCM/EtOAc = 50/1) as an off-white solid (56.0 mg, 75% yield). **<sup>1</sup>H NMR (400 MHz, CDCl<sub>3</sub>)** δ 9.82 (s, 1H), 8.85-8.78 (m, 2H), 8.18 (dd, *J* = 8.3, 1.6 Hz, 1H), 7.60-7.50 (m, 2H), 7.47 (dd, *J* = 8.3, 4.2 Hz, 1H), 7.30-7.25 (m, 2H), 7.19-7.13 (m, 2H), 2.83-2.77 (m, 2H), 2.60 (t, *J* = 7.4 Hz, 2H), 2.22-2.13 (m, 2H); **<sup>13</sup>C NMR (100 MHz, CDCl<sub>3</sub>)** δ 171.1, 148.1, 147.5, 140.2, 138.3, 136.4, 134.4, 129.8, 127.9, 127.4, 121.6, 121.5, 120.9, 120.5 (d, *J* = 255.0 Hz), 116.5, 37.1, 34.4, 26.9; **<sup>19</sup>F NMR (376 MHz, CDCl<sub>3</sub>)** δ -57.91.

***N*-(quinolin-8-yl)-4-(4-vinylphenyl)butanamide (3u)**

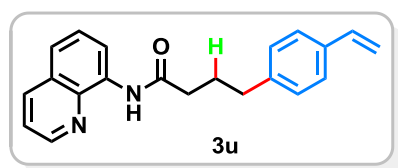

Following the general procedure, the desired product **3u** was isolated by preparative TLC on silica gel (eluent: DCM/EtOAc = 100/1) as a yellow oil (43.8 mg, 69% yield). **<sup>1</sup>H NMR (400 MHz, CDCl<sub>3</sub>)** δ 9.78 (s, 1H), 8.82-8.75 (m, 2H), 8.15 (dd, *J* = 8.3, 1.6 Hz, 1H), 7.57-7.47 (m, 2H), 7.44 (dd, *J* = 8.3, 4.2 Hz, 1H), 7.34 (d, *J* = 8.1 Hz, 2H), 7.20 (d, *J* = 8.1 Hz, 2H), 6.69 (dd, *J* = 17.6, 10.9 Hz, 1H), 5.70 (dd, *J* = 17.6, 0.8 Hz, 1H), 5.20 (d, *J* = 10.9 Hz, 1H), 2.76 (t, *J* = 7.5 Hz, 2H), 2.57 (t, *J* = 7.4 Hz, 2H), 2.21-2.10 (m, 2H); **<sup>13</sup>C NMR (100 MHz, CDCl<sub>3</sub>)** δ 171.3, 148.1, 141.2, 138.3, 136.6, 136.3, 135.4, 134.5, 128.7, 127.9, 127.4, 126.3, 121.5, 121.4, 116.4, 113.0, 37.2, 34.9, 26.9; **HRMS *m/z* [M+H]<sup>+</sup>** calculated for C<sub>21</sub>H<sub>21</sub>N<sub>2</sub>O<sup>+</sup>: 317.1654, found: 317.1650.

**4-(naphthalen-1-yl)-*N*-(quinolin-8-yl)butanamide (3v)<sup>4a</sup>**

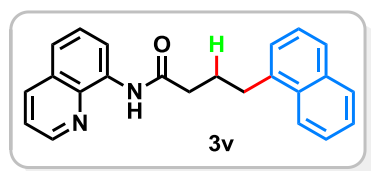

Following the general procedure, the desired product **3v** was isolated by preparative TLC on silica gel (eluent: DCM/EtOAc = 50/1) as an off-white solid (53.3 mg, 78% yield). **<sup>1</sup>H NMR (400 MHz, CDCl<sub>3</sub>)** δ 9.79 (s, 1H), 8.84-8.74 (m, 2H), 8.15-8.07 (m, 2H), 7.86-7.81 (m, 1H), 7.71 (dt, *J* = 7.0, 3.6 Hz, 1H), 7.55-7.44 (m, 4H), 7.44-7.35

(m, 3H), 3.26-3.18 (m, 2H), 2.64 (t,  $J = 7.3$  Hz, 2H), 2.33-2.23 (m, 2H);  $^{13}\text{C}$  NMR (100 MHz,  $\text{CDCl}_3$ )  $\delta$  171.3, 148.1, 138.3, 137.6, 136.3, 134.5, 133.9, 131.9, 128.7, 127.9, 127.4, 126.8, 126.2, 125.8, 125.5, 125.4, 123.8, 121.5, 121.4, 116.5, 37.5, 32.3, 26.3.

**4-(naphthalen-2-yl)-*N*-(quinolin-8-yl)butanamide (3w)<sup>4a</sup>**

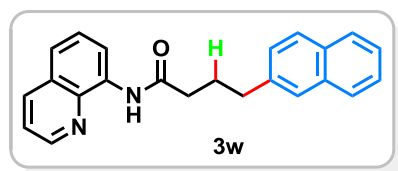

Following the general procedure, the desired product **3w** was isolated by preparative TLC on silica gel (eluent: DCM/EtOAc = 50/1) as an off-white solid (42.6 mg, 63% yield).  $^1\text{H}$  NMR (400 MHz,  $\text{CDCl}_3$ )  $\delta$  9.83 (s, 1H), 8.87-8.77 (m, 2H), 8.17 (dd,  $J = 8.3, 1.6$  Hz, 1H), 7.86-7.77 (m, 3H), 7.71 (s, 1H), 7.60-7.41 (m, 6H), 2.97 (t,  $J = 7.5$  Hz, 2H), 2.64 (t,  $J = 7.4$  Hz, 2H), 2.29 (p,  $J = 7.4$  Hz, 2H);  $^{13}\text{C}$  NMR (100 MHz,  $\text{CDCl}_3$ )  $\delta$  171.4, 148.1, 139.0, 138.3, 136.3, 134.5, 133.6, 132.1, 128.0, 127.9, 127.6, 127.44, 127.40, 127.3, 126.7, 125.9, 125.2, 121.5, 121.4, 116.4, 37.2, 35.3, 26.8.

**4-(benzo[d][1,3]dioxol-5-yl)-*N*-(quinolin-8-yl)butanamide (3x)<sup>4b</sup>**

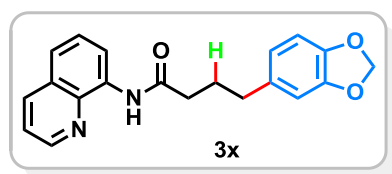

Following the general procedure, the desired product **3x** was isolated by preparative TLC on silica gel (eluent: PE/EtOAc = 5/1) as a yellow oil (41.7 mg, 62% yield).  $^1\text{H}$  NMR (400 MHz,  $\text{CDCl}_3$ )  $\delta$  9.78 (s, 1H), 8.83-8.75 (m, 2H), 8.14 (dd,  $J = 8.3, 1.6$  Hz, 1H), 7.56-7.46 (m, 2H), 7.44 (dd,  $J = 8.3, 4.2$  Hz, 1H), 6.76-6.70 (m, 2H), 6.67 (dd,  $J = 7.9, 1.6$  Hz, 1H), 5.90 (s, 2H), 2.68 (t,  $J = 7.5$  Hz, 2H), 2.55 (t,  $J = 7.4$  Hz, 2H), 2.11 (p,  $J = 7.5$  Hz, 2H);  $^{13}\text{C}$  NMR (100 MHz,  $\text{CDCl}_3$ )  $\delta$  171.4, 148.1, 147.6, 145.7, 138.3, 136.3, 135.3, 134.5, 127.9, 127.4, 121.5, 121.34, 121.30, 116.4, 109.0, 108.1, 100.7, 37.1, 34.9, 27.2.

**4-(2,3-dihydrobenzo[b][1,4]dioxin-6-yl)-*N*-(quinolin-8-yl)butanamide (3y)**

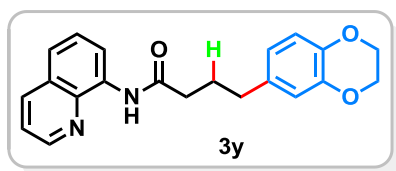

Following the general procedure, the desired product **3y** was isolated by preparative TLC on silica gel (eluent: PE/EtOAc = 5/1) as a yellow oil (40.9 mg, 59% yield). **<sup>1</sup>H NMR (400 MHz, CDCl<sub>3</sub>)** δ 9.78 (s, 1H), 8.82-8.74 (m, 2H), 8.15 (dd, *J* = 8.3, 1.7 Hz, 1H), 7.56-7.47 (m, 2H), 7.44 (dd, *J* = 8.3, 4.2 Hz, 1H), 6.80-6.75 (m, 2H), 6.70 (dd, *J* = 8.2, 2.0 Hz, 1H), 4.23 (s, 4H), 2.66 (t, *J* = 7.5 Hz, 2H), 2.56 (t, *J* = 7.5 Hz, 2H), 2.16-2.07 (m, 2H); **<sup>13</sup>C NMR (100 MHz, CDCl<sub>3</sub>)** δ 171.4, 148.1, 143.3, 141.8, 138.3, 136.3, 134.8, 134.5, 127.9, 127.4, 121.53, 121.47, 121.3, 117.1, 117.0, 116.4, 64.4, 64.3, 37.2, 34.4, 27.1; **HRMS *m/z* [M+H]<sup>+</sup>** calculated for C<sub>21</sub>H<sub>21</sub>N<sub>2</sub>O<sub>3</sub><sup>+</sup>: 349.1552, found: 349.1543.

#### 4-(2,3-dimethylphenyl)-*N*-(quinolin-8-yl)butanamide (**3z**)

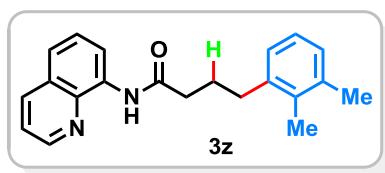

Following the general procedure, the desired product **3z** was isolated by preparative TLC on silica gel (eluent: DCM/EtOAc = 100/1) as a colorless oil (42.6 mg, 67% yield). **<sup>1</sup>H NMR (400 MHz, CDCl<sub>3</sub>)** δ 9.80 (s, 1H), 8.82-8.76 (m, 2H), 8.14 (dd, *J* = 8.3, 1.6 Hz, 1H), 7.56-7.46 (m, 2H), 7.43 (dd, *J* = 8.3, 4.2 Hz, 1H), 7.07-6.99 (m, 3H), 2.81-2.74 (m, 2H), 2.61 (t, *J* = 7.4 Hz, 2H), 2.27 (s, 3H), 2.24 (s, 3H), 2.14-2.05 (m, 2H); **<sup>13</sup>C NMR (100 MHz, CDCl<sub>3</sub>)** δ 171.4, 148.1, 139.6, 138.3, 136.9, 136.3, 134.6, 134.5, 127.9, 127.8, 127.4, 127.1, 125.3, 121.5, 121.3, 116.4, 37.6, 33.4, 26.1, 20.7, 15.0; **HRMS *m/z* [M+H]<sup>+</sup>** calculated for C<sub>21</sub>H<sub>23</sub>N<sub>2</sub>O<sup>+</sup>: 319.1810, found: 319.1811.

#### 4-(3-fluoro-2-methylphenyl)-*N*-(quinolin-8-yl)butanamide (**3aa**)<sup>4d</sup>

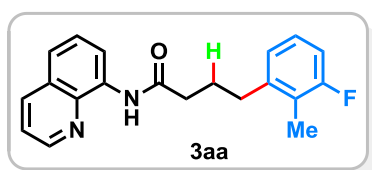

Following the general procedure, the desired product **3aa** was isolated by preparative TLC on silica gel (eluent: DCM/EtOAc = 100/1) as a colorless oil (55.0 mg, 85% yield). **<sup>1</sup>H NMR (400 MHz, CDCl<sub>3</sub>)** δ 9.79 (s, 1H), 8.82-8.75 (m, 2H), 8.14 (dd, *J* = 8.3, 1.6 Hz, 1H), 7.56-7.46 (m, 2H), 7.44 (dd, *J* = 8.3, 4.2 Hz, 1H), 7.12-7.03 (m, 1H), 6.97 (d, *J* = 7.4 Hz, 1H), 6.87 (t, *J* = 8.9 Hz, 1H), 2.80-2.73 (m, 2H), 2.61 (t, *J* = 7.3 Hz, 2H), 2.24 (d, *J* = 2.2 Hz, 3H), 2.14-2.04 (m, 2H); **<sup>13</sup>C NMR (100 MHz, CDCl<sub>3</sub>)** δ 171.1, 161.5 (d, *J* = 241.5 Hz), 148.1, 142.2 (d, *J* = 3.9 Hz), 138.3, 136.3, 134.4, 127.9, 127.4, 126.4 (d, *J* = 9.0 Hz), 124.5 (d, *J* = 2.9 Hz), 123.1 (d, *J* = 15.7 Hz), 121.5, 121.4, 116.4, 112.7 (d, *J* = 23.2 Hz), 37.3, 32.5 (d, *J* = 2.7 Hz), 25.8, 10.4 (d, *J* = 5.9 Hz); **<sup>19</sup>F NMR (376 MHz, CDCl<sub>3</sub>)** δ -116.49.

#### 4-(2,4-dimethylphenyl)-*N*-(quinolin-8-yl)butanamide (**3ab**)

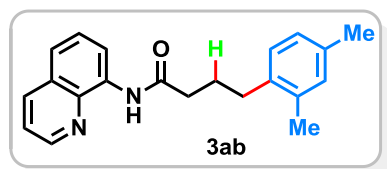

Following the general procedure, the desired product **3ab** was isolated by preparative TLC on silica gel (eluent: DCM/EtOAc = 100/1) as a colorless oil (42.4 mg, 67% yield). **<sup>1</sup>H NMR (400 MHz, CDCl<sub>3</sub>)** δ 9.79 (s, 1H), 8.82-8.75 (m, 2H), 8.14 (dd, *J* = 8.3, 1.7 Hz, 1H), 7.55-7.46 (m, 2H), 7.43 (dd, *J* = 8.3, 4.2 Hz, 1H), 7.08 (d, *J* = 7.5 Hz, 1H), 6.98-6.92 (m, 2H), 2.75-2.68 (m, 2H), 2.61 (t, *J* = 7.4 Hz, 2H), 2.30 (s, 3H), 2.28 (s, 3H), 2.14-2.05 (m, 2H); **<sup>13</sup>C NMR (100 MHz, CDCl<sub>3</sub>)** δ 171.4, 148.1, 138.3, 136.6, 136.3, 135.8, 135.5, 134.5, 131.0, 129.0, 127.9, 127.4, 126.5, 121.5, 121.3, 116.4, 37.6, 32.2, 25.9, 20.8, 19.2; **HRMS *m/z* [M+H]<sup>+</sup>** calculated for C<sub>21</sub>H<sub>23</sub>N<sub>2</sub>O<sup>+</sup>: 319.1810, found: 319.1811.

#### 4-(4-methoxy-2-methylphenyl)-*N*-(quinolin-8-yl)butanamide (**3ac**)

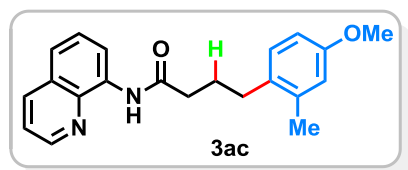

Following the general procedure with **2ac** (3.0 equiv), the desired product **3ac** was

isolated by preparative TLC on silica gel (eluent: PE/EtOAc = 9/1) as a pale yellow oil (42.0 mg, 63% yield). **<sup>1</sup>H NMR (400 MHz, CDCl<sub>3</sub>)** δ 9.79 (s, 1H), 8.82-8.75 (m, 2H), 8.15 (dd, *J* = 8.3, 1.6 Hz, 1H), 7.56-7.47 (m, 2H), 7.44 (dd, *J* = 8.3, 4.2 Hz, 1H), 7.10 (d, *J* = 8.2 Hz, 1H), 6.72-6.66 (m, 2H), 3.76 (s, 3H), 2.74-2.66 (m, 2H), 2.60 (t, *J* = 7.4 Hz, 2H), 2.31 (s, 3H), 2.12-2.03 (m, 2H); **<sup>13</sup>C NMR (100 MHz, CDCl<sub>3</sub>)** δ 171.4, 157.8, 148.1, 138.3, 137.3, 136.3, 134.5, 131.9, 129.9, 127.9, 127.4, 121.5, 121.3, 116.4, 115.9, 111.0, 55.2, 37.6, 31.8, 26.1, 19.6; **HRMS *m/z* [M+H]<sup>+</sup>** calculated for C<sub>21</sub>H<sub>23</sub>N<sub>2</sub>O<sub>2</sub><sup>+</sup>: 335.1760, found: 335.1757.

#### 4-(5-fluoro-2-methylphenyl)-N-(quinolin-8-yl)butanamide (3ad)

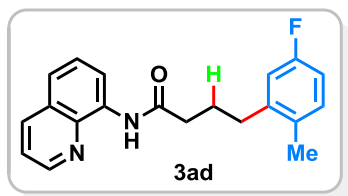

Following the general procedure, the desired product **3ad** was isolated by preparative TLC on silica gel (eluent: DCM/EtOAc = 100/1) as a colorless oil (44.0 mg, 68% yield). **<sup>1</sup>H NMR (400 MHz, CDCl<sub>3</sub>)** δ 9.81 (s, 1H), 8.82-8.75 (m, 2H), 8.14 (dd, *J* = 8.3, 1.6 Hz, 1H), 7.57-7.47 (m, 2H), 7.44 (dd, *J* = 8.3, 4.2 Hz, 1H), 7.06 (dd, *J* = 8.3, 6.0 Hz, 1H), 6.92 (dd, *J* = 9.9, 2.7 Hz, 1H), 6.79 (td, *J* = 8.4, 2.8 Hz, 1H), 2.75-2.68 (m, 2H), 2.62 (t, *J* = 7.3 Hz, 2H), 2.27 (s, 3H), 2.14-2.05 (m, 2H); **<sup>13</sup>C NMR (100 MHz, CDCl<sub>3</sub>)** δ 171.1, 162.3 (d, *J* = 241.4 Hz), 148.1, 141.7 (d, *J* = 6.8 Hz), 138.3, 136.3, 134.4, 131.5 (d, *J* = 3.1 Hz), 131.3 (d, *J* = 7.8 Hz), 127.9, 127.4, 121.6, 121.4, 116.4, 115.4 (d, *J* = 20.7 Hz), 112.5 (d, *J* = 20.5 Hz), 37.3, 32.6 (d, *J* = 1.4 Hz), 25.4, 18.5; **<sup>19</sup>F NMR (376 MHz, CDCl<sub>3</sub>)** δ -118.05; **HRMS *m/z* [M+H]<sup>+</sup>** calculated for C<sub>20</sub>H<sub>20</sub>FN<sub>2</sub>O<sup>+</sup>: 323.1560, found: 323.1563.

#### 4-(2,5-dimethylphenyl)-N-(quinolin-8-yl)butanamide (3ae)

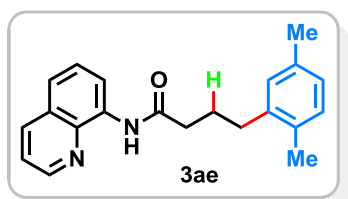

Following the general procedure, the desired product **3ae** was isolated by preparative

TLC on silica gel (eluent: DCM/EtOAc = 100/1) as a colorless oil (44.6 mg, 70% yield). **<sup>1</sup>H NMR (400 MHz, CDCl<sub>3</sub>)** δ 9.81 (s, 1H), 8.83-8.75 (m, 2H), 8.14 (dd, *J* = 8.3, 1.6 Hz, 1H), 7.56-7.46 (m, 2H), 7.43 (dd, *J* = 8.3, 4.2 Hz, 1H), 7.05-6.99 (m, 2H), 6.92 (dd, *J* = 7.6, 1.4 Hz, 1H), 2.75-2.68 (m, 2H), 2.62 (t, *J* = 7.4 Hz, 2H), 2.29 (s, 6H), 2.14-2.06 (m, 2H); **<sup>13</sup>C NMR (100 MHz, CDCl<sub>3</sub>)** δ 171.4, 148.1, 139.5, 138.3, 136.3, 135.3, 134.5, 132.8, 130.1, 129.8, 127.9, 127.4, 126.7, 121.5, 121.3, 116.5, 37.6, 32.6, 25.8, 20.9, 18.8; **HRMS *m/z* [M+H]<sup>+</sup>** calculated for C<sub>21</sub>H<sub>23</sub>N<sub>2</sub>O<sup>+</sup>: 319.1810, found: 319.1812.

#### 4-(4-fluoro-3-methylphenyl)-*N*-(quinolin-8-yl)butanamide (**3af**)

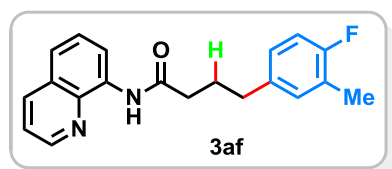

Following the general procedure, the desired product **3af** was isolated by preparative TLC on silica gel (eluent: DCM/EtOAc = 100/1) as a colorless oil (52.2 mg, 81% yield). **<sup>1</sup>H NMR (400 MHz, CDCl<sub>3</sub>)** δ 9.78 (s, 1H), 8.82-8.75 (m, 2H), 8.15 (dd, *J* = 8.3, 1.6 Hz, 1H), 7.57-7.47 (m, 2H), 7.44 (dd, *J* = 8.3, 4.2 Hz, 1H), 7.06-6.96 (m, 2H), 6.94-6.87 (m, 1H), 2.69 (t, *J* = 7.5 Hz, 2H), 2.55 (t, *J* = 7.4 Hz, 2H), 2.23 (d, *J* = 1.8 Hz, 3H), 2.16-2.07 (m, 2H); **<sup>13</sup>C NMR (100 MHz, CDCl<sub>3</sub>)** δ 171.3, 159.9 (d, *J* = 240.9 Hz), 148.1, 138.3, 136.8 (d, *J* = 3.6 Hz), 136.3, 134.5, 131.4 (d, *J* = 4.9 Hz), 127.9, 127.4, 127.1 (d, *J* = 7.7 Hz), 124.5 (d, *J* = 17.0 Hz), 121.5, 121.4, 116.4, 114.7 (d, *J* = 22.0 Hz), 37.1, 34.3, 27.1, 14.5 (d, *J* = 3.4 Hz); **<sup>19</sup>F NMR (376 MHz, CDCl<sub>3</sub>)** δ -121.99; **HRMS *m/z* [M+H]<sup>+</sup>** calculated for C<sub>20</sub>H<sub>20</sub>FN<sub>2</sub>O<sup>+</sup>: 323.1560, found: 323.1562.

#### 4-(4-chloro-3-methylphenyl)-*N*-(quinolin-8-yl)butanamide (**3ag**)

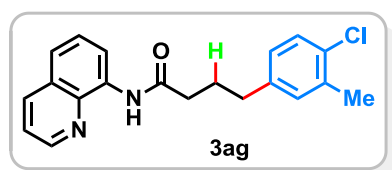

Following the general procedure, the desired product **3ag** was isolated by preparative

TLC on silica gel (eluent: DCM/EtOAc = 50/1) as a pale yellow oil (54.1 mg, 80% yield). **<sup>1</sup>H NMR (400 MHz, CDCl<sub>3</sub>)** δ 9.77 (s, 1H), 8.82-8.74 (m, 2H), 8.14 (dd, *J* = 8.3, 1.6 Hz, 1H), 7.56-7.46 (m, 2H), 7.44 (dd, *J* = 8.3, 4.2 Hz, 1H), 7.23 (d, *J* = 8.1 Hz, 1H), 7.09 (d, *J* = 1.6 Hz, 1H), 6.99 (dd, *J* = 8.1, 2.0 Hz, 1H), 2.69 (t, *J* = 7.5 Hz, 2H), 2.55 (t, *J* = 7.4 Hz, 2H), 2.32 (s, 3H), 2.17-2.07 (m, 2H); **<sup>13</sup>C NMR (100 MHz, CDCl<sub>3</sub>)** δ 171.2, 148.1, 140.0, 138.3, 136.3, 135.8, 134.4, 131.8, 131.2, 128.9, 127.9, 127.4, 127.3, 121.5, 121.4, 116.4, 113.8, 37.1, 34.4, 26.9, 19.9; **HRMS *m/z* [M+H]<sup>+</sup>** calculated for C<sub>20</sub>H<sub>20</sub>ClN<sub>2</sub>O<sup>+</sup>: 339.1264, found: 339.1261.

#### 4-(4-methoxy-3-methylphenyl)-*N*-(quinolin-8-yl)butanamide (3ah)

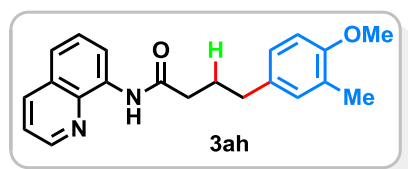

Following the general procedure with **2ah** (3.0 equiv), the desired product **3ah** was isolated by preparative TLC on silica gel (eluent: PE/EtOAc = 9/1) as a yellow oil (35.3 mg, 53% yield). **<sup>1</sup>H NMR (400 MHz, CDCl<sub>3</sub>)** δ 9.78 (s, 1H), 8.83-8.76 (m, 2H), 8.15 (dd, *J* = 8.3, 1.6 Hz, 1H), 7.57-7.47 (m, 2H), 7.44 (dd, *J* = 8.3, 4.2 Hz, 1H), 7.04-6.99 (m, 2H), 6.75 (d, *J* = 8.5 Hz, 1H), 3.80 (s, 3H), 2.68 (t, *J* = 7.5 Hz, 2H), 2.56 (t, *J* = 7.5 Hz, 2H), 2.19 (s, 3H), 2.17-2.08 (m, 2H); **<sup>13</sup>C NMR (100 MHz, CDCl<sub>3</sub>)** δ 171.6, 156.1, 148.1, 138.4, 136.3, 134.6, 133.1, 130.9, 127.9, 127.4, 126.54, 126.46, 121.5, 121.3, 116.4, 110.0, 55.4, 37.3, 34.3, 16.2; **HRMS *m/z* [M+H]<sup>+</sup>** calculated for C<sub>21</sub>H<sub>23</sub>N<sub>2</sub>O<sub>2</sub><sup>+</sup>: 335.1760, found: 335.1750.

#### 4-(4-fluoro-2-methoxyphenyl)-*N*-(quinolin-8-yl)butanamide (3ai)

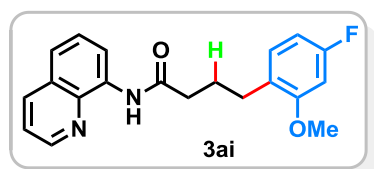

Following the general procedure, the desired product **3ai** was isolated by preparative TLC on silica gel (eluent: PE/EtOAc = 9/1) as a yellow oil (53.7 mg, 79% yield). **<sup>1</sup>H NMR (400 MHz, CDCl<sub>3</sub>)** δ 9.78 (s, 1H), 8.83-8.74 (m, 2H), 8.14 (dd, *J* = 8.3, 1.6 Hz,

1H), 7.56-7.46 (m, 2H), 7.44 (dd,  $J = 8.3, 4.2$  Hz, 1H), 7.10 (t,  $J = 7.4$  Hz, 1H), 6.62-6.53 (m, 2H), 3.77 (s, 3H), 2.71 (t,  $J = 7.4$  Hz, 2H), 2.56 (t,  $J = 7.5$  Hz, 2H), 2.15-2.04 (m, 2H);  $^{13}\text{C}$  NMR (100 MHz,  $\text{CDCl}_3$ )  $\delta$  171.6, 162.2 (d,  $J = 241.6$  Hz), 158.4 (d,  $J = 9.5$  Hz), 148.0, 138.3, 136.3, 134.5, 130.4 (d,  $J = 9.7$  Hz), 127.9, 127.4, 125.4 (d,  $J = 3.2$  Hz), 121.5, 121.3, 116.4, 106.3 (d,  $J = 20.6$  Hz), 98.7 (d,  $J = 25.4$  Hz), 55.4, 37.5, 29.0, 25.6;  $^{19}\text{F}$  NMR (376 MHz,  $\text{CDCl}_3$ )  $\delta$  -114.46; HRMS  $m/z$   $[\text{M}+\text{H}]^+$  calculated for  $\text{C}_{20}\text{H}_{20}\text{FN}_2\text{O}_2^+$ : 339.1509, found: 339.1506.

#### 4-(2,4-dimethoxyphenyl)-*N*-(quinolin-8-yl)butanamide (3aj)

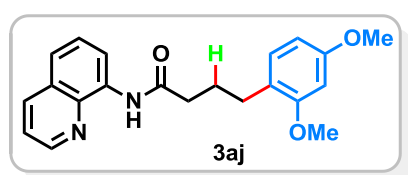

Following the general procedure, the desired product **3aj** was isolated by preparative TLC on silica gel (eluent: PE/EtOAc = 5/1) as a yellow oil (37.2 mg, 53% yield).  $^1\text{H}$  NMR (400 MHz,  $\text{CDCl}_3$ )  $\delta$  9.78 (s, 1H), 8.82-8.76 (m, 2H), 8.14 (dd,  $J = 8.3, 1.6$  Hz, 1H), 7.55-7.46 (m, 2H), 7.44 (dd,  $J = 8.3, 4.2$  Hz, 1H), 7.08 (d,  $J = 8.0$  Hz, 1H), 6.45-6.39 (m, 2H), 3.78 (s, 3H), 3.77 (s, 3H), 2.70 (t,  $J = 7.4$  Hz, 2H), 2.59-2.52 (m, 2H), 2.14-2.05 (m, 2H);  $^{13}\text{C}$  NMR (100 MHz,  $\text{CDCl}_3$ )  $\delta$  171.8, 159.3, 158.4, 148.0, 138.3, 136.3, 134.6, 130.3, 127.9, 127.4, 122.3, 121.5, 121.2, 116.4, 103.8, 98.5, 55.3, 55.2, 37.6, 29.0, 25.8; HRMS  $m/z$   $[\text{M}+\text{H}]^+$  calculated for  $\text{C}_{21}\text{H}_{23}\text{N}_2\text{O}_3^+$ : 351.1709, found: 351.1707.

#### 4-(3,4-dimethoxyphenyl)-*N*-(quinolin-8-yl)butanamide (3ak)

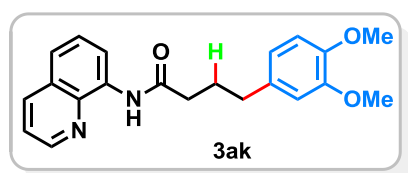

Following the general procedure with **2ak** (3.0 equiv), the desired product **3ak** was isolated by preparative TLC on silica gel (eluent: PE/EtOAc = 5/1) as a yellow oil (41.5 mg, 59% yield).  $^1\text{H}$  NMR (400 MHz,  $\text{CDCl}_3$ )  $\delta$  9.78 (s, 1H), 8.82-8.75 (m, 2H), 8.16 (dd,  $J = 8.3, 1.6$  Hz, 1H), 7.57-7.48 (m, 2H), 7.45 (dd,  $J = 8.3, 4.2$  Hz, 1H),



6.82-6.75 (m, 3H), 3.86 (s, 3H), 3.85 (s, 3H), 2.72 (t,  $J = 7.5$  Hz, 2H), 2.58 (t,  $J = 7.4$  Hz, 2H), 2.15 (p,  $J = 7.5$  Hz, 2H);  $^{13}\text{C}$  NMR (100 MHz,  $\text{CDCl}_3$ )  $\delta$  171.5, 148.9, 148.1, 147.3, 138.3, 136.3, 134.5, 134.1, 127.9, 127.4, 121.6, 121.4, 120.4, 116.4, 111.9, 111.3, 55.9, 55.8, 37.2, 34.8, 27.2; HRMS  $m/z$   $[\text{M}+\text{H}]^+$  calculated for  $\text{C}_{21}\text{H}_{23}\text{N}_2\text{O}_3^+$ : 351.1709, found: 351.1708.

#### 4-(3,5-dimethylphenyl)-*N*-(quinolin-8-yl)butanamide (**3al**)<sup>4a</sup>

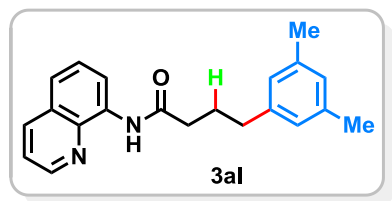

Following the general procedure, the desired product **3al** was isolated by preparative TLC on silica gel (eluent: DCM/EtOAc = 100/1) as a pale yellow oil (40.7 mg, 64% yield).  $^1\text{H}$  NMR (400 MHz,  $\text{CDCl}_3$ )  $\delta$  9.78 (s, 1H), 8.82-8.76 (m, 2H), 8.14 (dd,  $J = 8.3, 1.6$  Hz, 1H), 7.56-7.46 (m, 2H), 7.43 (dd,  $J = 8.3, 4.2$  Hz, 1H), 6.88-6.82 (m, 3H), 2.69 (t,  $J = 7.5$  Hz, 2H), 2.56 (t,  $J = 7.4$  Hz, 2H), 2.28 (s, 6H), 2.14 (p,  $J = 7.5$  Hz, 2H);  $^{13}\text{C}$  NMR (100 MHz,  $\text{CDCl}_3$ )  $\delta$  171.5, 148.0, 141.4, 138.3, 137.8, 136.3, 134.5, 127.9, 127.6, 127.4, 126.4, 121.5, 121.3, 116.4, 37.3, 35.0, 27.0, 21.2.

#### 4-(3-fluoro-5-methoxyphenyl)-*N*-(quinolin-8-yl)butanamide (**3am**)

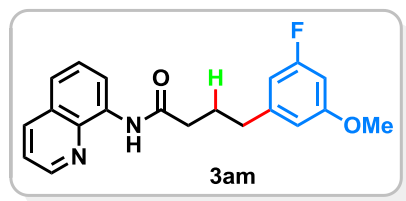

Following the general procedure, the desired product **3am** was isolated by preparative TLC on silica gel (eluent: PE/EtOAc = 9/1) as a pale yellow oil (47.0 mg, 69% yield).  $^1\text{H}$  NMR (400 MHz,  $\text{CDCl}_3$ )  $\delta$  9.79 (s, 1H), 8.82-8.73 (m, 2H), 8.15 (dd,  $J = 8.3, 1.6$  Hz, 1H), 7.56-7.47 (m, 2H), 7.44 (dd,  $J = 8.3, 4.2$  Hz, 1H), 6.60-6.54 (m, 2H), 6.46 (dt,  $J = 10.7, 2.3$  Hz, 1H), 3.76 (s, 3H), 2.72 (t,  $J = 7.5$  Hz, 2H), 2.57 (t,  $J = 7.4$  Hz, 2H), 2.14 (p,  $J = 7.5$  Hz, 2H);  $^{13}\text{C}$  NMR (100 MHz,  $\text{CDCl}_3$ )  $\delta$  171.1, 163.6 (d,  $J = 243.0$  Hz), 160.9 (d,  $J = 11.4$  Hz), 148.1, 144.6 (d,  $J = 9.2$  Hz), 138.3, 136.3, 134.5, 127.9, 127.4, 121.6, 121.4, 116.4, 111.0 (d,  $J = 2.5$  Hz), 107.7 (d,  $J = 21.2$  Hz), 99.2

(d,  $J = 24.9$  Hz), 55.4, 37.1, 35.1 (d,  $J = 2.0$  Hz), 26.6;  **$^{19}\text{F}$  NMR (376 MHz,  $\text{CDCl}_3$ )**  $\delta$  -112.36; **HRMS  $m/z$   $[\text{M}+\text{H}]^+$**  calculated for  $\text{C}_{20}\text{H}_{20}\text{FN}_2\text{O}_2^+$ : 339.1509, found: 339.1505.

***N*-(quinolin-8-yl)-4-(2,4,5-trimethylphenyl)butanamide (3an)**

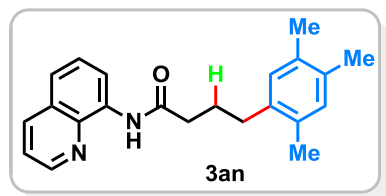

Following the general procedure, the desired product **3an** was isolated by preparative TLC on silica gel (eluent: DCM/EtOAc = 50/1) as a pale yellow oil (36.3 mg, 55% yield).  **$^1\text{H}$  NMR (400 MHz,  $\text{CDCl}_3$ )**  $\delta$  9.80 (s, 1H), 8.82-8.76 (m, 2H), 8.14 (dd,  $J = 8.3, 1.6$  Hz, 1H), 7.57-7.47 (m, 2H), 7.43 (dd,  $J = 8.3, 4.2$  Hz, 1H), 6.96 (s, 1H), 6.91 (s, 3H), 2.73-2.66 (m, 2H), 2.61 (t,  $J = 7.4$  Hz, 2H), 2.27 (s, 3H), 2.19 (s, 3H), 2.19 (s, 3H), 2.14-2.04 (m, 2H);  **$^{13}\text{C}$  NMR (100 MHz,  $\text{CDCl}_3$ )**  $\delta$  171.5, 148.1, 138.3, 136.9, 136.3, 134.5, 134.0, 133.8, 133.1, 131.6, 130.5, 127.9, 127.4, 121.5, 121.3, 116.4, 37.6, 32.2, 26.0, 19.12, 19.06, 18.6; **HRMS  $m/z$   $[\text{M}+\text{H}]^+$**  calculated for  $\text{C}_{22}\text{H}_{25}\text{N}_2\text{O}^+$ : 333.1967, found: 333.1965.

**4-(4-methoxy-3,5-dimethylphenyl)-*N*-(quinolin-8-yl)butanamide (3ao)<sup>4d</sup>**

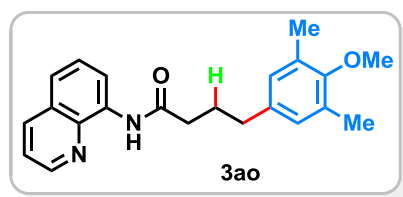

Following the general procedure, the desired product **3ao** was isolated by preparative TLC on silica gel (eluent: PE/EtOAc = 9/1) as a pale yellow oil (59.2 mg, 56% yield).  **$^1\text{H}$  NMR (400 MHz,  $\text{CDCl}_3$ )**  $\delta$  9.78 (s, 1H), 8.82-8.76 (m, 2H), 8.15 (dd,  $J = 8.3, 1.6$  Hz, 1H), 7.56-7.47 (m, 2H), 7.44 (dd,  $J = 8.3, 4.2$  Hz, 1H), 6.87 (s, 2H), 3.69 (s, 3H), 2.65 (t,  $J = 7.5$  Hz, 2H), 2.56 (t,  $J = 7.4$  Hz, 2H), 2.25 (s, 6H), 2.12 (p,  $J = 7.5$  Hz, 2H);  **$^{13}\text{C}$  NMR (100 MHz,  $\text{CDCl}_3$ )**  $\delta$  171.5, 155.2, 148.1, 138.3, 136.7, 136.3, 134.5, 130.5, 128.9, 127.9, 127.4, 121.5, 121.3, 116.4, 59.6, 37.3, 34.5, 27.1, 16.0.

**4-mesityl-*N*-(quinolin-8-yl)butanamide (3ap)**

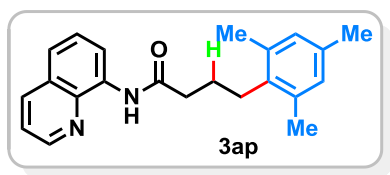

Following the general procedure with **2ap** (3.0 equiv), the desired product **3ap** was isolated by preparative TLC on silica gel (eluent: DCM/EtOAc = 100/1) as a pale yellow oil (12.1 mg, 18% yield). **<sup>1</sup>H NMR (400 MHz, CDCl<sub>3</sub>)** δ 9.82 (s, 1H), 8.83-8.76 (m, 2H), 8.15 (dd, *J* = 8.3, 1.6 Hz, 1H), 7.57-7.47 (m, 2H), 7.45 (dd, *J* = 8.3, 4.2 Hz, 1H), 6.83 (s, 2H), 2.77-2.70 (m, 2H), 2.68 (t, *J* = 7.2 Hz, 2H), 2.32 (s, 6H), 2.24 (s, 3H), 2.02-1.94 (m, 2H); **<sup>13</sup>C NMR (100 MHz, CDCl<sub>3</sub>)** δ 171.3, 148.1, 138.4, 136.3, 136.1, 135.4, 135.1, 134.5, 128.9, 128.0, 127.4, 121.5, 121.3, 116.5, 38.2, 28.9, 24.9, 20.8, 19.7; **HRMS *m/z* [M+H]<sup>+</sup>** calculated for C<sub>22</sub>H<sub>25</sub>N<sub>2</sub>O<sup>+</sup>: 333.1967, found: 333.1968.

***N*-(quinolin-8-yl)-4-(thiophen-2-yl)butanamide (**3aq**)<sup>4a</sup>**

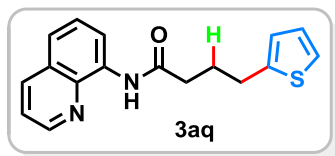

Following the general procedure with **2ar** (3.0 equiv), the desired product **3aq** was isolated by preparative TLC on silica gel (eluent: DCM/EtOAc = 100/1) as a pale yellow oil (29.1 mg, 49% yield). **<sup>1</sup>H NMR (400 MHz, CDCl<sub>3</sub>)** δ 9.79 (s, 1H), 8.81-8.76 (m, 2H), 8.15 (dd, *J* = 8.3, 1.6 Hz, 1H), 7.57-7.47 (m, 2H), 7.44 (dd, *J* = 8.3, 4.2 Hz, 1H), 7.14 (dd, *J* = 5.1, 1.1 Hz, 1H), 6.95-6.92 (m, 1H), 6.88-6.83 (m, 1H), 3.00 (t, *J* = 7.4 Hz, 2H), 2.62 (t, *J* = 7.4 Hz, 2H), 2.21 (p, *J* = 7.5 Hz, 2H); **<sup>13</sup>C NMR (100 MHz, CDCl<sub>3</sub>)** δ 171.1, 148.1, 144.2, 138.3, 136.3, 134.5, 127.9, 127.4, 126.8, 124.6, 123.2, 121.6, 121.4, 116.5, 37.0, 29.2, 27.3.

**4-(5-methylthiophen-2-yl)-*N*-(quinolin-8-yl)butanamide (**3ar**)**

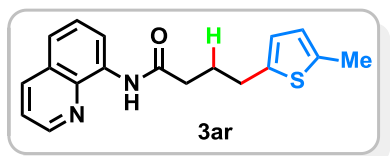

Following the general procedure with **2ar** (3.0 equiv), the desired product **3ar** was

isolated by preparative TLC on silica gel (eluent: DCM/EtOAc = 100/1) as a pale yellow oil (32.9 mg, 53% yield). **<sup>1</sup>H NMR (400 MHz, CDCl<sub>3</sub>)** δ 9.81 (s, 1H), 8.85-8.78 (m, 2H), 8.18 (dd, *J* = 8.3, 1.6 Hz, 1H), 7.59-7.50 (m, 2H), 7.47 (dd, *J* = 8.3, 4.2 Hz, 1H), 6.65 (d, *J* = 3.3 Hz, 1H), 6.60-6.57 (m, 1H), 2.93 (t, *J* = 7.3 Hz, 2H), 2.64 (t, *J* = 7.4 Hz, 2H), 2.46 (s, 3H), 2.19 (p, *J* = 7.4 Hz, 2H); **<sup>13</sup>C NMR (100 MHz, CDCl<sub>3</sub>)** δ 171.2, 148.1, 142.0, 138.3, 137.6, 136.3, 134.5, 127.9, 127.4, 124.7, 124.4, 121.6, 121.4, 116.4, 37.0, 29.4, 27.3, 15.3; **HRMS *m/z* [M+H]<sup>+</sup>** calculated for C<sub>18</sub>H<sub>19</sub>N<sub>2</sub>OS<sup>+</sup>: 311.1218, found: 311.1222.

#### 4-(3-methylthiophen-2-yl)-*N*-(quinolin-8-yl)butanamide (**3as**)

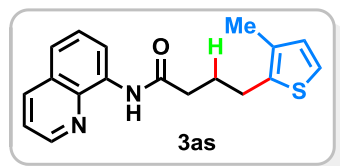

Following the general procedure with **2as** (3.0 equiv), the desired product **3as** was isolated by preparative TLC on silica gel (eluent: DCM/EtOAc = 100/1) as a pale yellow oil (32.4 mg, 52% yield). **<sup>1</sup>H NMR (400 MHz, CDCl<sub>3</sub>)** δ 9.79 (s, 1H), 8.83-8.74 (m, 2H), 8.15 (dd, *J* = 8.3, 1.7 Hz, 1H), 7.56-7.47 (m, 2H), 7.44 (dd, *J* = 8.3, 4.2 Hz, 1H), 7.04 (d, *J* = 5.1 Hz, 1H), 6.79 (d, *J* = 5.1 Hz, 1H), 2.89 (t, *J* = 7.5 Hz, 2H), 2.62 (t, *J* = 7.4 Hz, 2H), 2.21-2.11 (m, 2H), 2.17 (s, 3H); **<sup>13</sup>C NMR (100 MHz, CDCl<sub>3</sub>)** δ 171.1, 148.1, 138.3, 137.3, 136.3, 134.5, 133.1, 130.0, 127.9, 127.4, 121.6, 121.4, 121.2, 116.5, 37.0, 27.2, 27.0, 13.6; **HRMS *m/z* [M+H]<sup>+</sup>** calculated for C<sub>18</sub>H<sub>19</sub>N<sub>2</sub>OS<sup>+</sup>: 311.1218, found: 311.1218.

#### *N*-(quinolin-8-yl)-4-(thiophen-3-yl)butanamide (**3at**)<sup>4a</sup>

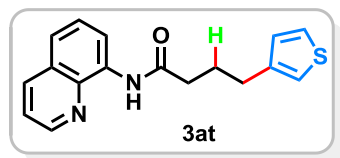

Following the general procedure, the desired product **3at** was isolated by preparative TLC on silica gel (eluent: DCM/EtOAc = 100/1) as a pale yellow oil (44.3 mg, 75% yield). **<sup>1</sup>H NMR (400 MHz, CDCl<sub>3</sub>)** δ 9.79 (s, 1H), 8.80-8.77 (m, 2H), 8.14 (dd, *J* = 8.3, 1.6 Hz, 1H), 7.55-7.47 (m, 2H), 7.44 (dd, *J* = 8.3, 4.2 Hz, 1H), 7.27-7.24 (m, 1H),

7.02-6.98 (m, 2H), 2.79 (t,  $J = 7.5$  Hz, 2H), 2.58 (t,  $J = 7.4$  Hz, 2H), 2.16 (p,  $J = 7.5$  Hz, 2H);  $^{13}\text{C}$  NMR (100 MHz,  $\text{CDCl}_3$ )  $\delta$  171.3, 148.1, 141.8, 138.3, 136.3, 134.5, 128.1, 127.9, 127.4, 125.4, 121.5, 121.3, 120.5, 116.4, 37.3, 29.5, 26.2.

**4-(benzofuran-5-yl)-*N*-(quinolin-8-yl)butanamide (3au)<sup>4d</sup>**

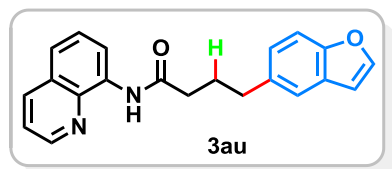

Following the general procedure, the desired product **3au** was isolated by preparative TLC on silica gel (eluent: PE/EtOAc = 9/1) as a pale yellow oil (36.4 mg, 55% yield).  $^1\text{H}$  NMR (400 MHz,  $\text{CDCl}_3$ )  $\delta$  9.78 (s, 1H), 8.82-8.75 (m, 2H), 8.16 (dd,  $J = 8.3, 1.5$  Hz, 1H), 7.59 (d,  $J = 2.2$  Hz, 1H), 7.57-7.48 (m, 2H), 7.47-7.40 (m, 3H), 7.17 (dd,  $J = 8.4, 1.5$  Hz, 1H), 6.70 (dd,  $J = 2.1, 0.8$  Hz, 1H), 2.86 (t,  $J = 7.5$  Hz, 2H), 2.58 (t,  $J = 7.4$  Hz, 2H), 2.20 (p,  $J = 7.5$  Hz, 2H);  $^{13}\text{C}$  NMR (100 MHz,  $\text{CDCl}_3$ )  $\delta$  171.5, 153.7, 148.1, 145.1, 138.4, 136.4, 135.9, 134.5, 128.0, 127.6, 127.4, 125.0, 121.6, 121.4, 120.7, 116.5, 111.1, 106.4, 37.2, 35.1, 27.6.

**4-(benzo[*b*]thiophen-5-yl)-*N*-(quinolin-8-yl)butanamide (3av)**

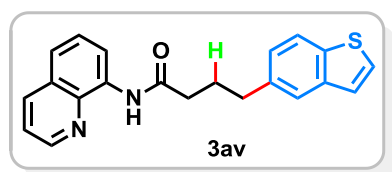

Following the general procedure, the desired product **3av** was isolated by preparative TLC on silica gel (eluent: PE/EtOAc = 9/1) as a pale yellow oil (43.2 mg, 62% yield).  $^1\text{H}$  NMR (400 MHz,  $\text{CDCl}_3$ )  $\delta$  9.78 (s, 1H), 8.82-8.75 (m, 2H), 8.15 (dd,  $J = 8.3, 1.5$  Hz, 1H), 7.80 (d,  $J = 8.3$  Hz, 1H), 7.69 (s, 1H), 7.57-7.47 (m, 2H), 7.44 (dd,  $J = 8.3, 4.2$  Hz, 1H), 7.41 (d,  $J = 5.4$  Hz, 1H), 7.28-7.22 (m, 2H), 2.89 (t,  $J = 7.5$  Hz, 2H), 2.59 (t,  $J = 7.4$  Hz, 2H), 2.22 (p,  $J = 7.5$  Hz, 2H);  $^{13}\text{C}$  NMR (100 MHz,  $\text{CDCl}_3$ )  $\delta$  171.4, 148.1, 140.0, 138.4, 137.6, 137.5, 136.3, 134.5, 128.0, 127.4, 126.5, 125.4, 123.6, 123.2, 122.4, 121.6, 121.4, 116.5, 37.2, 35.1, 27.3; HRMS  $m/z$   $[\text{M}+\text{H}]^+$  calculated for  $\text{C}_{21}\text{H}_{19}\text{N}_2\text{OS}^+$ : 347.1218, found: 347.1215.

### 2-methyl-4-phenyl-*N*-(quinolin-8-yl)butanamide (**4b**)<sup>4b</sup>

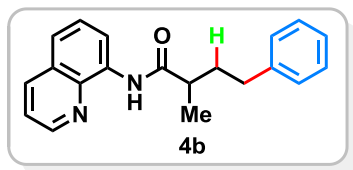

Following the general procedure, the desired product **4b** was isolated by preparative TLC on silica gel (eluent: DCM/EtOAc = 100/1) as an off-white solid (45.6 mg, 75% yield). **<sup>1</sup>H NMR (400 MHz, CDCl<sub>3</sub>)**  $\delta$  9.87 (s, 1H), 8.86-8.78 (m, 2H), 8.16 (dd,  $J$  = 8.3, 1.6 Hz, 1H), 7.57-7.48 (m, 2H), 7.45 (dd,  $J$  = 8.3, 4.2 Hz, 1H), 7.30-7.16 (m, 5H), 2.82-2.67 (m, 2H), 2.67-2.58 (m, 1H), 2.27-2.16 (m, 1H), 1.91-1.81 (m, 1H), 1.36 (d,  $J$  = 6.9 Hz, 3H); **<sup>13</sup>C NMR (100 MHz, CDCl<sub>3</sub>)**  $\delta$  175.0, 148.1, 141.7, 138.5, 136.3, 134.5, 128.5, 128.4, 127.9, 127.4, 125.9, 121.6, 121.4, 116.5, 42.3, 36.0, 33.6, 18.2.

### 2-phenethyl-4-phenyl-*N*-(quinolin-8-yl)butanamide (**4c**)

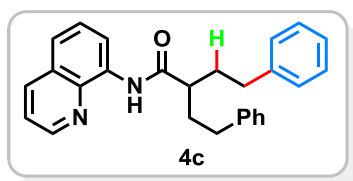

Following the general procedure, the desired product **4c** was isolated by preparative TLC on silica gel (eluent: DCM/EtOAc = 50/1) as a pale yellow solid (57.5 mg, 73% yield). **<sup>1</sup>H NMR (400 MHz, CDCl<sub>3</sub>)**  $\delta$  9.88 (s, 1H), 8.87 (dd,  $J$  = 7.3, 1.4 Hz, 1H), 8.82 (dd,  $J$  = 4.2, 1.6 Hz, 1H), 8.17 (dd,  $J$  = 8.3, 1.6 Hz, 1H), 7.59-7.50 (m, 2H), 7.46 (dd,  $J$  = 8.3, 4.2 Hz, 1H), 7.28-7.22 (m, 4H), 7.21-7.14 (m, 6H), 2.80-2.70 (m, 2H), 2.70-2.60 (m, 2H), 2.57-2.48 (m, 1H), 2.26-2.14 (m, 2H), 1.96-1.84 (m, 2H); **<sup>13</sup>C NMR (100 MHz, CDCl<sub>3</sub>)**  $\delta$  174.0, 148.2, 141.7, 138.5, 136.3, 134.4, 128.5, 128.4, 128.0, 127.4, 125.9, 121.6, 121.5, 116.6, 47.9, 34.9, 33.7; **HRMS  $m/z$  [M+H]<sup>+</sup>** calculated for C<sub>27</sub>H<sub>27</sub>N<sub>2</sub>O<sup>+</sup>: 395.2123, found: 395.2122.

### 5-methoxy-2-phenethyl-*N*-(quinolin-8-yl)pentanamide (**4d**)

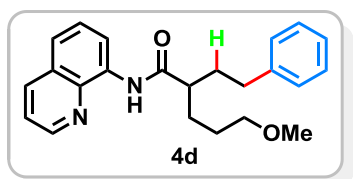

Following the general procedure, the desired product **4d** was isolated by preparative TLC on silica gel (eluent: PE/EtOAc = 9/1) as an off-white solid (55.7 mg, 77% yield). **<sup>1</sup>H NMR (400 MHz, CDCl<sub>3</sub>)** δ 9.91 (s, 1H), 8.85 (dd, *J* = 7.3, 1.6 Hz, 1H), 8.82 (dd, *J* = 4.2, 1.6 Hz, 1H), 8.16 (dd, *J* = 8.3, 1.6 Hz, 1H), 7.58-7.49 (m, 2H), 7.46 (dd, *J* = 8.3, 4.2 Hz, 1H), 7.30-7.15 (m, 5H), 3.45-3.33 (m, 2H), 3.30 (s, 3H), 2.82-2.72 (m, 1H), 2.71-2.61 (m, 1H), 2.58-2.48 (m, 1H), 2.24-2.13 (m, 1H), 1.94-1.83 (m, 2H), 1.73-1.64 (m, 3H); **<sup>13</sup>C NMR (100 MHz, CDCl<sub>3</sub>)** δ 174.3, 148.1, 141.7, 138.5, 136.3, 134.5, 128.5, 128.4, 128.0, 127.4, 125.8, 121.6, 121.4, 116.6, 72.6, 58.5, 48.2, 34.8, 33.7, 30.1, 27.5; **HRMS *m/z* [M+H]<sup>+</sup>** calculated for C<sub>23</sub>H<sub>27</sub>N<sub>2</sub>O<sub>2</sub><sup>+</sup>: 363.2073, found: 363.2070.

### 3-methyl-4-phenyl-*N*-(quinolin-8-yl)butanamide (**4e**)<sup>4b</sup>

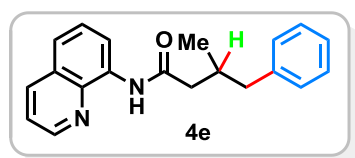

Following the general procedure, the desired product **4e** was isolated by preparative TLC on silica gel (eluent: DCM/EtOAc = 100/1) as an off-white solid (23.2 mg, 38% yield). **<sup>1</sup>H NMR (400 MHz, CDCl<sub>3</sub>)** δ 9.78 (s, 1H), 8.82-8.76 (m, 2H), 8.14 (dd, *J* = 8.3, 1.6 Hz, 1H), 7.55-7.46 (m, 2H), 7.44 (dd, *J* = 8.3, 4.2 Hz, 1H), 7.31-7.26 (m, 2H), 7.26-7.17 (m, 3H), 2.78 (dd, *J* = 13.1, 6.1 Hz, 1H), 2.62-2.55 (m, 2H), 2.56-2.46 (m, 1H), 2.37 (dd, *J* = 13.9, 7.6 Hz, 1H), 1.05 (d, *J* = 6.4 Hz, 3H); **<sup>13</sup>C NMR (100 MHz, CDCl<sub>3</sub>)** δ 171.0, 148.1, 140.3, 138.3, 136.3, 134.5, 129.3, 128.2, 127.9, 127.4, 126.0, 121.5, 121.3, 116.4, 45.0, 43.0, 32.7, 19.6.

### 4-phenyl-*N*-(quinolin-8-yl)pentanamide (**4f**)<sup>4b</sup>

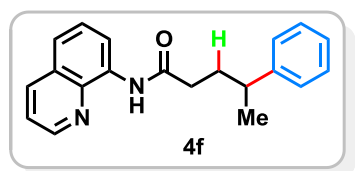

Following the general procedure, the desired product **4f** was isolated by preparative TLC on silica gel (eluent: DCM/EtOAc = 100/1) as a pale yellow oil (43.5 mg, 72% yield). **<sup>1</sup>H NMR (400 MHz, CDCl<sub>3</sub>)** δ 9.69 (s, 1H), 8.80-8.73 (m, 2H), 8.14 (dd, *J* =

8.3, 1.7 Hz, 1H), 7.55-7.46 (m, 2H), 7.43 (dd,  $J = 8.3, 4.2$  Hz, 1H), 7.34-7.29 (m, 2H), 7.27-7.18 (m, 3H), 2.88-2.88 (m, 1H), 2.43 (t,  $J = 7.7$  Hz, 2H), 2.22-2.12 (m, 1H), 2.12-2.01 (m, 1H), 1.33 (d,  $J = 6.9$  Hz, 3H);  $^{13}\text{C}$  NMR (100 MHz,  $\text{CDCl}_3$ )  $\delta$  171.6, 148.0, 146.4, 138.3, 136.3, 134.5, 128.5, 127.9, 127.4, 127.1, 126.2, 121.5, 121.3, 116.4, 39.5, 36.2, 33.7, 22.5.

#### 4-phenyl-*N*-(quinolin-8-yl)hexanamide (**4g**)<sup>4b</sup>

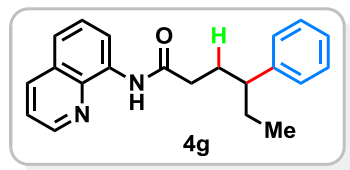

Following the general procedure, the desired product **4g** was isolated by preparative TLC on silica gel (eluent: DCM/EtOAc = 100/1) as a pale yellow oil (from *cis*: 44.9 mg, 71% yield; from *trans*: 46.4 mg, 73% yield).  $^1\text{H}$  NMR (400 MHz,  $\text{CDCl}_3$ )  $\delta$  9.68 (s, 1H), 8.83-8.76 (m, 2H), 8.16 (dd,  $J = 8.3, 1.6$  Hz, 1H), 7.58-7.48 (m, 2H), 7.45 (dd,  $J = 8.3, 4.2$  Hz, 1H), 7.37-7.31 (m, 2H), 7.27-7.21 (m, 3H), 2.62-2.53 (m, 1H), 2.47-2.36 (m, 2H), 2.35-2.26 (m, 1H), 2.09-1.98 (m, 1H), 1.83-1.74 (m, 1H), 1.74-1.61 (m, 1H), 0.83 (t,  $J = 7.4$  Hz, 3H);  $^{13}\text{C}$  NMR (100 MHz,  $\text{CDCl}_3$ )  $\delta$  171.7, 148.0, 144.6, 138.3, 136.3, 134.5, 128.4, 127.9, 127.8, 127.4, 126.2, 121.5, 121.3, 116.4, 47.3, 36.1, 31.9, 29.9, 12.1.

#### 4-phenyl-*N*-(quinolin-8-yl)heptanamide (**4h**)

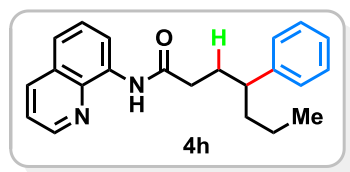

Following the general procedure, the desired product **4h** was isolated by preparative TLC on silica gel (eluent: DCM/EtOAc = 100/1) as a pale yellow oil (51.5 mg, 78% yield).  $^1\text{H}$  NMR (400 MHz,  $\text{CDCl}_3$ )  $\delta$  9.65 (s, 1H), 8.76 (dd,  $J = 4.3, 1.6$  Hz, 2H), 8.13 (dd,  $J = 8.3, 1.7$  Hz, 1H), 7.55-7.45 (m, 2H), 7.42 (dd,  $J = 8.3, 4.2$  Hz, 1H), 7.33-7.28 (m, 2H), 7.23-7.18 (m, 3H), 2.69-2.59 (m, 1H), 2.40-2.33 (m, 2H), 2.30-2.19 (m, 1H), 2.05-1.94 (m, 1H), 1.72-1.59 (m, 2H), 1.27-1.12 (m, 2H), 0.84 (t,  $J$



= 7.3 Hz, 3H);  $^{13}\text{C}$  NMR (100 MHz,  $\text{CDCl}_3$ )  $\delta$  171.7, 148.0, 144.9, 138.3, 136.3, 134.5, 128.4, 127.9, 127.8, 127.4, 126.2, 121.5, 121.3, 116.4, 45.3, 39.3, 36.1, 32.2, 20.6, 14.1; HRMS  $m/z$   $[\text{M}+\text{H}]^+$  calculated for  $\text{C}_{22}\text{H}_{25}\text{N}_2\text{O}^+$ : 333.1967, found: 333.1963.

**5,5-dimethyl-4-phenyl-*N*-(quinolin-8-yl)hexanamide (4i)**<sup>4d</sup>

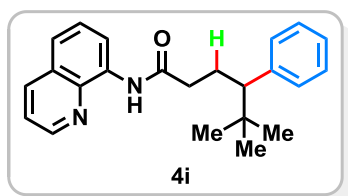

Following the general procedure with 3.0 equiv of trimethoxyphenylsilane **2a**, the desired product **4i** was isolated by preparative TLC on silica gel (eluent: DCM/EtOAc = 100/1) as a pale yellow oil (42.5 mg, 61% yield).  $^1\text{H}$  NMR (400 MHz,  $\text{CDCl}_3$ )  $\delta$  9.58 (s, 1H), 8.79-8.72 (m, 2H), 8.13 (dd,  $J$  = 8.3, 1.6 Hz, 1H), 7.54-7.45 (m, 2H), 7.42 (dd,  $J$  = 8.3, 4.2 Hz, 1H), 7.33-7.26 (m, 2H), 7.25-7.18 (m, 3H), 2.48-2.10 (m, 5H), 0.92 (s, 9H);  $^{13}\text{C}$  NMR (100 MHz,  $\text{CDCl}_3$ )  $\delta$  171.9, 148.0, 142.1, 138.3, 136.3, 134.6, 127.9, 127.8, 127.4, 126.2, 121.5, 121.2, 116.3, 56.2, 36.9, 34.0, 28.2, 25.2.

**4-phenyl-*N*-(quinolin-8-yl)octanamide (4j)**<sup>4c</sup>

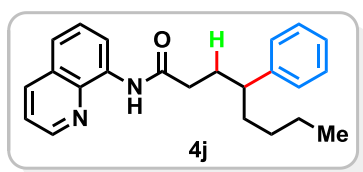

Following the general procedure, the desired product **4j** was isolated by preparative TLC on silica gel (eluent: DCM/EtOAc = 100/1) as a pale yellow oil (47.9 mg, 69% yield).  $^1\text{H}$  NMR (400 MHz,  $\text{CDCl}_3$ )  $\delta$  9.68 (s, 1H), 8.83-8.77 (m, 2H), 8.17 (dd,  $J$  = 8.3, 1.7 Hz, 1H), 7.58-7.49 (m, 2H), 7.46 (dd,  $J$  = 8.3, 4.2 Hz, 1H), 7.36-7.31 (m, 2H), 7.27-7.20 (m, 3H), 2.70-2.60 (m, 1H), 2.46-2.33 (m, 2H), 2.33-2.23 (m, 1H), 2.08-1.97 (m, 1H), 1.78-1.61 (m, 2H), 1.36-1.19 (m, 3H), 1.19-1.09 (m, 1H), 0.85 (t,  $J$  = 7.1 Hz, 3H);  $^{13}\text{C}$  NMR (100 MHz,  $\text{CDCl}_3$ )  $\delta$  171.7, 148.0, 145.0, 138.3, 136.3, 134.5, 128.4, 127.9, 127.8, 127.4, 126.2, 121.5, 121.3, 116.4, 45.5, 36.8, 36.1, 32.3, 29.7, 22.7, 14.0.

#### 7-chloro-4-phenyl-*N*-(quinolin-8-yl)heptanamide (**4k**)

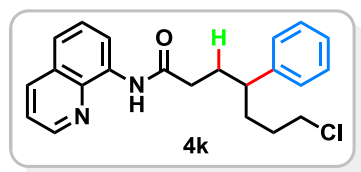

Following the general procedure, the desired product **4k** was isolated by preparative TLC on silica gel (eluent: DCM/EtOAc = 50/1) as a pale yellow oil (52.4 mg, 71% yield). **<sup>1</sup>H NMR (400 MHz, CDCl<sub>3</sub>)** δ 9.68 (s, 1H), 8.83-8.74 (m, 2H), 8.17 (dd, *J* = 8.3, 1.6 Hz, 1H), 7.58-7.49 (m, 2H), 7.46 (dd, *J* = 8.3, 4.2 Hz, 1H), 7.38-7.31 (m, 2H), 7.28-7.21 (m, 3H), 3.49 (t, *J* = 6.5 Hz, 2H), 2.74-2.64 (m, 1H), 2.47-2.36 (m, 2H), 2.35-2.23 (m, 1H), 2.11-2.00 (m, 1H), 1.97-1.85 (m, 1H), 1.84-1.58 (m, 3H); **<sup>13</sup>C NMR (100 MHz, CDCl<sub>3</sub>)** δ 171.4, 148.0, 143.9, 138.3, 136.3, 134.5, 128.7, 127.9, 127.7, 127.4, 126.5, 121.5, 121.3, 116.4, 45.0, 44.9, 35.9, 34.2, 32.2 30.6; **HRMS *m/z* [M+H]<sup>+</sup>** calculated for C<sub>22</sub>H<sub>24</sub>ClN<sub>2</sub>O<sup>+</sup>: 367.1577, found: 367.1576.

#### 4-phenyl-*N*-(quinolin-8-yl)non-8-enamide (**4l**)

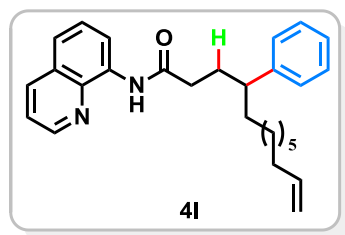

Following the general procedure, the desired product **4l** was isolated by preparative TLC on silica gel (eluent: DCM/EtOAc = 100/1) as a yellow oil (57.1 mg, 69% yield). **<sup>1</sup>H NMR (400 MHz, CDCl<sub>3</sub>)** δ 9.68 (s, 1H), 8.82-8.77 (m, 2H), 8.17 (dd, *J* = 8.3, 1.6 Hz, 1H), 7.58-7.49 (m, 2H), 7.46 (dd, *J* = 8.3, 4.2 Hz, 1H), 7.37-7.31 (m, 2H), 7.26-7.21 (m, 3H), 5.81 (ddt, *J* = 16.9, 10.2, 6.7 Hz, 1H), 5.05-4.90 (m, 2H), 2.69-2.59 (m, 1H), 2.44-2.36 (m, 2H), 2.33-2.24 (m, 1H), 2.09-1.97 (m, 3H), 1.76-1.60 (m, 3H), 1.38-1.16 (m, 10H); **<sup>13</sup>C NMR (100 MHz, CDCl<sub>3</sub>)** δ 171.7, 148.0, 144.9, 139.2, 138.3, 136.3, 134.5, 128.4, 127.9, 127.8, 127.4, 126.2, 121.5, 121.3, 116.4, 114.0, 45.5, 37.1, 36.1, 33.7, 32.3, 29.6, 29.3, 29.0, 28.9, 27.5; **HRMS *m/z* [M+H]<sup>+</sup>** calculated for C<sub>28</sub>H<sub>35</sub>N<sub>2</sub>O<sup>+</sup>: 415.2749, found: 415.2754.

#### 5,9-dimethyl-4-phenyl-*N*-(quinolin-8-yl)dec-8-enamide (**4m**)<sup>4d</sup>

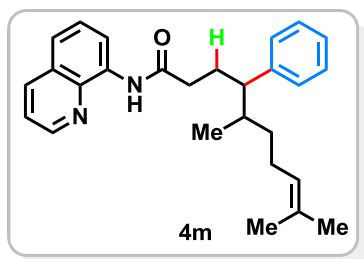

Following the general procedure with 3.0 equiv of trimethoxyphenylsilane **2a**, the desired product **4m** was isolated by preparative TLC on silica gel (eluent: DCM/EtOAc = 50/1) as a pale yellow oil (40.2 mg, 50% yield). **<sup>1</sup>H NMR (400 MHz, CDCl<sub>3</sub>)**  $\delta$  9.61 (s, 1H), 8.81-8.71 (m, 2H), 8.13 (dd,  $J$  = 8.3, 1.6 Hz, 1H), 7.54-7.46 (m, 2H), 7.42 (dd,  $J$  = 8.3, 4.2 Hz, 1H), 7.33-7.27 (m, 2H), 7.24-7.16 (m, 3H), 5.14-4.93 (m, 1H), 2.58-2.47 (m, 1H), 2.40-2.24 (m, 3H), 2.14-1.86 (m, 3H), 1.80-1.70 (m, 1H), 1.70-1.56 (m, 6H), 1.38-1.26 (m, 1H), 1.21-1.05 (m, 1H), 0.98 (d,  $J$  = 6.7 Hz, 2H), 0.76 (d,  $J$  = 6.8 Hz, 1H); **<sup>13</sup>C NMR (100 MHz, CDCl<sub>3</sub>)**  $\delta$  171.82, 171.78, 148.0, 143.7, 143.0, 138.3, 136.3, 134.6, 131.2, 131.1, 128.8, 128.6, 128.3, 128.2, 127.9, 127.4, 126.14, 126.10, 124.7, 121.5, 121.3, 116.4, 51.0, 50.7, 38.3, 38.1, 36.5, 36.4, 34.8, 34.4, 28.8, 27.7, 25.69, 25.65, 25.57, 25.55, 17.7, 17.6, 17.0, 16.8.

#### 4-phenyl-*N*-(quinolin-8-yl)nonanamide (**4n**)<sup>4d</sup>

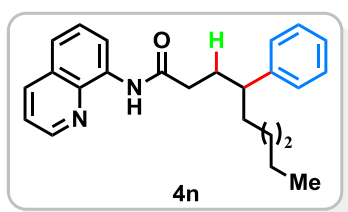

Following the general procedure, the desired product **4n** was isolated by preparative TLC on silica gel (eluent: DCM/EtOAc = 100/1) as a pale yellow oil (52.1 mg, 72% yield). **<sup>1</sup>H NMR (400 MHz, CDCl<sub>3</sub>)**  $\delta$  9.65 (s, 1H), 8.80-8.74 (m, 2H), 8.14 (dd,  $J$  = 8.2, 1.4 Hz, 1H), 7.55-7.46 (m, 2H), 7.43 (dd,  $J$  = 8.3, 4.2 Hz, 1H), 7.35-7.27 (m, 2H), 7.21 (t,  $J$  = 6.5 Hz, 3H), 2.62 (tt,  $J$  = 10.0, 5.1 Hz, 1H), 2.44-2.30 (m, 2H), 2.30-2.20 (m, 1H), 2.05-1.95 (m, 1H), 1.74-1.60 (m, 2H), 1.32-1.10 (m, 6H), 0.82 (t,  $J$  = 6.3 Hz, 3H); **<sup>13</sup>C NMR (100 MHz, CDCl<sub>3</sub>)**  $\delta$  171.7, 148.0, 144.9, 138.3, 136.3, 134.6, 128.5, 127.9, 127.8, 127.4, 126.2, 121.5, 121.3, 116.4, 45.6, 37.1, 36.1, 32.3, 31.9, 27.2, 22.5,

14.0.

#### 4-phenyl-*N*-(quinolin-8-yl)decanamide (**4o**)

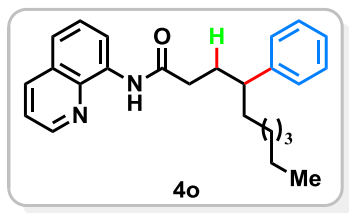

Following the general procedure, the desired product **4o** was isolated by preparative TLC on silica gel (eluent: DCM/EtOAc = 100/1) as a pale yellow oil (53.1 mg, 70% yield). **<sup>1</sup>H NMR (400 MHz, CDCl<sub>3</sub>)** δ 9.65 (s, 1H), 8.79-8.74 (m, 2H), 8.13 (dd, *J* = 8.3, 1.6 Hz, 1H), 7.54-7.45 (m, 2H), 7.42 (dd, *J* = 8.3, 4.2 Hz, 1H), 7.34-7.28 (m, 2H), 7.23-7.17 (m, 3H), 2.62 (tt, *J* = 10.1, 5.1 Hz, 1H), 2.41-2.32 (m, 2H), 2.31-2.20 (m, 1H), 2.05-1.94 (m, 1H), 1.74-1.57 (m, 2H), 1.30-1.09 (m, 8H), 0.83 (t, *J* = 6.9 Hz, 3H); **<sup>13</sup>C NMR (100 MHz, CDCl<sub>3</sub>)** δ 171.7, 148.0, 145.0, 138.3, 136.3, 134.5, 128.4, 127.9, 127.8, 127.4, 126.1, 121.5, 121.3, 116.4, 45.6, 37.1, 36.1, 32.3, 31.7, 29.3, 27.5, 22.6, 14.0; **HRMS *m/z* [M+H]<sup>+</sup>** calculated for C<sub>25</sub>H<sub>31</sub>N<sub>2</sub>O<sup>+</sup>: 375.2436, found: 375.2437.

#### 4-phenyl-*N*-(quinolin-8-yl)dodecanamide (**4p**)

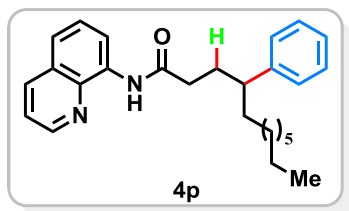

Following the general procedure, the desired product **4p** was isolated by preparative TLC on silica gel (eluent: DCM/EtOAc = 100/1) as a pale yellow oil (52.2 mg, 65% yield). **<sup>1</sup>H NMR (400 MHz, CDCl<sub>3</sub>)** δ 9.65 (s, 1H), 8.79-8.74 (m, 2H), 8.13 (dd, *J* = 8.3, 1.6 Hz, 1H), 7.54-7.46 (m, 2H), 7.43 (dd, *J* = 8.3, 4.2 Hz, 1H), 7.34-7.27 (m, 2H), 7.23-7.18 (m, 3H), 2.62 (tt, *J* = 10.0, 5.2 Hz, 1H), 2.42-2.31 (m, 2H), 2.30-2.20 (m, 1H), 2.05-1.94 (m, 1H), 1.74-1.58 (m, 2H), 1.30-1.13 (m, 12H), 0.85 (t, *J* = 6.9 Hz, 3H); **<sup>13</sup>C NMR (100 MHz, CDCl<sub>3</sub>)** δ 171.7, 148.0, 145.0, 138.3, 136.3, 134.5, 128.4, 127.9, 127.8, 127.4, 126.1, 121.5, 121.3, 116.4, 45.6, 37.1, 36.1, 32.3, 31.8, 29.7, 29.4,

29.2, 27.5, 22.6, 14.1; **HRMS**  $m/z$   $[M+H]^+$  calculated for  $C_{27}H_{35}N_2O^+$ : 403.2749, found: 403.2751.

**4-phenyl-*N*-(quinolin-8-yl)tetradecanamide (4q)**

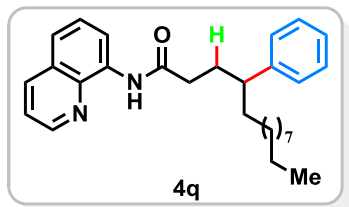

Following the general procedure, the desired product **4q** was isolated by preparative TLC on silica gel (eluent: DCM/EtOAc = 100/1) as a pale yellow oil (54.4 mg, 63% yield).  **$^1H$  NMR (400 MHz,  $CDCl_3$ )**  $\delta$  9.65 (s, 1H), 8.78-8.74 (m, 2H), 8.14 (dd,  $J$  = 8.2, 1.3 Hz, 1H), 7.55-7.46 (m, 2H), 7.43 (dd,  $J$  = 8.2, 4.2 Hz, 1H), 7.34-7.27 (m, 2H), 7.23-7.17 (m, 3H), 2.61 (dt,  $J$  = 14.6, 5.0 Hz, 1H), 2.42-2.32 (m, 2H), 2.30-2.19 (m, 1H), 2.05-1.94 (m, 1H), 1.74-1.59 (m, 2H), 1.32-1.13 (m, 16H), 0.87 (t,  $J$  = 6.9 Hz, 3H);  **$^{13}C$  NMR (100 MHz,  $CDCl_3$ )**  $\delta$  171.7, 148.0, 145.0, 138.3, 136.3, 134.6, 128.5, 127.9, 127.8, 127.4, 126.2, 121.5, 121.3, 116.4, 45.6, 37.1, 36.1, 32.3, 31.9, 29.7, 29.59, 29.56, 29.5, 29.3, 27.5, 22.7, 14.1; **HRMS**  $m/z$   $[M+H]^+$  calculated for  $C_{29}H_{29}N_2O^+$ : 431.3062, found: 431.3057.

**4,4-diphenyl-*N*-(quinolin-8-yl)butanamide (4r)<sup>4b</sup>**

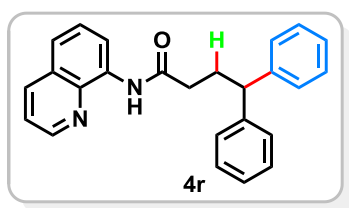

Following the general procedure, the desired product **4r** was isolated by preparative TLC on silica gel (eluent: PE/EtOAc = 9/1) as an off-white solid (54.7 mg, 75% yield).  **$^1H$  NMR (400 MHz,  $CDCl_3$ )**  $\delta$  9.69 (s, 1H), 8.81-8.72 (m, 2H), 8.13 (dd,  $J$  = 8.3, 1.6 Hz, 1H), 7.55-7.46 (m, 2H), 7.42 (dd,  $J$  = 8.3, 4.2 Hz, 1H), 7.33-7.25 (m, 8H), 7.22-7.16 (m, 2H), 4.05 (t,  $J$  = 7.6 Hz, 1H), 2.62-2.55 (m, 2H), 2.54-2.49 (m, 2H);  **$^{13}C$  NMR (100 MHz,  $CDCl_3$ )**  $\delta$  171.2, 148.0, 144.2, 138.3, 136.3, 134.5, 128.5, 127.9, 127.4, 126.3, 121.5, 121.4, 116.4, 50.5, 36.3, 30.0.

#### 4-(4-(*tert*-butyl)phenyl)-4-phenyl-*N*-(quinolin-8-yl)butanamide (**4s**)

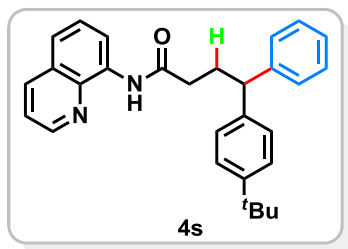

Following the general procedure, the desired product **4s** was isolated by preparative TLC on silica gel (eluent: PE/EtOAc = 9/1) as an off-white solid (59.0 mg, 70% yield). **<sup>1</sup>H NMR (400 MHz, CDCl<sub>3</sub>)** δ 9.68 (s, 1H), 8.79-8.73 (m, 2H), 8.13 (dd, *J* = 8.3, 1.6 Hz, 1H), 7.55-7.45 (m, 2H), 7.42 (dd, *J* = 8.3, 4.2 Hz, 1H), 7.33-7.26 (m, 6H), 7.24-7.15 (m, 3H), 4.01 (t, *J* = 7.6 Hz, 1H), 2.63-2.49 (m, 4H), 1.27 (s, 9H); **<sup>13</sup>C NMR (100 MHz, CDCl<sub>3</sub>)** δ 171.3, 149.0, 148.0, 144.5, 141.1, 138.3, 136.3, 134.5, 128.5, 127.93, 127.90, 127.5, 127.4, 126.2, 125.4, 121.5, 121.3, 116.4, 50.2, 36.4, 34.3, 31.3, 31.1; **HRMS *m/z* [M+H]<sup>+</sup>** calculated for C<sub>29</sub>H<sub>31</sub>N<sub>2</sub>O<sup>+</sup>: 423.2436, found: 423.2433.

#### 4-(naphthalen-2-yl)-4-phenyl-*N*-(quinolin-8-yl)butanamide (**4t**)

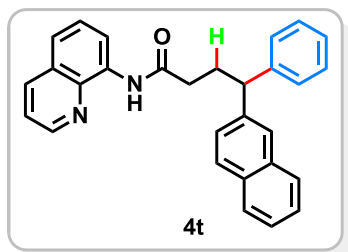

Following the general procedure, the desired product **4t** was isolated by preparative TLC on silica gel (eluent: PE/EtOAc = 9/1) as an off-white solid (55.1 mg, 66% yield). **<sup>1</sup>H NMR (400 MHz, CDCl<sub>3</sub>)** δ 9.69 (s, 1H), 8.78 (dd, *J* = 7.5, 1.3 Hz, 1H), 8.72 (dd, *J* = 4.2, 1.7 Hz, 1H), 8.12 (dd, *J* = 8.3, 1.6 Hz, 1H), 7.81-7.72 (m, 4H), 7.55-7.46 (m, 2H), 7.45-7.32 (m, 6H), 7.29 (dd, *J* = 10.3, 5.0 Hz, 2H), 7.21-7.16 (m, 1H), 4.21 (t, *J* = 7.8 Hz, 1H), 2.74-2.65 (m, 2H), 2.58-2.52 (m, 2H); **<sup>13</sup>C NMR (100 MHz, CDCl<sub>3</sub>)** δ 171.3, 148.0, 144.1, 141.6, 138.3, 136.3, 134.5, 133.5, 132.2, 128.6, 128.3, 128.0, 127.9, 127.8, 127.5, 127.4, 126.6, 126.4, 126.1, 126.0, 125.5, 121.5, 121.4, 116.4, 50.5, 36.3, 30.8; **HRMS *m/z* [M+H]<sup>+</sup>** calculated for C<sub>29</sub>H<sub>25</sub>N<sub>2</sub>O<sup>+</sup>: 417.1967, found:

417.1959.

**4-(*p*-tolyl)butanoic acid (**5a**) (CAS:4521-22-6)**

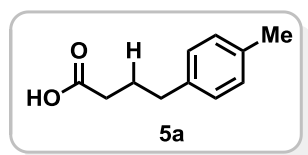

Following the general procedure, the desired product **5a** was isolated by preparative TLC on silica gel (eluent: PE/EtOAc = 9/1) as an off-white solid (33.4 mg, 94% yield).

**<sup>1</sup>H NMR (400 MHz, CDCl<sub>3</sub>)** δ 7.12-7.04 (m, 4H), 2.63 (t, *J* = 7.6 Hz, 2H), 2.36 (t, *J* = 7.5 Hz, 2H), 2.31 (s, 3H), 1.94 (p, *J* = 7.5 Hz, 2H); **<sup>13</sup>C NMR (100 MHz, CDCl<sub>3</sub>)** δ 179.9, 138.1, 135.5, 129.1, 128.3, 34.5, 33.3, 26.3, 21.0.

**ethyl 4-(naphthalen-2-yl)butanoate (**5b**)<sup>5a</sup>**

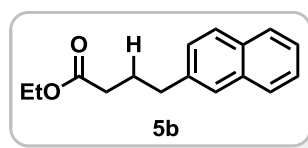

Following the general procedure, the desired product **5b** was isolated by preparative TLC on silica gel (eluent: PE/EtOAc = 95/5) as a pale yellow oil (42.2 mg, 87% yield).

**<sup>1</sup>H NMR (400 MHz, CDCl<sub>3</sub>)** δ 7.82-7.74 (m, 3H), 7.61 (s, 1H), 7.47-7.39 (m, 2H), 7.32 (dd, *J* = 8.4, 1.2 Hz, 1H), 4.12 (q, *J* = 7.1 Hz, 2H), 2.81 (t, *J* = 7.6 Hz, 2H), 2.35 (t, *J* = 7.5 Hz, 2H), 2.04 (p, *J* = 7.5 Hz, 2H), 1.24 (t, *J* = 7.1 Hz, 3H); **<sup>13</sup>C NMR (100 MHz, CDCl<sub>3</sub>)** δ 173.5, 138.9, 133.6, 132.1, 127.9, 127.6, 127.4, 127.2, 126.6, 125.9, 125.2, 60.2, 35.3, 33.6, 26.4, 14.2.

**methyl 4-(naphthalen-1-yl)butanoate (**5c**)<sup>5b</sup>**

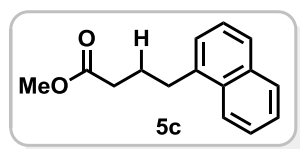

Following the general procedure, the desired product **5c** was isolated by preparative TLC on silica gel (eluent: PE/EtOAc = 95/5) as a pale yellow oil (54.1 mg, 82% yield).

**<sup>1</sup>H NMR (400 MHz, CDCl<sub>3</sub>)** δ 8.05 (d, *J* = 8.3 Hz, 1H), 7.86-7.82 (m, 1H), 7.71 (d, *J* = 8.2 Hz, 1H), 7.54-7.43 (m, 2H), 7.41-7.36 (m, 1H), 7.30 (d, *J* = 6.8 Hz, 1H), 3.67 (s,

3H), 3.15-3.07 (m, 2H), 2.41 (t,  $J = 7.3$  Hz, 2H), 2.14-2.04 (m, 2H);  $^{13}\text{C}$  NMR (100 MHz,  $\text{CDCl}_3$ )  $\delta$  173.9, 137.5, 133.9, 131.8, 128.7, 126.8, 126.1, 125.8, 125.5, 123.7, 51.5, 33.7, 32.3, 25.8.

## References

1. (a) Gurak, J. A.; Yang, K. S.; Liu, Z. and Engle, K. M. *J. Am. Chem. Soc.* **2016**, *138*, 5805–5808; (b) Yang, K. S.; Gurak, J. A.; Liu, Z. and Engle, K. M. *J. Am. Chem. Soc.* **2016**, *138*, 14705–14712; (c) Tang, C.; Zhang, R.; Zhu, B.; Fu, J.; Deng, Y.; Tian, L.; Guan, W. and Bi, X. *J. Am. Chem. Soc.* **2018**, *140*, 16929–16935.
2. Kawamata, Y.; Hashimoto, T. and Maruoka, K. *J. Am. Chem. Soc.* **2016**, *138*, 5206–5209.
3. (a) A. S. Manosa, C. Ahn, A. Soheili, C. J. Handy, R. Correia, W. M. Segamish and P. DeShong, *J. Org. Chem.* **2004**, *69*, 8305–8314; (b) J. Yu, J. Liu, G. Shi, C. Shao, Y. Zhang, *Angew. Chem., Int. Ed.* **2015**, *54*, 4079–4082. (c) Lu, M.-Z.; Ding, X.; Shao, C.; Hu, Z.; Luo, H.; Zhi, S.; Hu, H.; Kan, Y. and Loh, T.-P. *Org. Lett.* **2020**, *22*, 2663–2668.
4. (a) Lv, H.; Xiao, L.-J.; Zhao, D. and Zhou, Q.-L. *Chem. Sci.* **2018**, *9*, 6839–6843; (b) Matsuura, R.; Jenkins, T. C.; Hill, D. E.; Yang, K. S.; Gallego, G. M.; Yang, S.; He, M.; Wang, F.; Marsters, R. P.; McAlpine, I. and Engle, K. M. *Chem. Sci.* **2018**, *9*, 8363–8368; (c) Wang, C.; Xiao, G.; Guo, T.; Ding, Y.; Wu, X. and Loh, T.-P. *J. Am. Chem. Soc.* **2018**, *140*, 9332–9336; (d) Zheng, K.; Xiao, G.; Guo, T.; Ding, Y.; Wang, C.; Loh, T.-P. and Wu, X. *Org. Lett.* **2020**, *22*, 694–699.
5. (a) Wilhelm, T.; Lautens, M. *Org. Lett.* **2005**, *7*, 4053–4056. (b) Kerim, M. D.; Jia, S.; Theodorakidou, C.; Prévost, S.; Ka ĩn, L. E. *Chem. Commun.* **2018**, *54*, 10917–10920.



## 7. $^1\text{H}$ and $^{13}\text{C}$ NMR Spectra of Products

### 2-phenethyl-*N*-(quinolin-8-yl)but-3-enamide (1c)

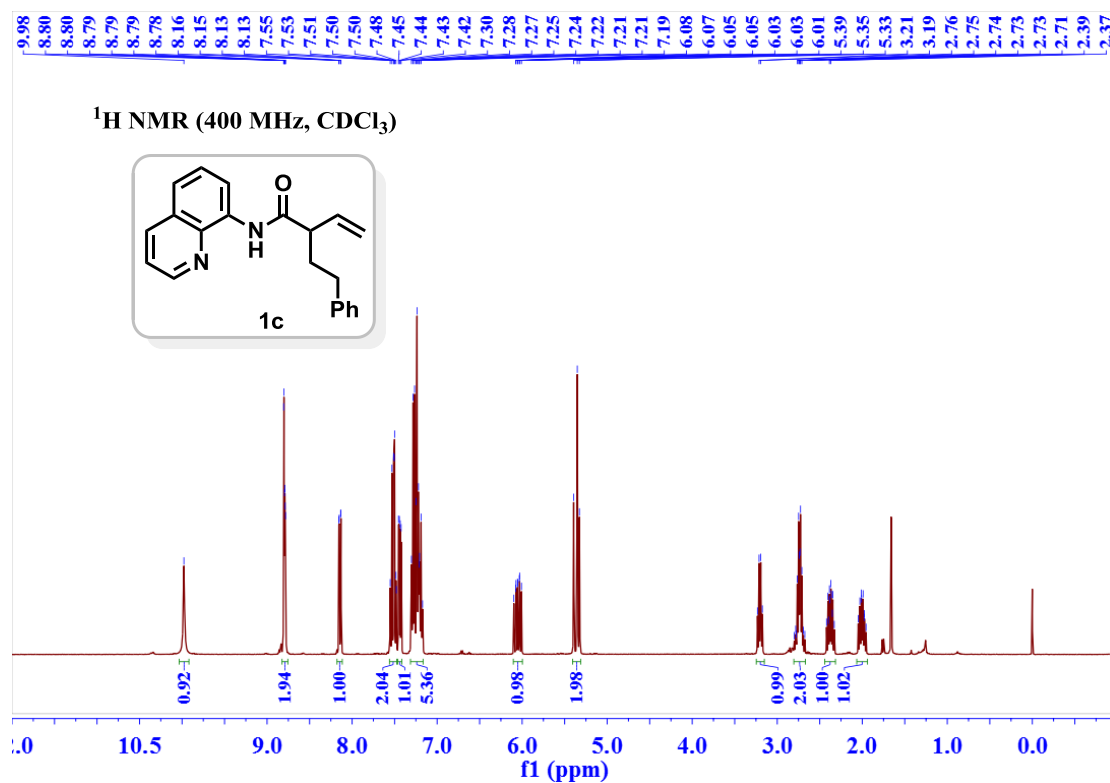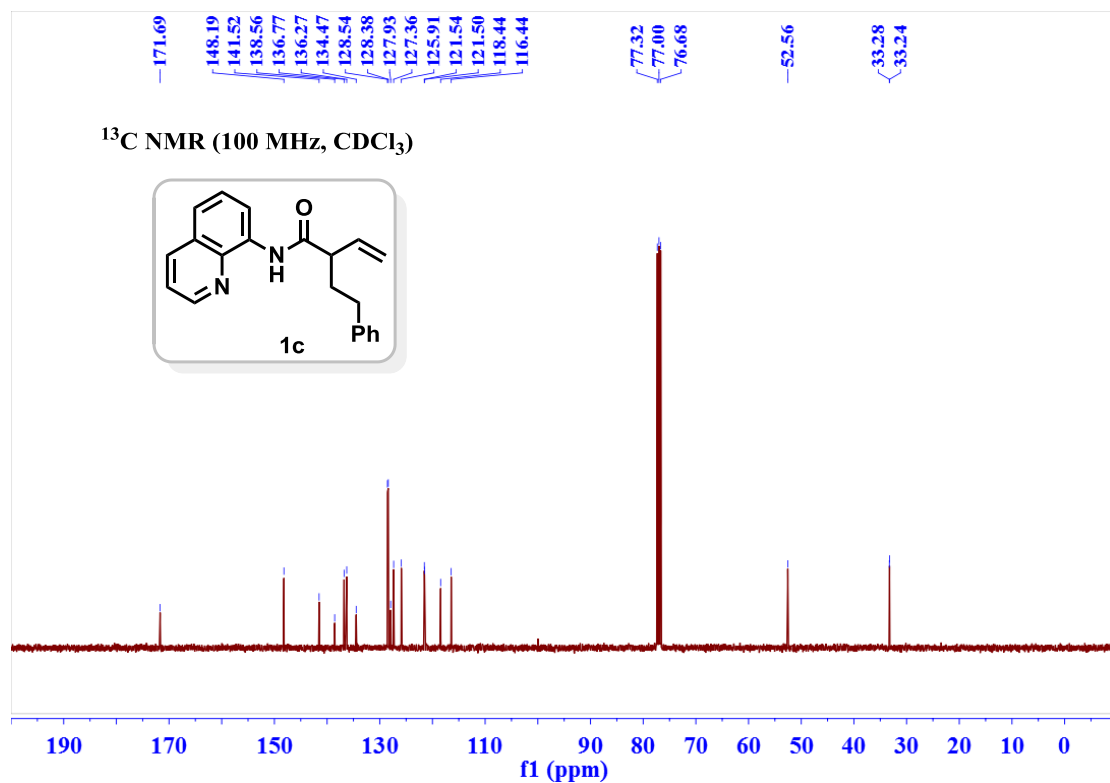

**5-methoxy-*N*-(quinolin-8-yl)-2-vinylpentanamide (1d)**

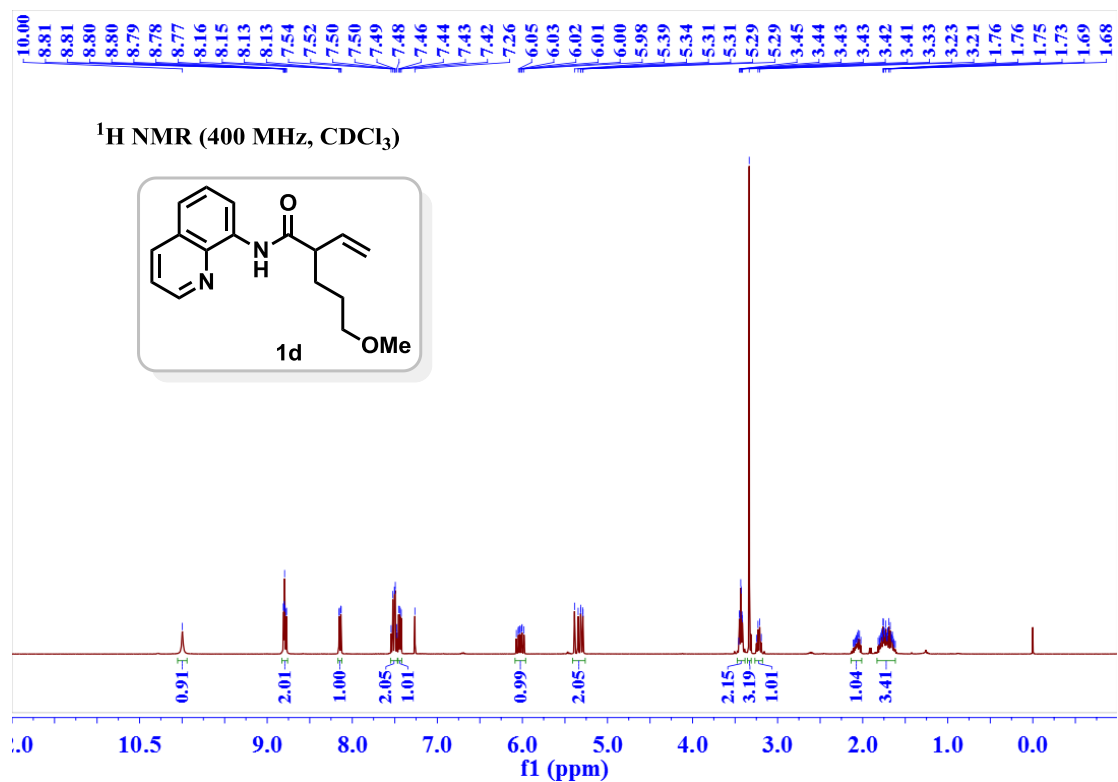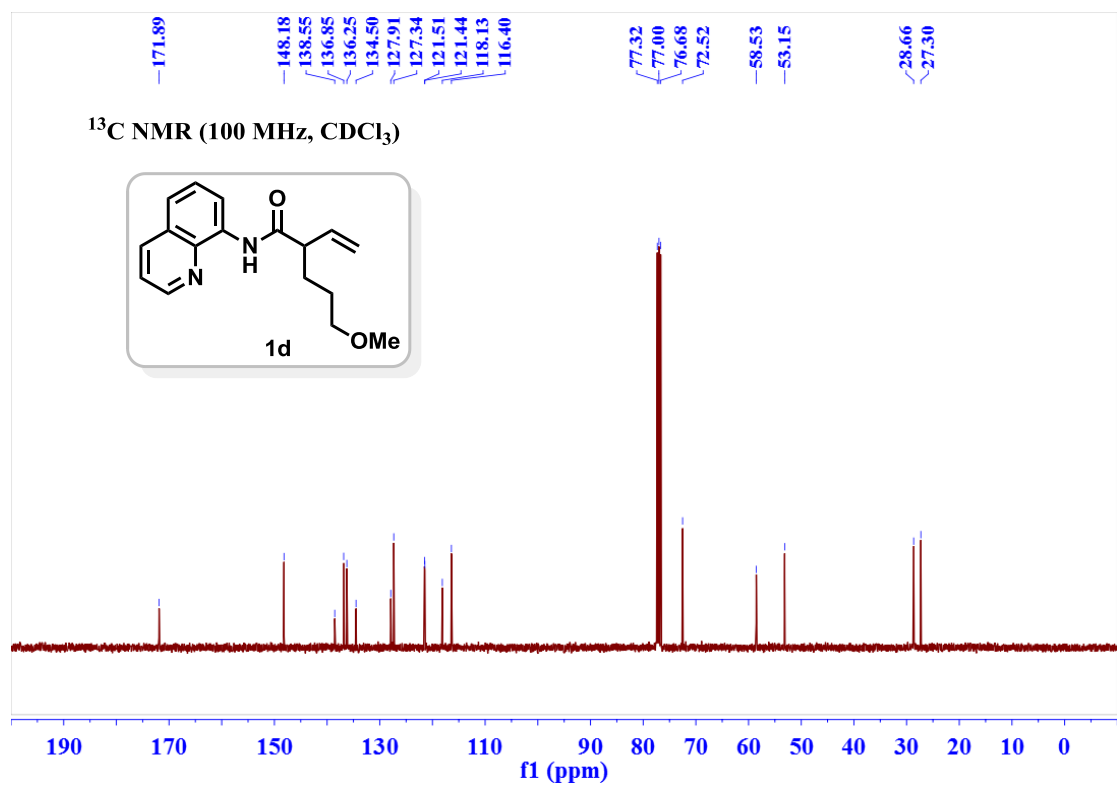

**(E)-N-(quinolin-8-yl)hept-3-enamide (1h)**

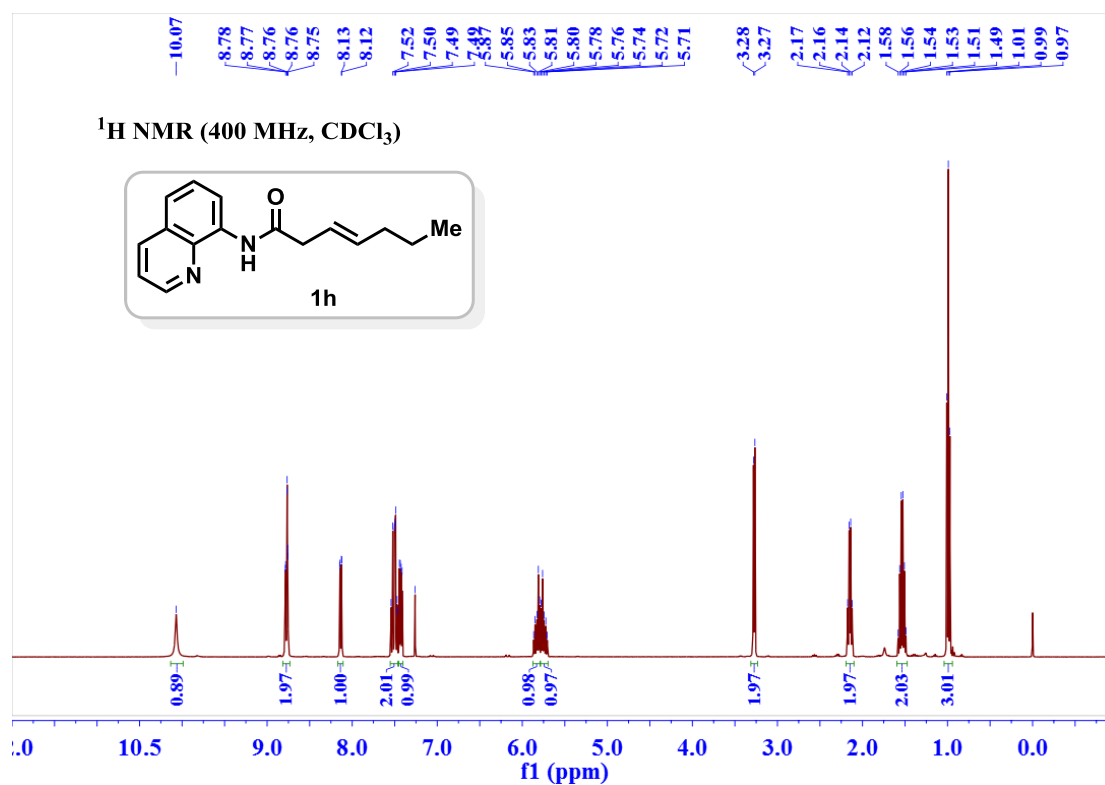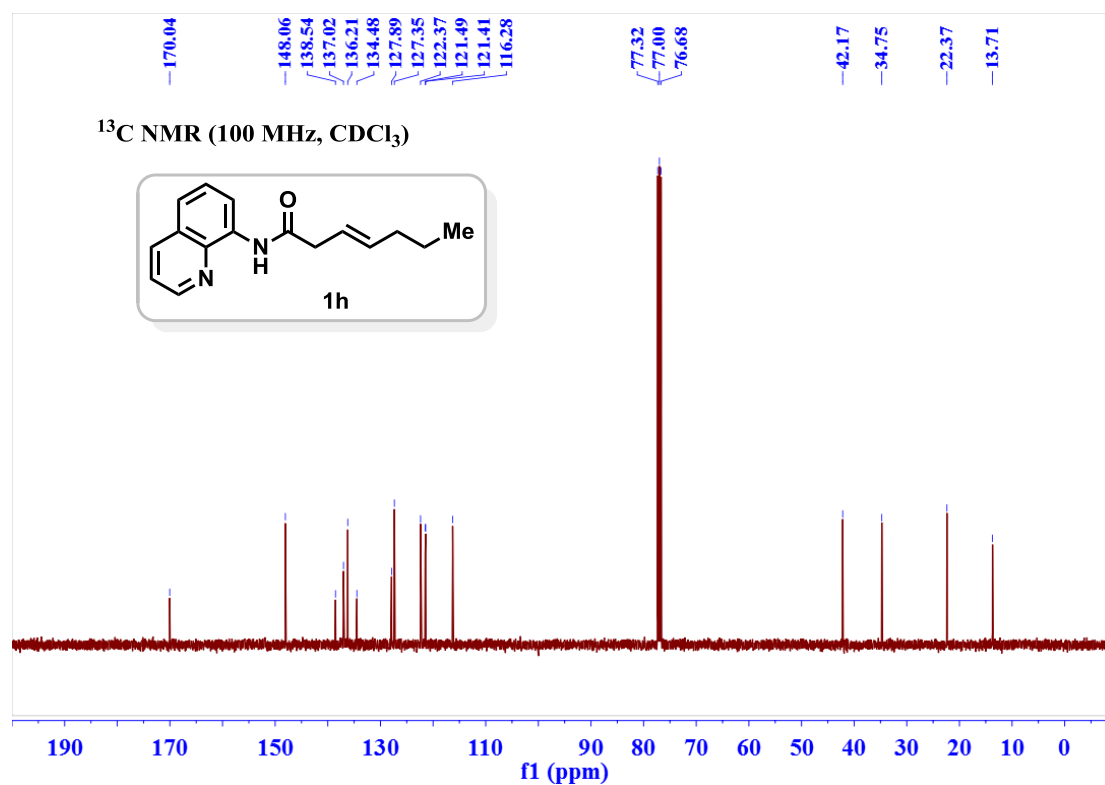

**(E)-8-chloro-N-(quinolin-8-yl)oct-3-enamide (1k)**

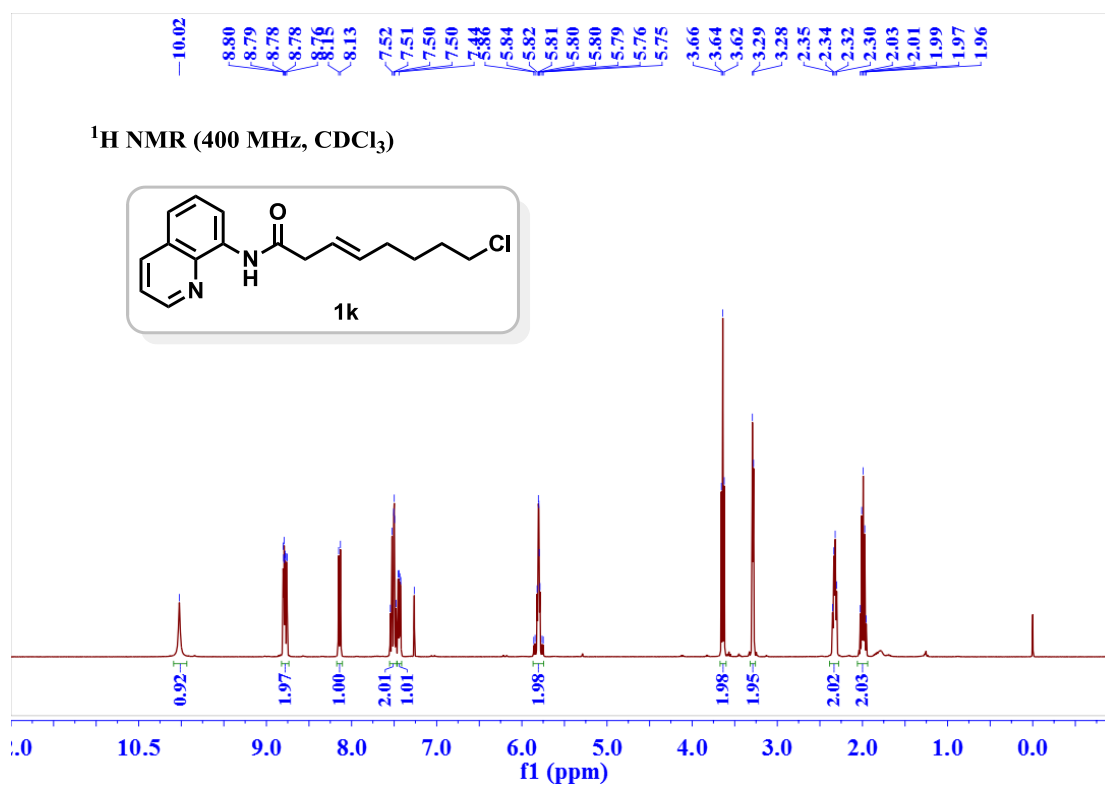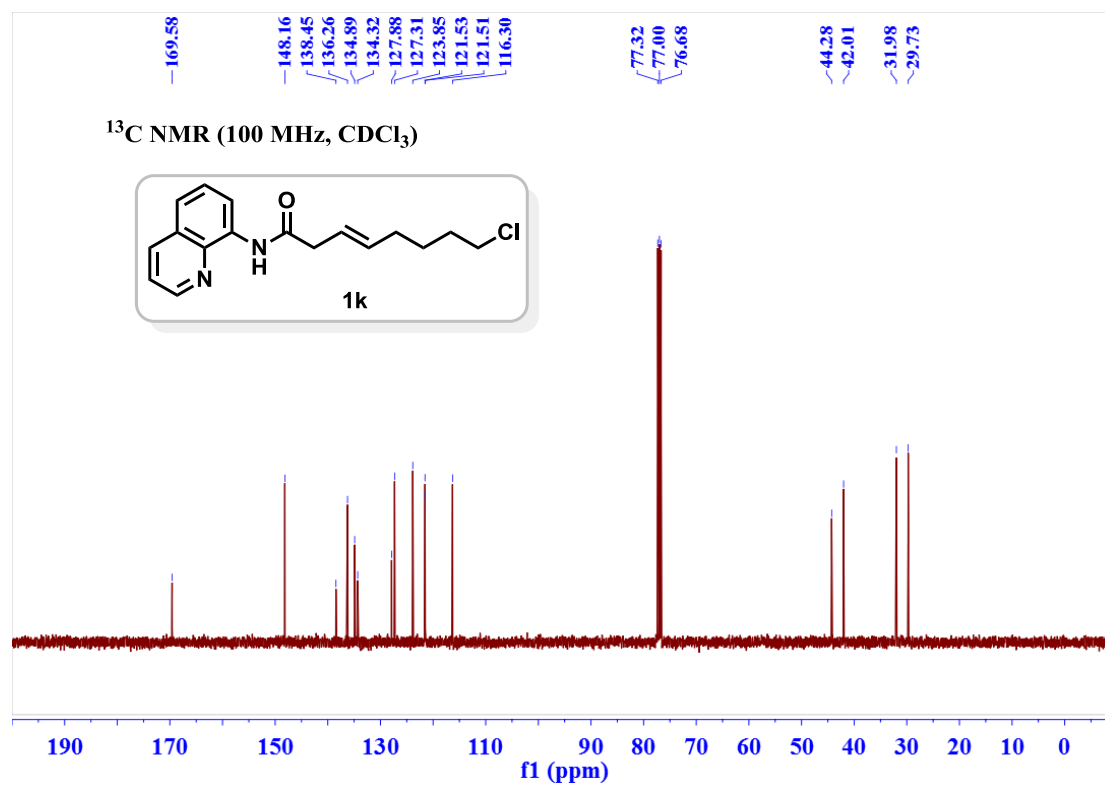

**(*E*)-*N*-(quinolin-8-yl)trideca-3,12-dienamide (11)**

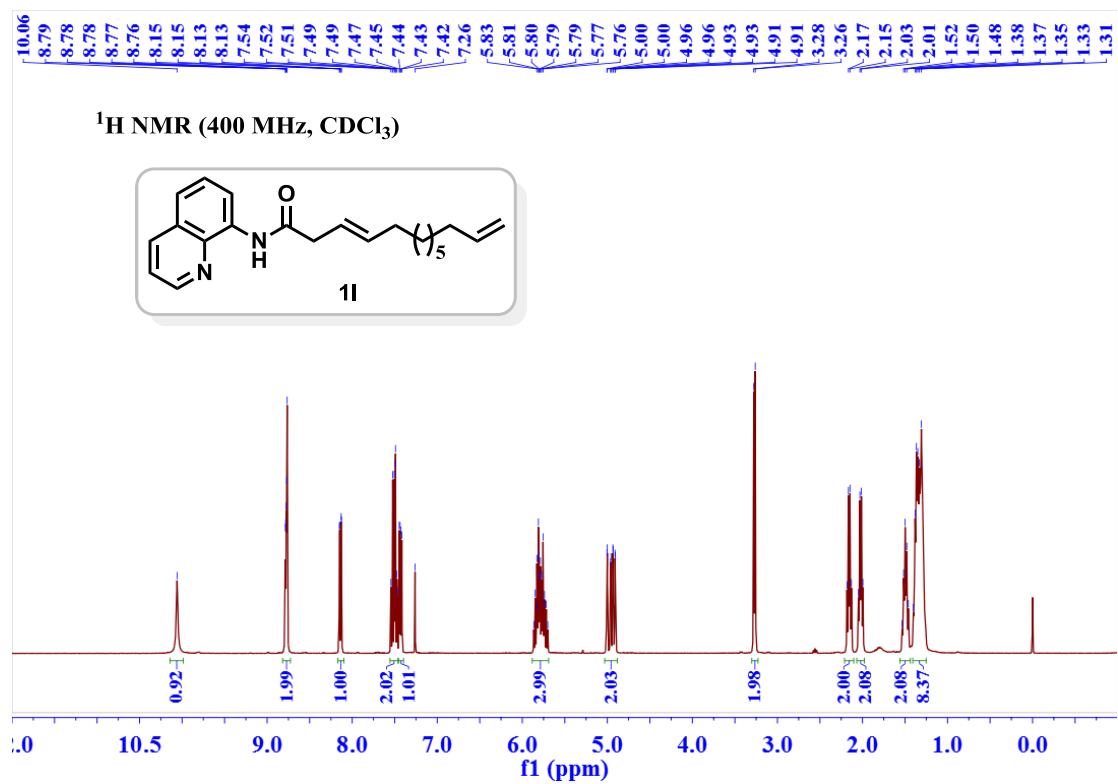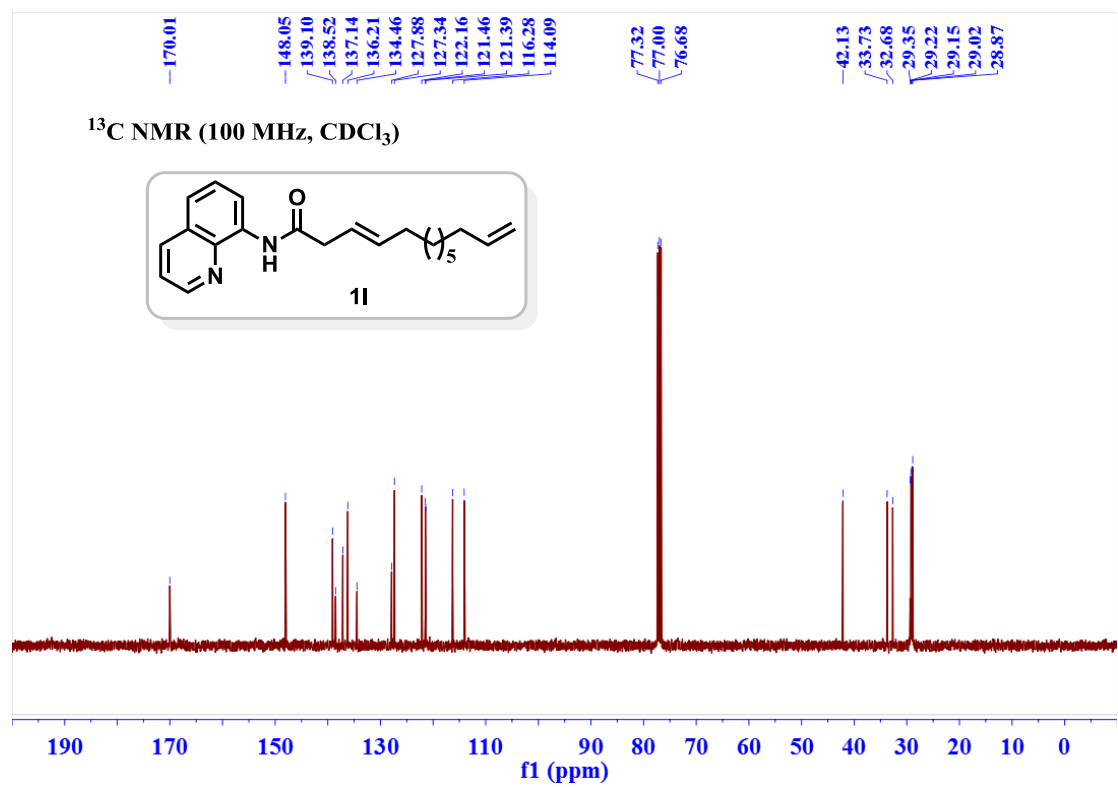

**(E)-N-(quinolin-8-yl)dec-3-enamide (1o)**

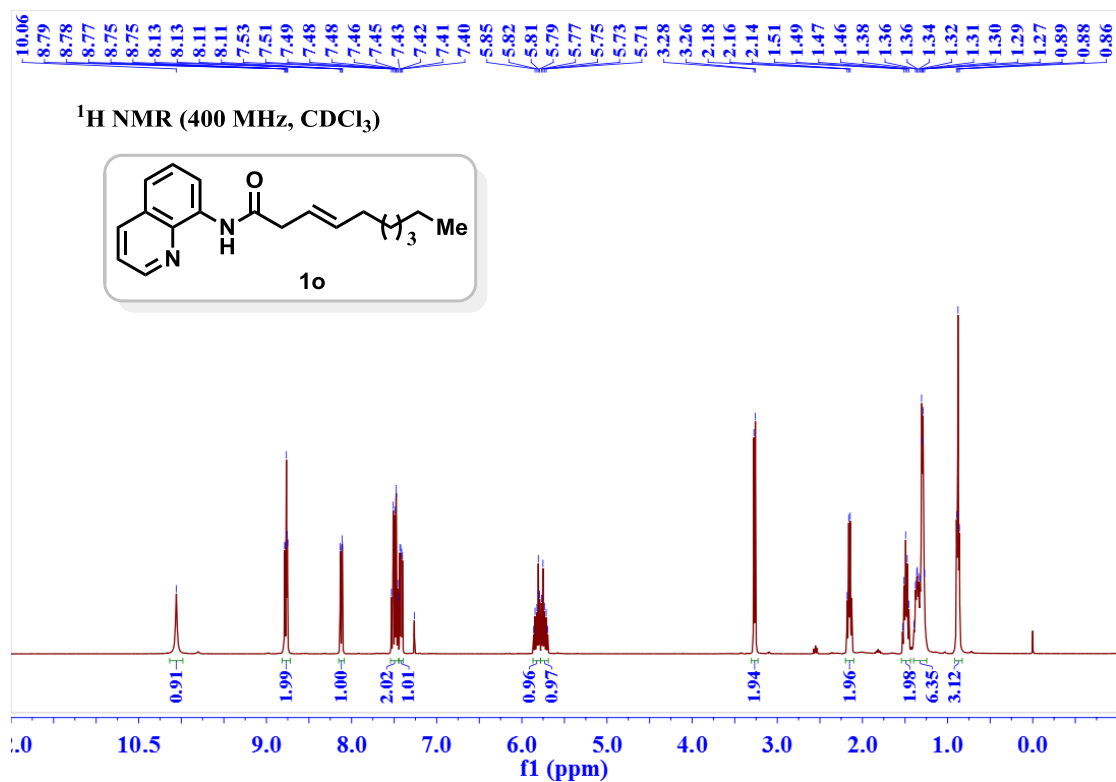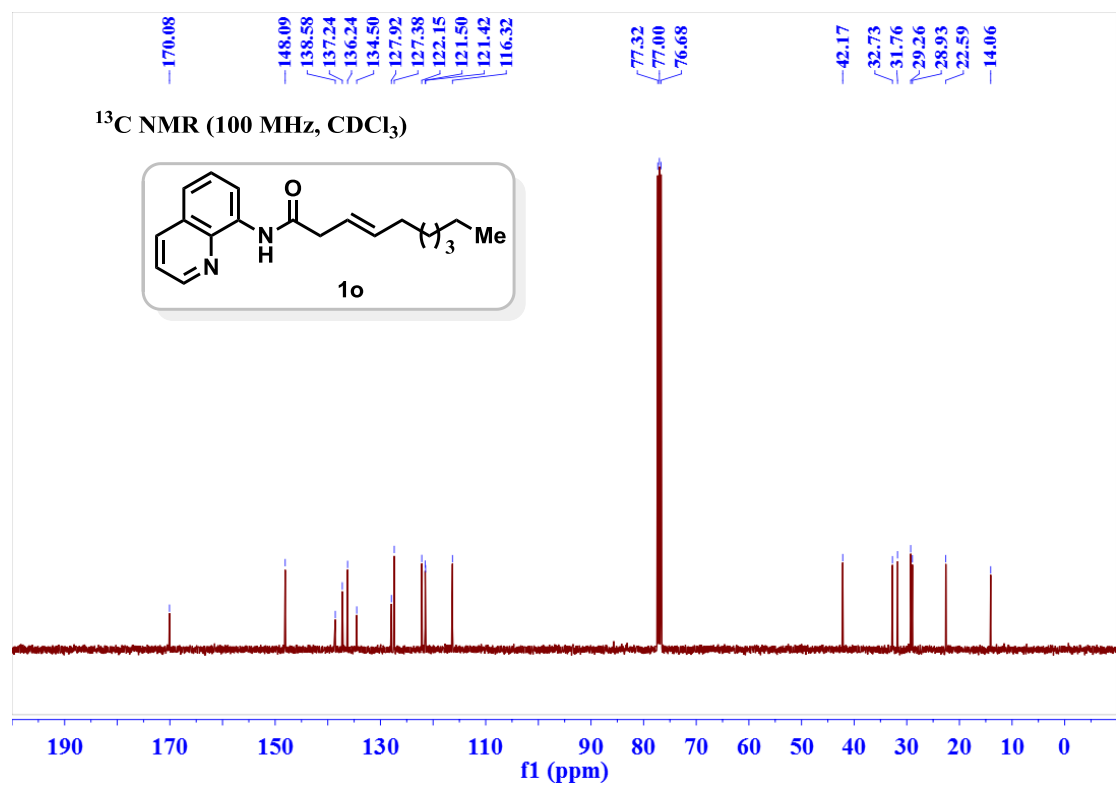

**(E)-N-(quinolin-8-yl)dodec-3-enamide (1p)**

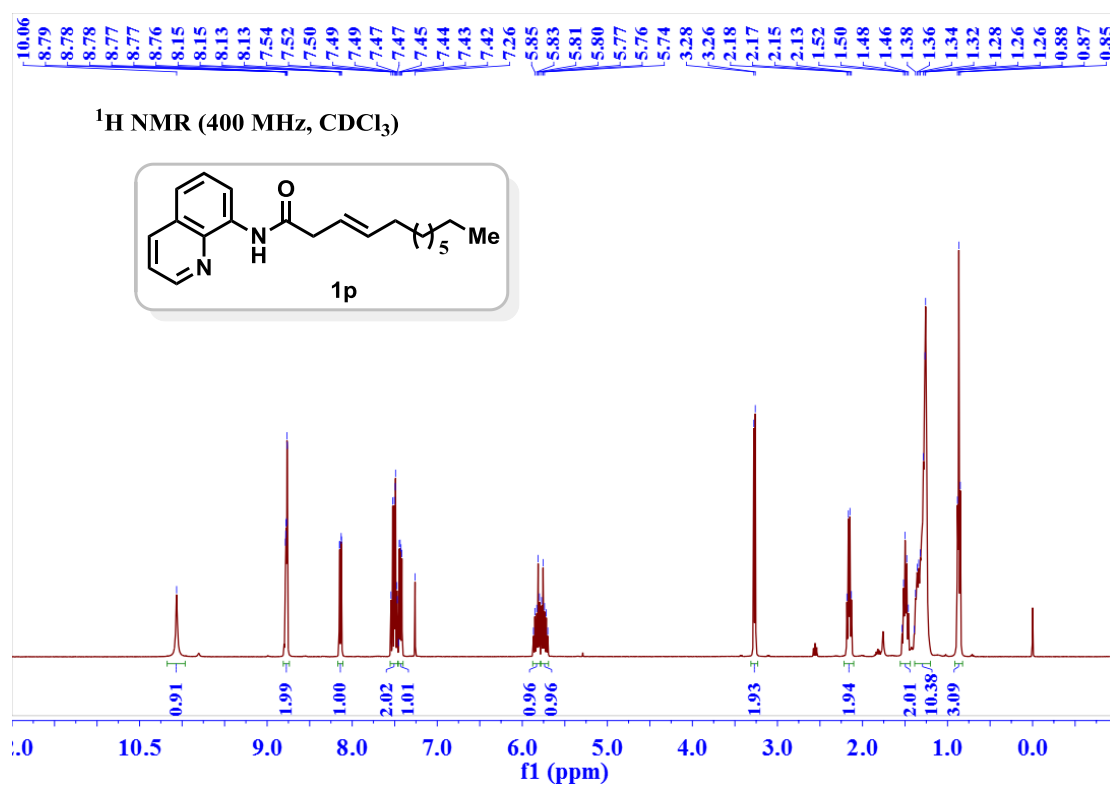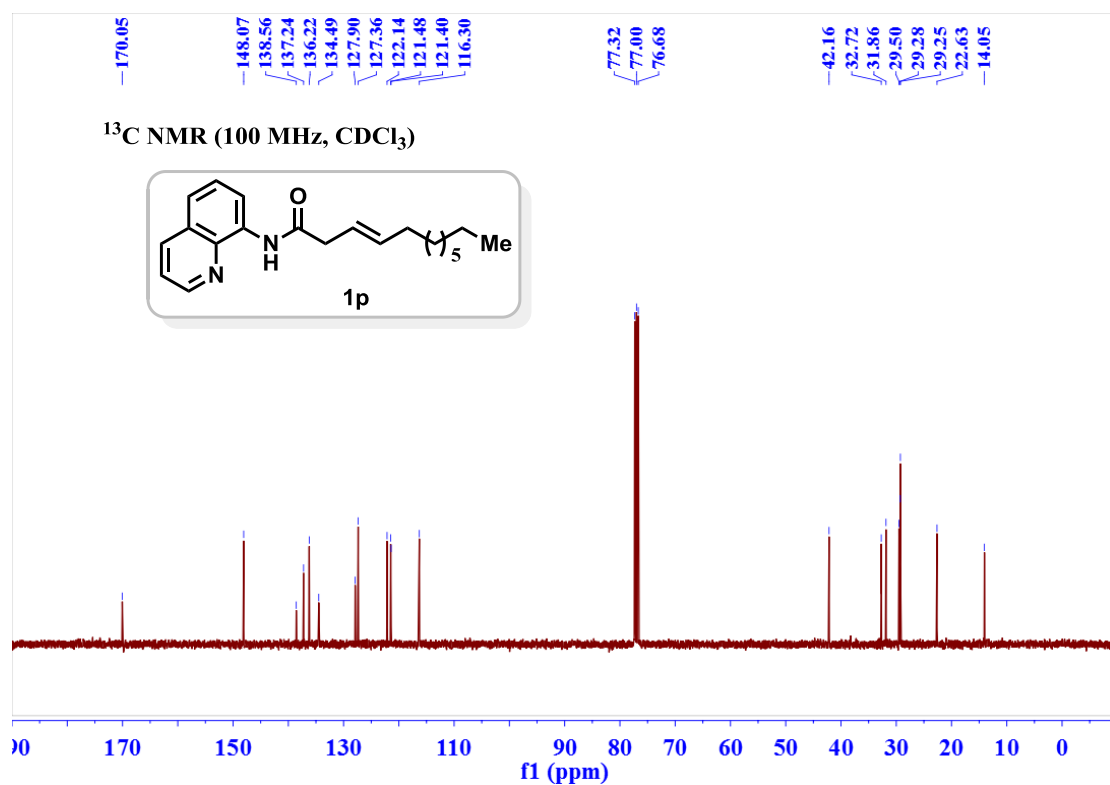

**(*E*)-*N*-(quinolin-8-yl)tetradec-3-enamide (1q)**

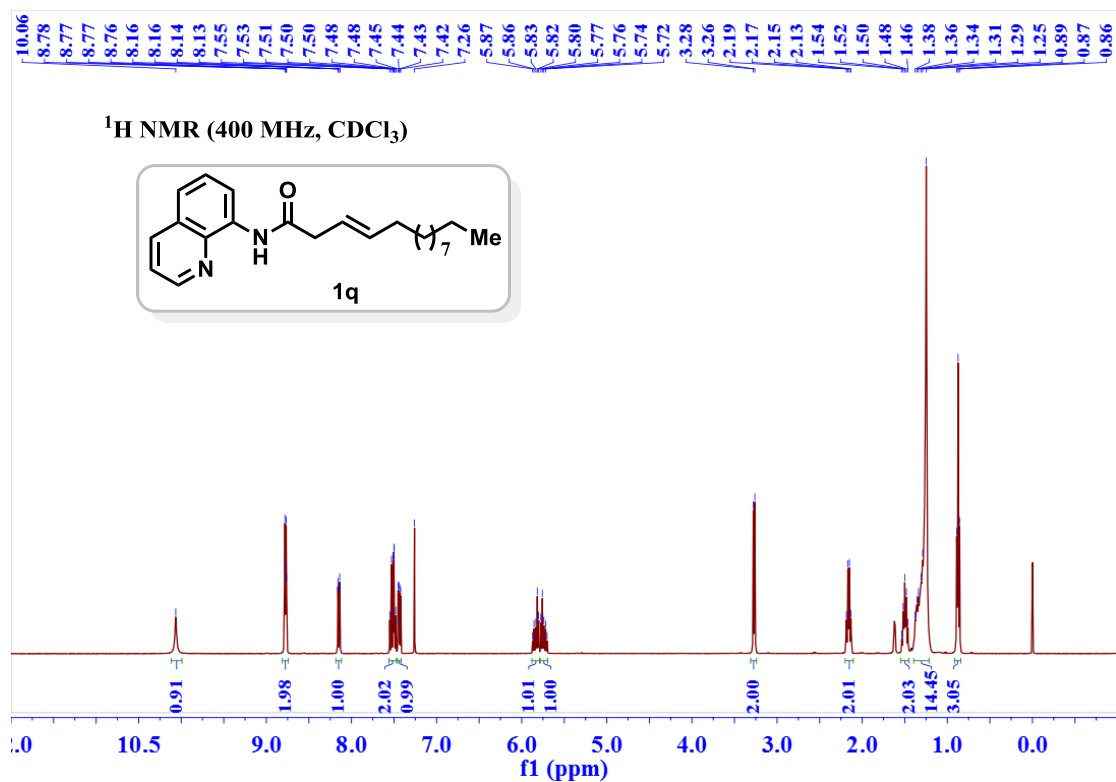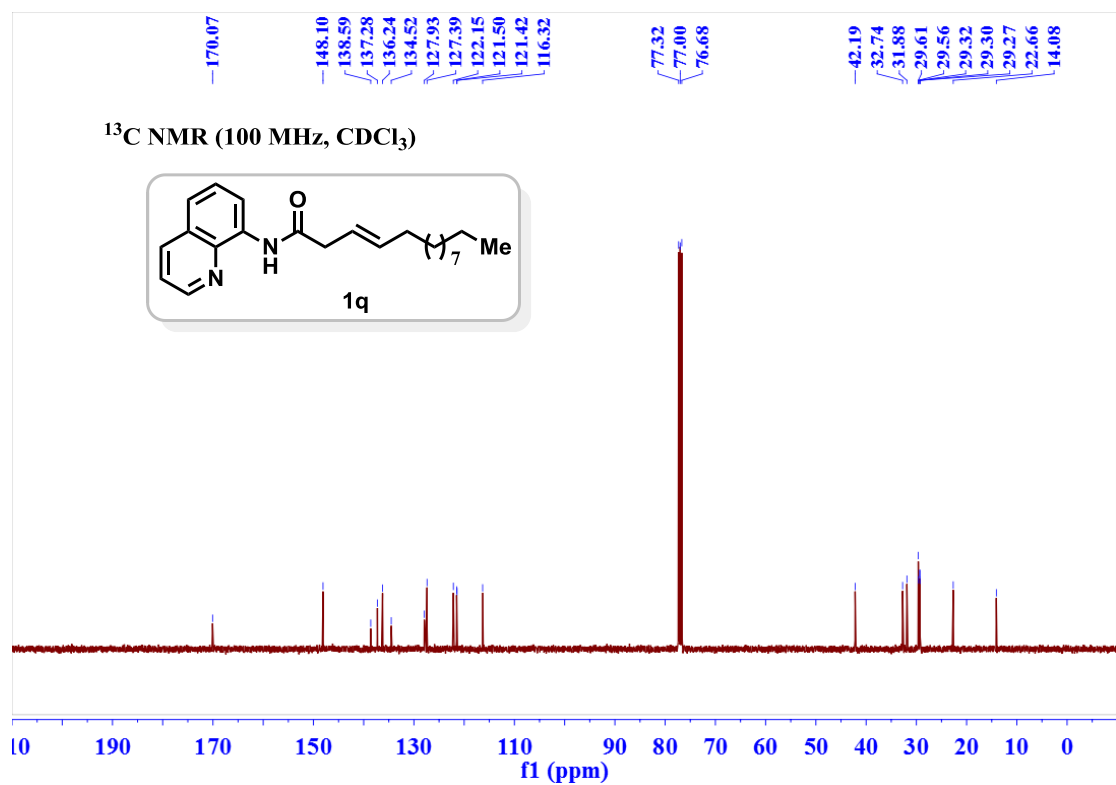



**(*E*)-4-(4-(*tert*-butyl)phenyl)-*N*-(quinolin-8-yl)but-3-enamide (1s)**

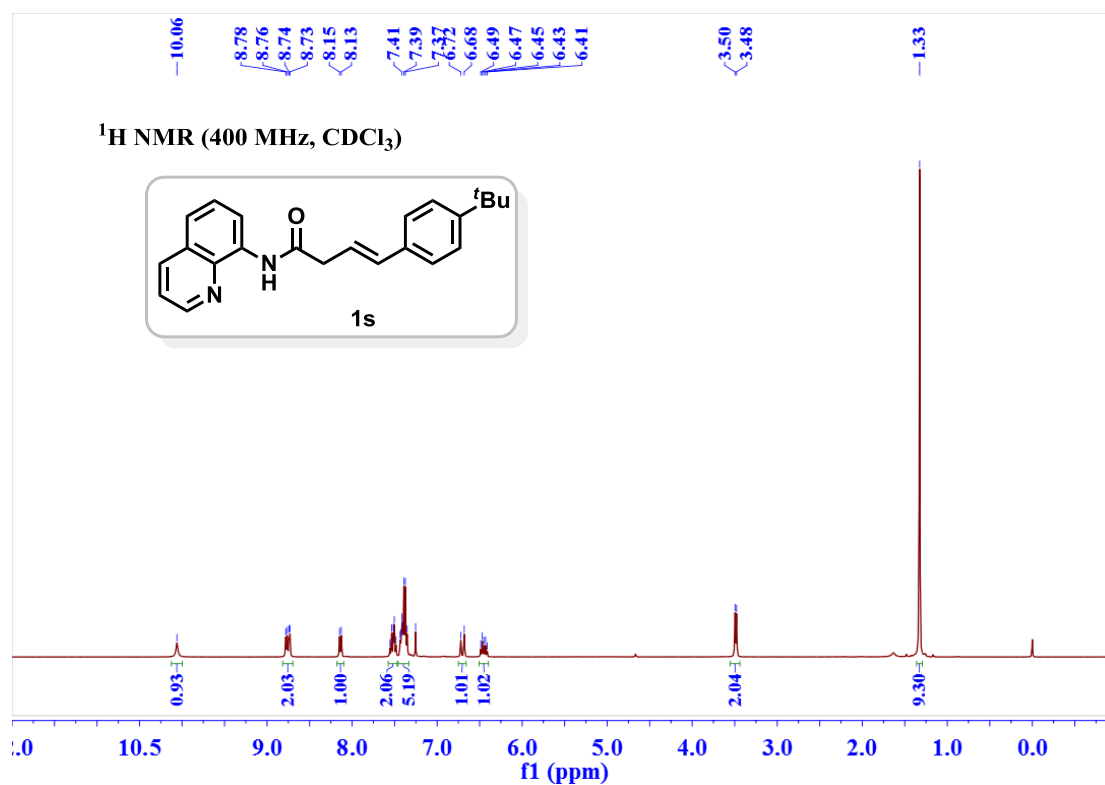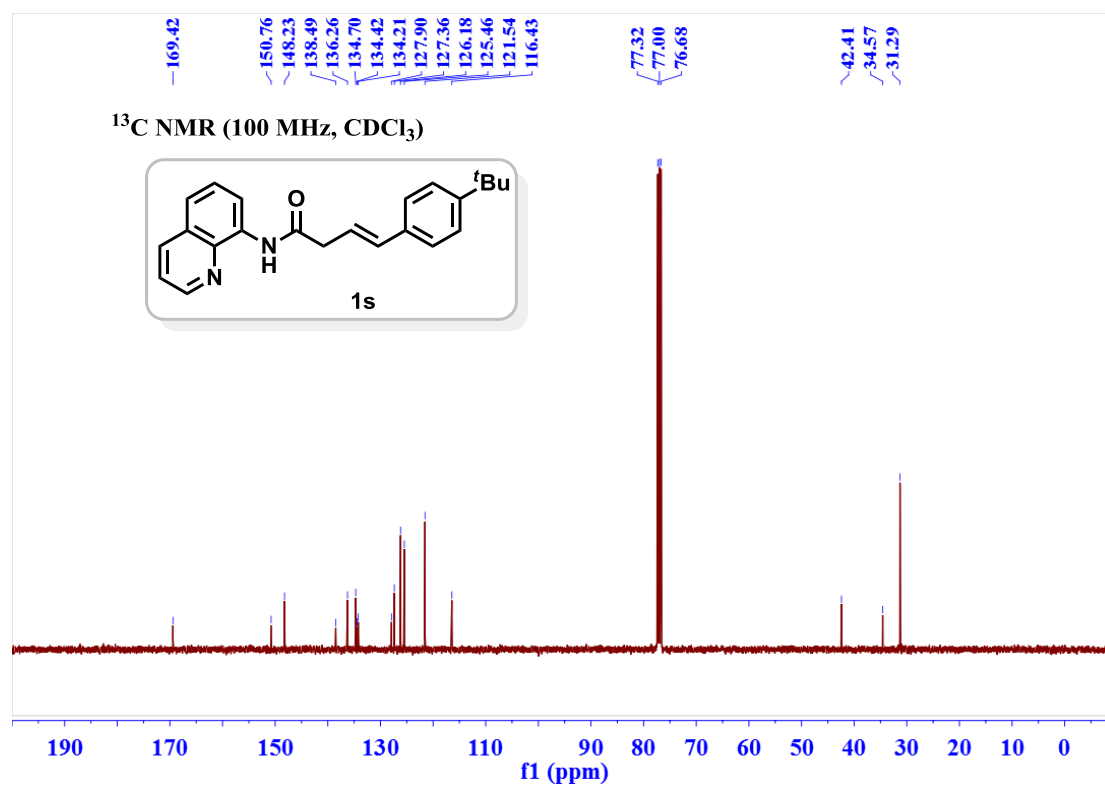

**(*E*)-4-(naphthalen-2-yl)-*N*-(quinolin-8-yl)but-3-enamide (1t)**

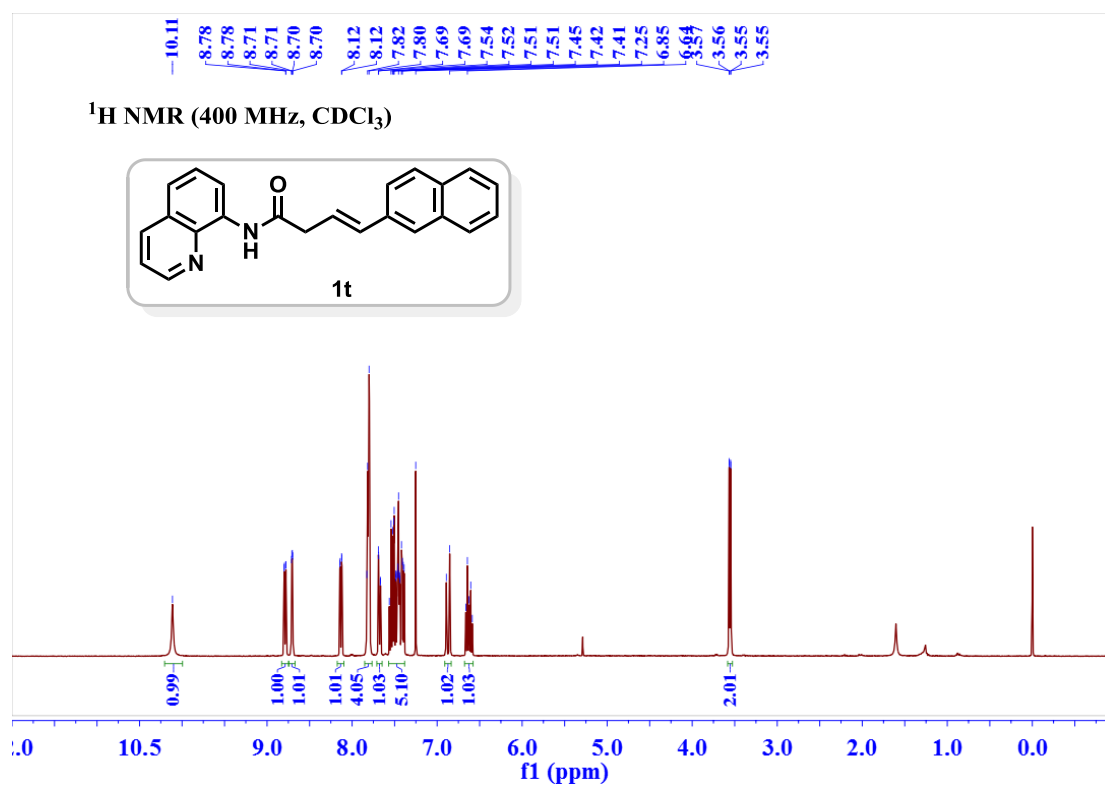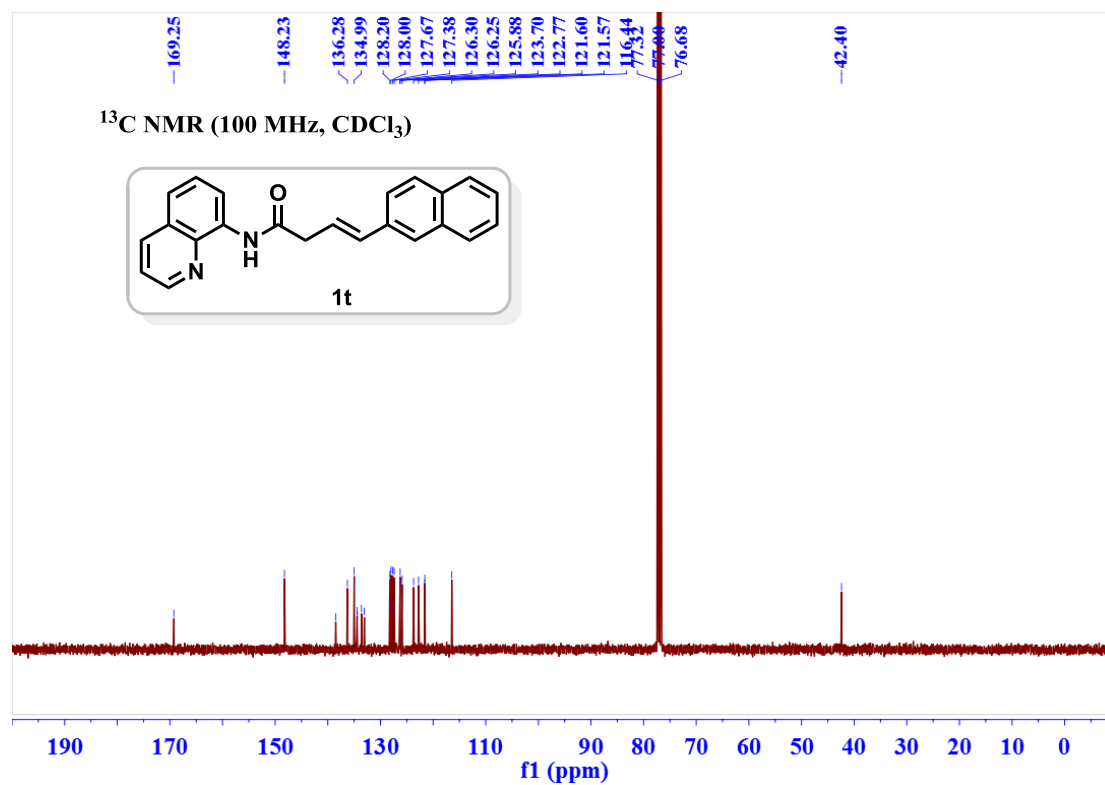

# 4-phenyl-N-(quinolin-8-yl)butanamide (3a)

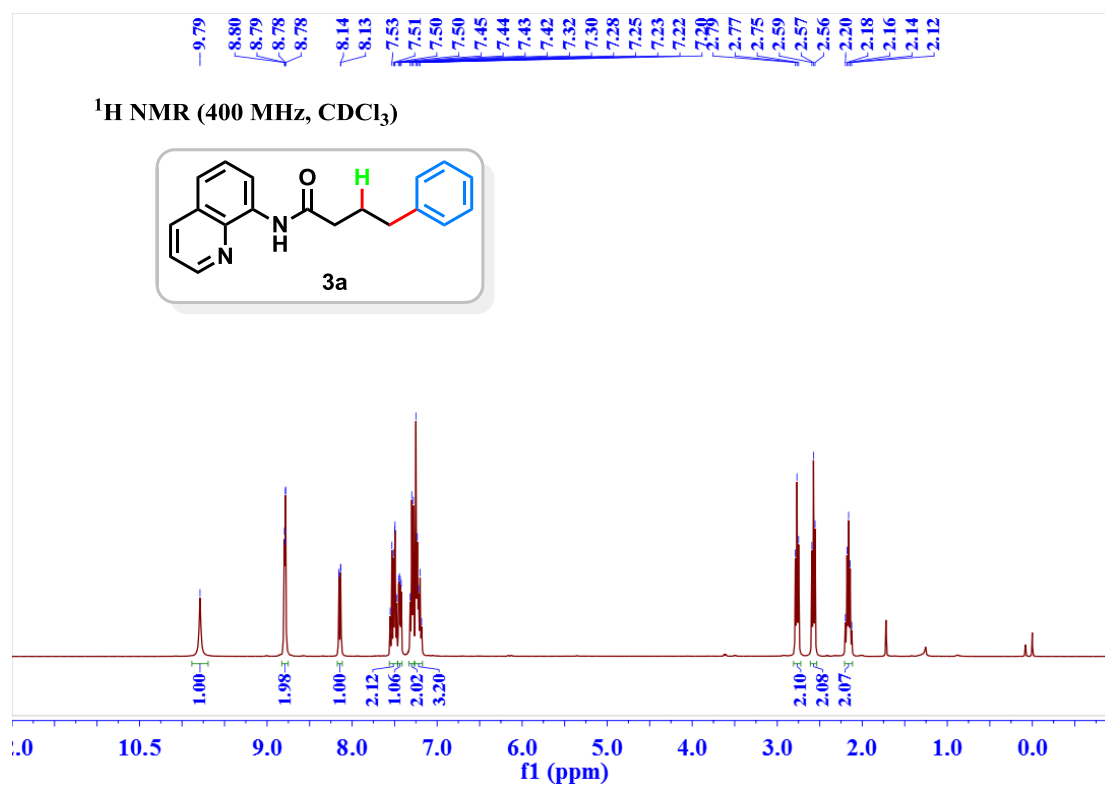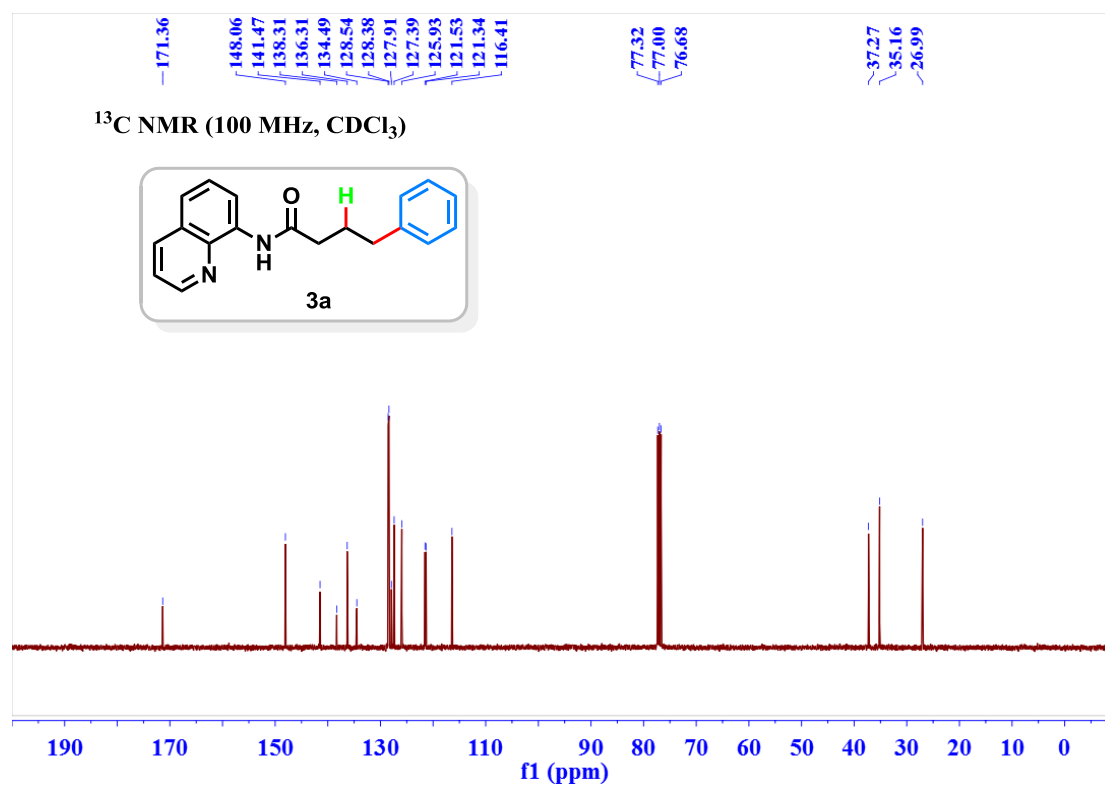

***N*-(quinolin-8-yl)-4-(*o*-tolyl)butanamide (3b)**

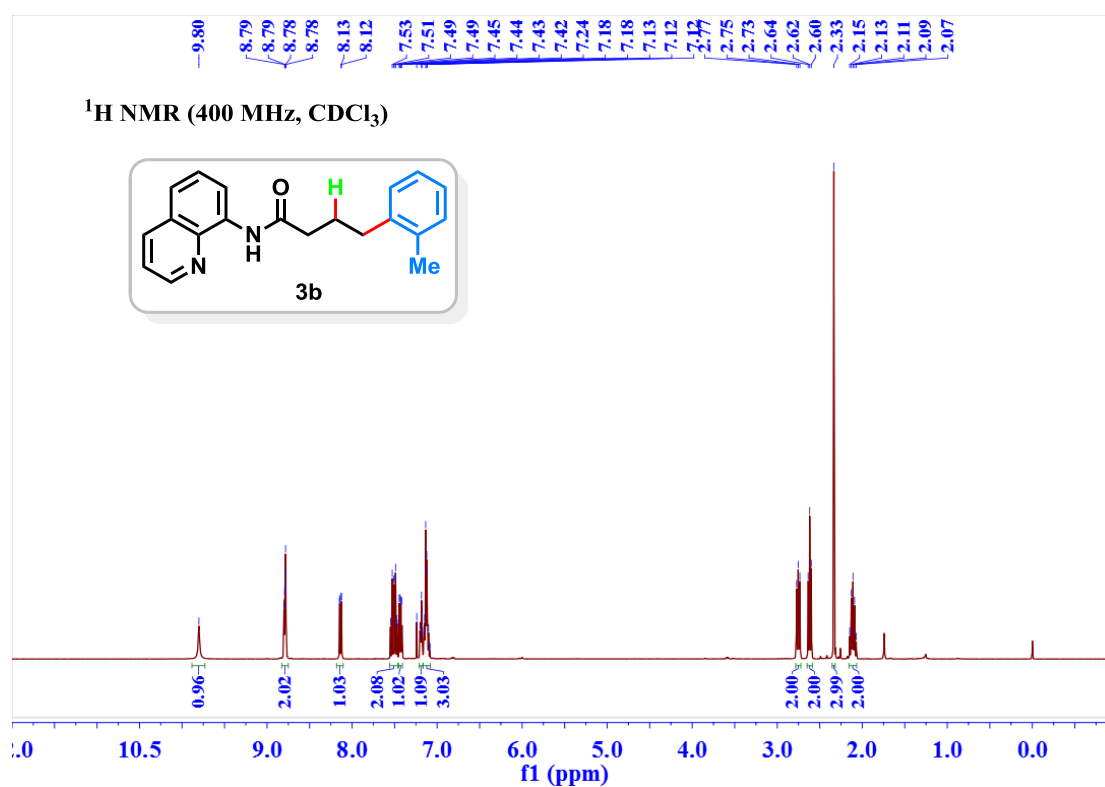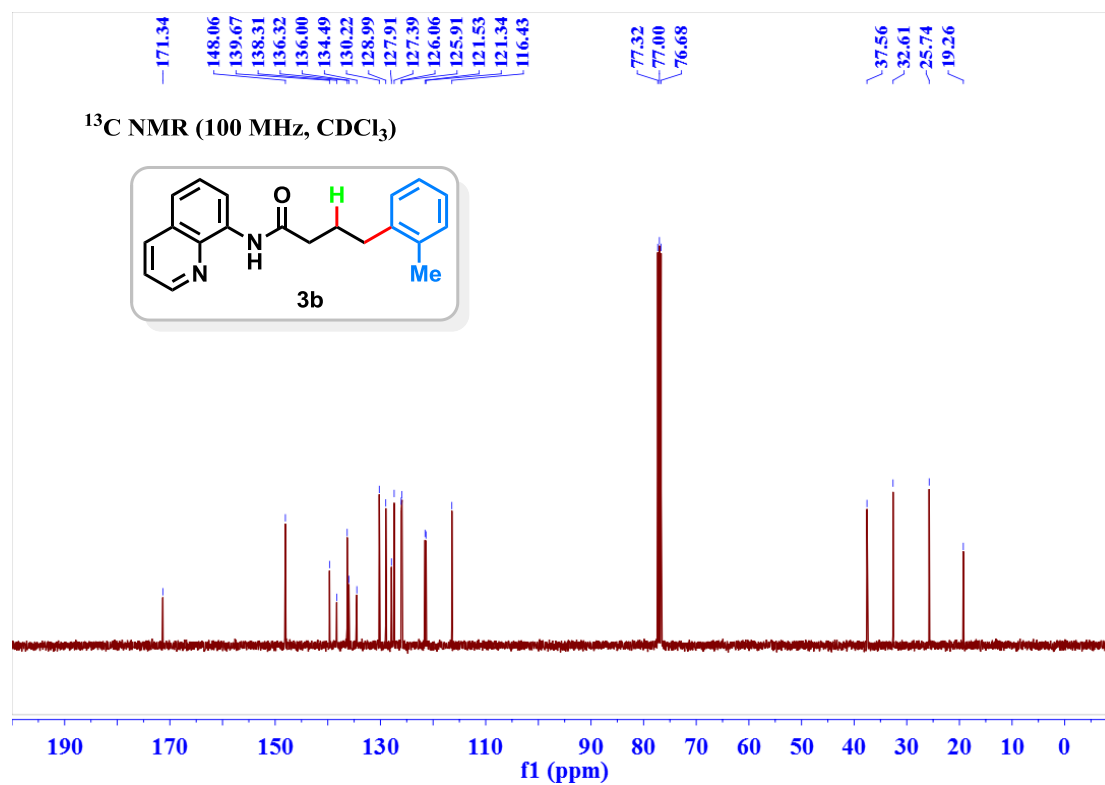

# 4-(2-methoxyphenyl)-*N*-(quinolin-8-yl)butanamide (3c)

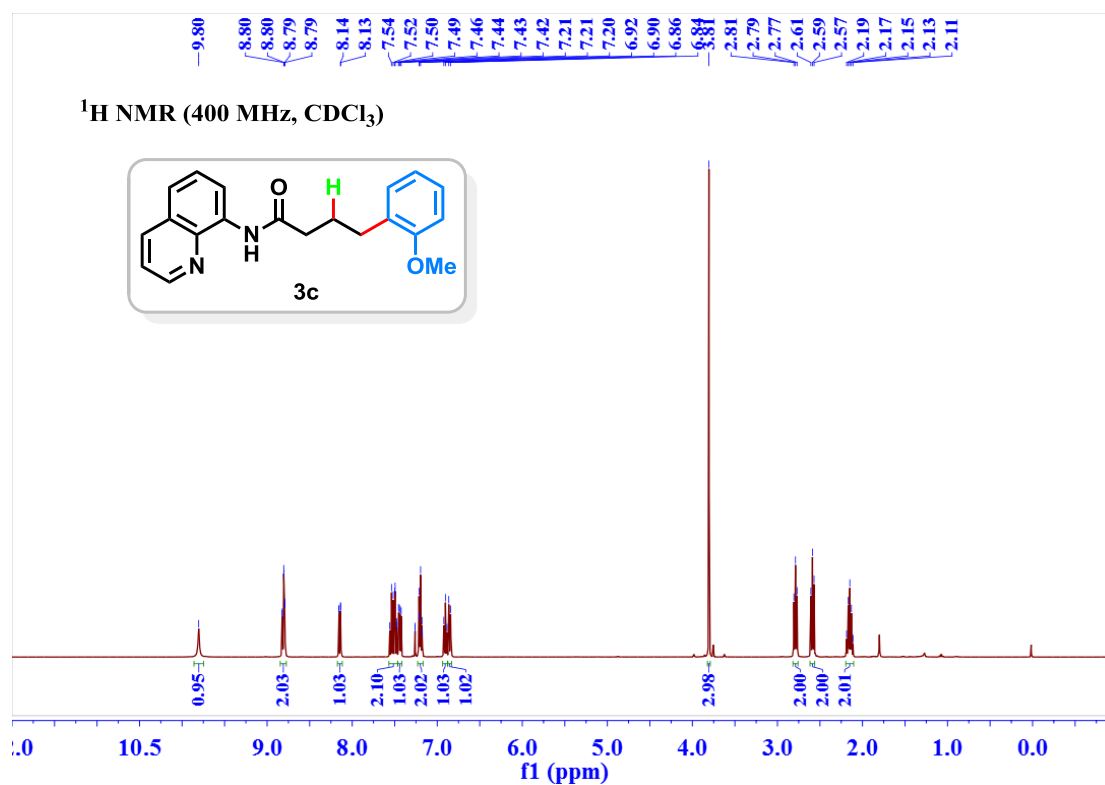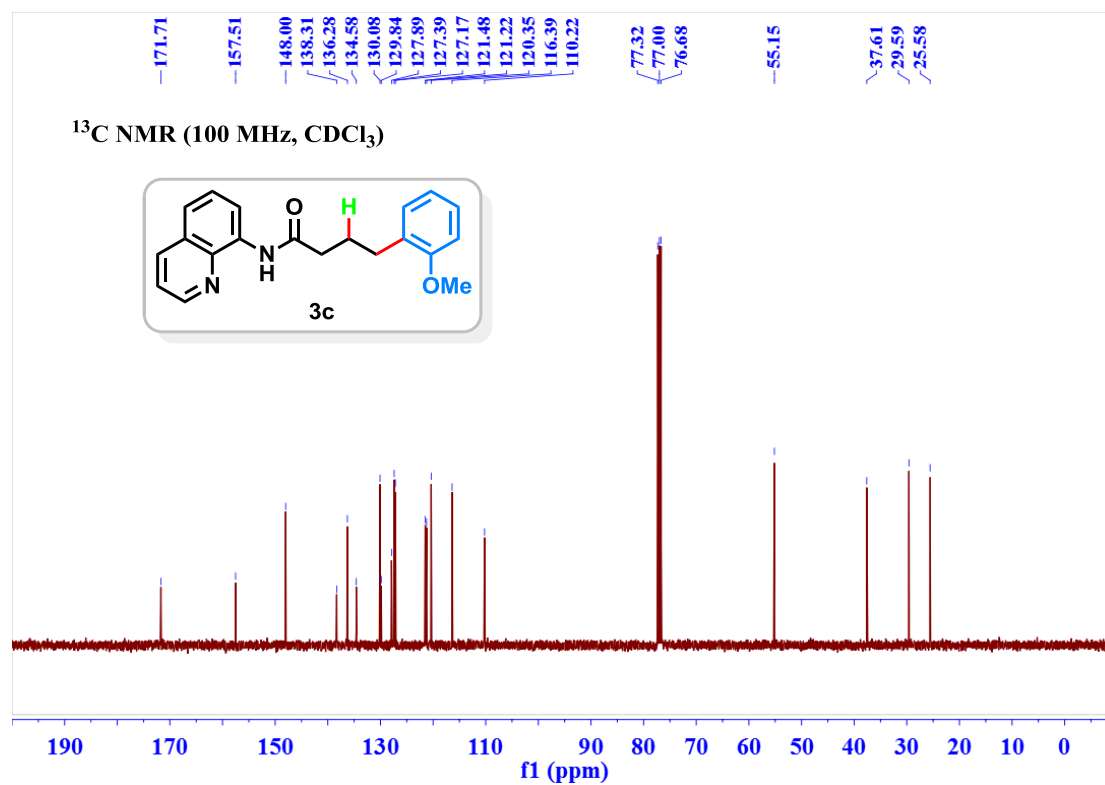

***N*-(quinolin-8-yl)-4-(2-(trifluoromethyl)phenyl)butanamide (3d)**

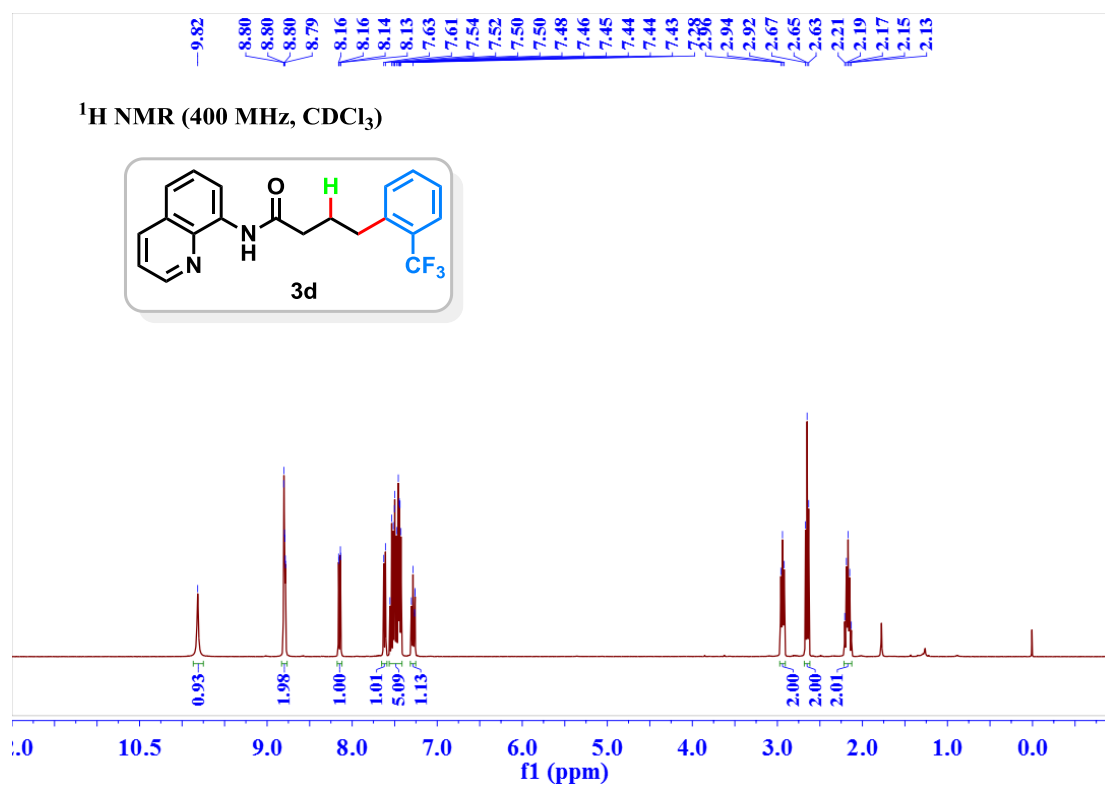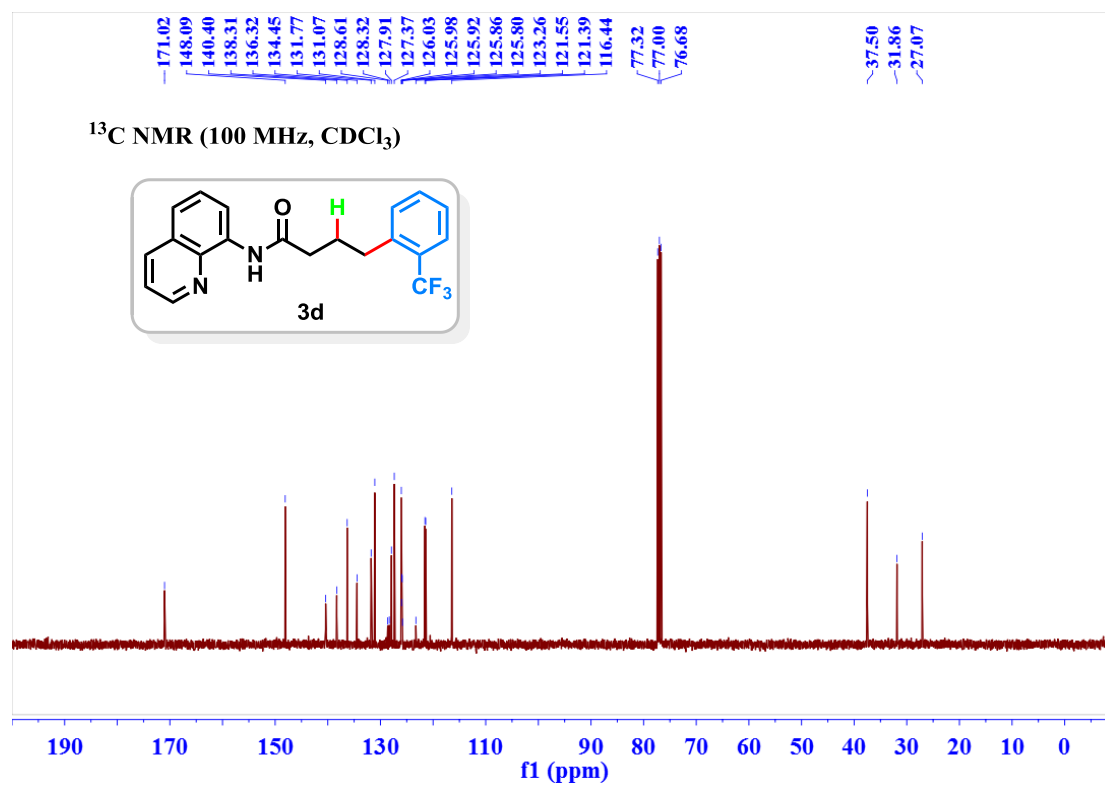

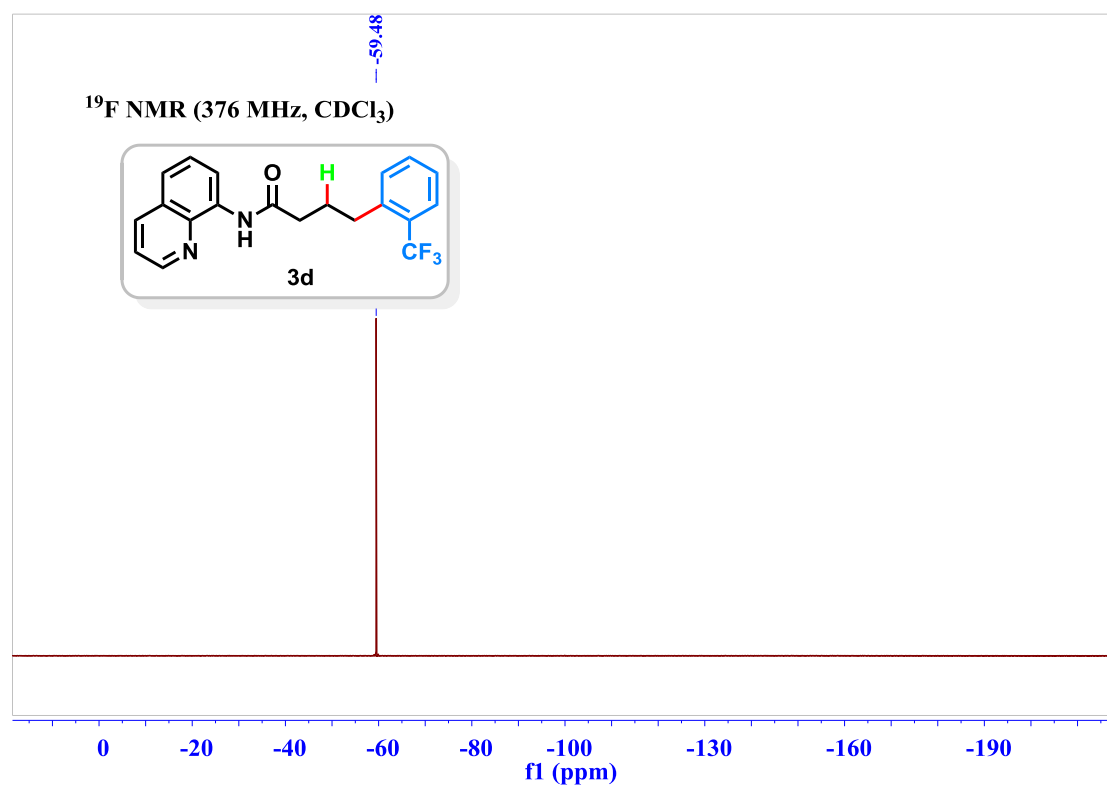

***N*-(quinolin-8-yl)-4-(2-(trifluoromethoxy)phenyl)butanamide (3e)**

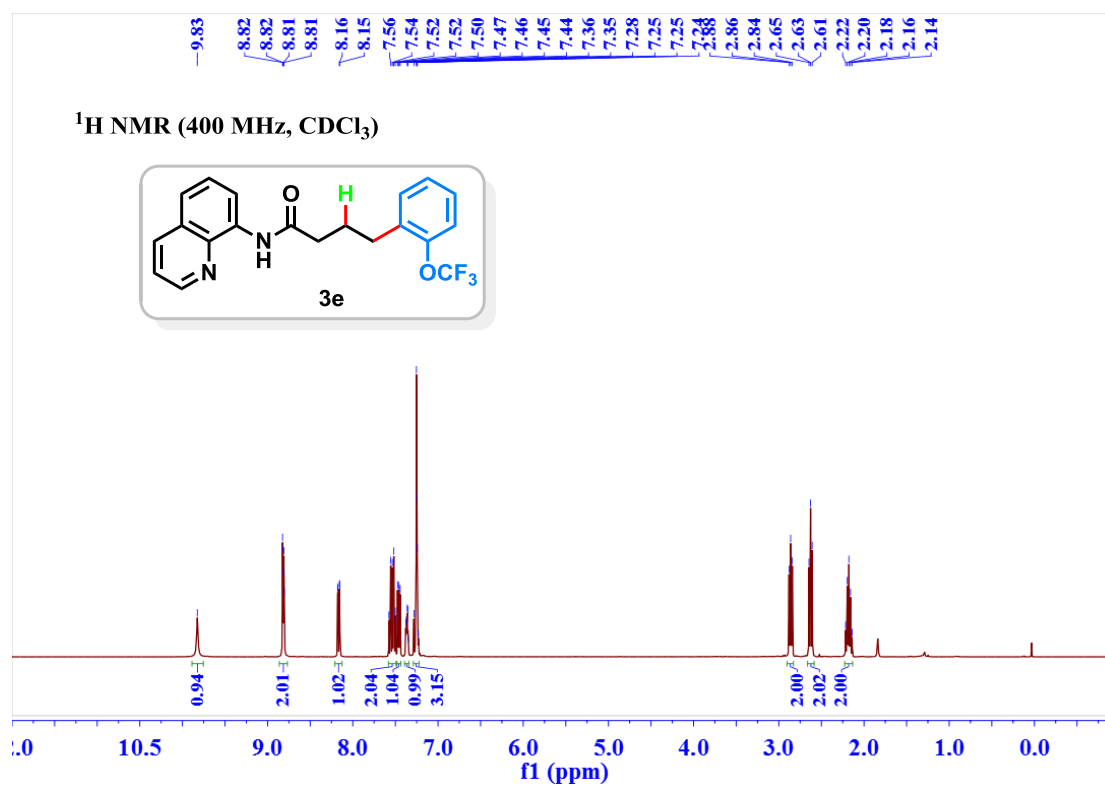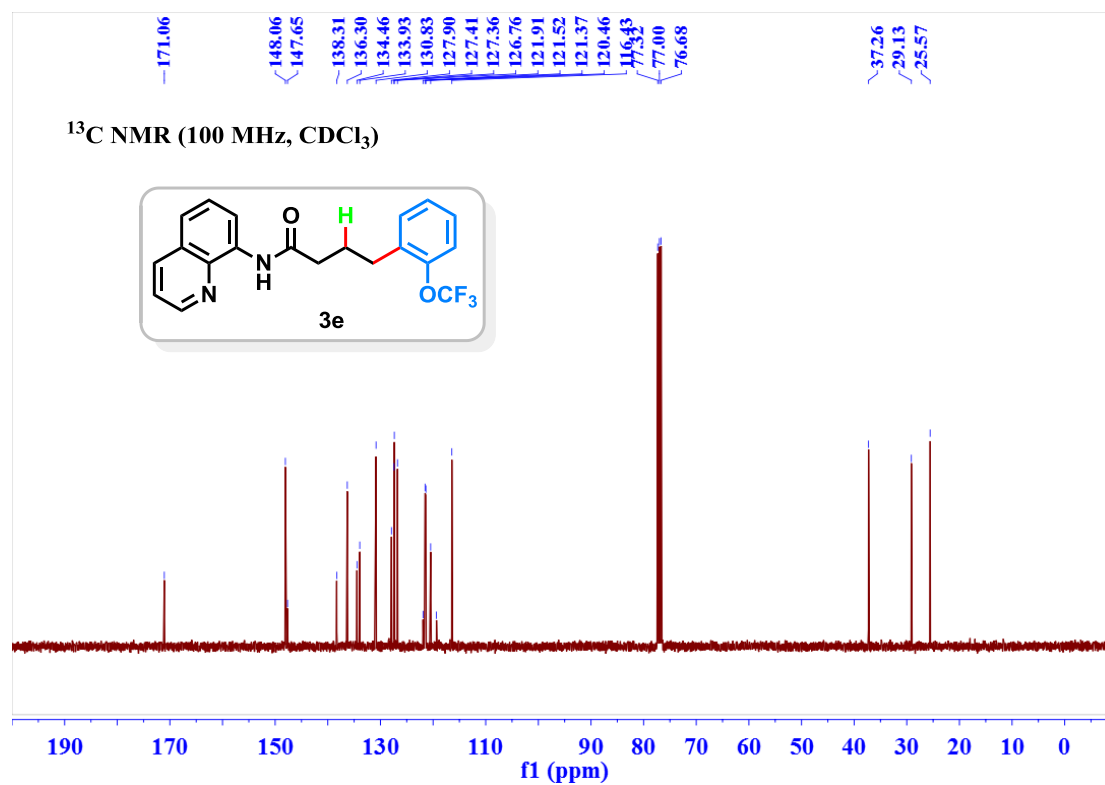



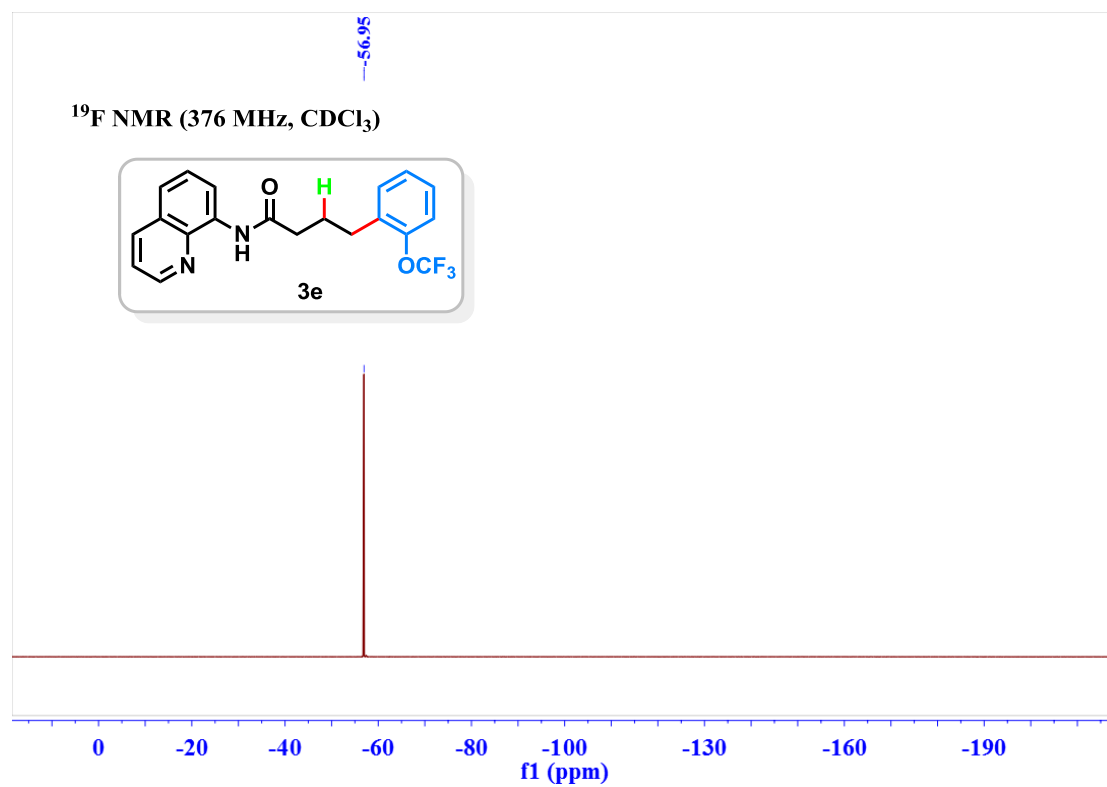

# 4-(3-fluorophenyl)-N-(quinolin-8-yl)butanamide (3f)

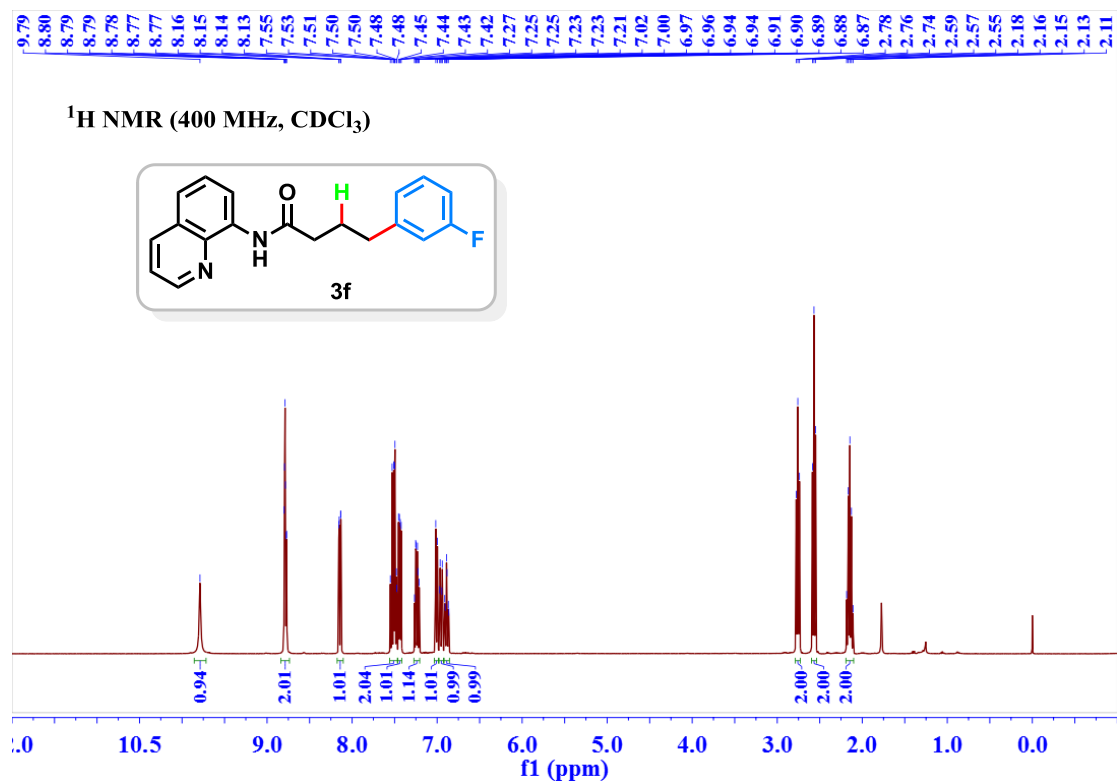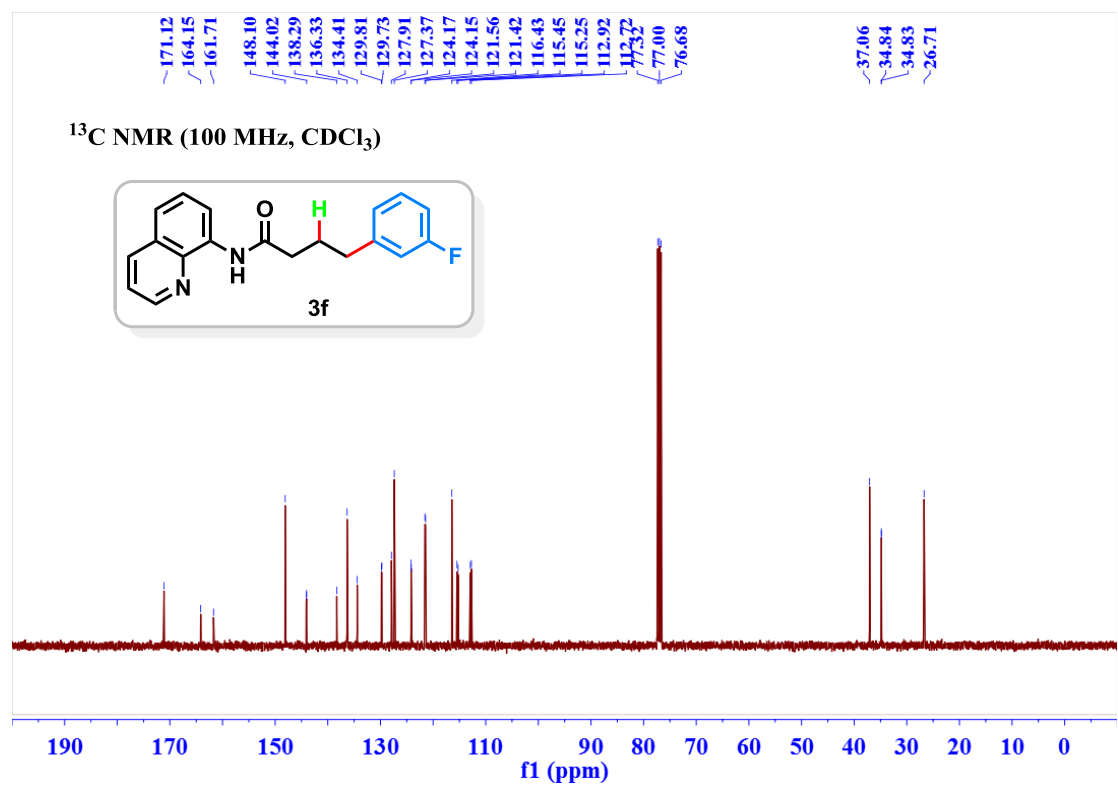

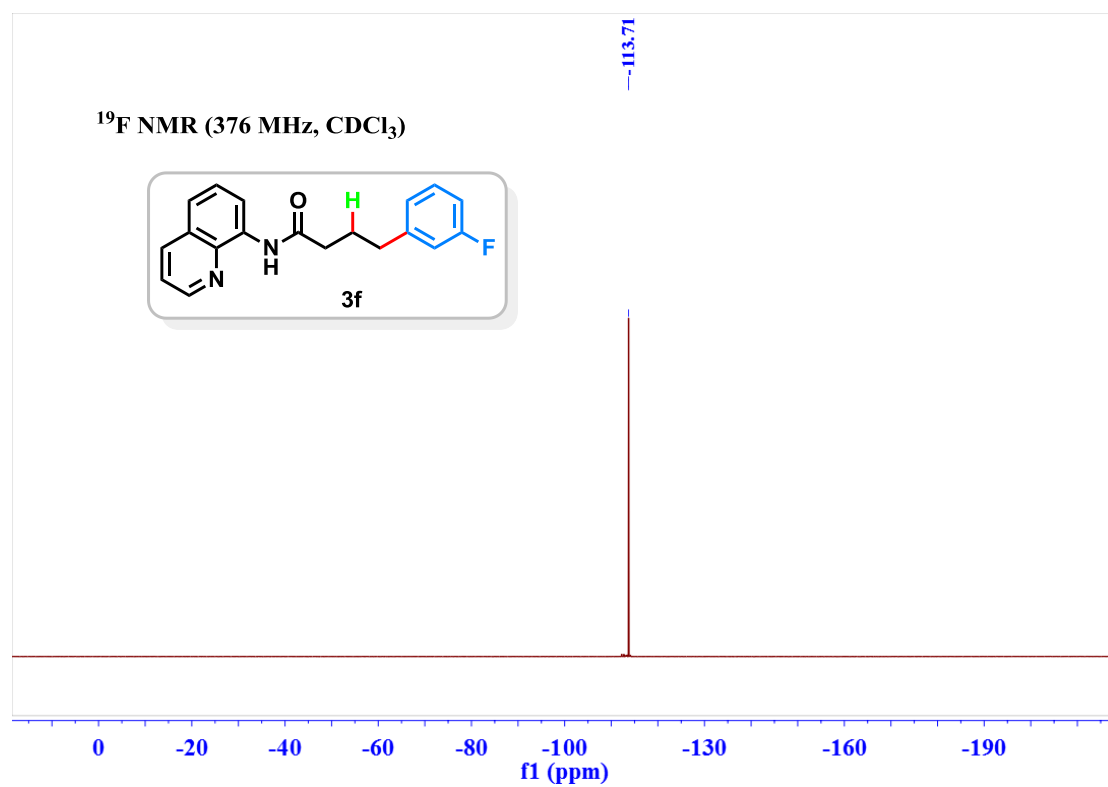

***N*-(quinolin-8-yl)-4-(*m*-tolyl)butanamide (3g)**

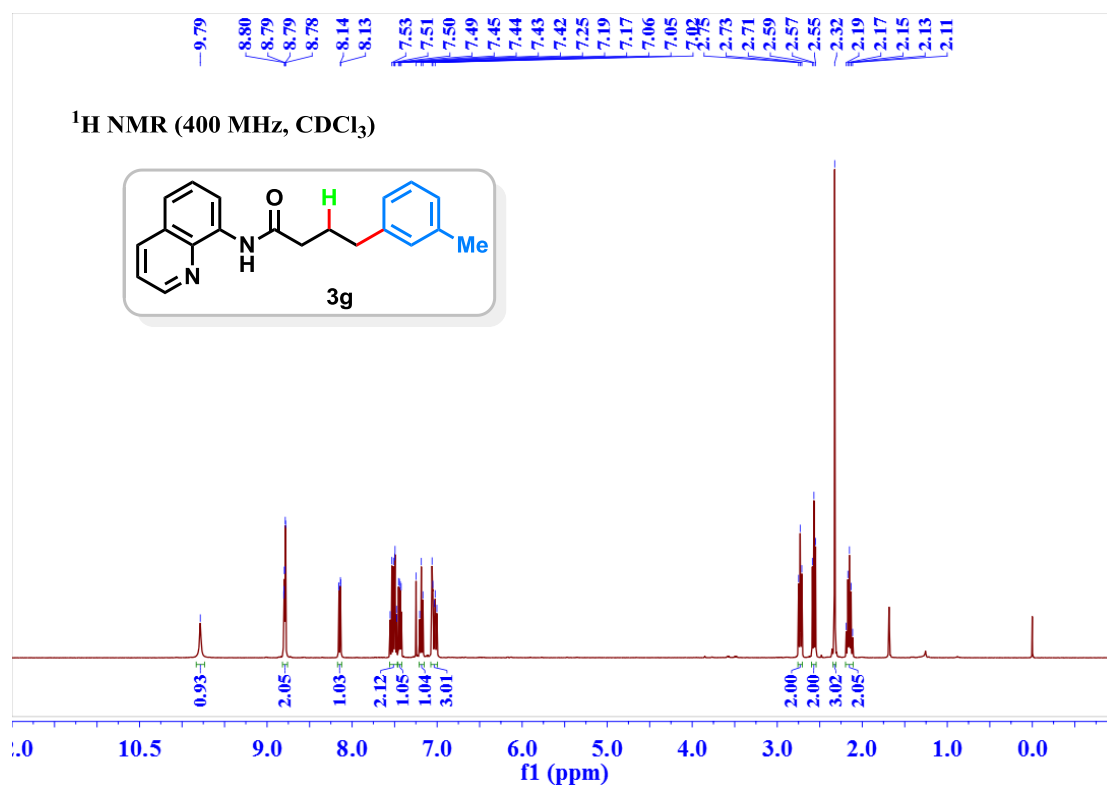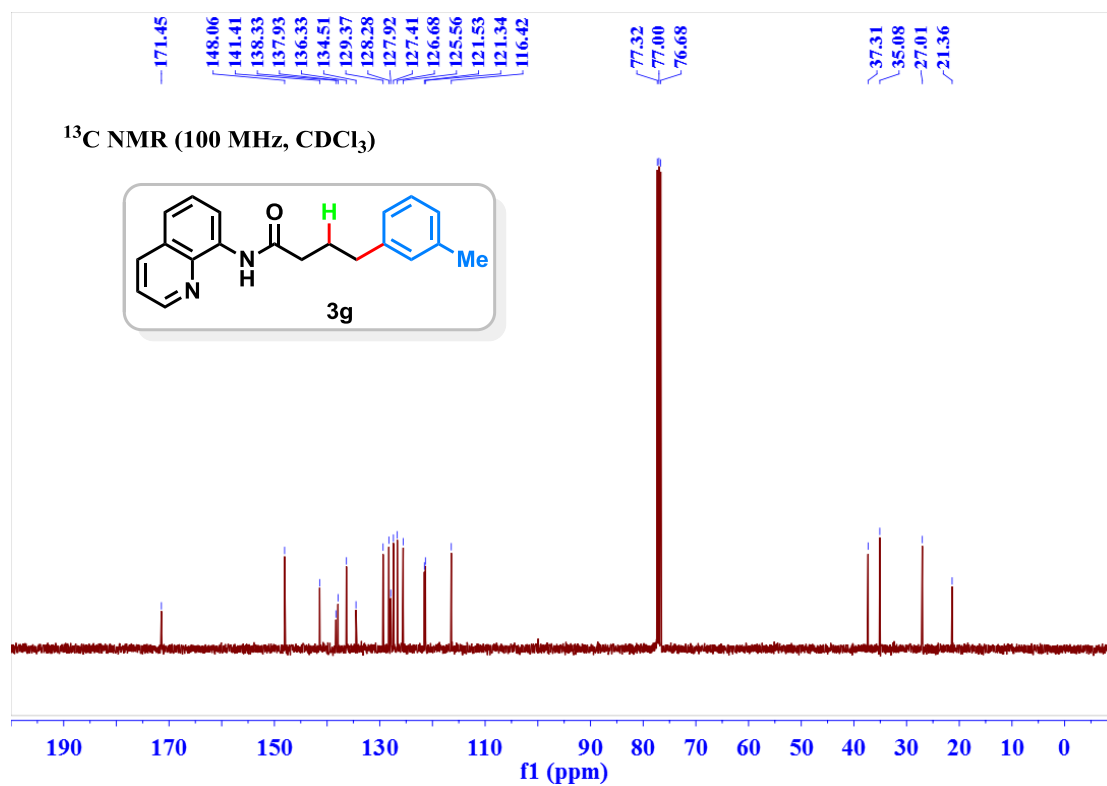

# 4-(3-methoxyphenyl)-*N*-(quinolin-8-yl)butanamide (3h)

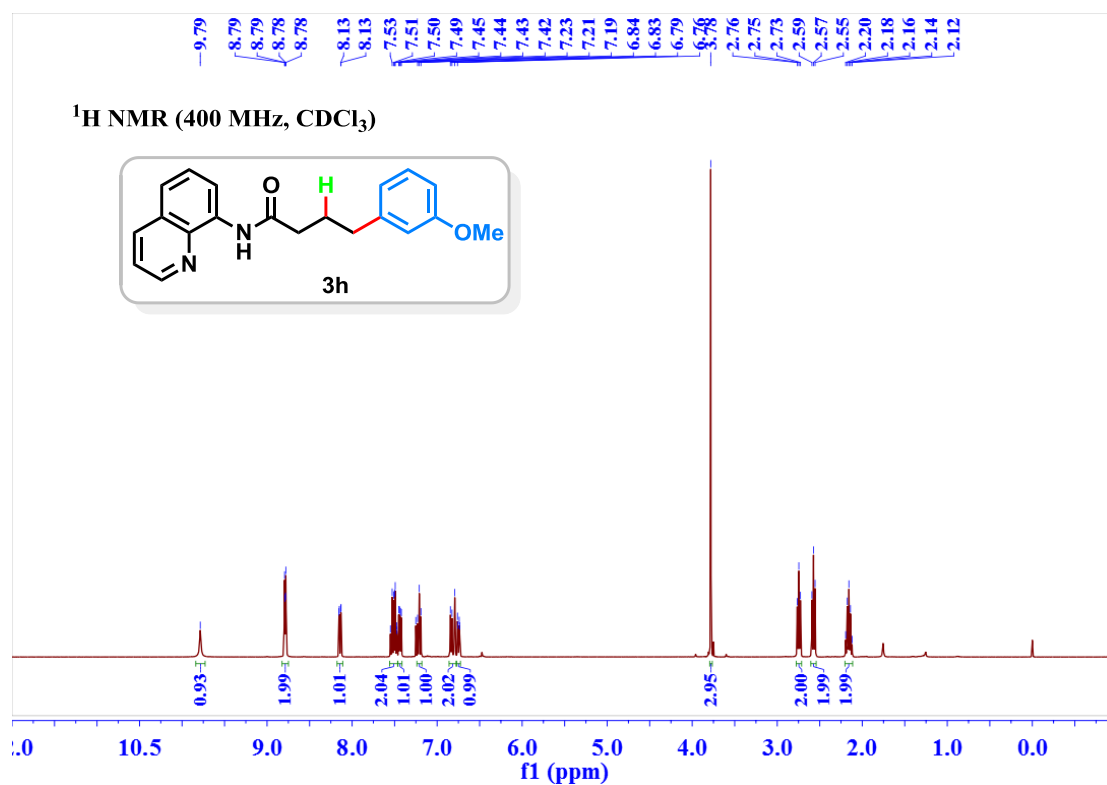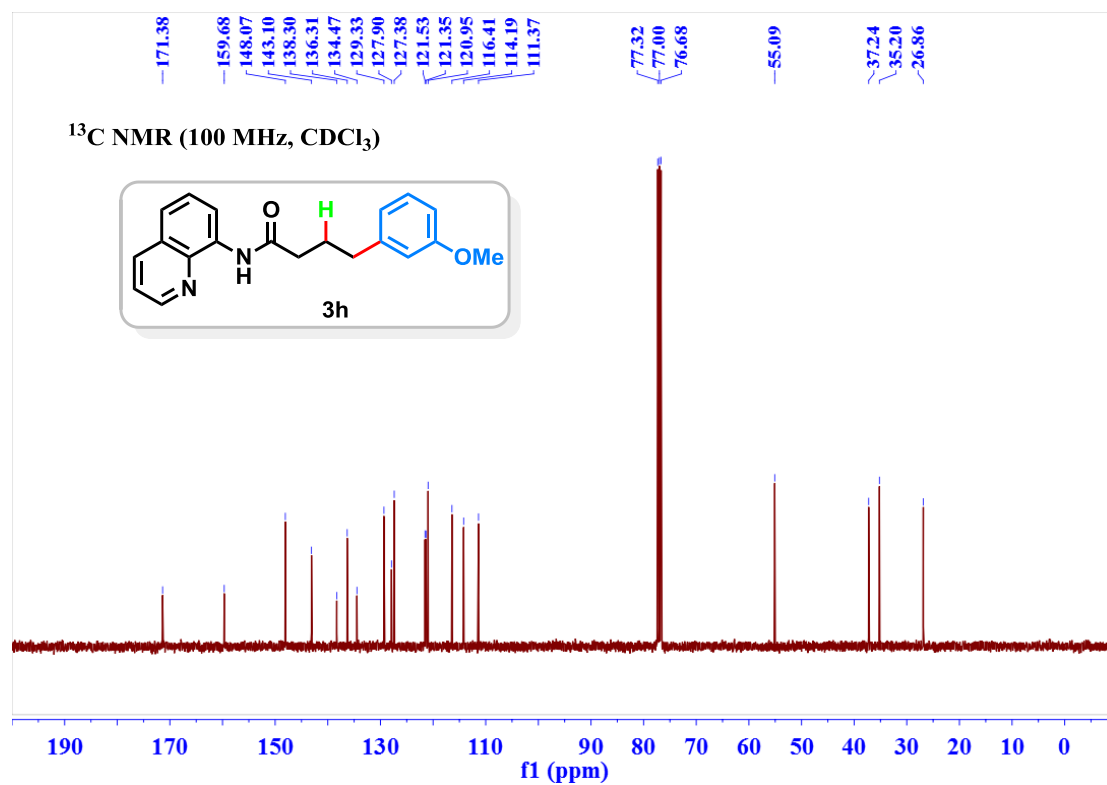

***N*-(quinolin-8-yl)-4-(3-(trifluoromethyl)phenyl)butanamide (3i)**

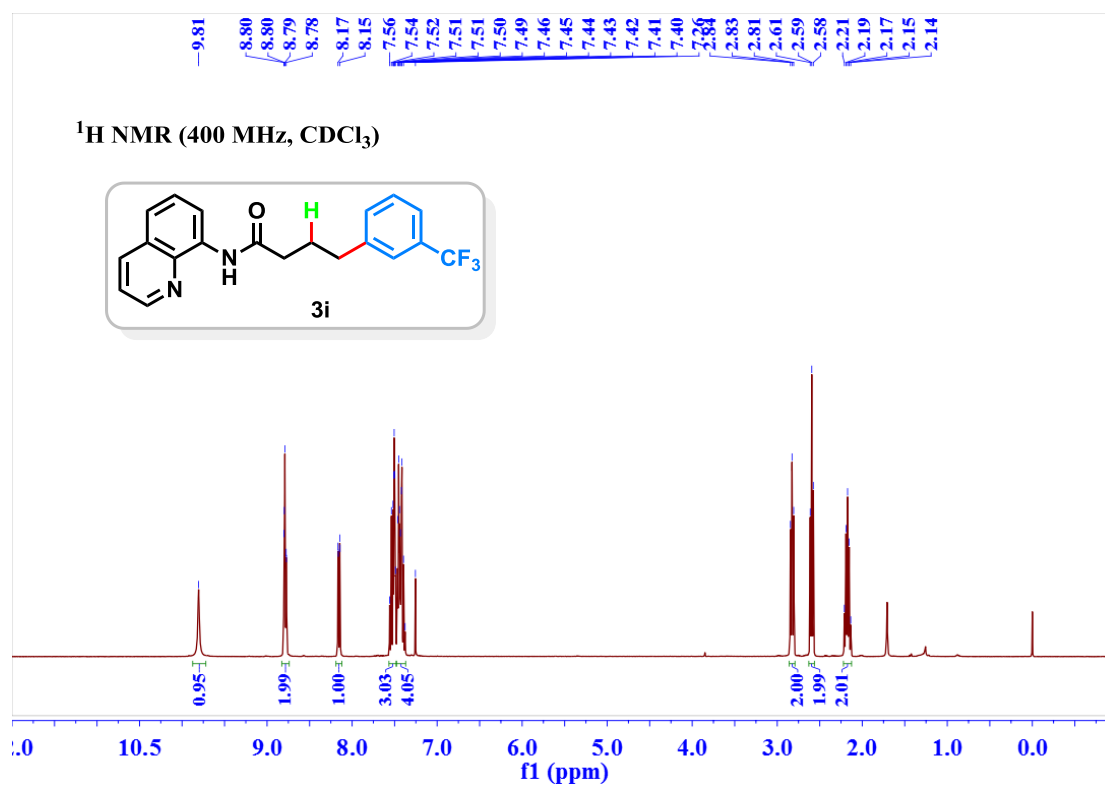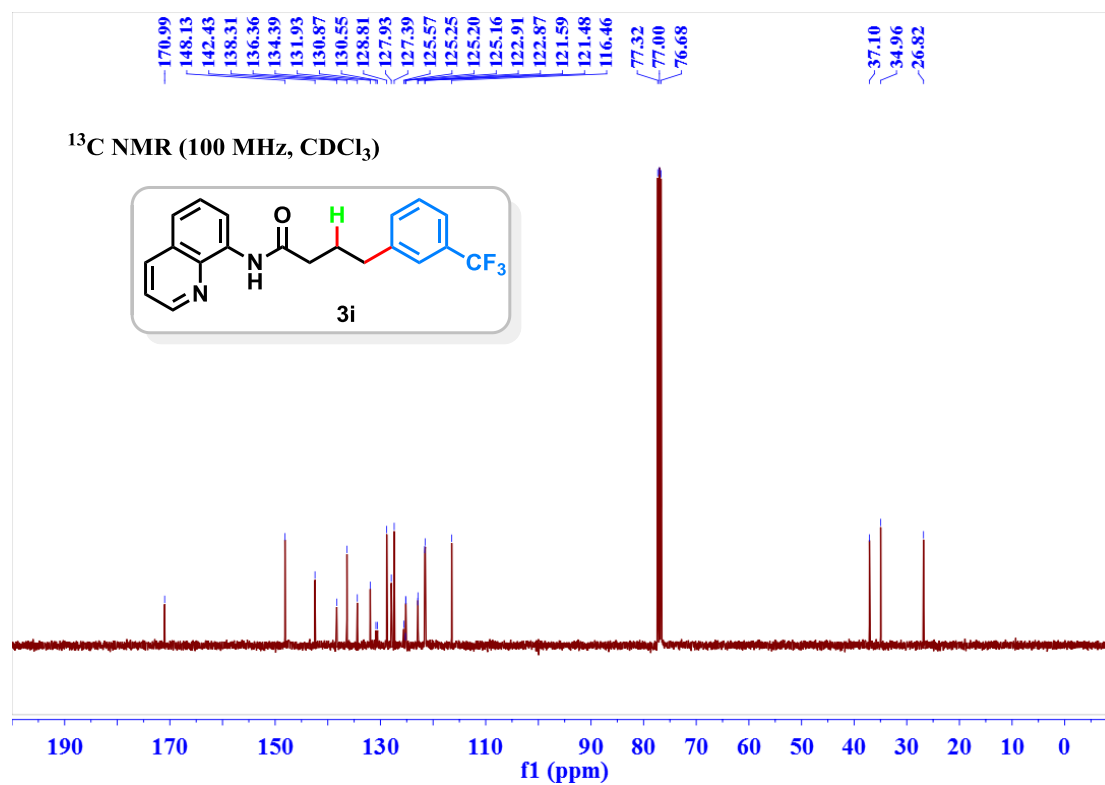

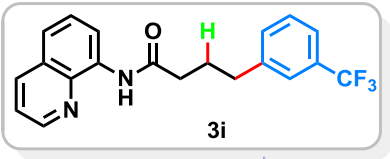

**4-(4-fluorophenyl)-*N*-(quinolin-8-yl)butanamide (3j)**

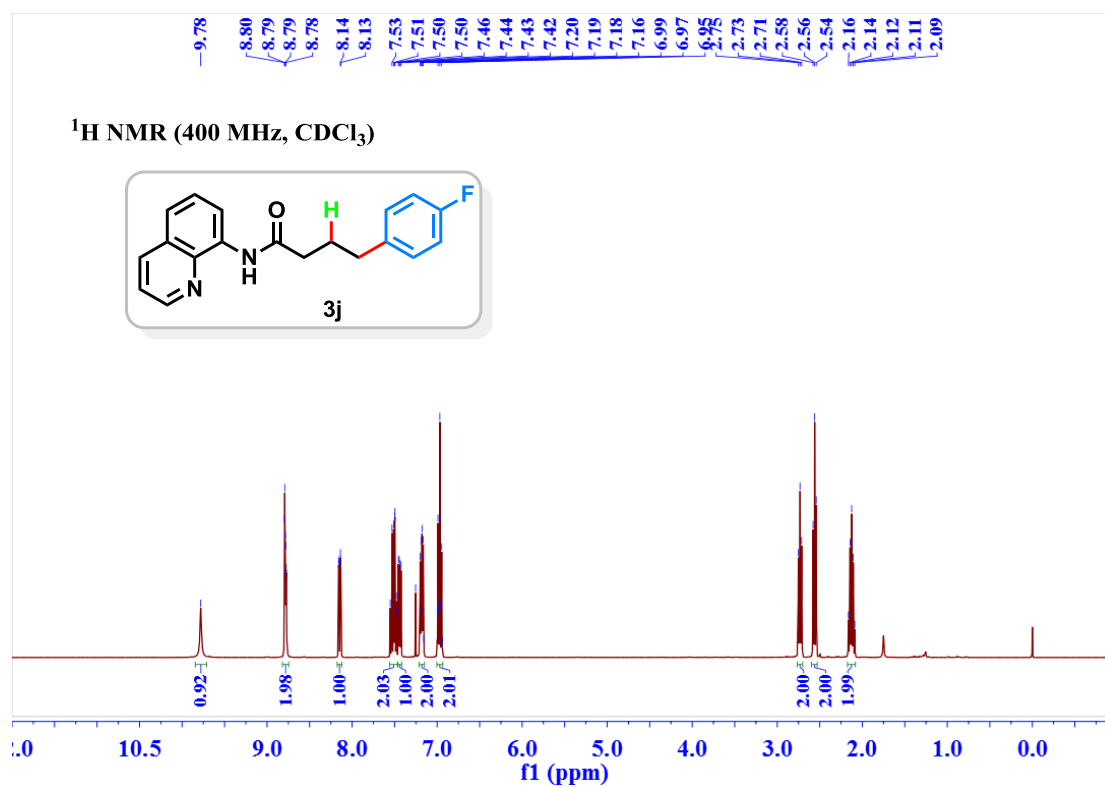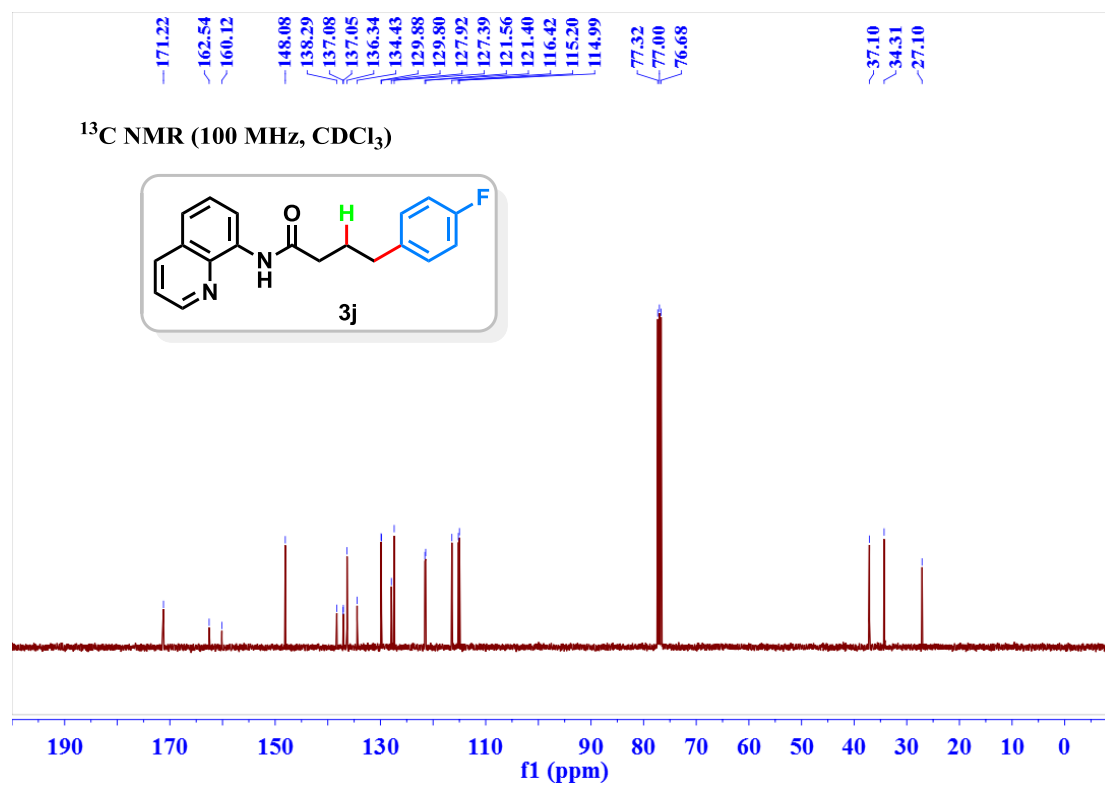



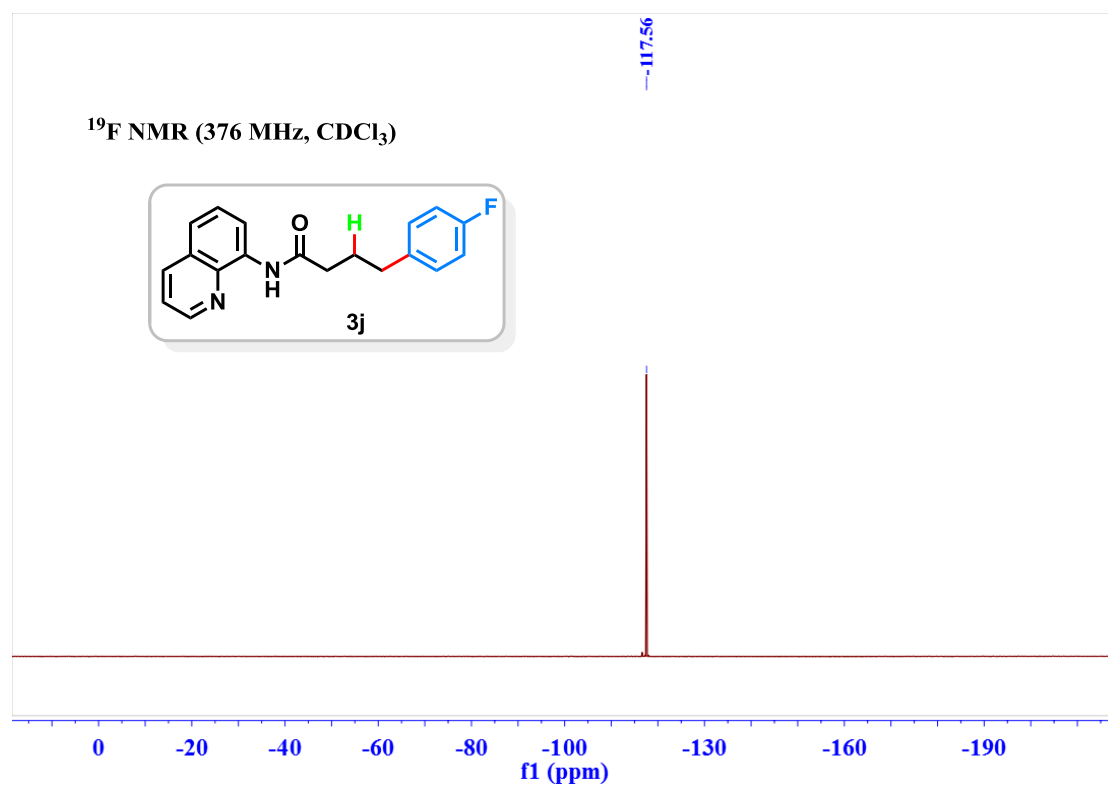

4-(4-chlorophenyl)-*N*-(quinolin-8-yl)butanamide (3k)

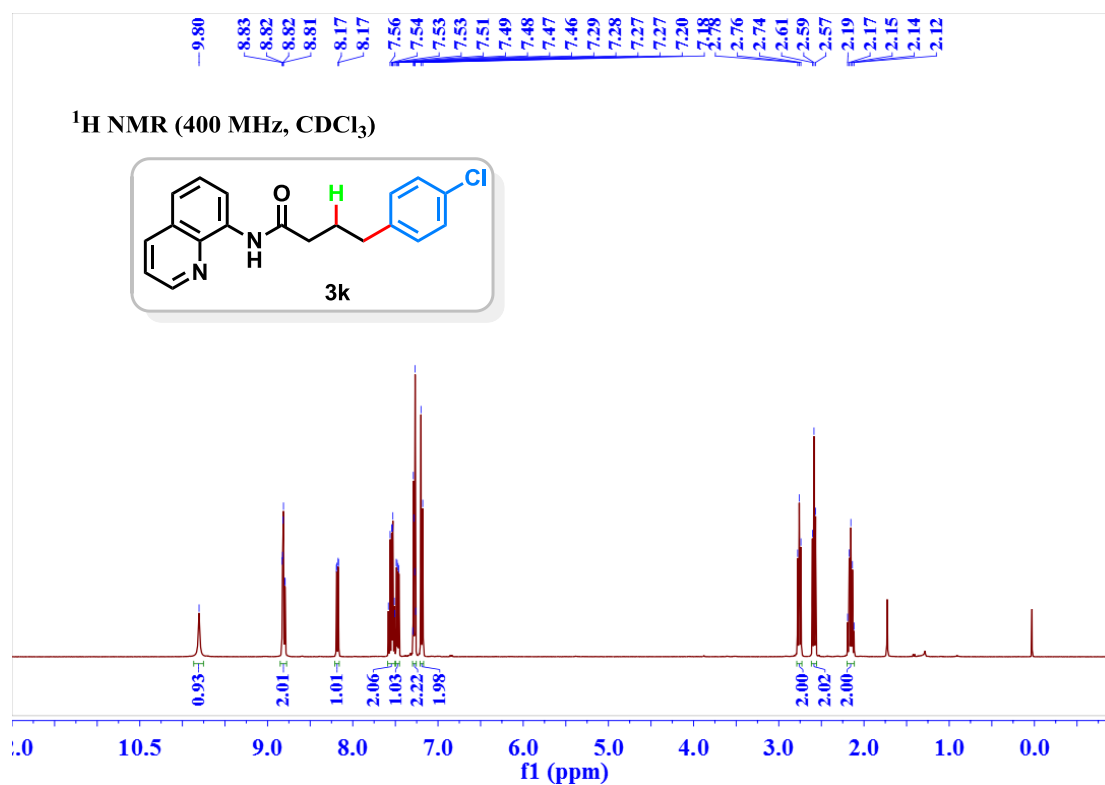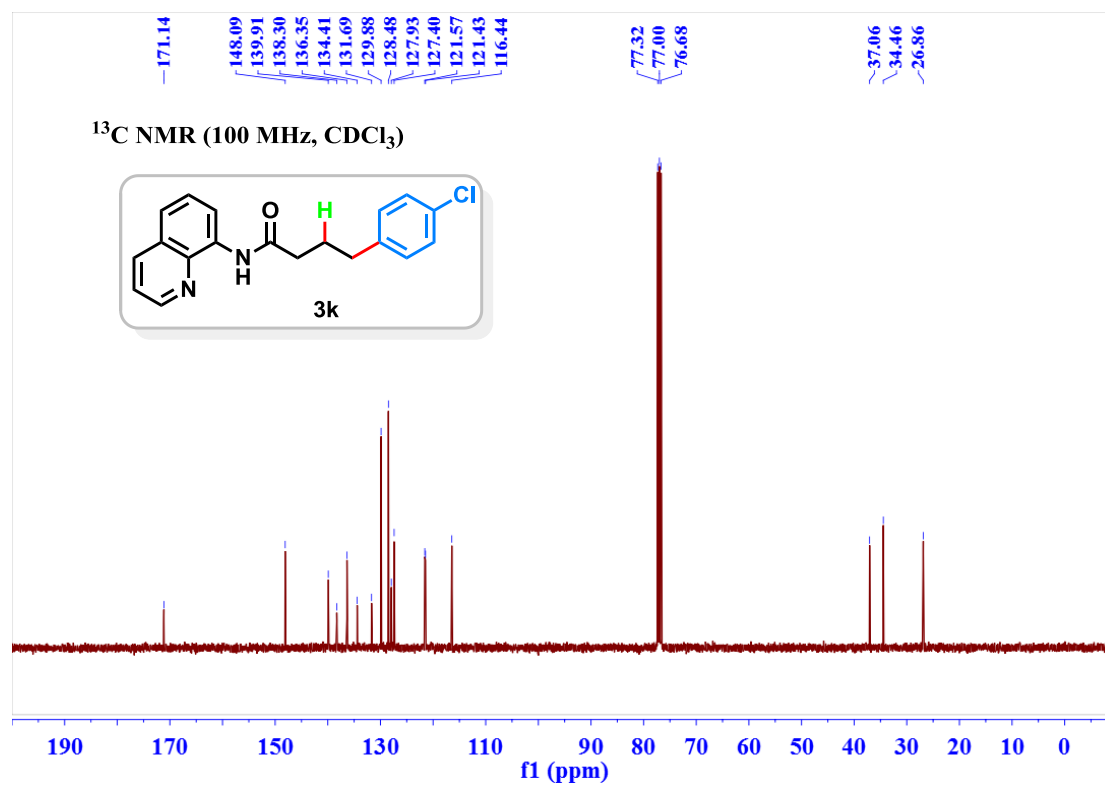

***N*-(quinolin-8-yl)-4-(*p*-tolyl)butanamide (3l)**

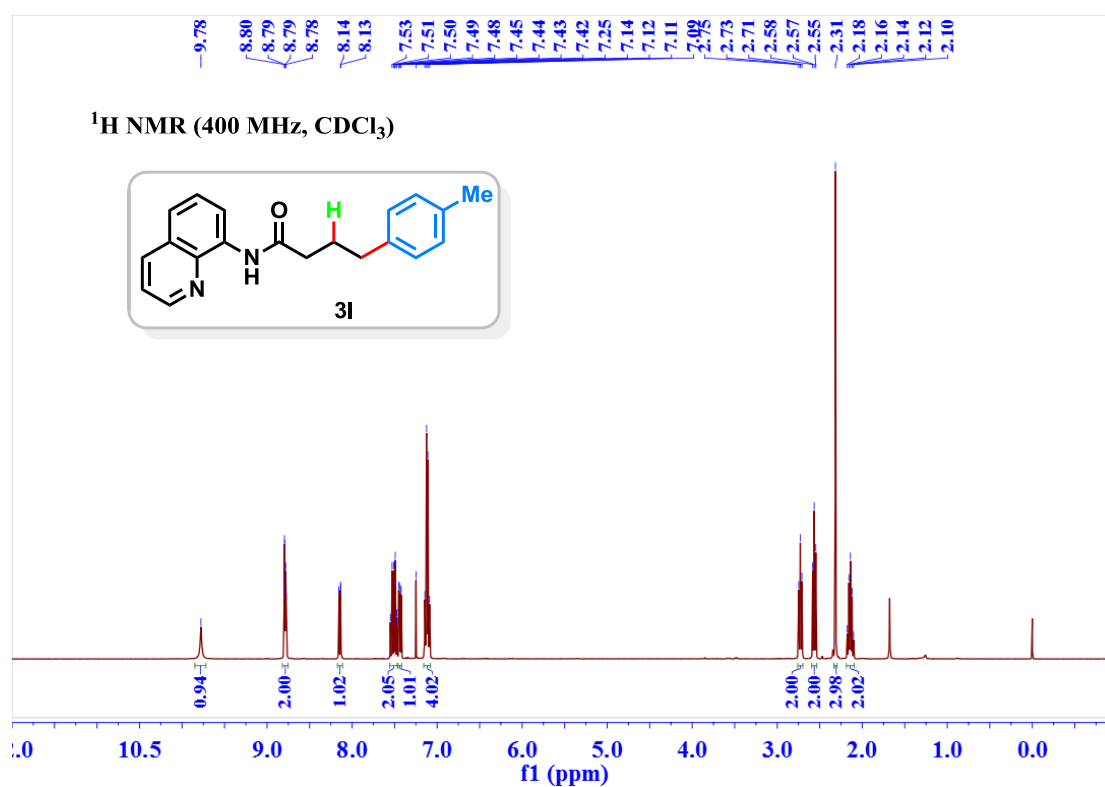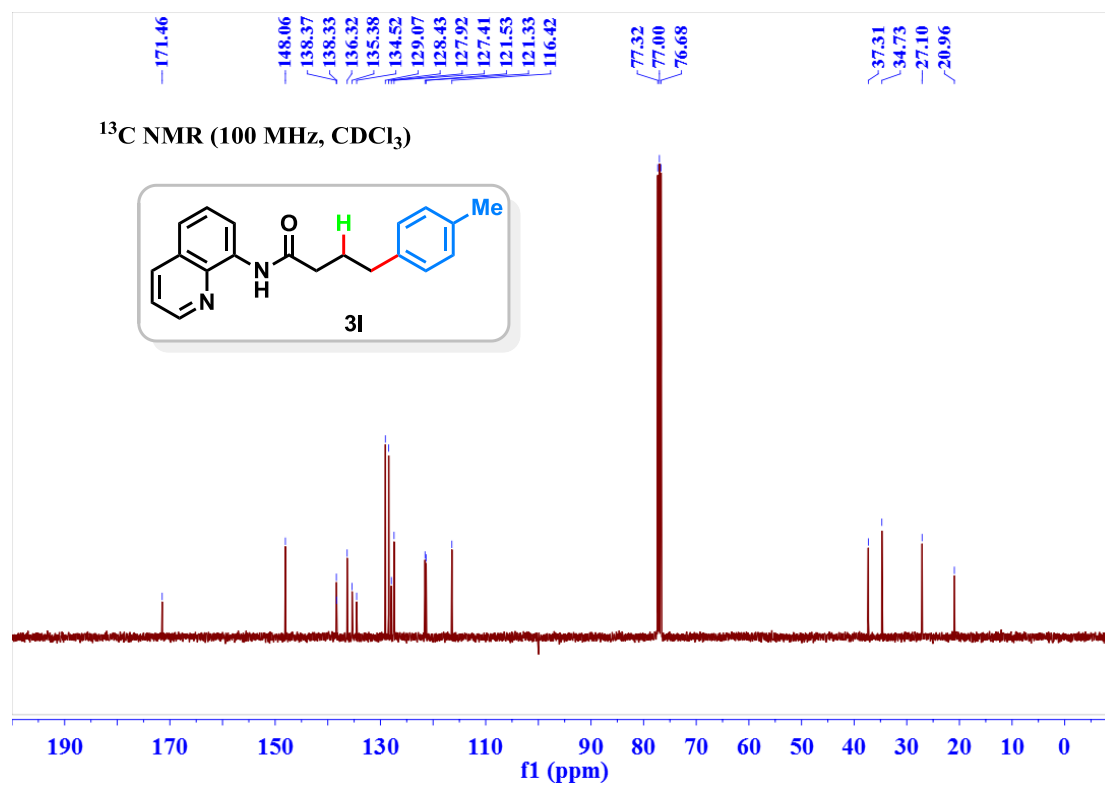

**4-(4-isopropylphenyl)-N-(quinolin-8-yl)butanamide (3m)**

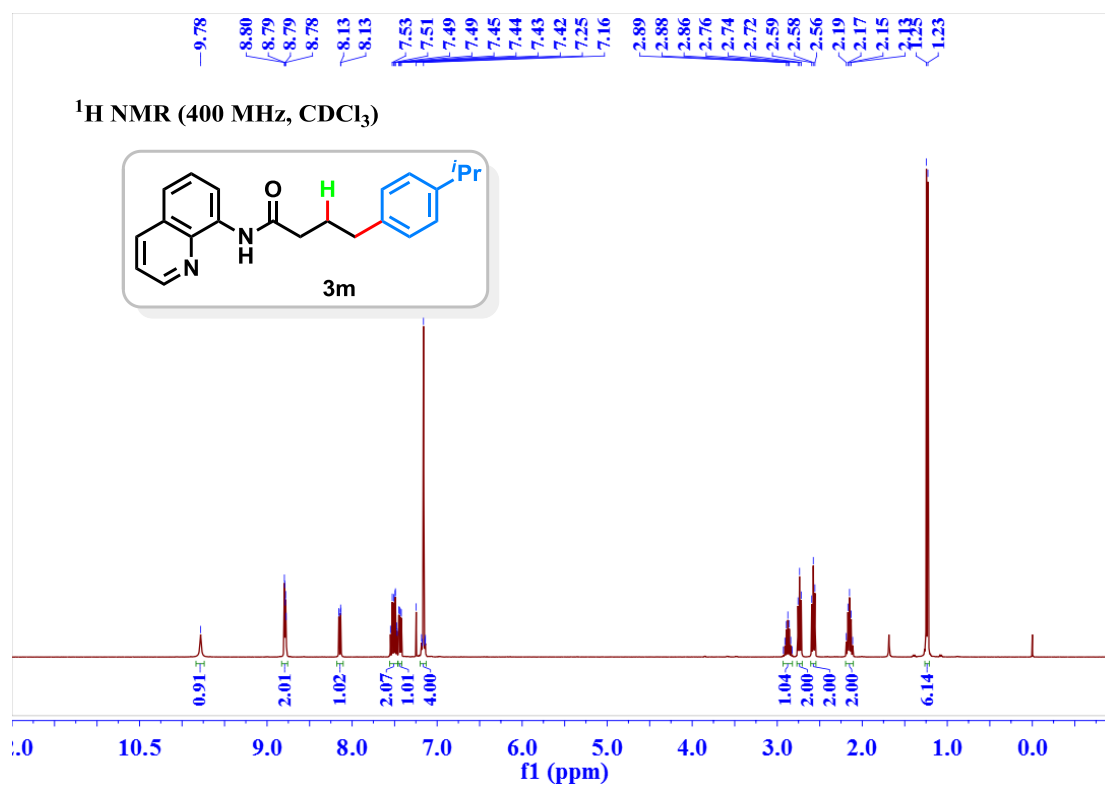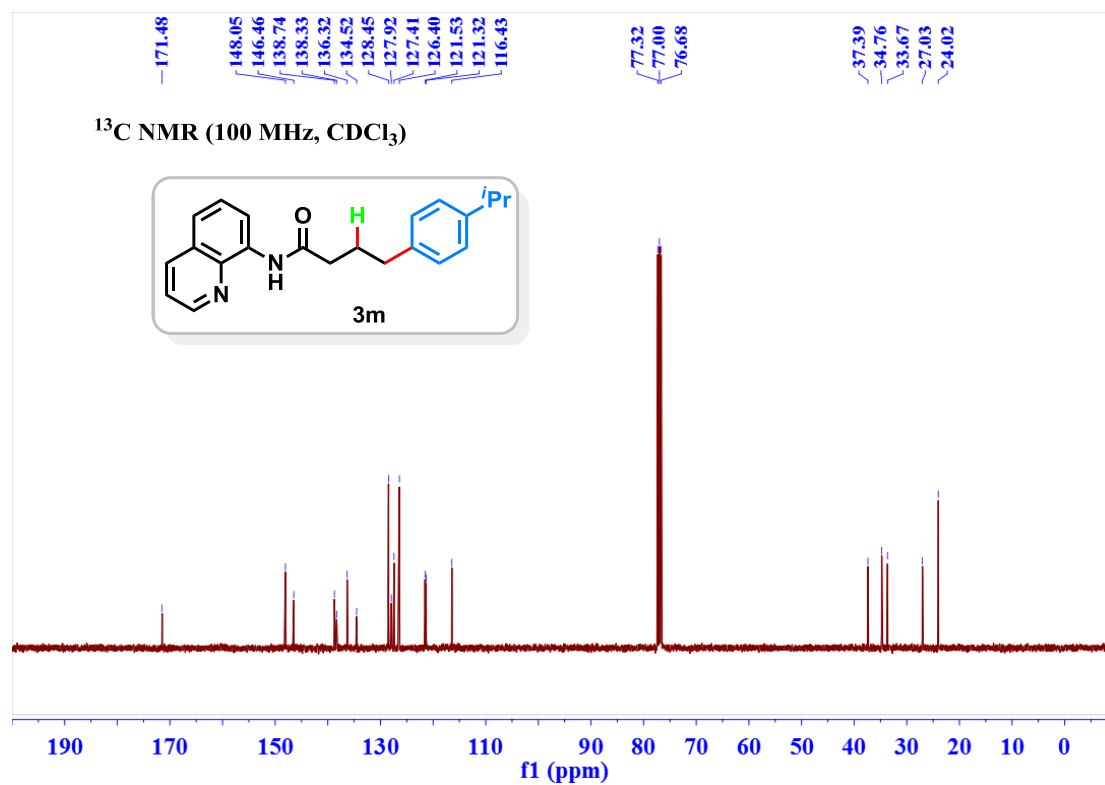

**4-(4-butylphenyl)-*N*-(quinolin-8-yl)butanamide (3n)**

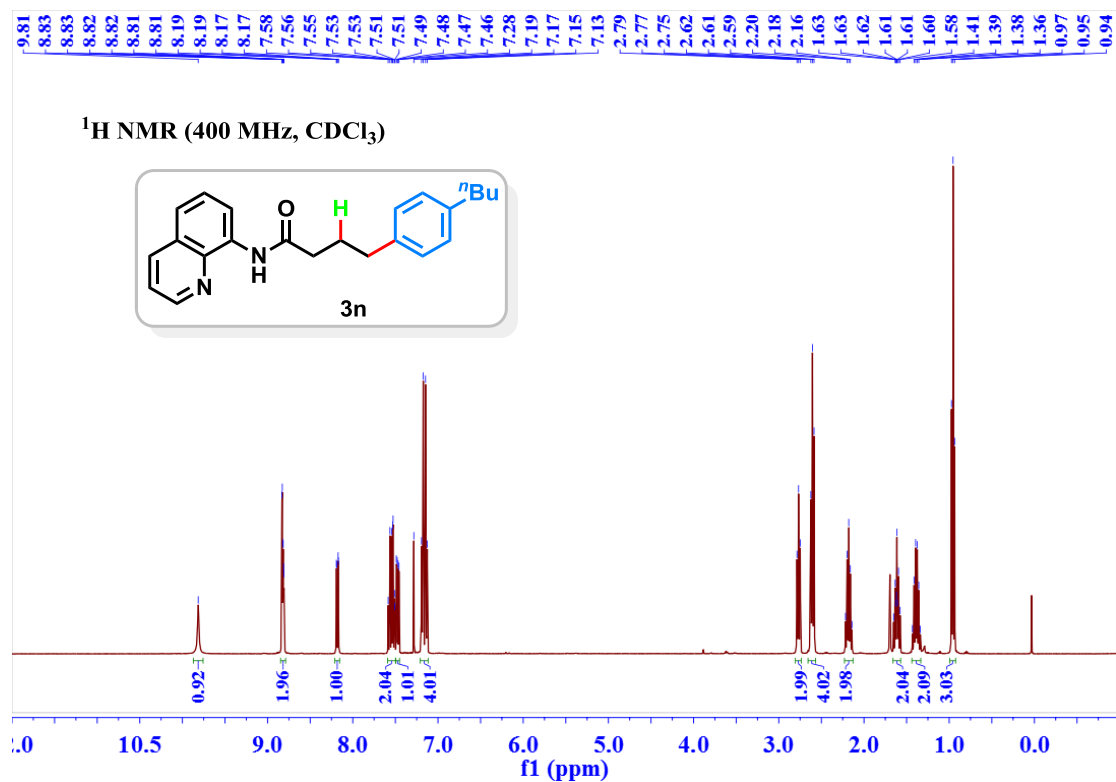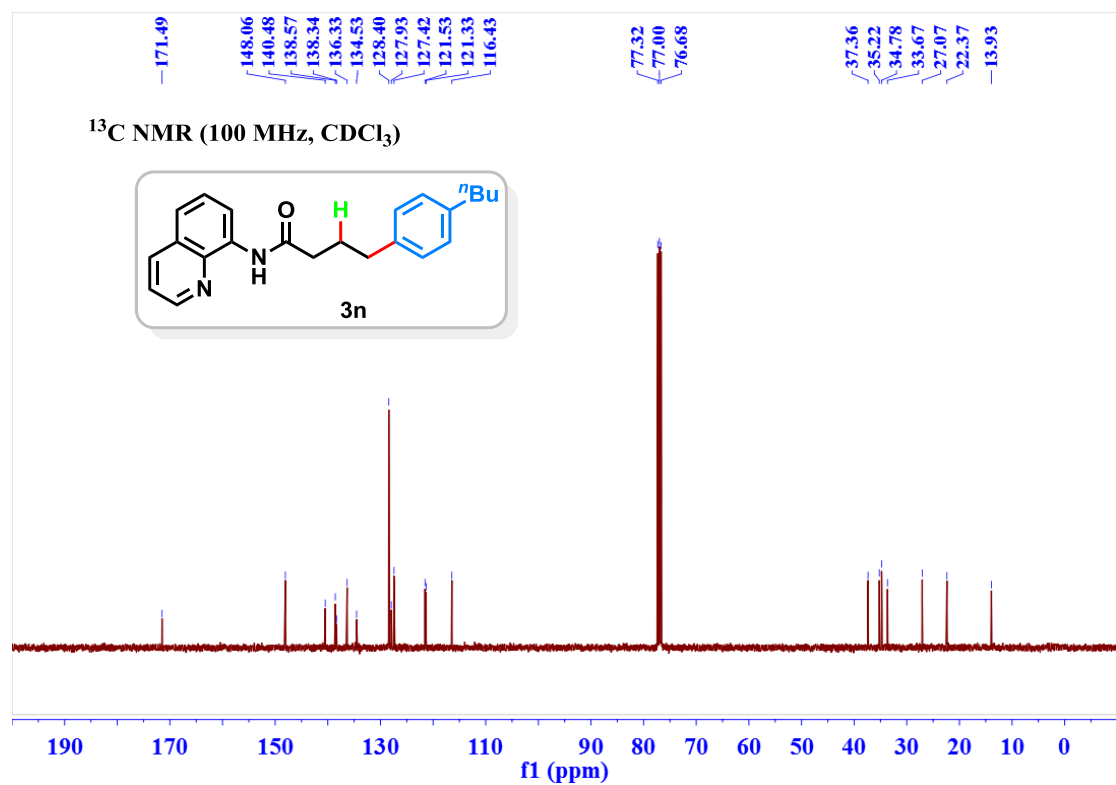

**4-(4-(*tert*-butyl)phenyl)-*N*-(quinolin-8-yl)butanamide (3o)**

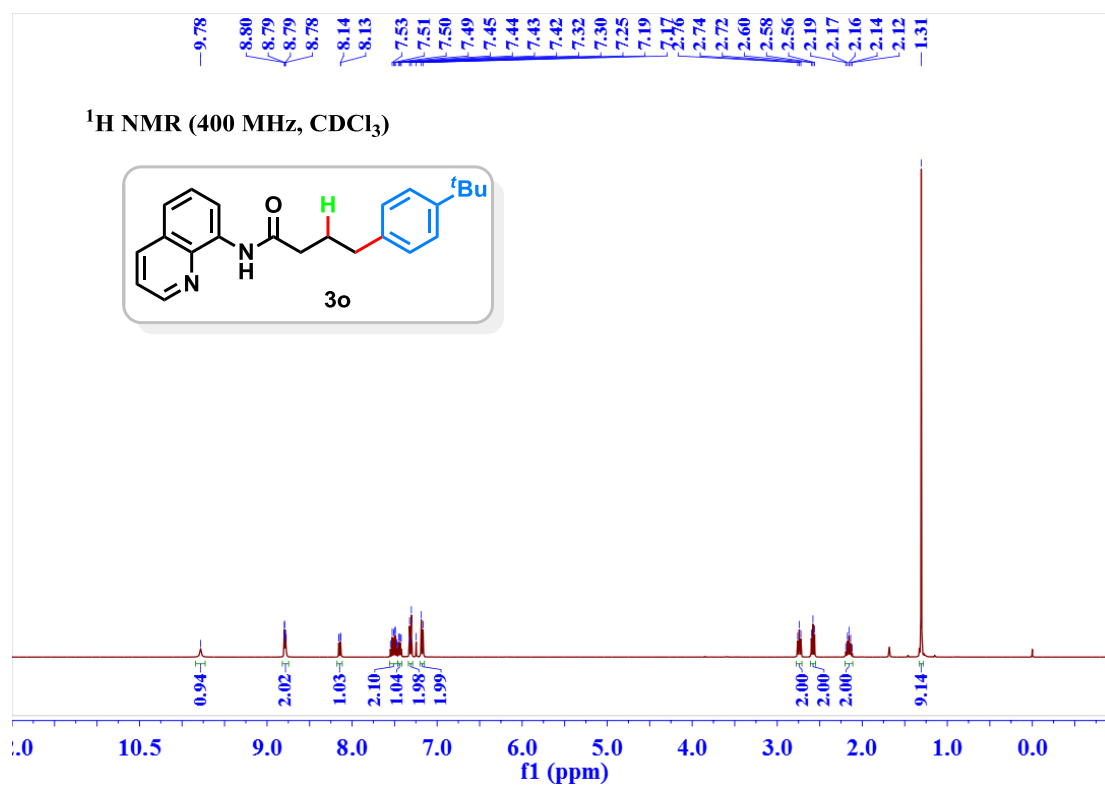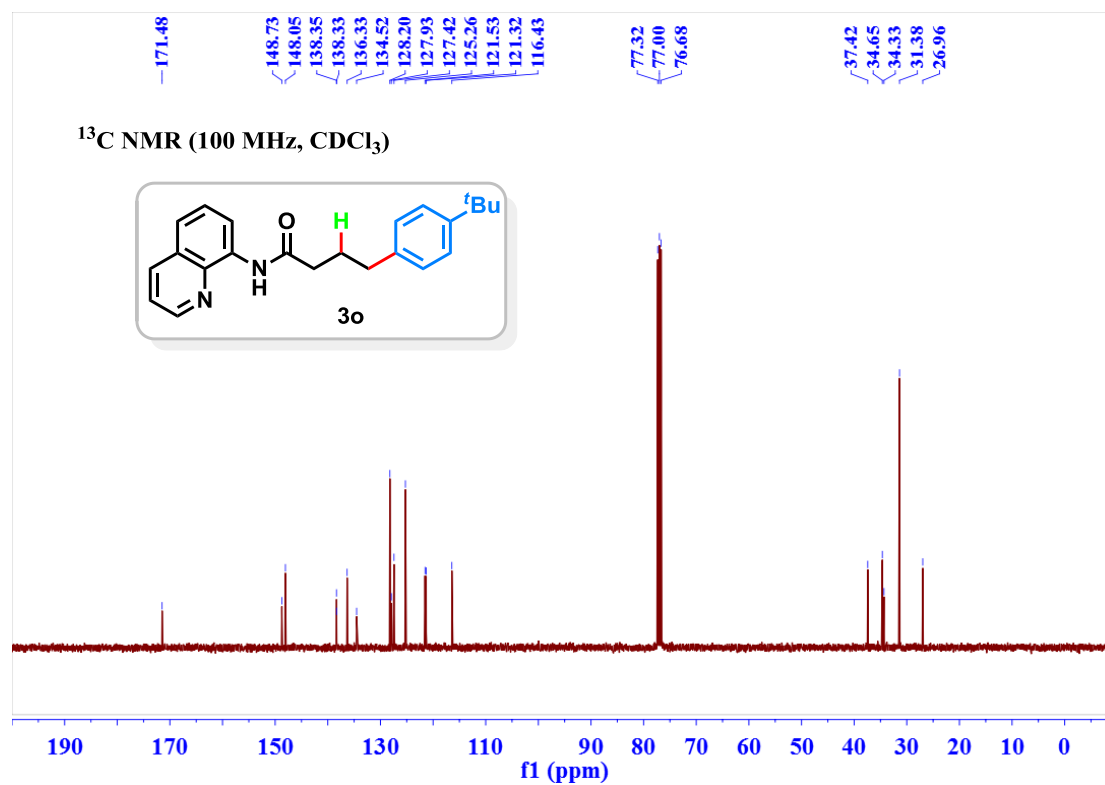

4-([1,1'-biphenyl]-4-yl)-*N*-(quinolin-8-yl)butanamide (3p)

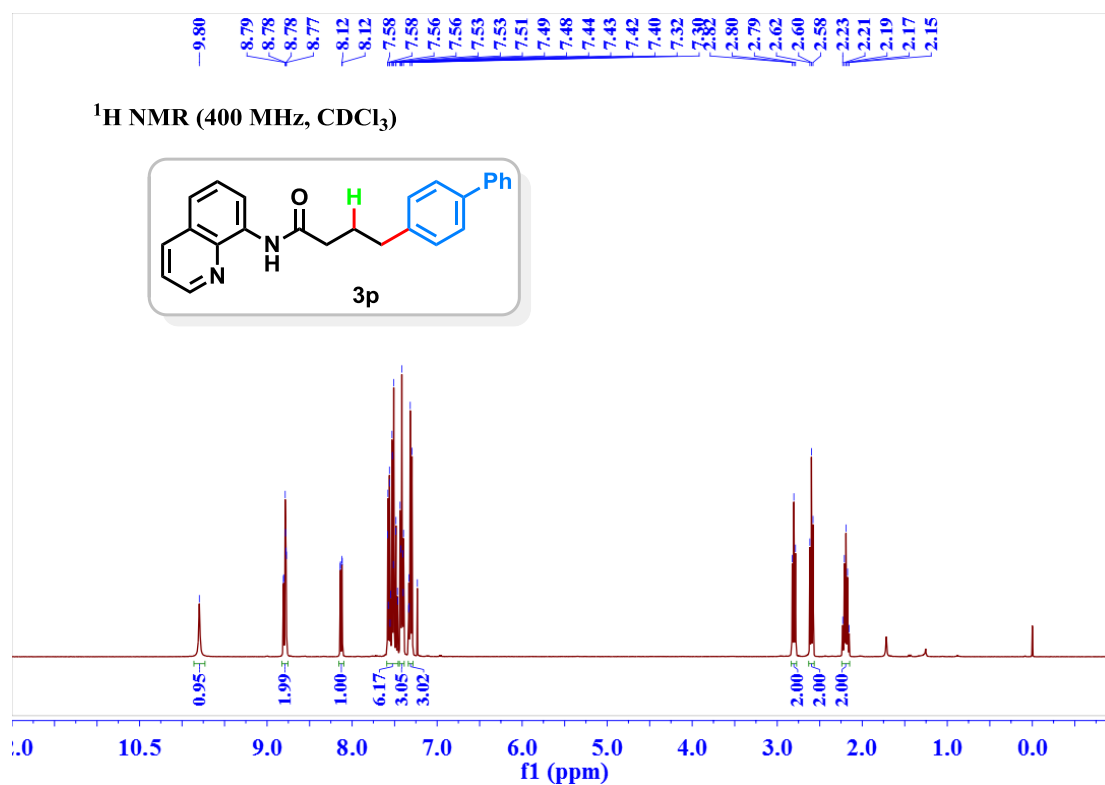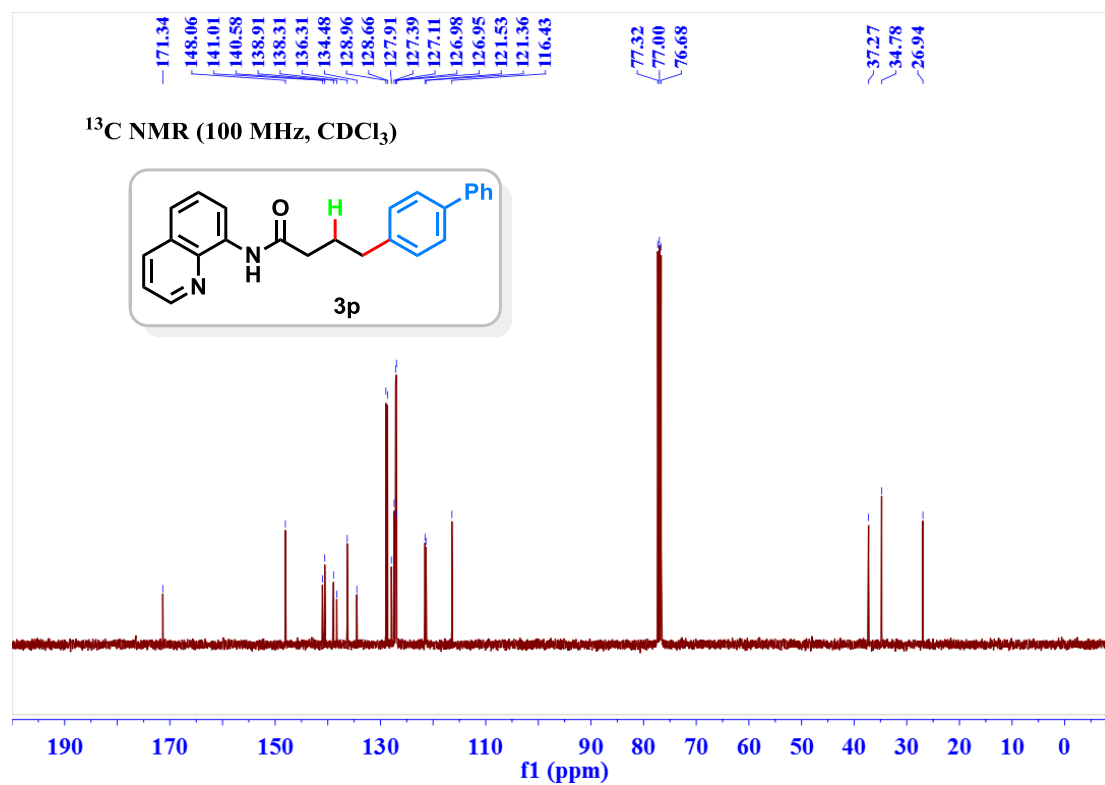

**4-(4-methoxyphenyl)-*N*-(quinolin-8-yl)butanamide (3q)**

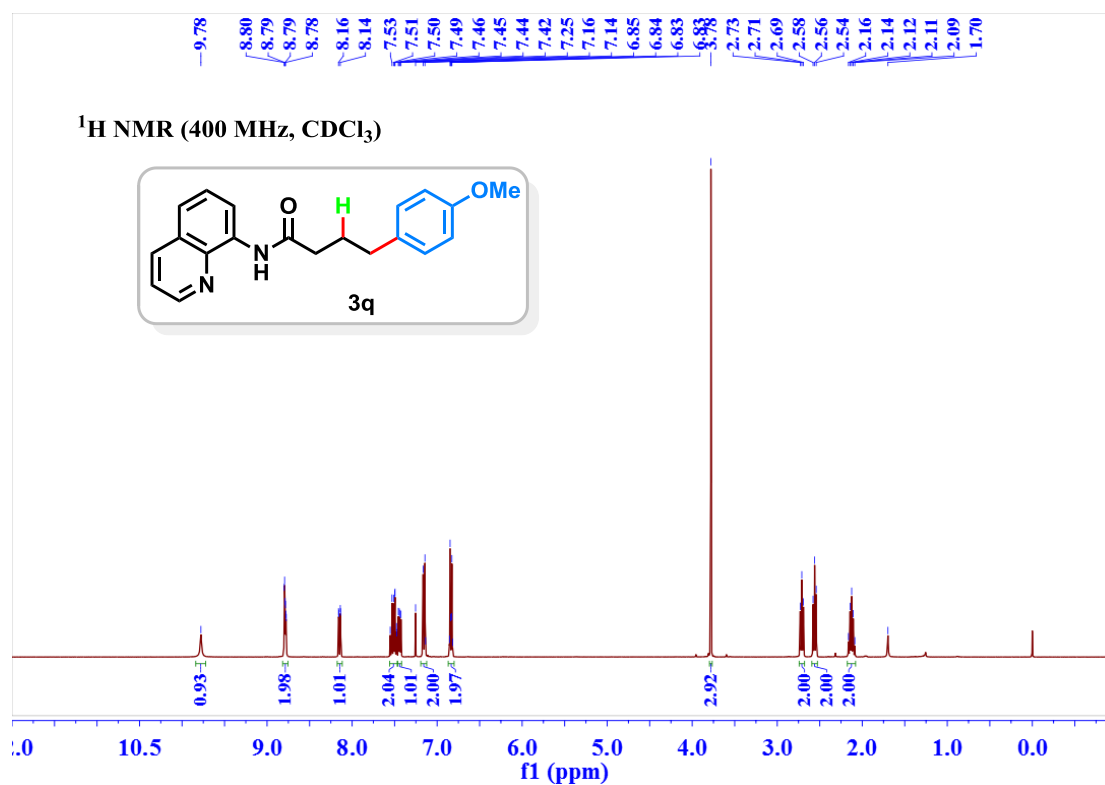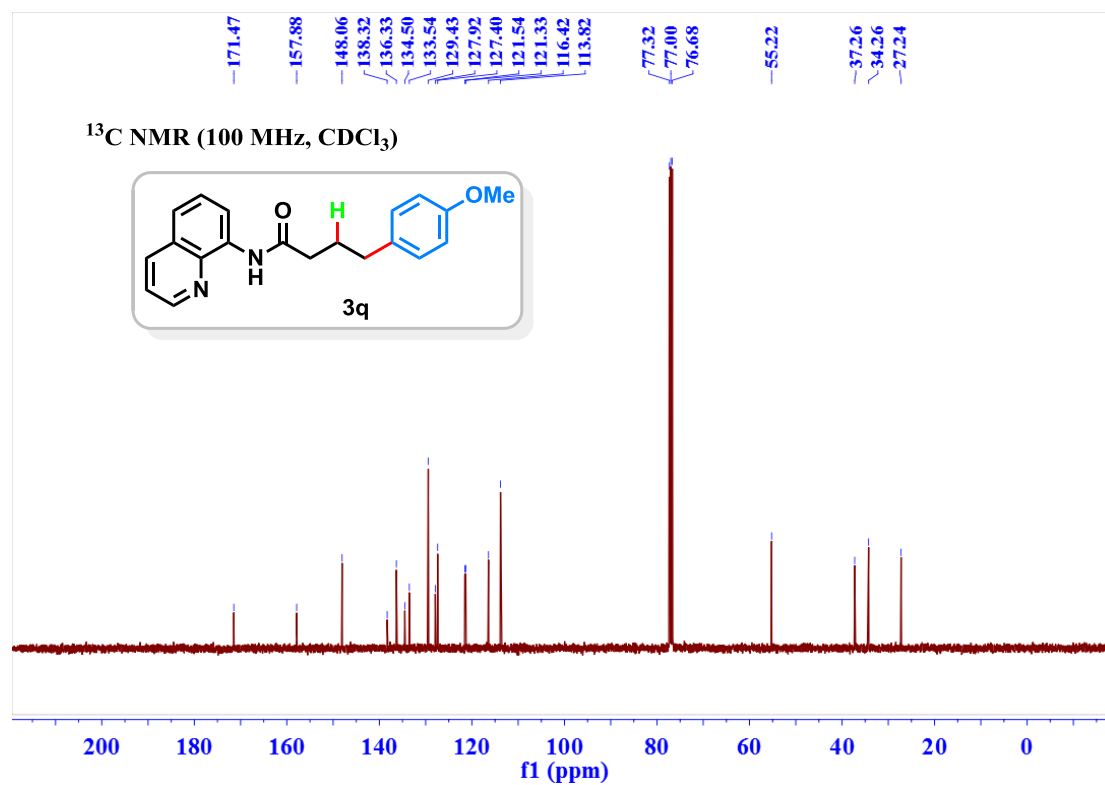



**4-(4-(methylthio)phenyl)-N-(quinolin-8-yl)butanamide (3r)**

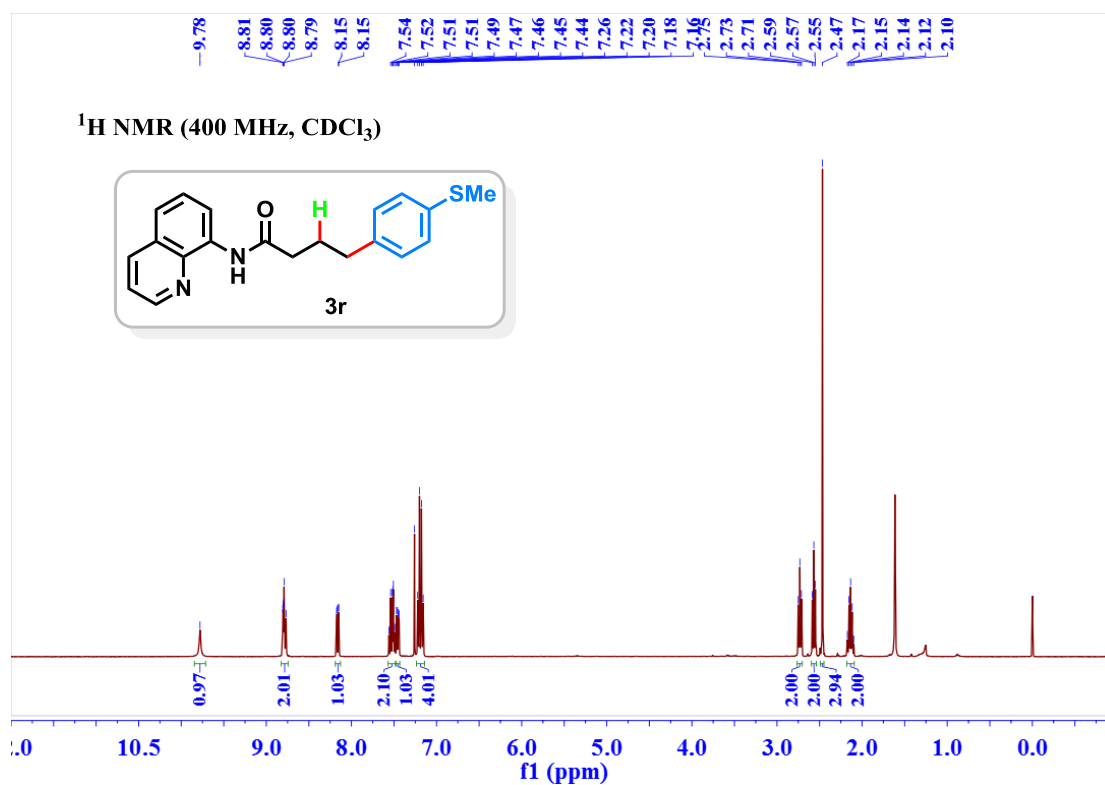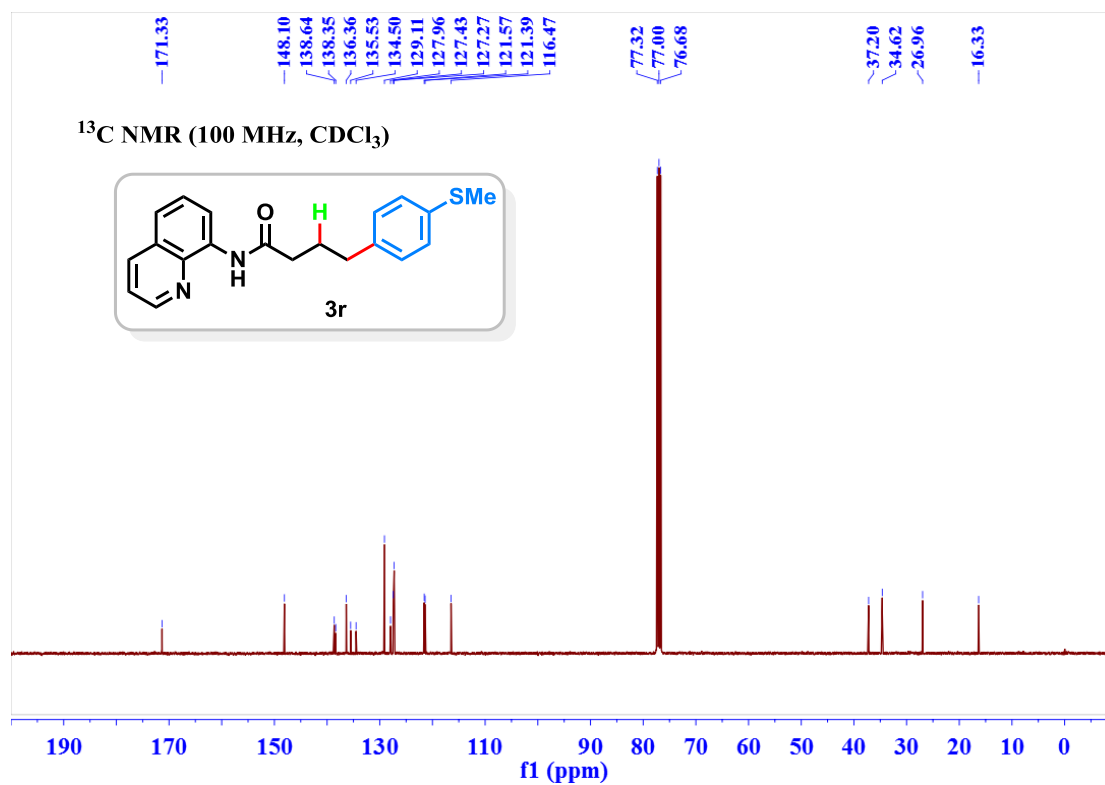

***N*-(quinolin-8-yl)-4-(4-(trifluoromethyl)phenyl)butanamide (3s)**

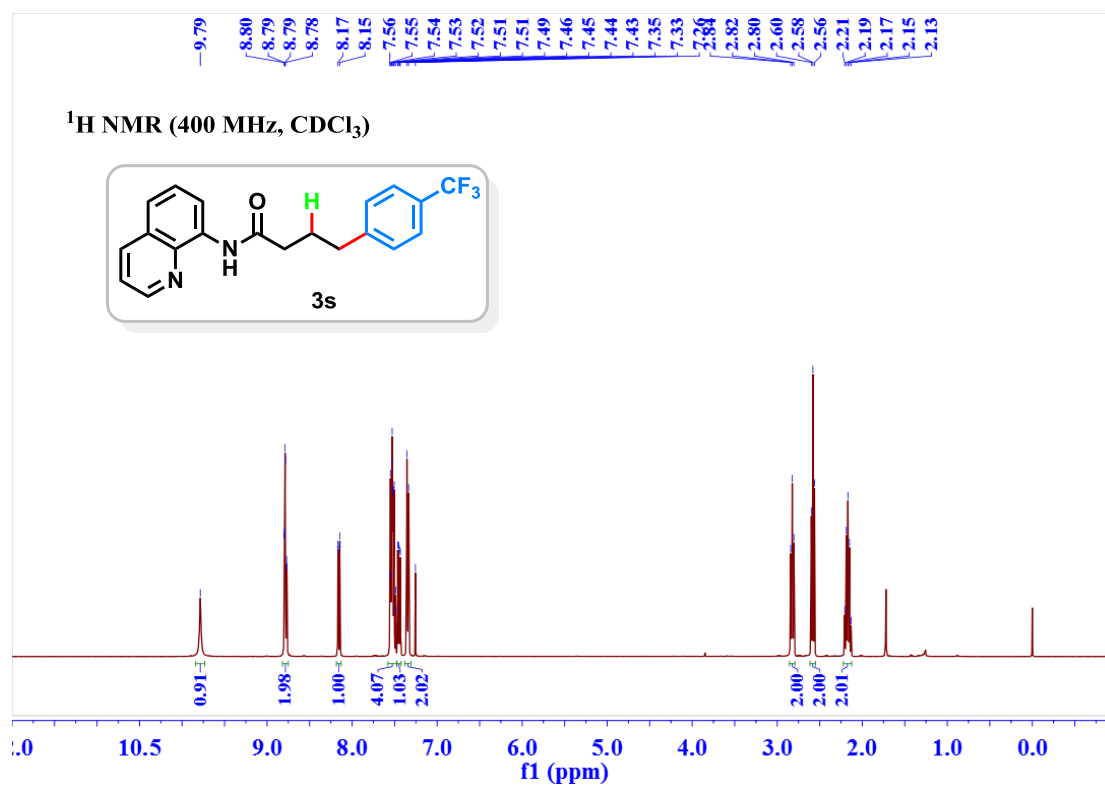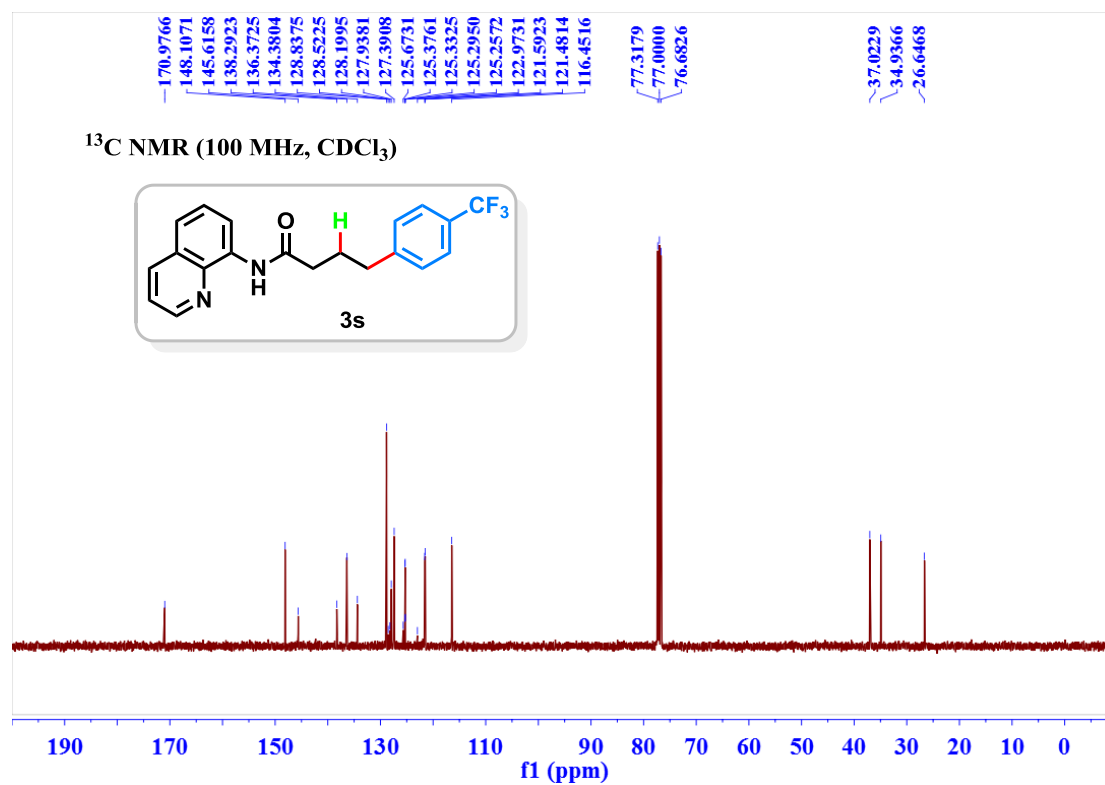

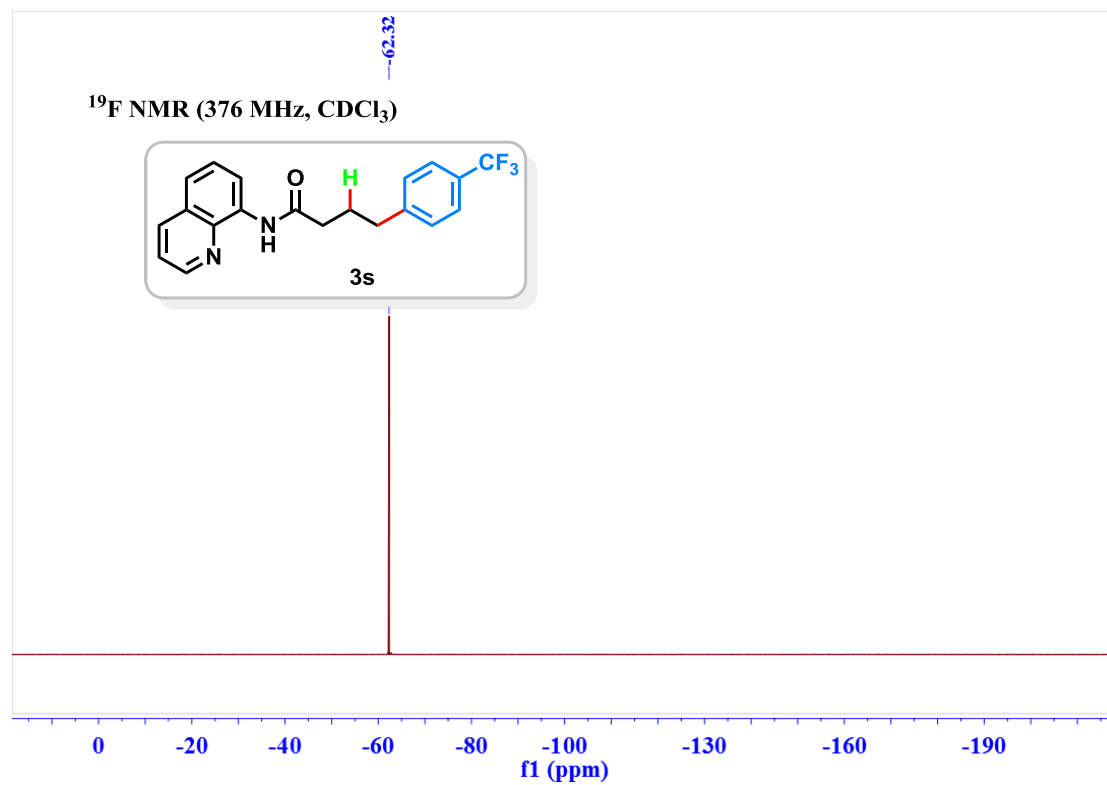

***N*-(quinolin-8-yl)-4-(4-(trifluoromethoxy)phenyl)butanamide (3t)**

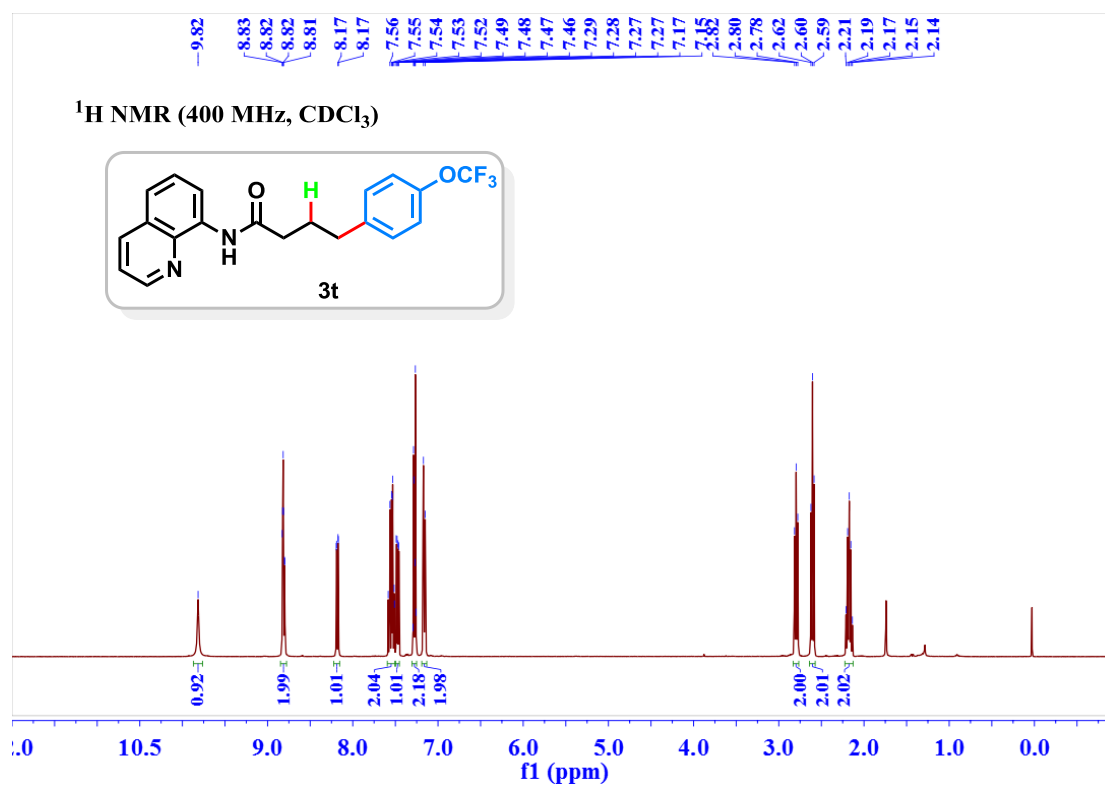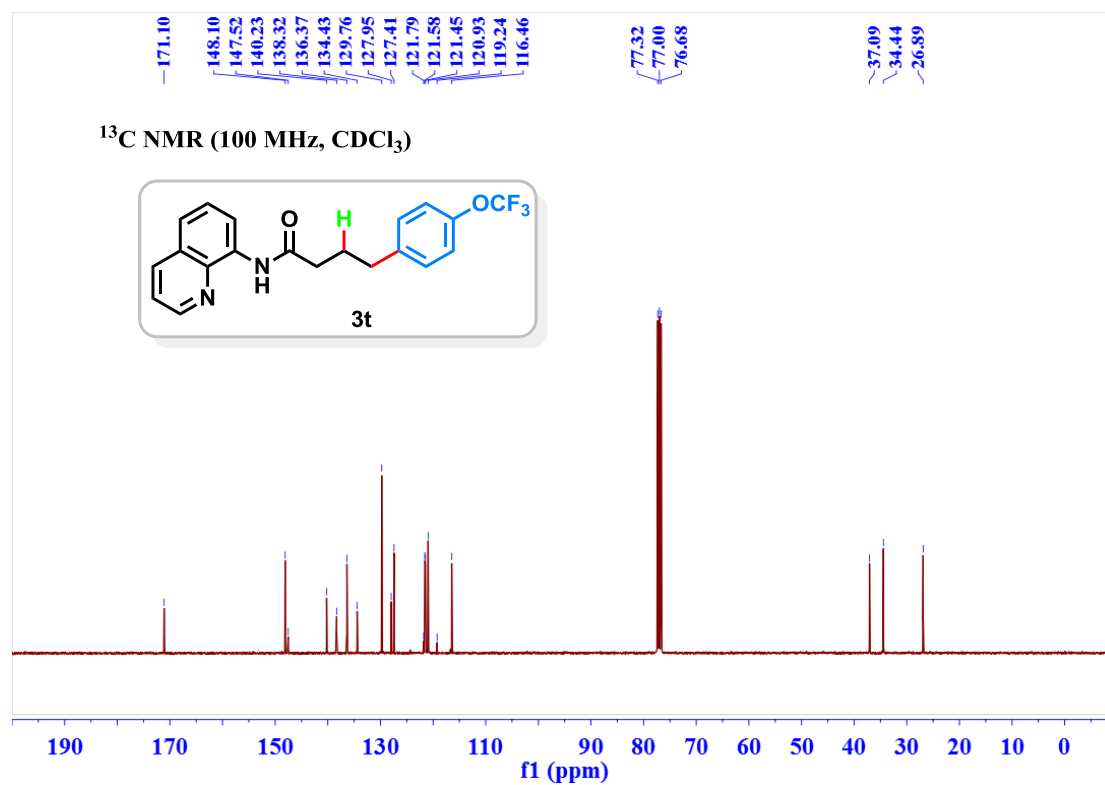

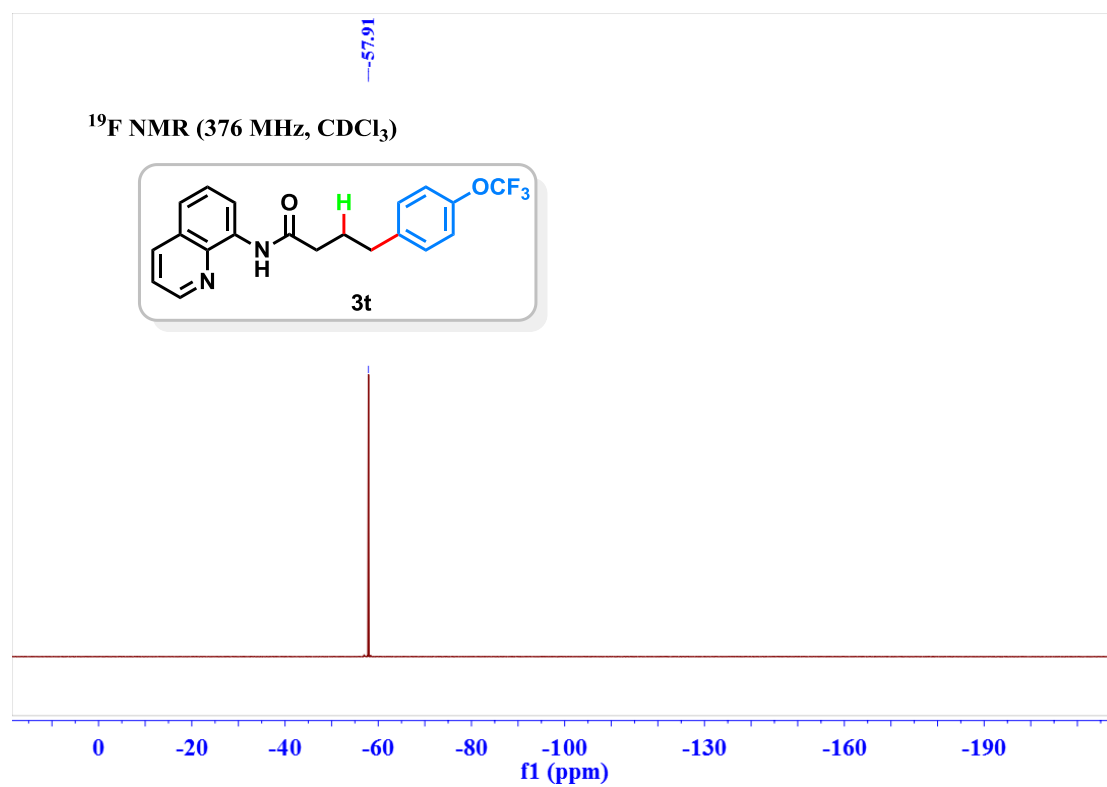

***N*-(quinolin-8-yl)-4-(4-vinylphenyl)butanamide (3u)**

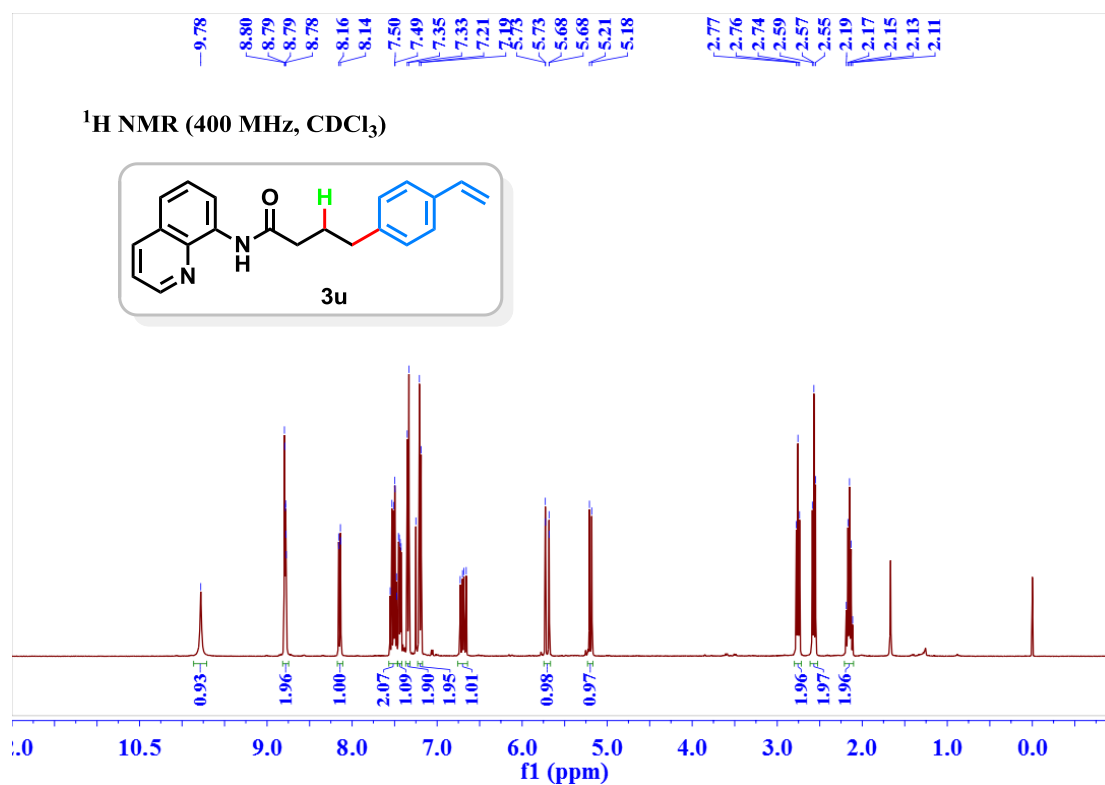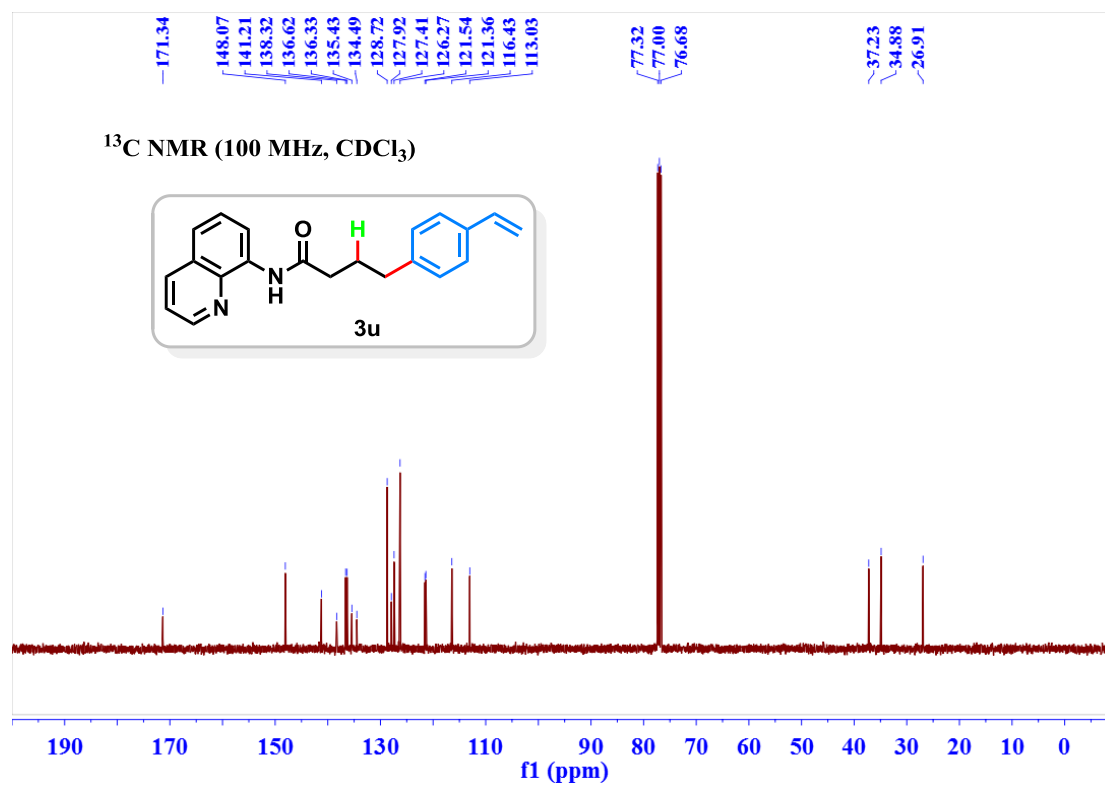

**4-(naphthalen-1-yl)-*N*-(quinolin-8-yl)butanamide (3v)**

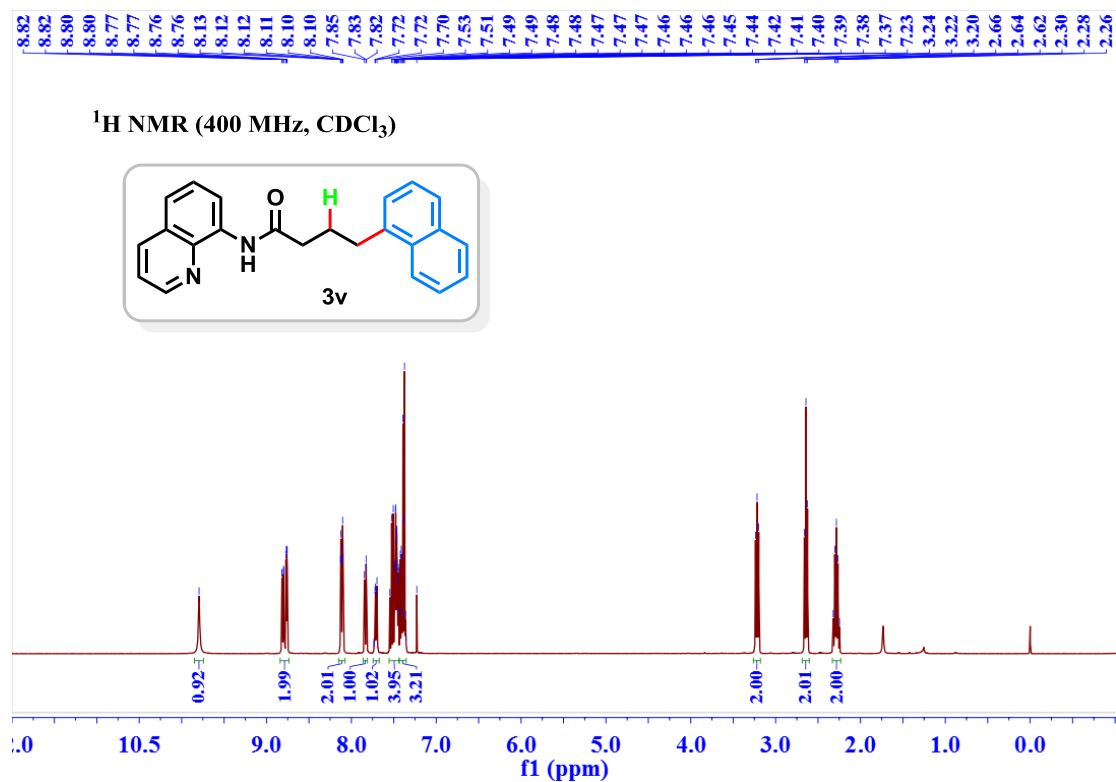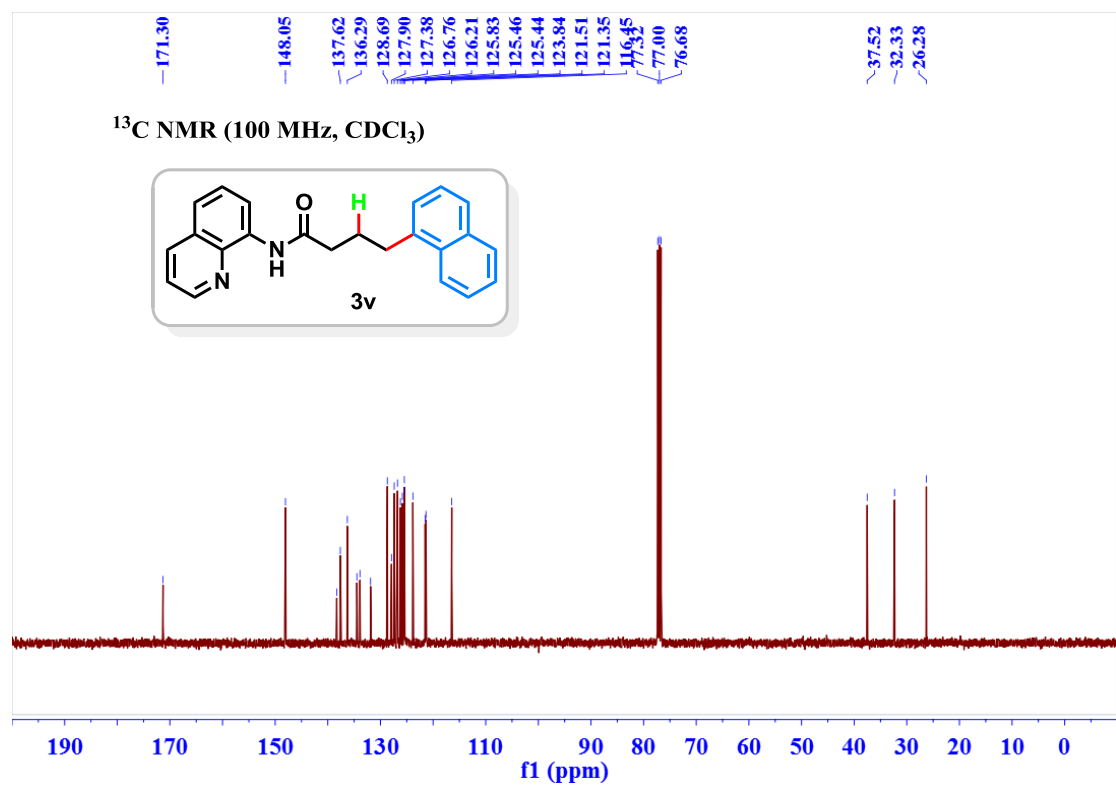

**4-(naphthalen-2-yl)-*N*-(quinolin-8-yl)butanamide (3w)**

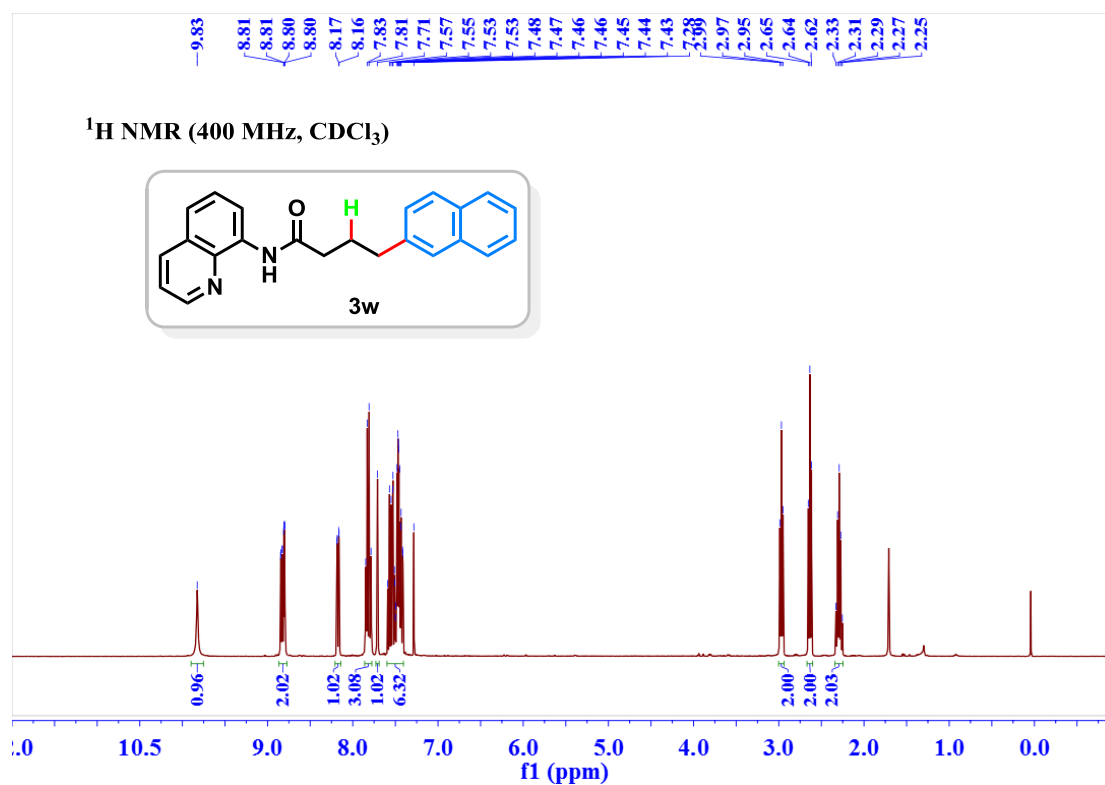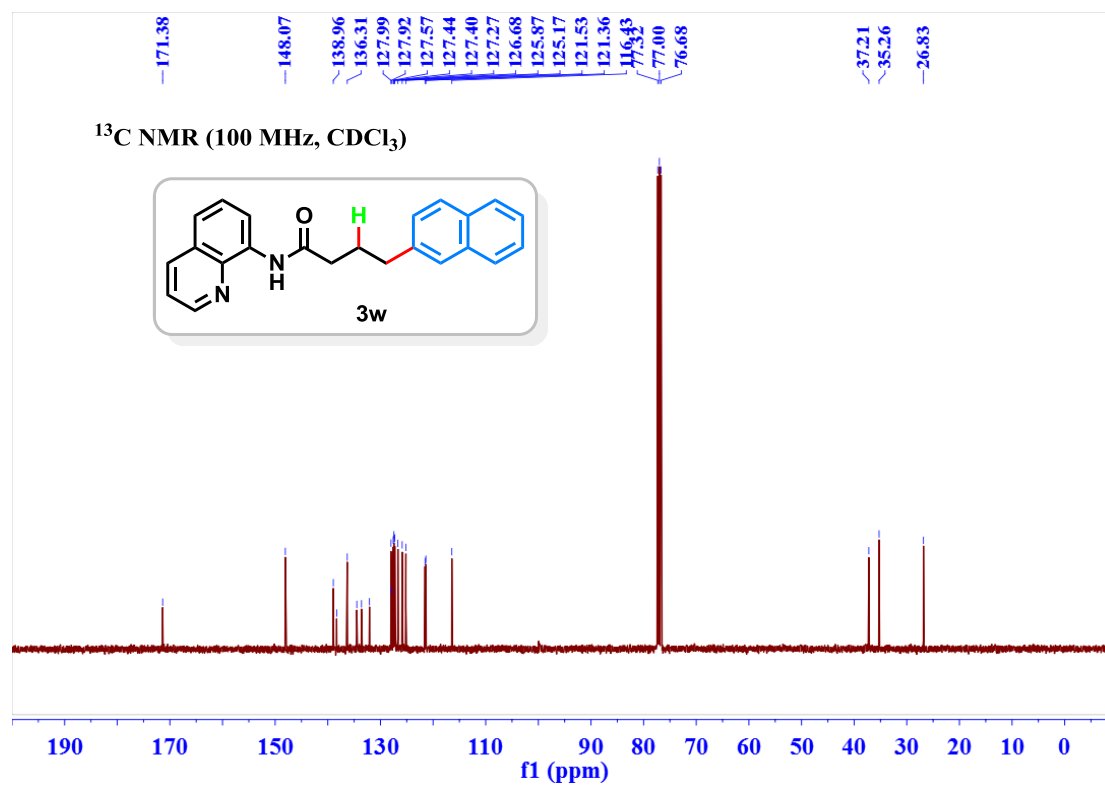



4-(benzo[d][1,3]dioxol-5-yl)-N-(quinolin-8-yl)butanamide (3x)

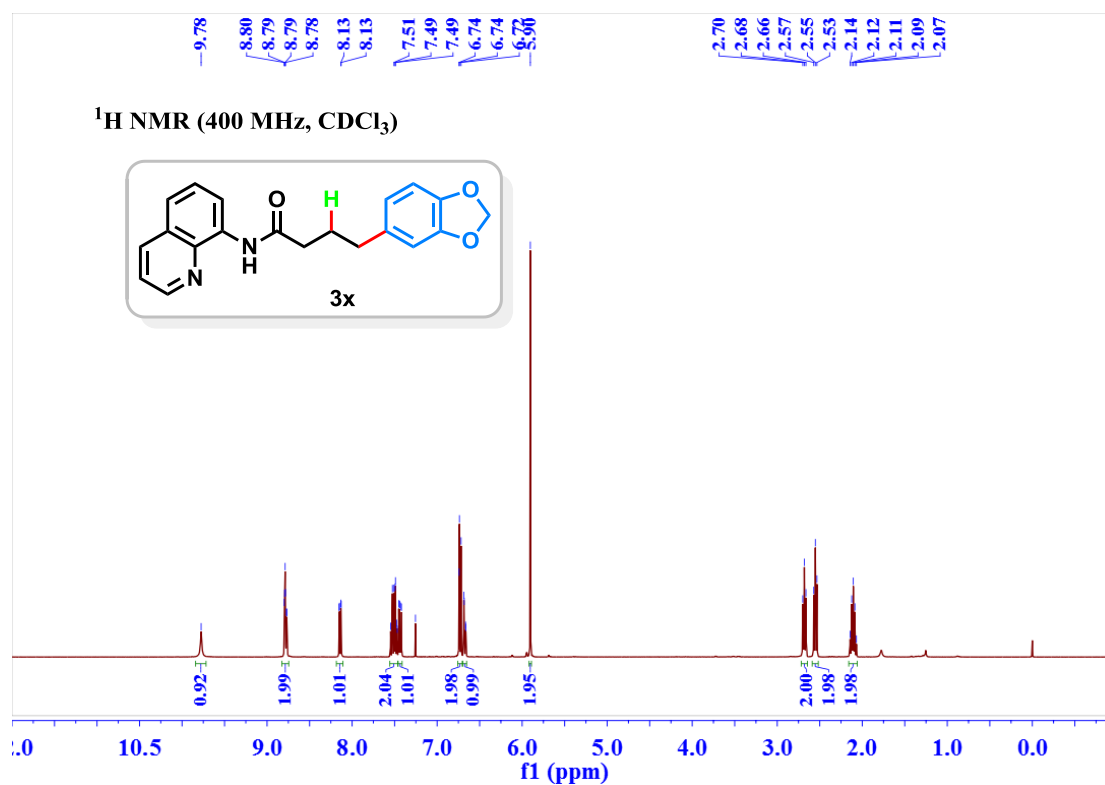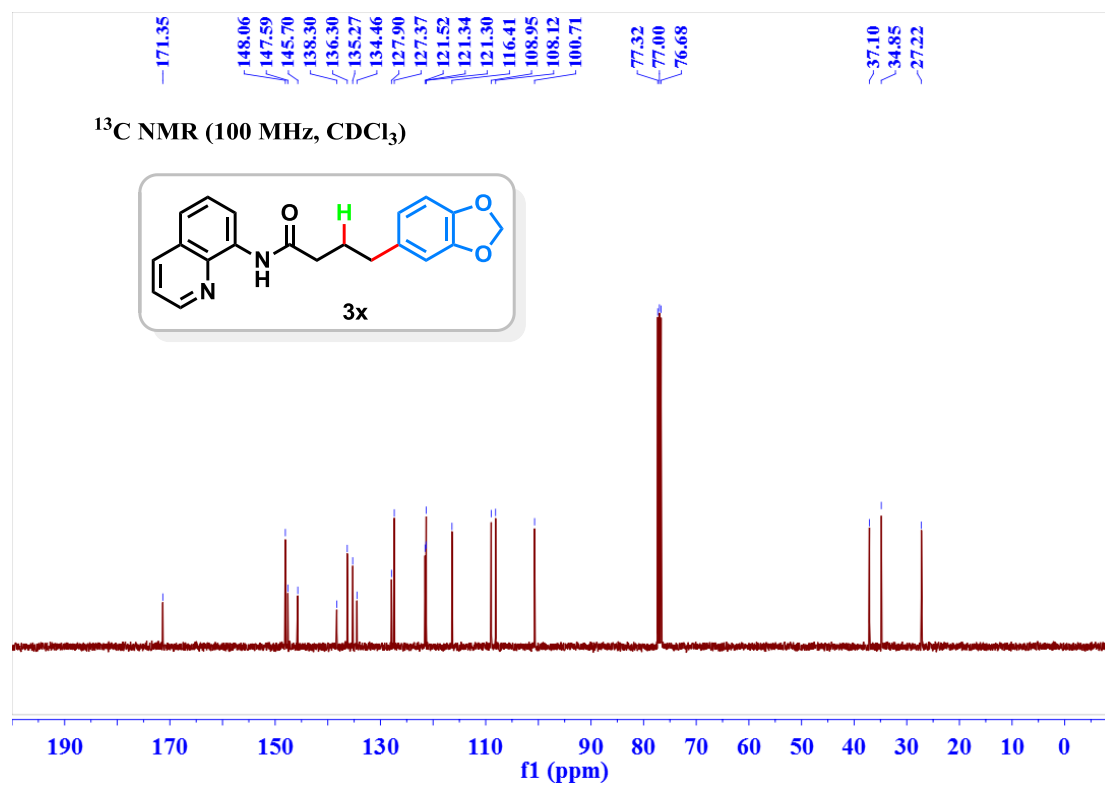

**4-(2,3-dihydrobenzo[b][1,4]dioxin-6-yl)-N-(quinolin-8-yl)butanamide (3y)**

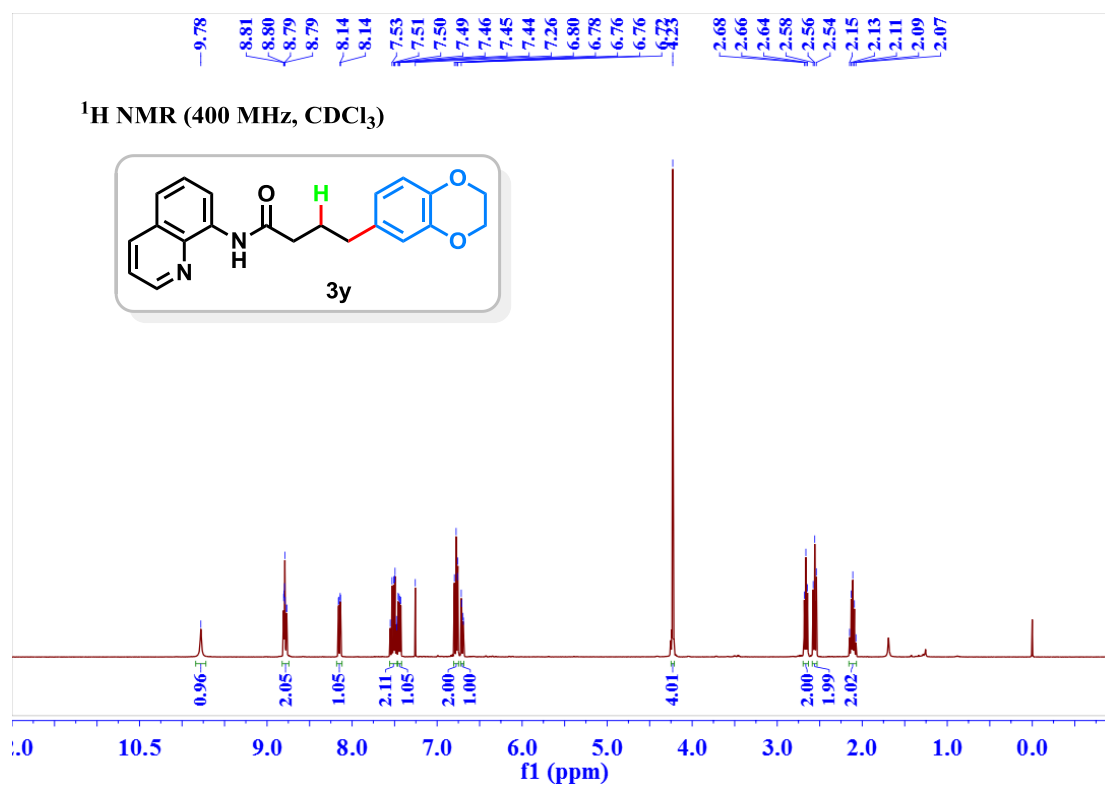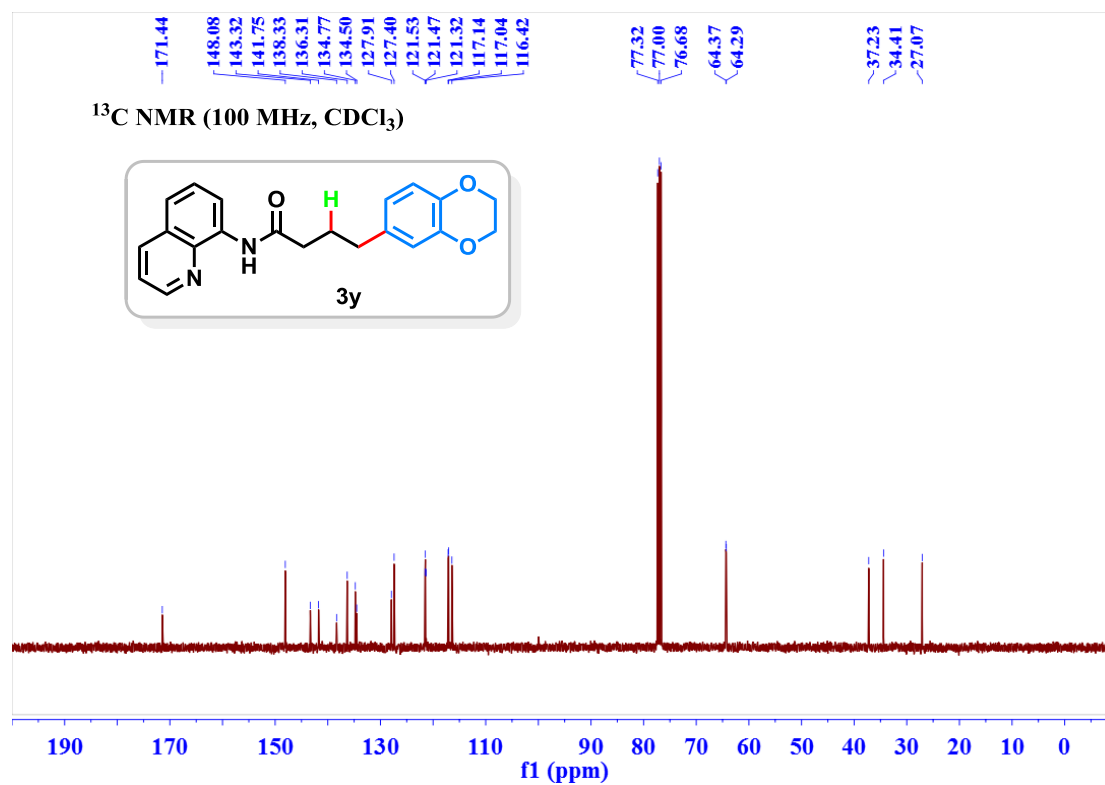

**4-(2,3-dimethylphenyl)-N-(quinolin-8-yl)butanamide (3z)**

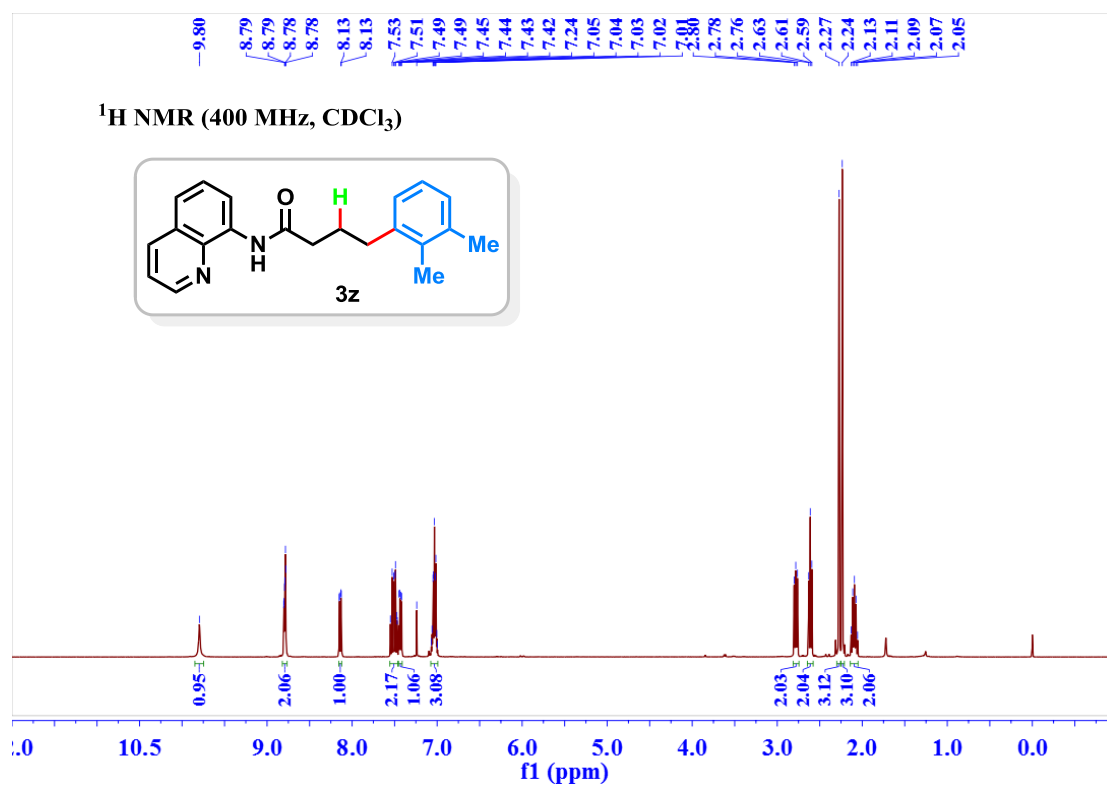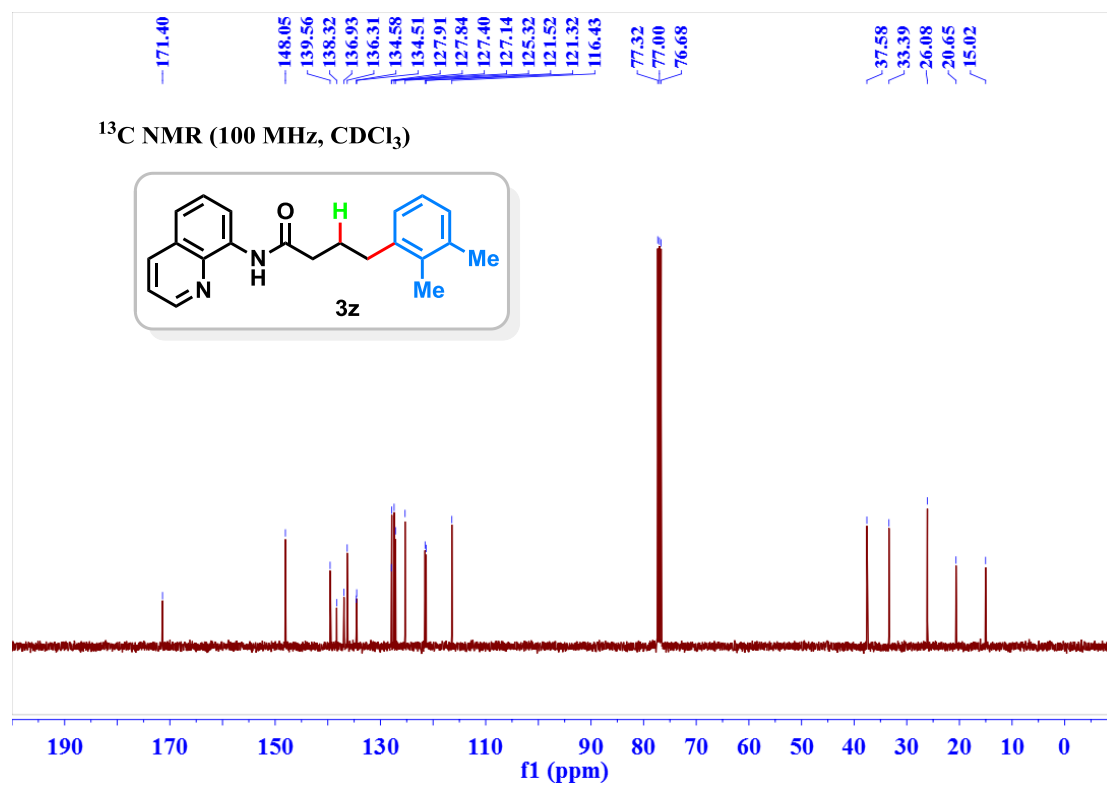

**4-(3-fluoro-2-methylphenyl)-*N*-(quinolin-8-yl)butanamide (3aa)**

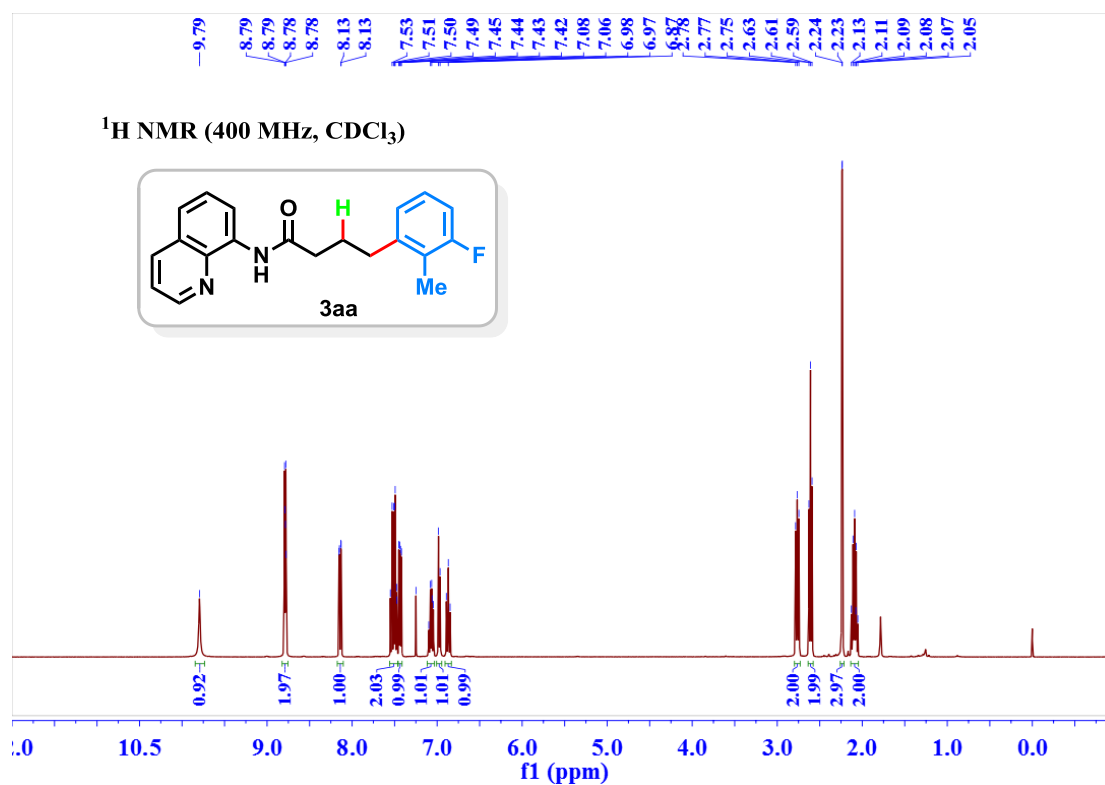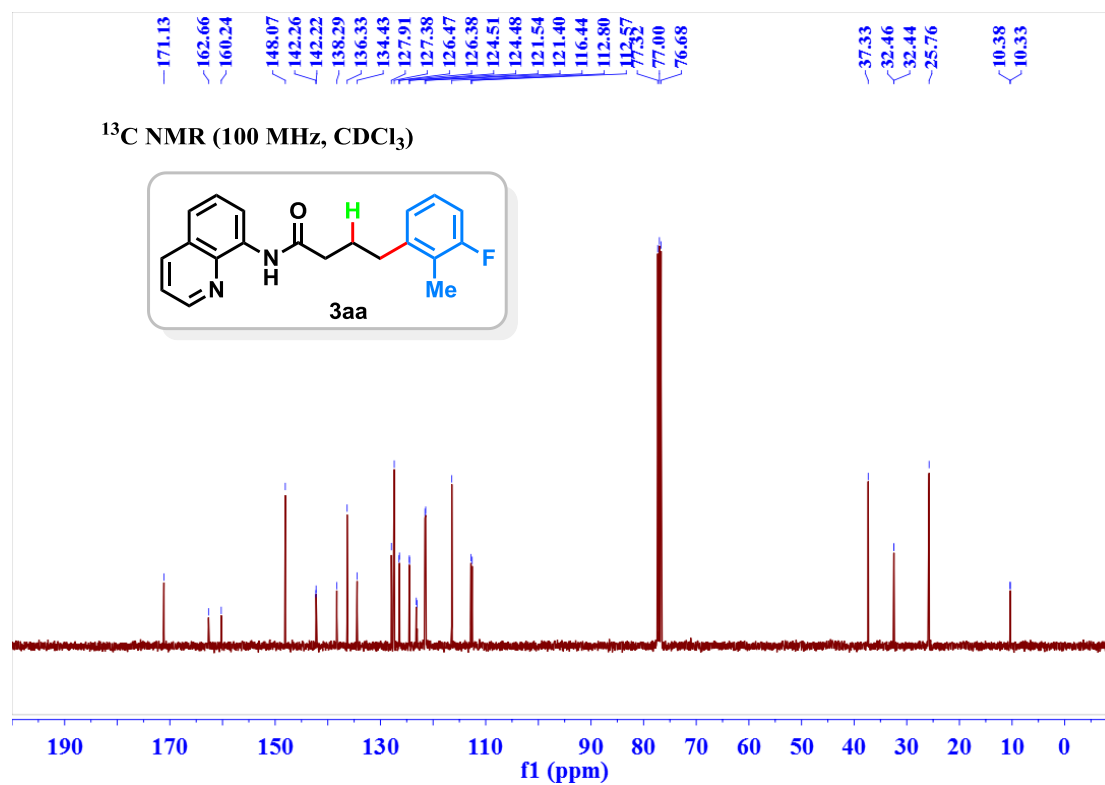

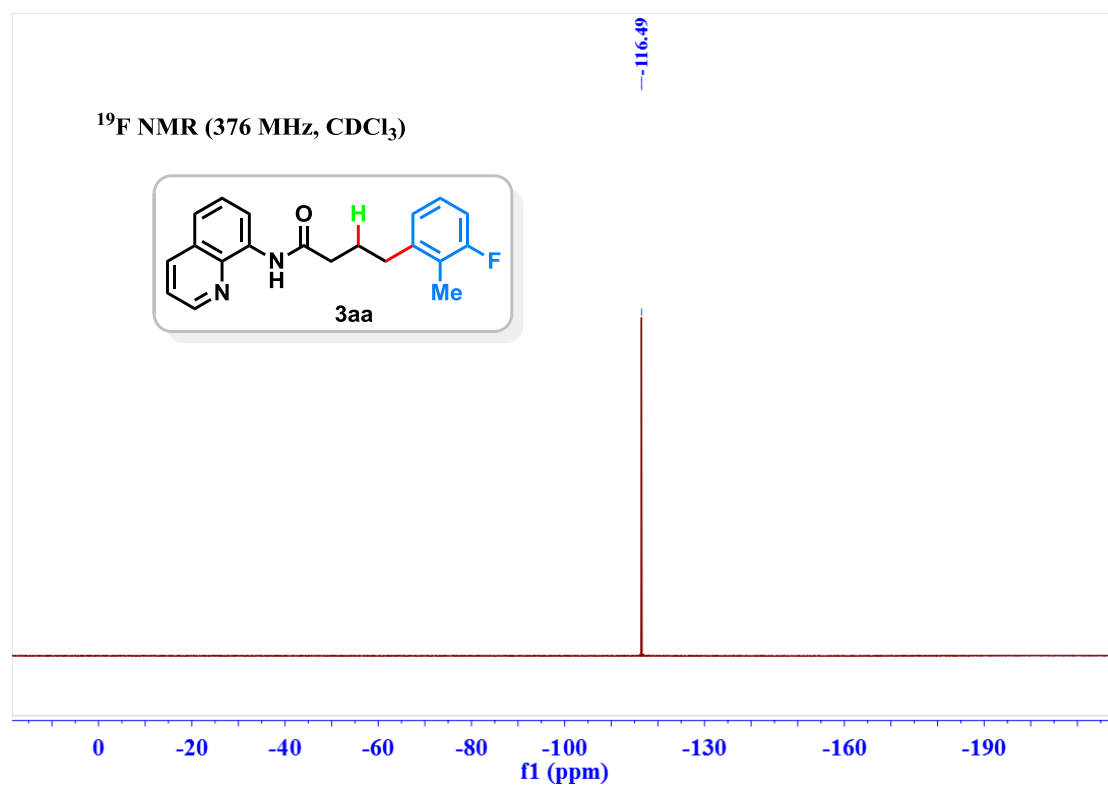

**4-(2,4-dimethylphenyl)-*N*-(quinolin-8-yl)butanamide (3ab)**

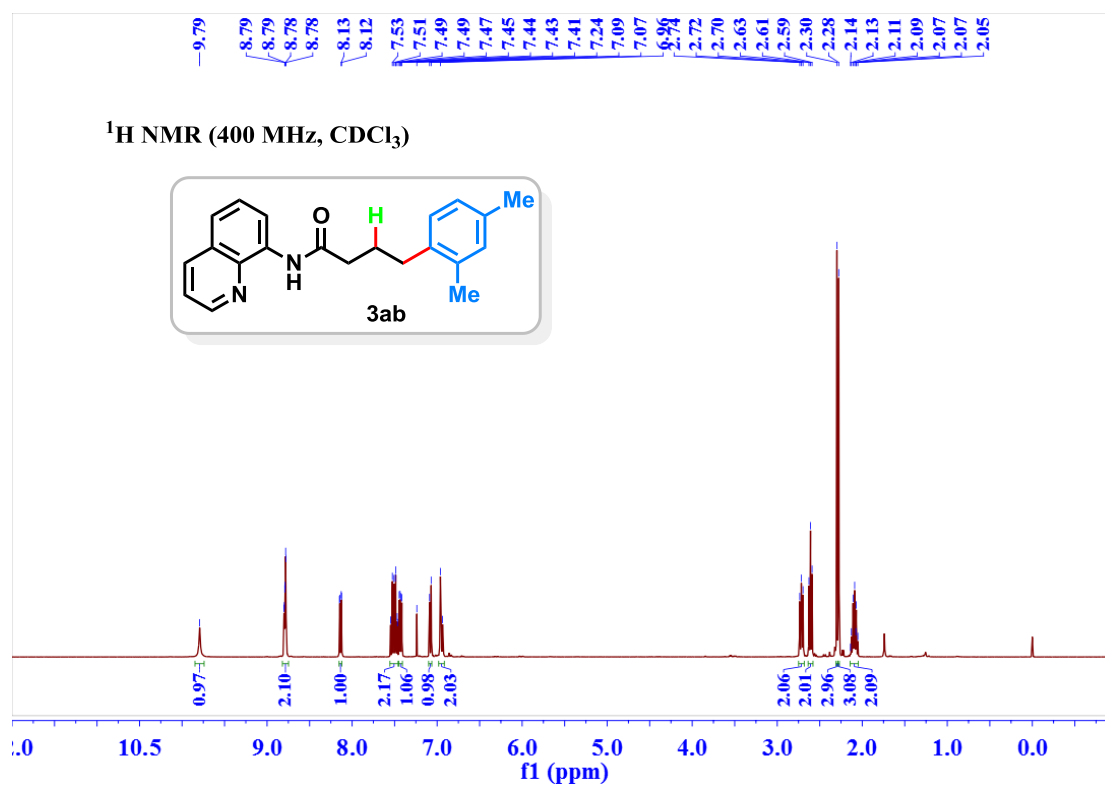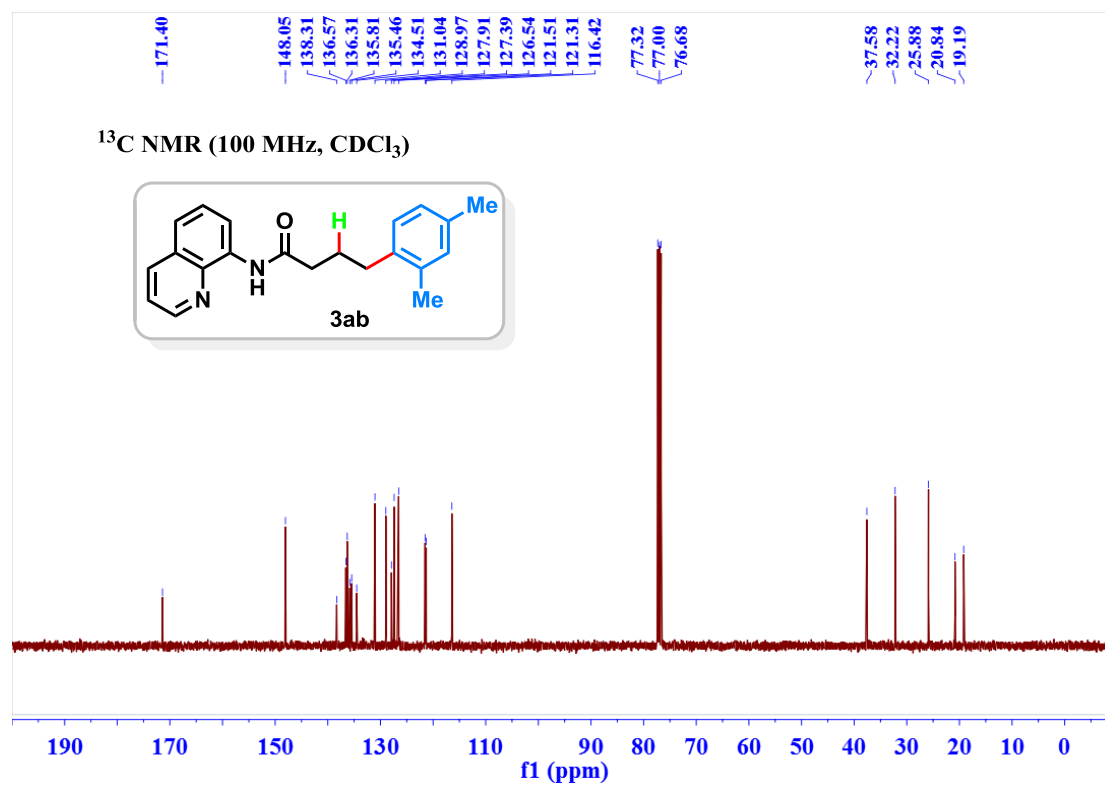

**4-(4-methoxy-2-methylphenyl)-N-(quinolin-8-yl)butanamide (3ac)**

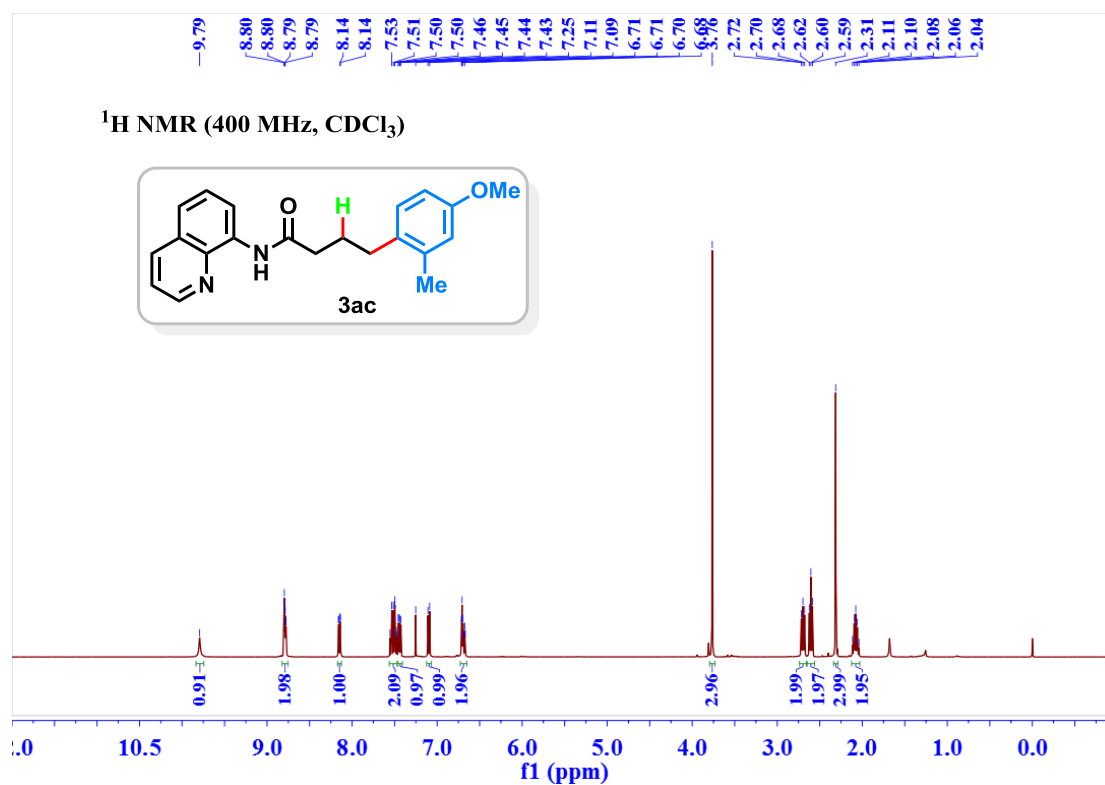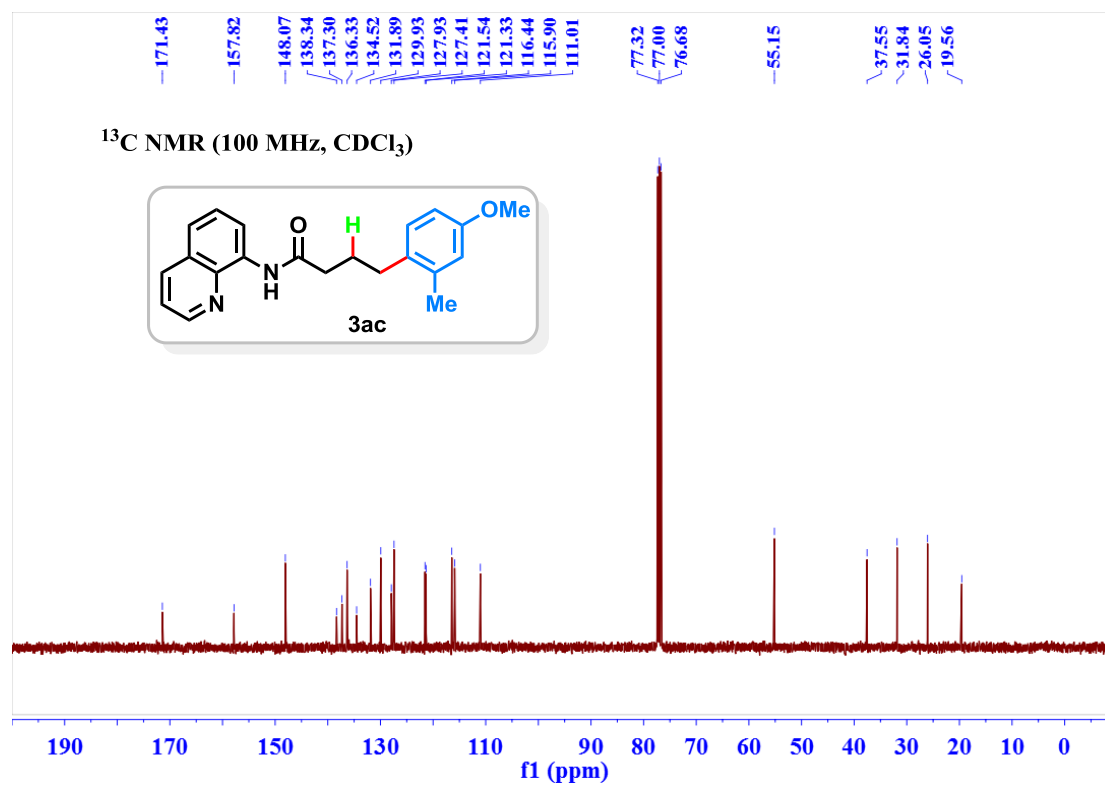

**4-(5-fluoro-2-methylphenyl)-*N*-(quinolin-8-yl)butanamide (3ad)**

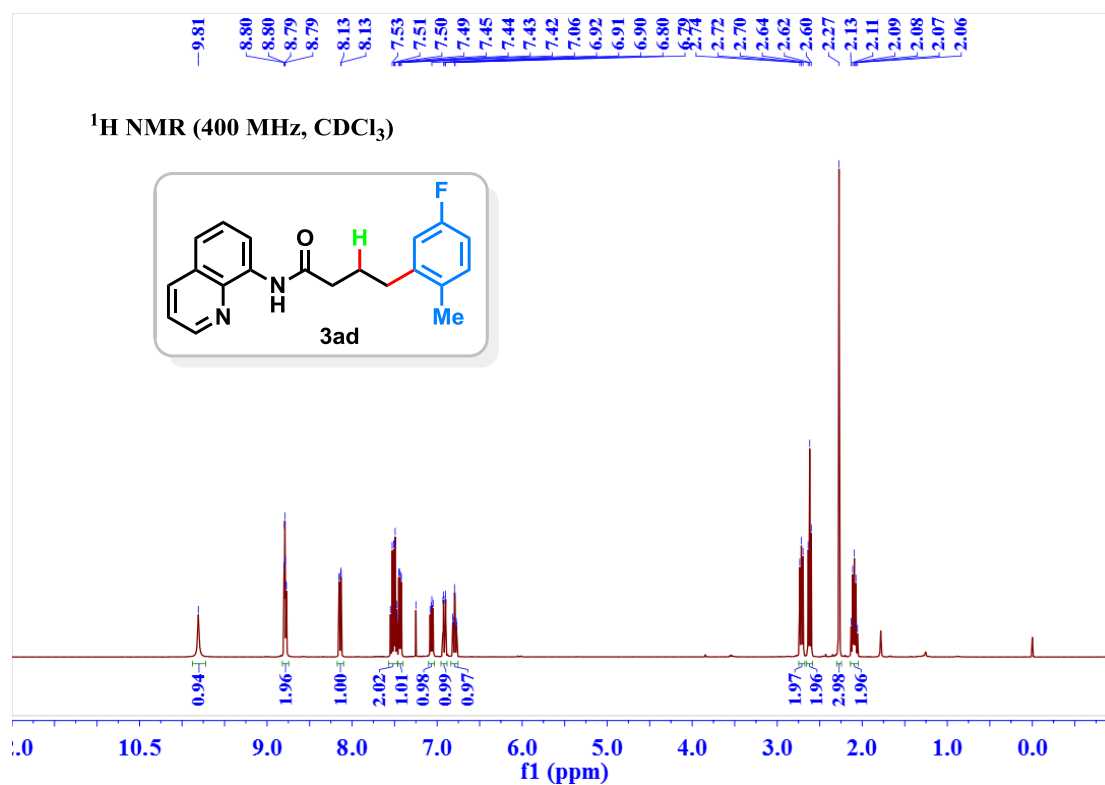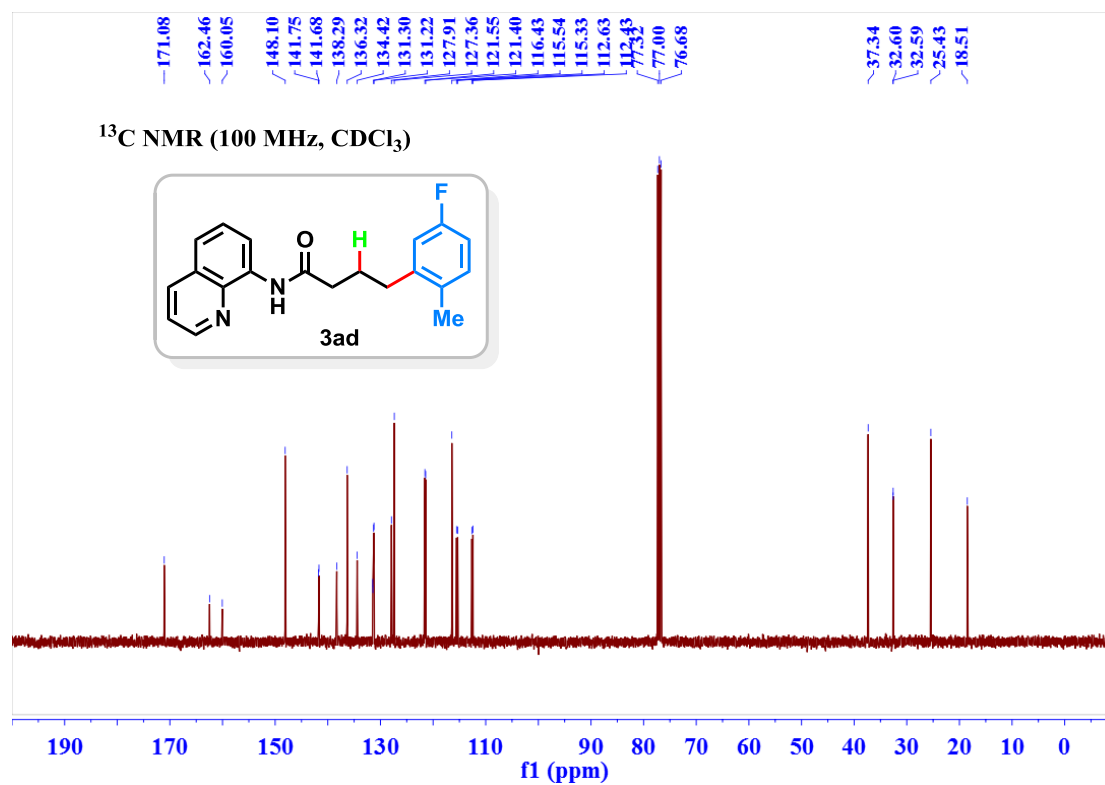



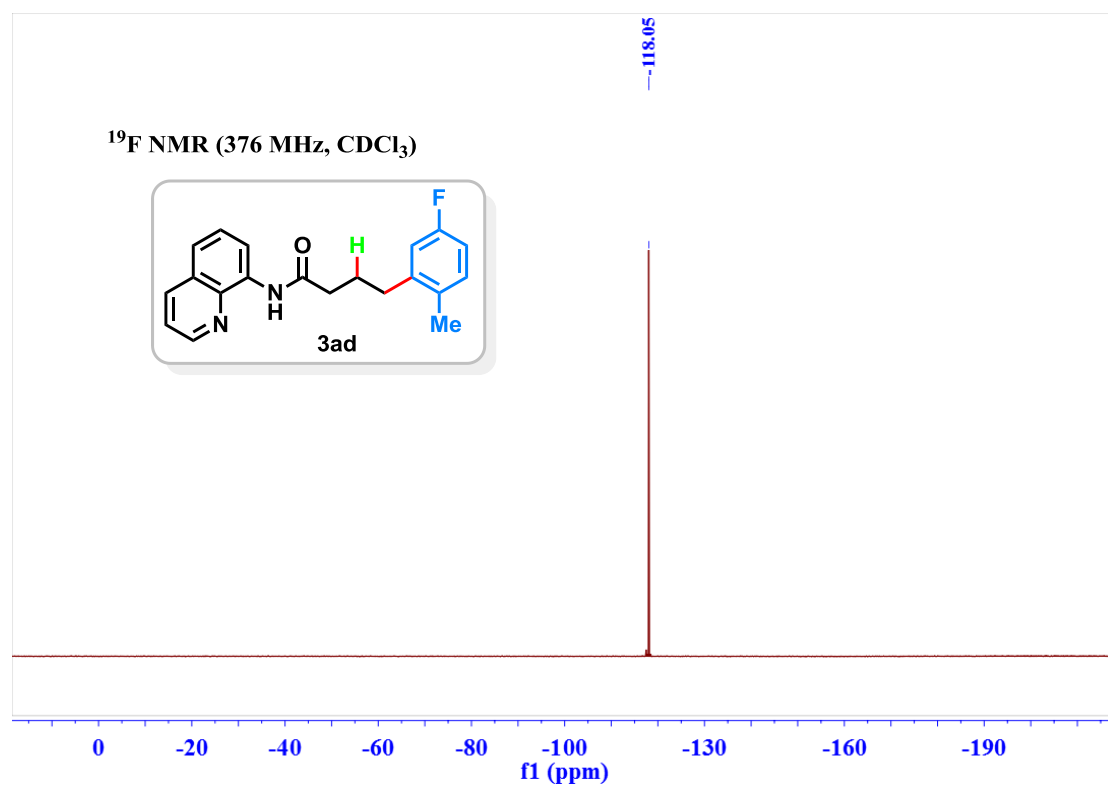

**4-(2,5-dimethylphenyl)-N-(quinolin-8-yl)butanamide (3ae)**

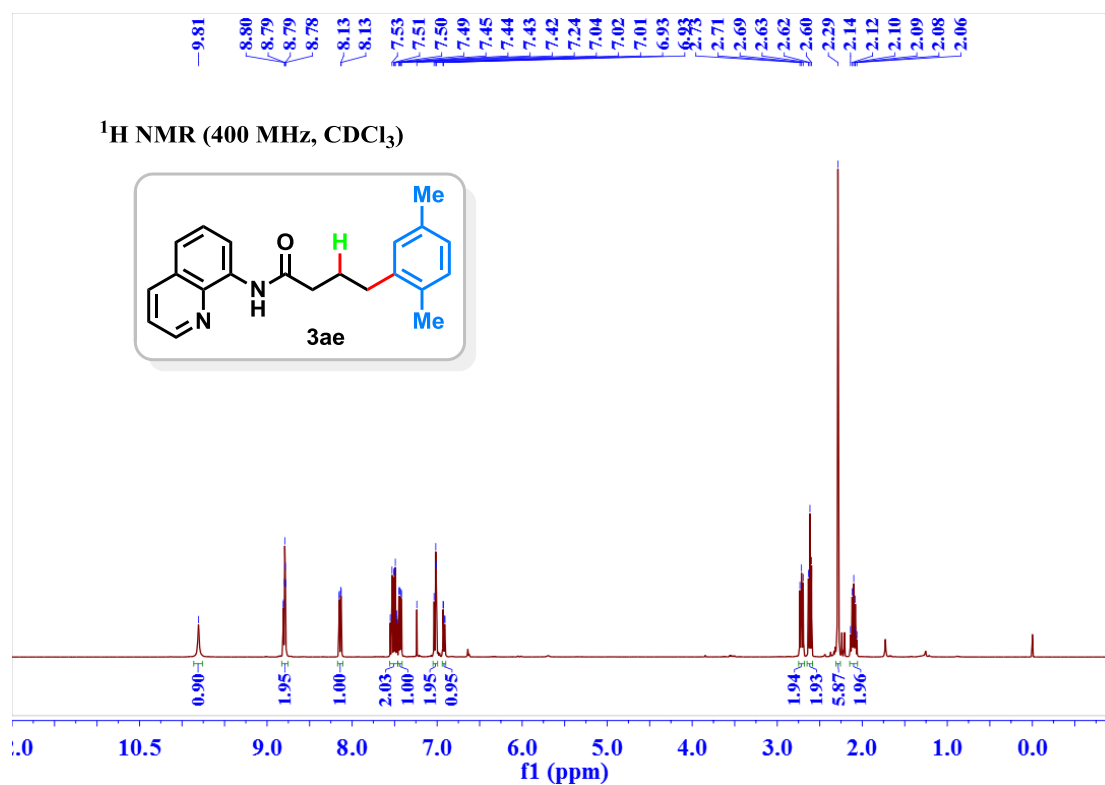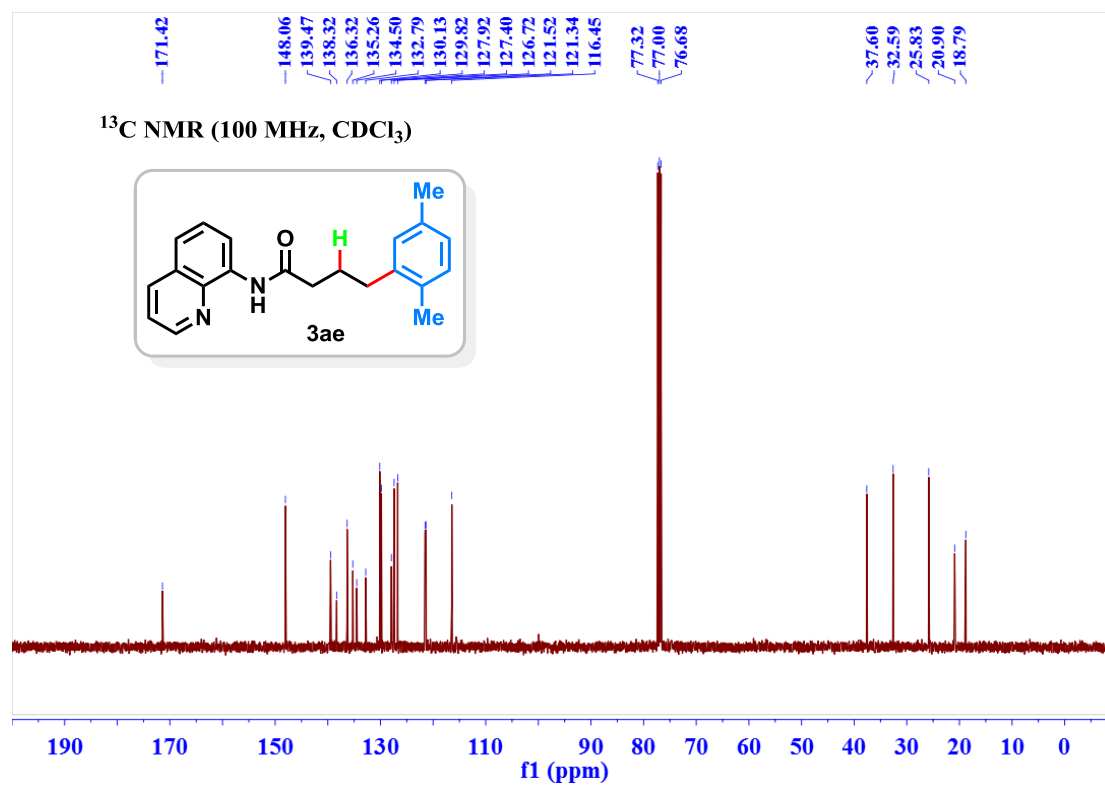

**4-(4-fluoro-3-methylphenyl)-*N*-(quinolin-8-yl)butanamide (3af)**

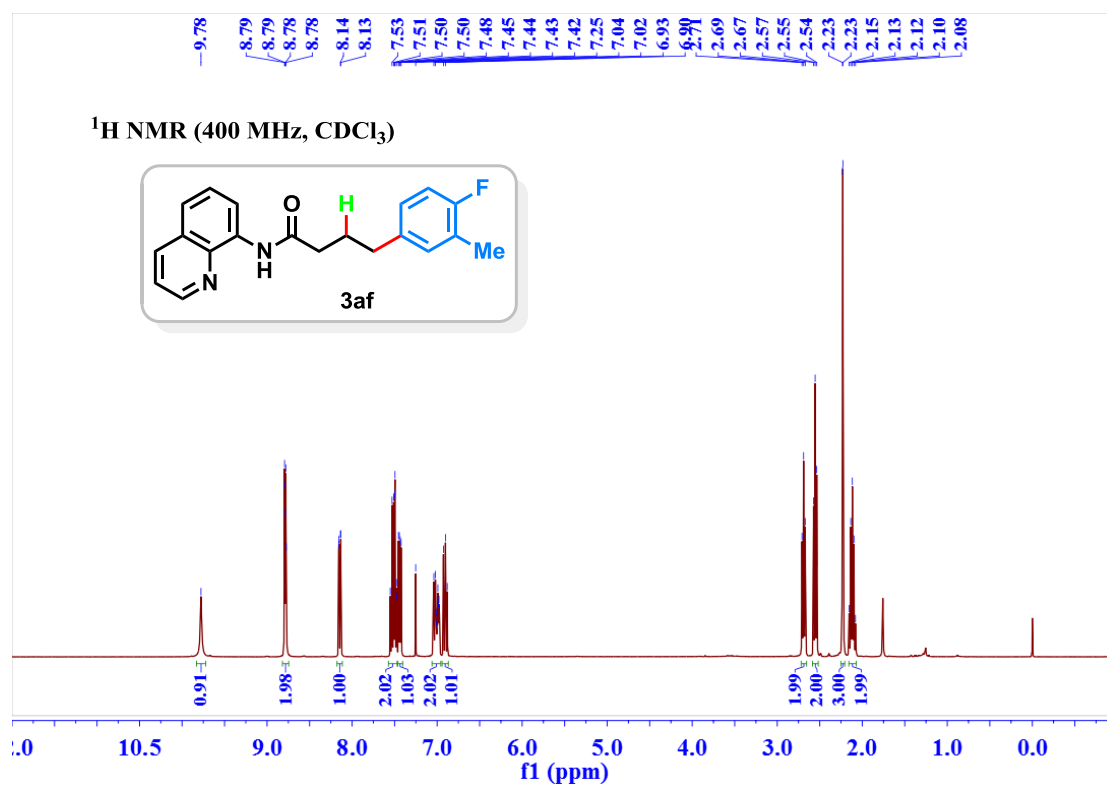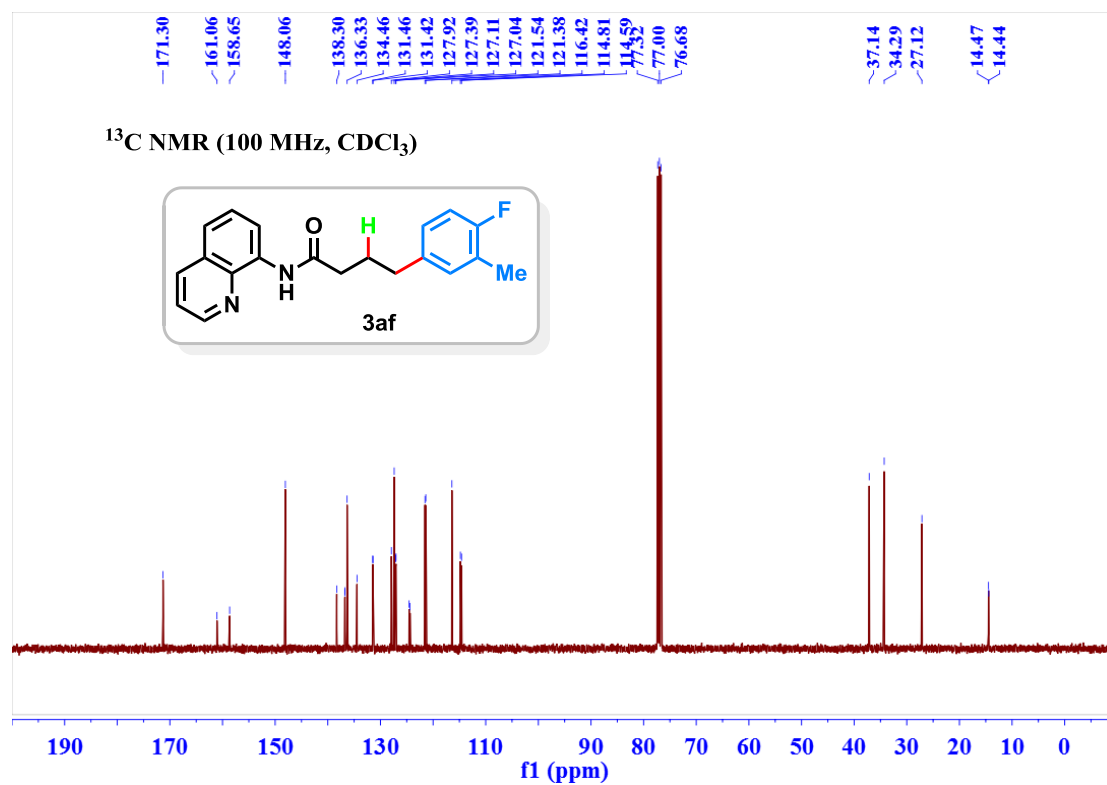

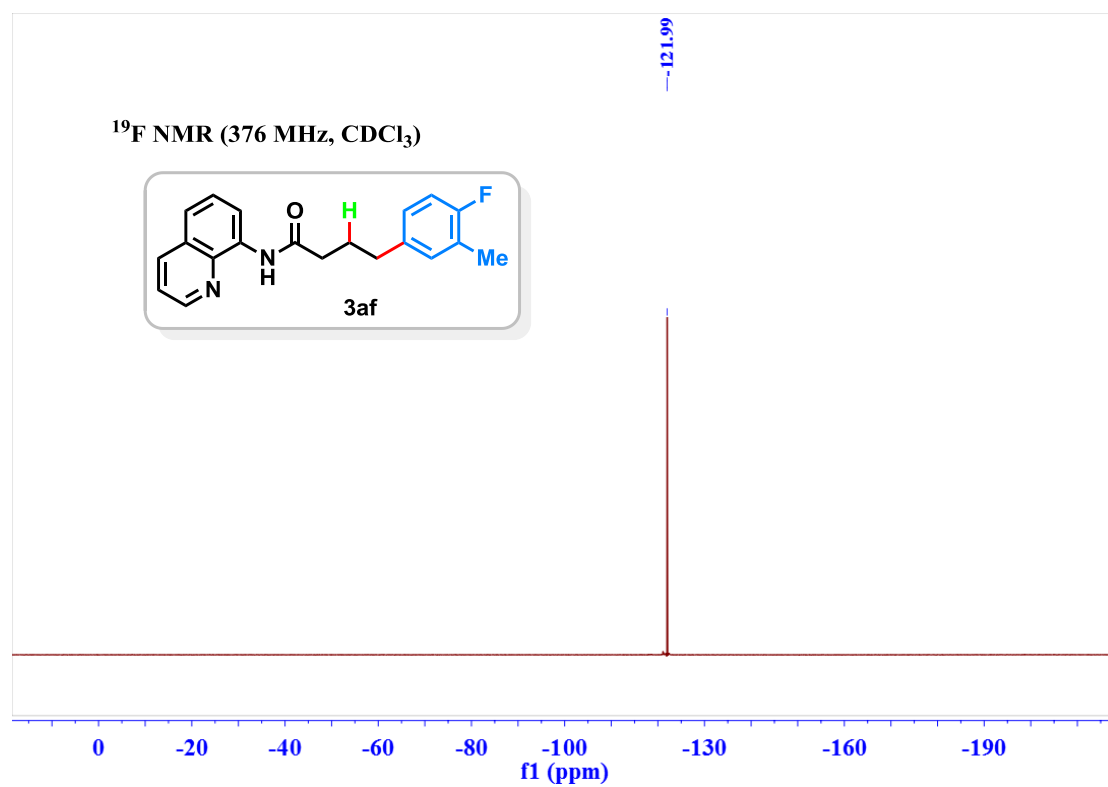

4-(4-chloro-3-methylphenyl)-N-(quinolin-8-yl)butanamide (3ag)

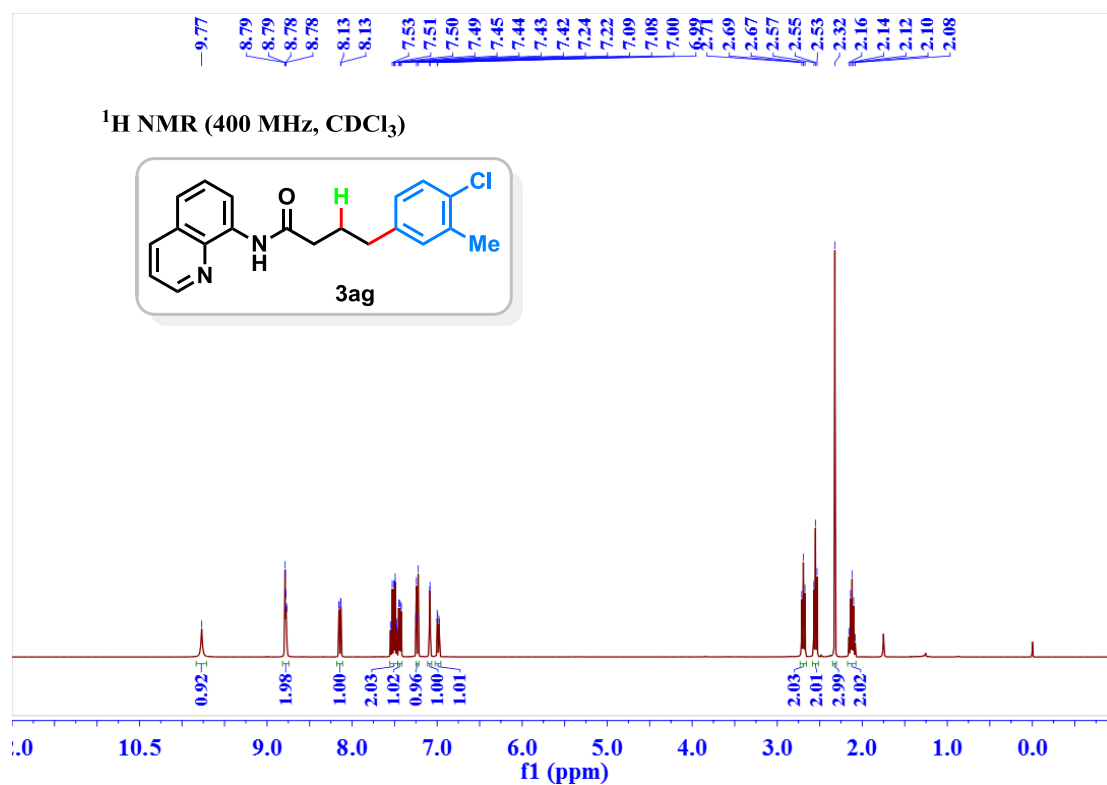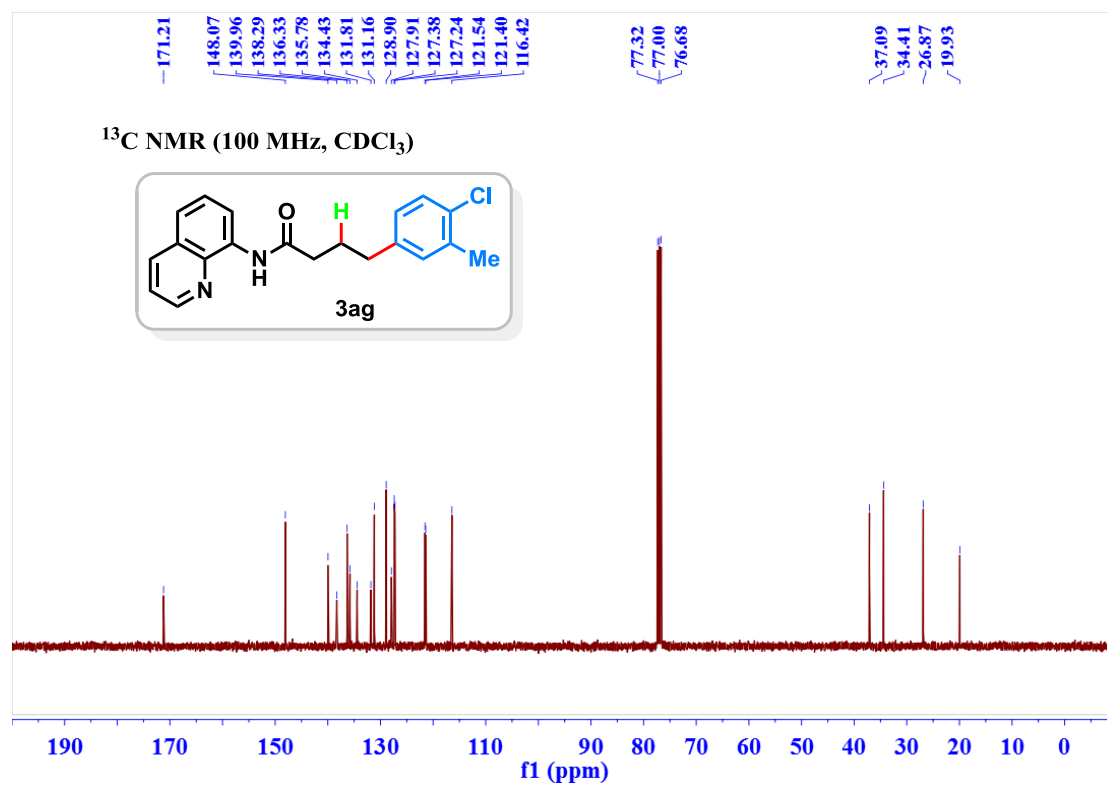

4-(4-methoxy-3-methylphenyl)-*N*-(quinolin-8-yl)butanamide (3ah)

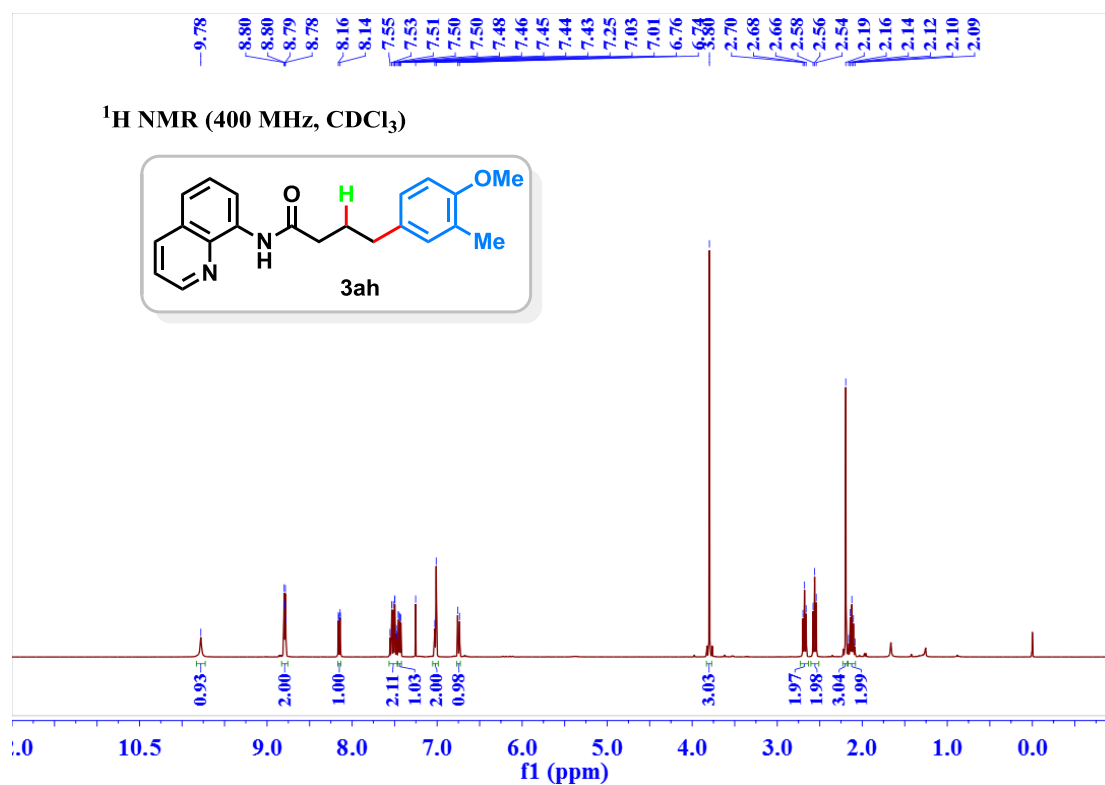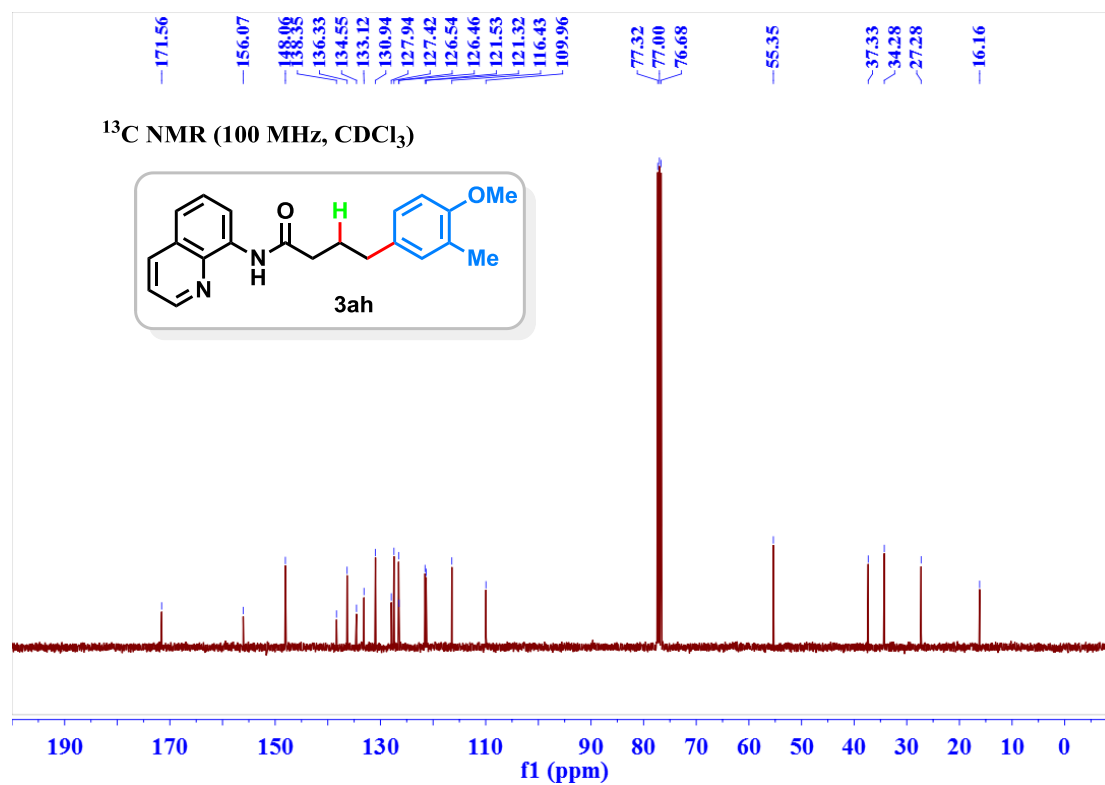

**4-(4-fluoro-2-methoxyphenyl)-N-(quinolin-8-yl)butanamide (3ai)**

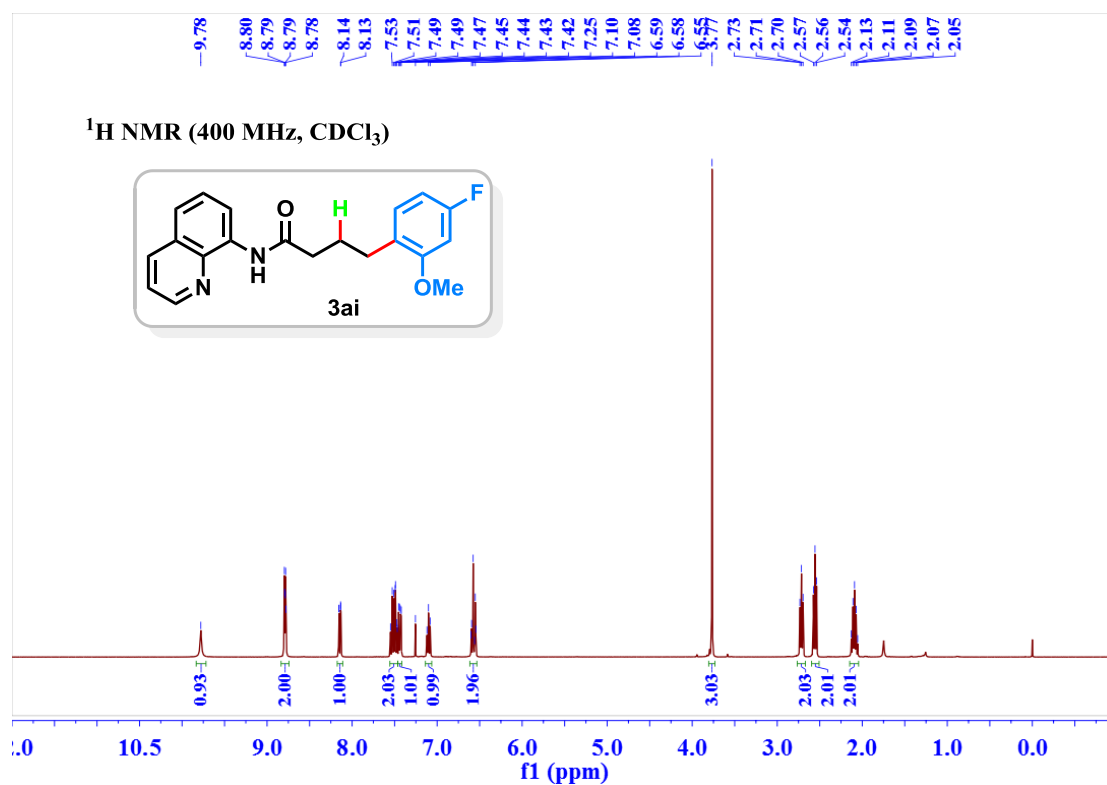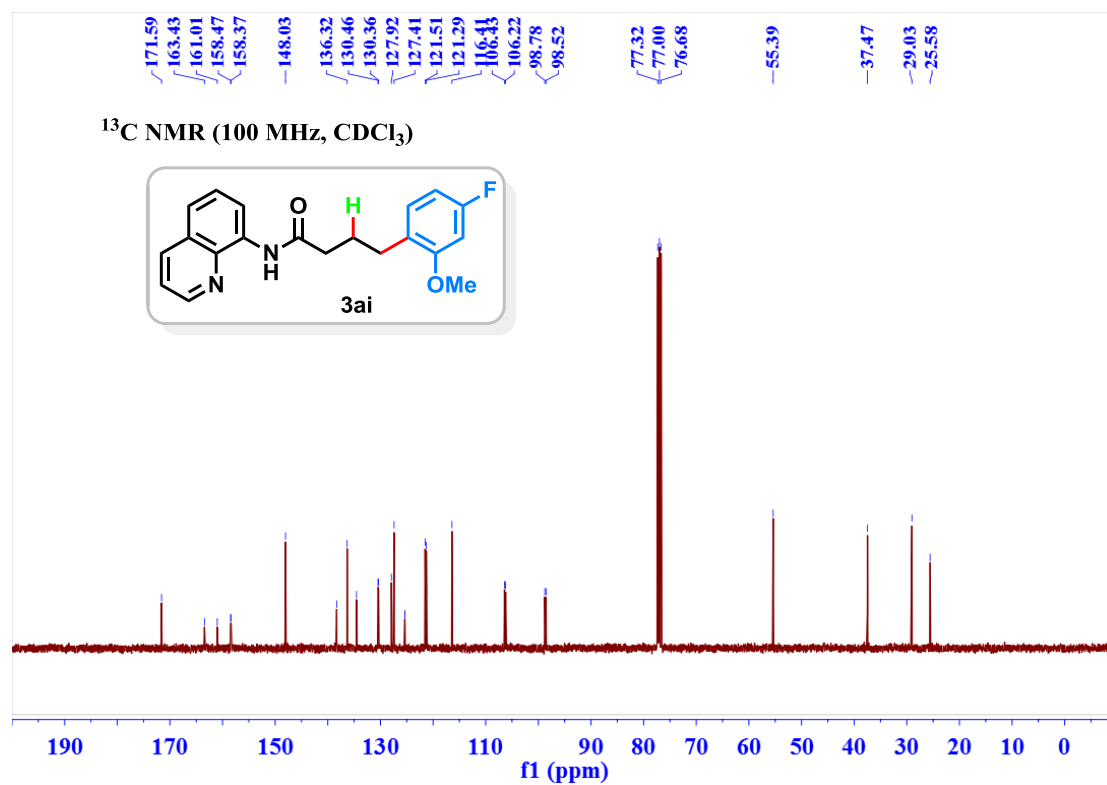

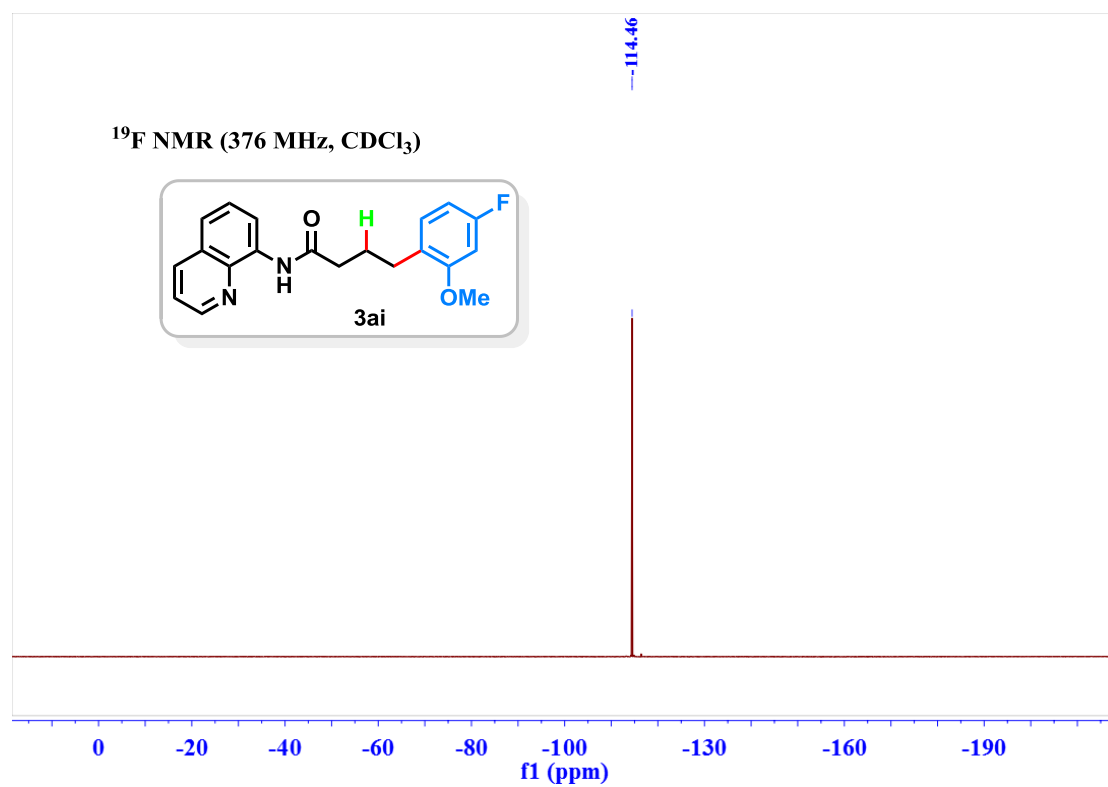



**4-(2,4-dimethoxyphenyl)-*N*-(quinolin-8-yl)butanamide (3aj)**

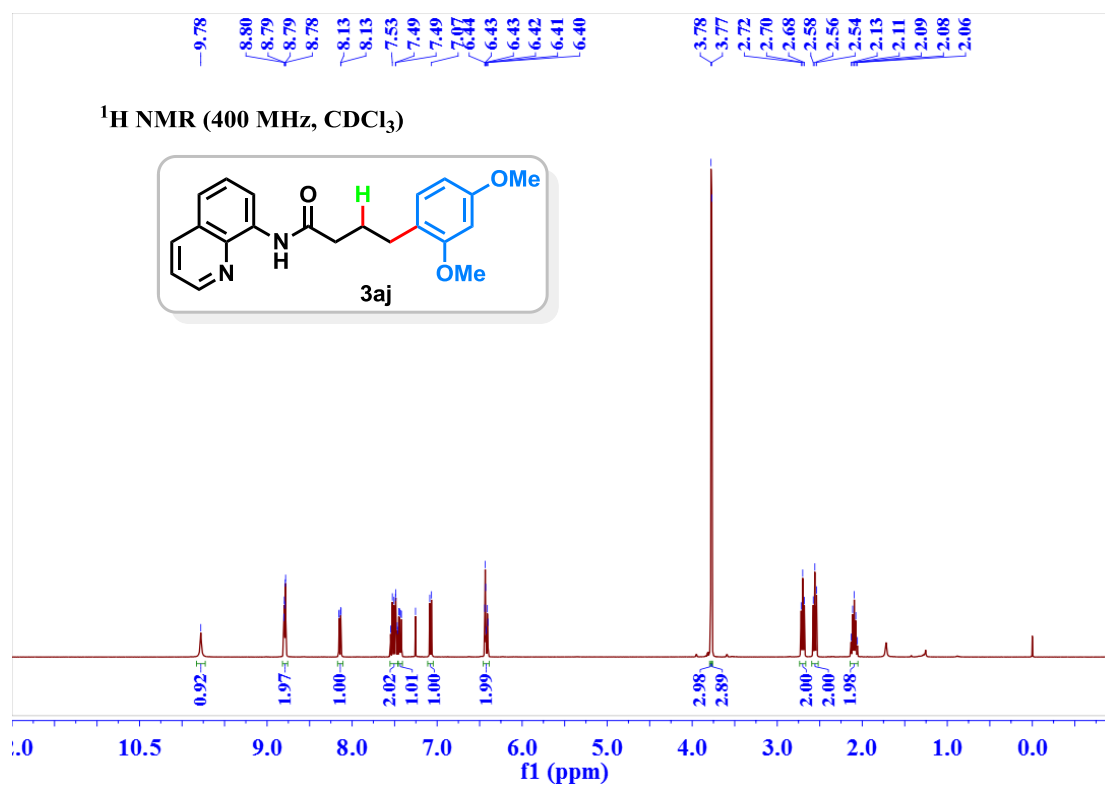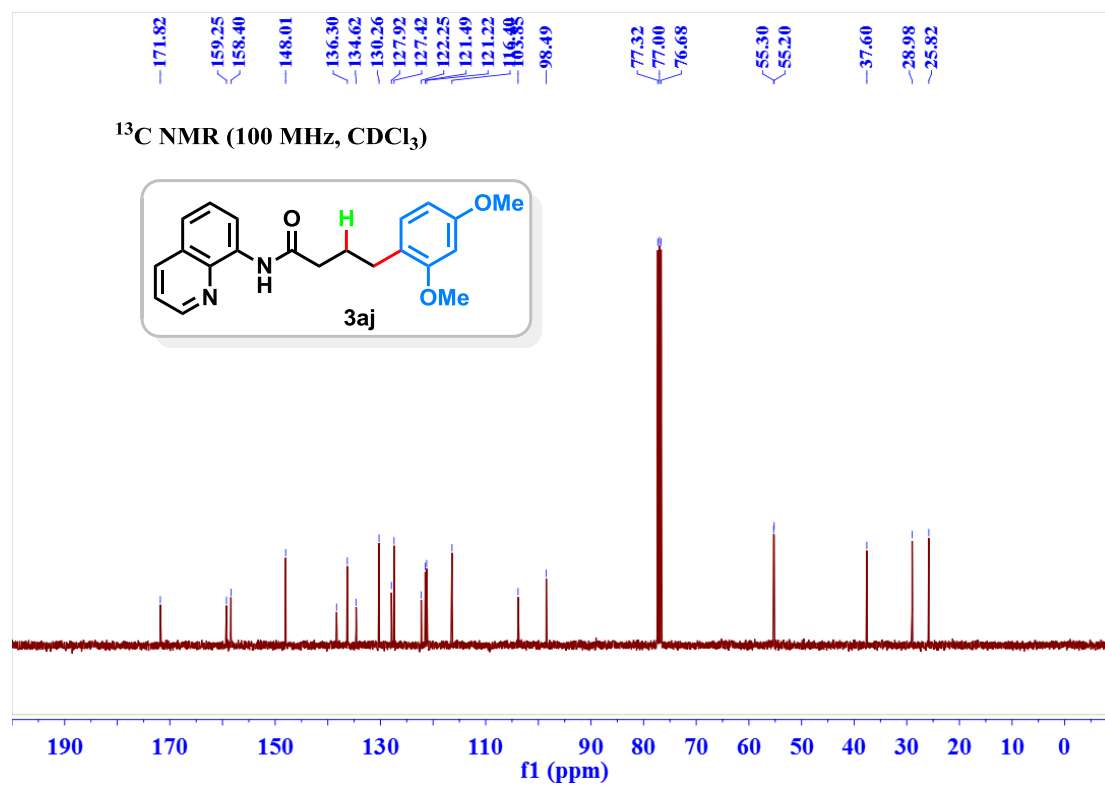

**4-(3,4-dimethoxyphenyl)-*N*-(quinolin-8-yl)butanamide (3ak)**

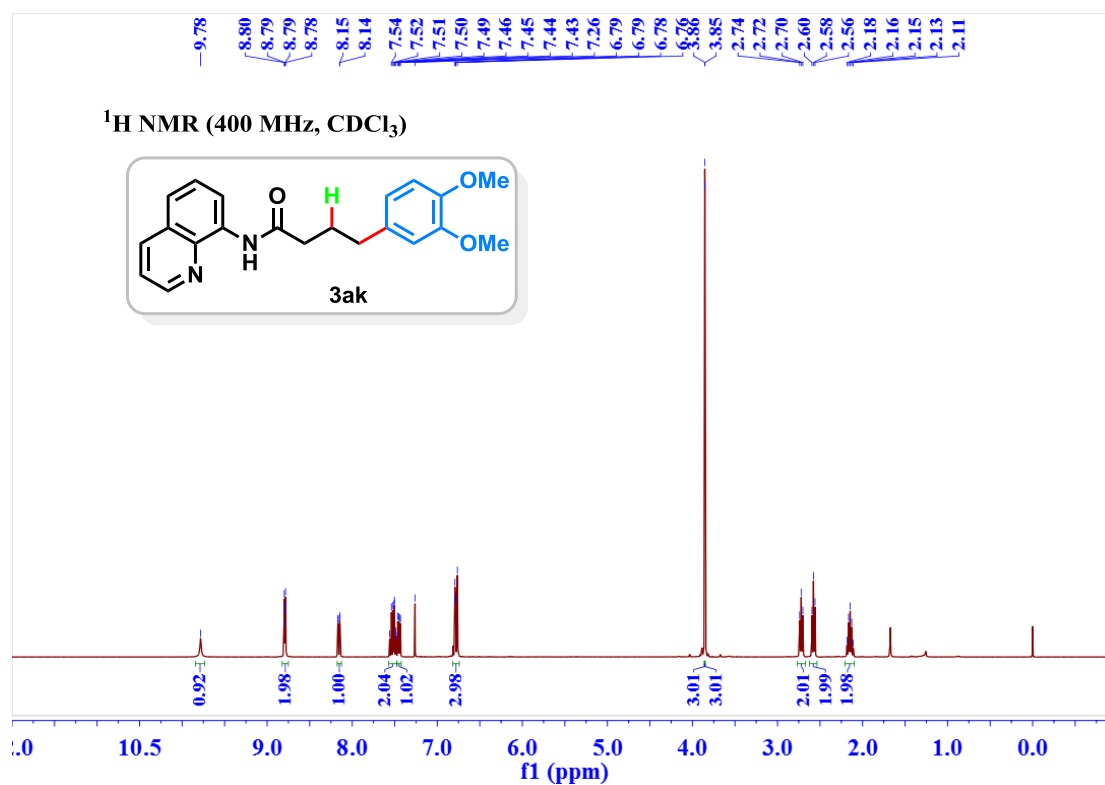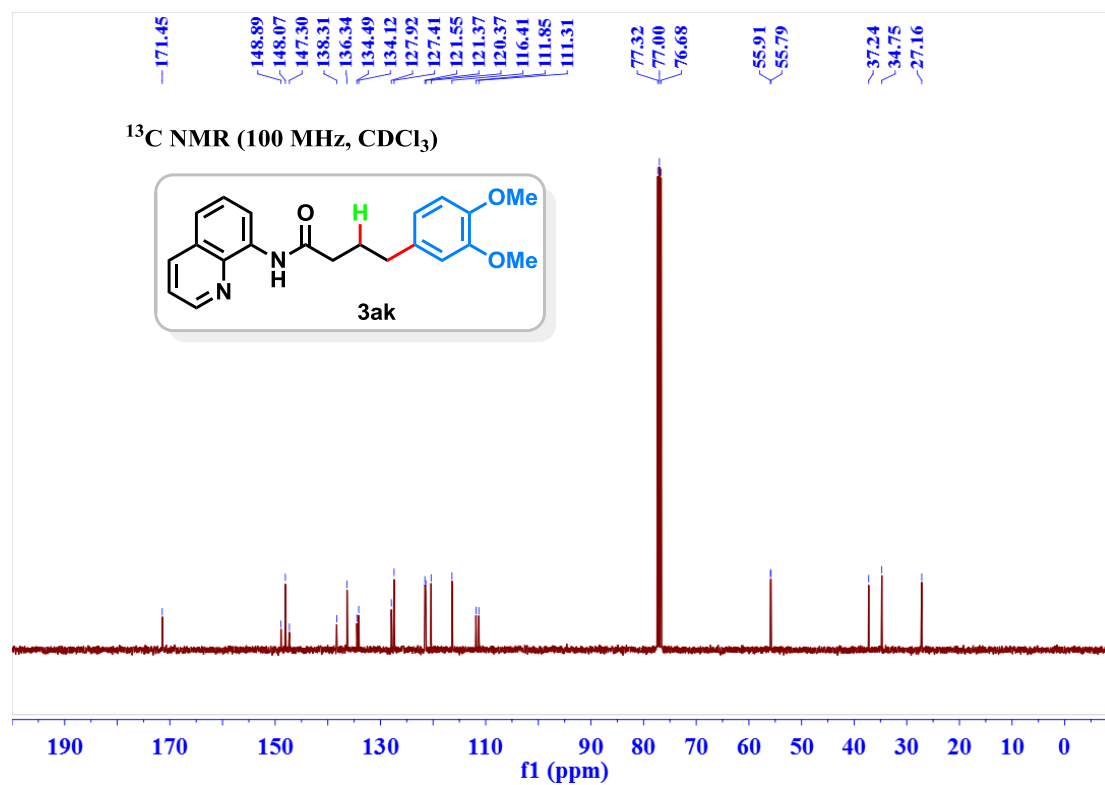

**4-(3,5-dimethylphenyl)-*N*-(quinolin-8-yl)butanamide (3al)**

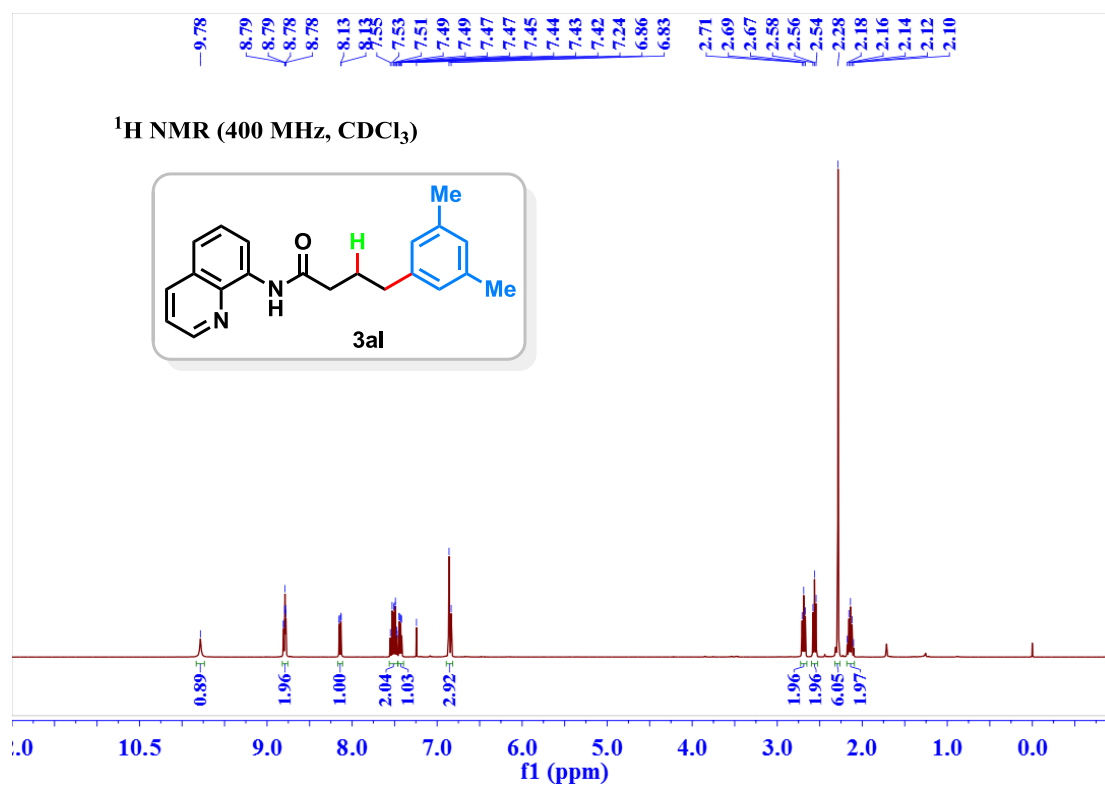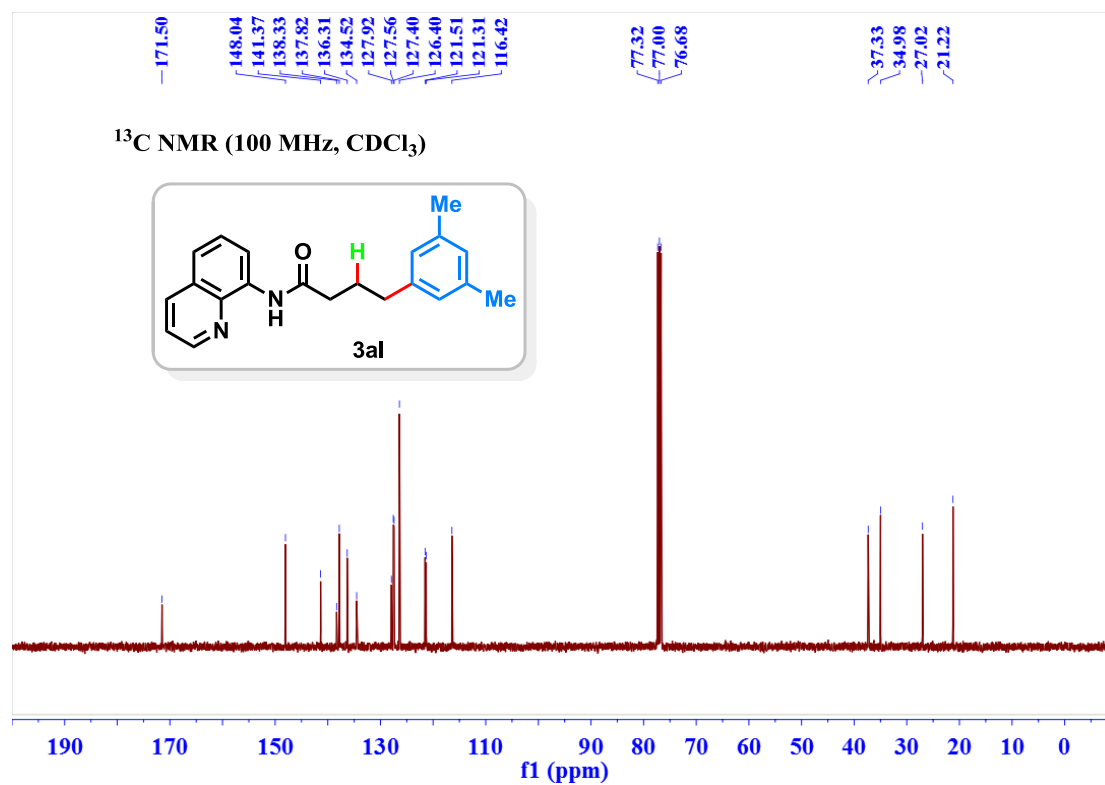

**4-(3-fluoro-5-methoxyphenyl)-N-(quinolin-8-yl)butanamide (3am)**

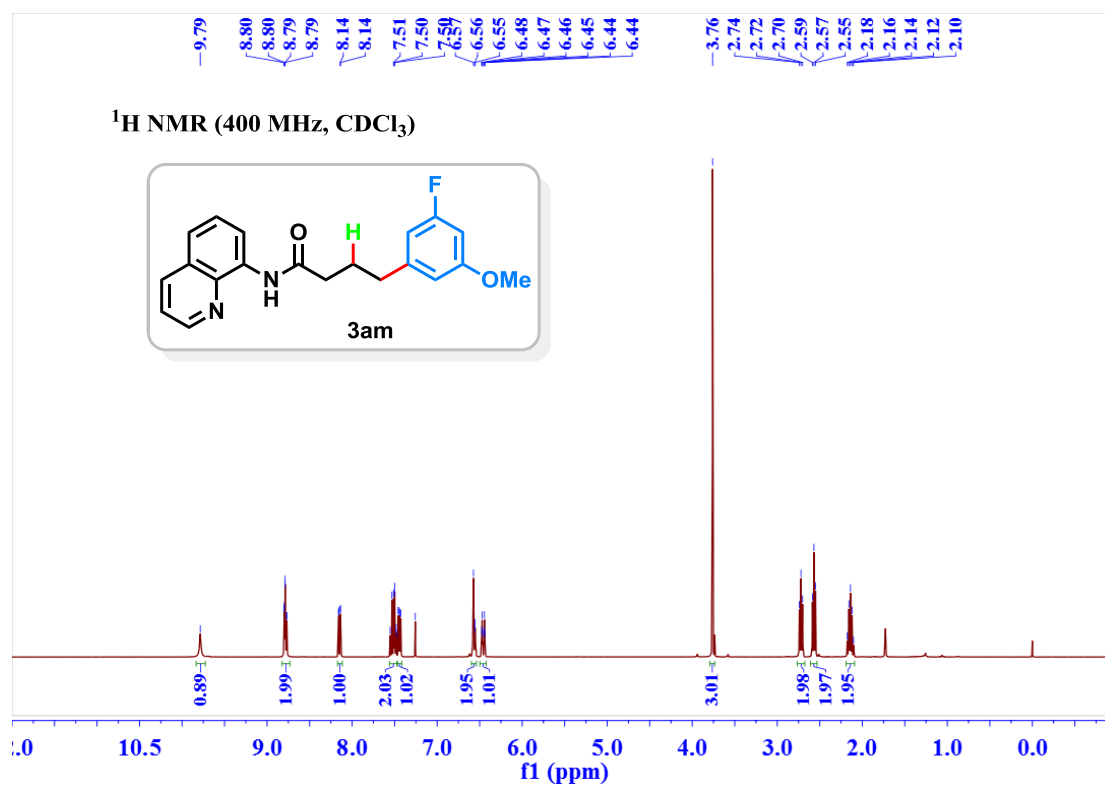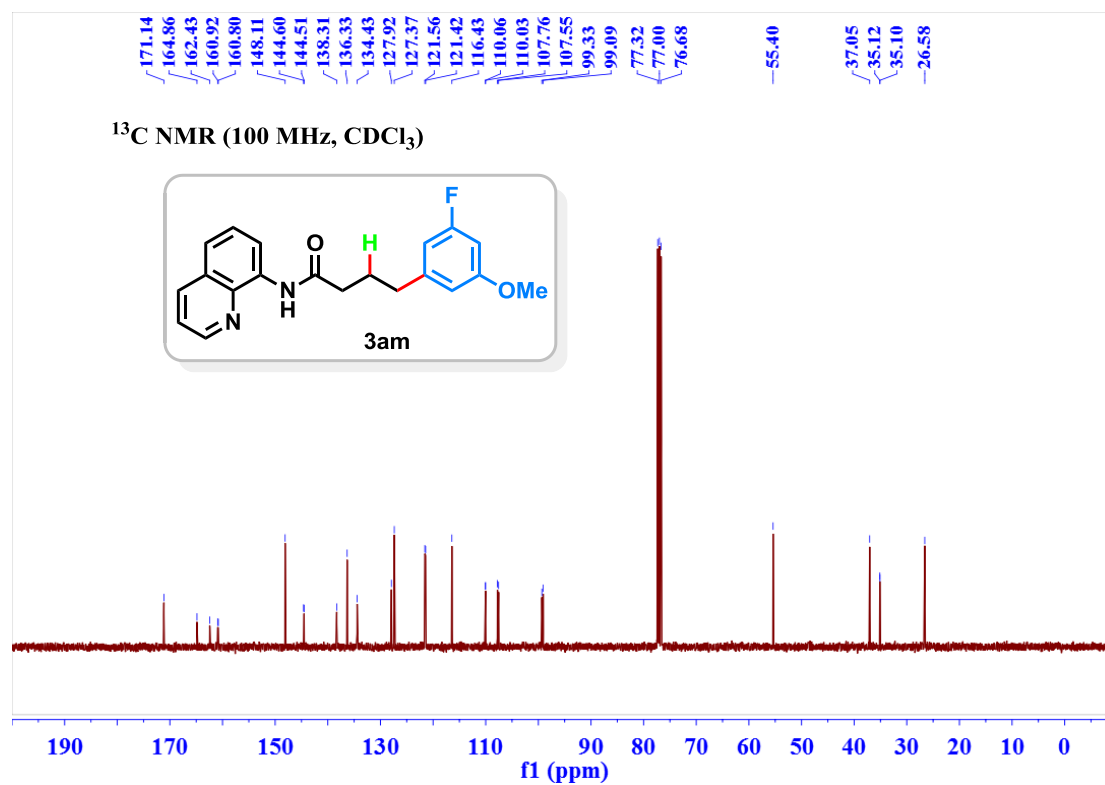

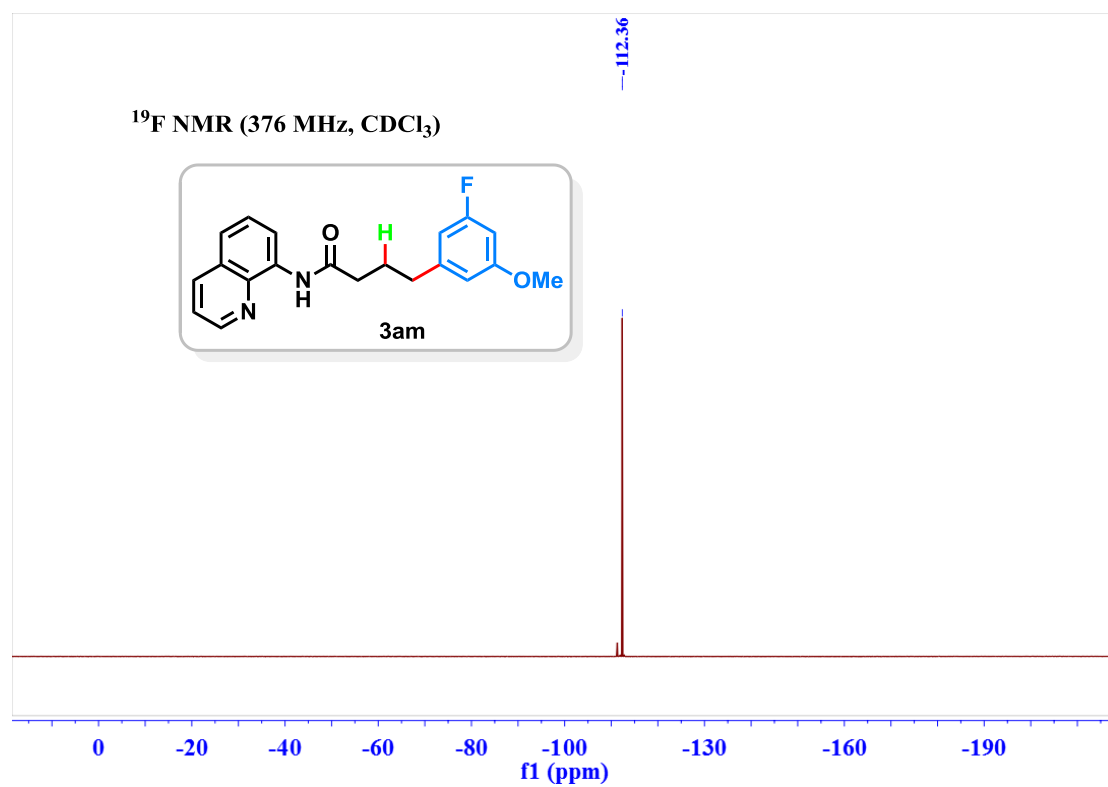

***N*-(quinolin-8-yl)-4-(2,4,5-trimethylphenyl)butanamide (3an)**

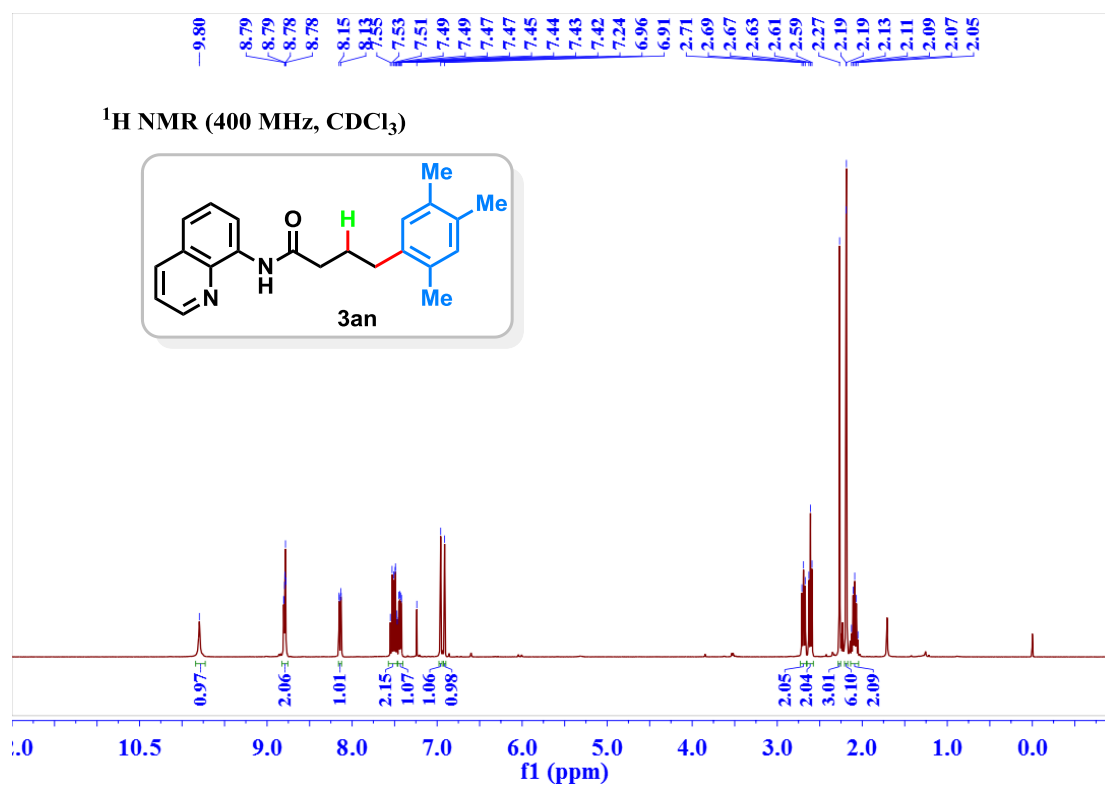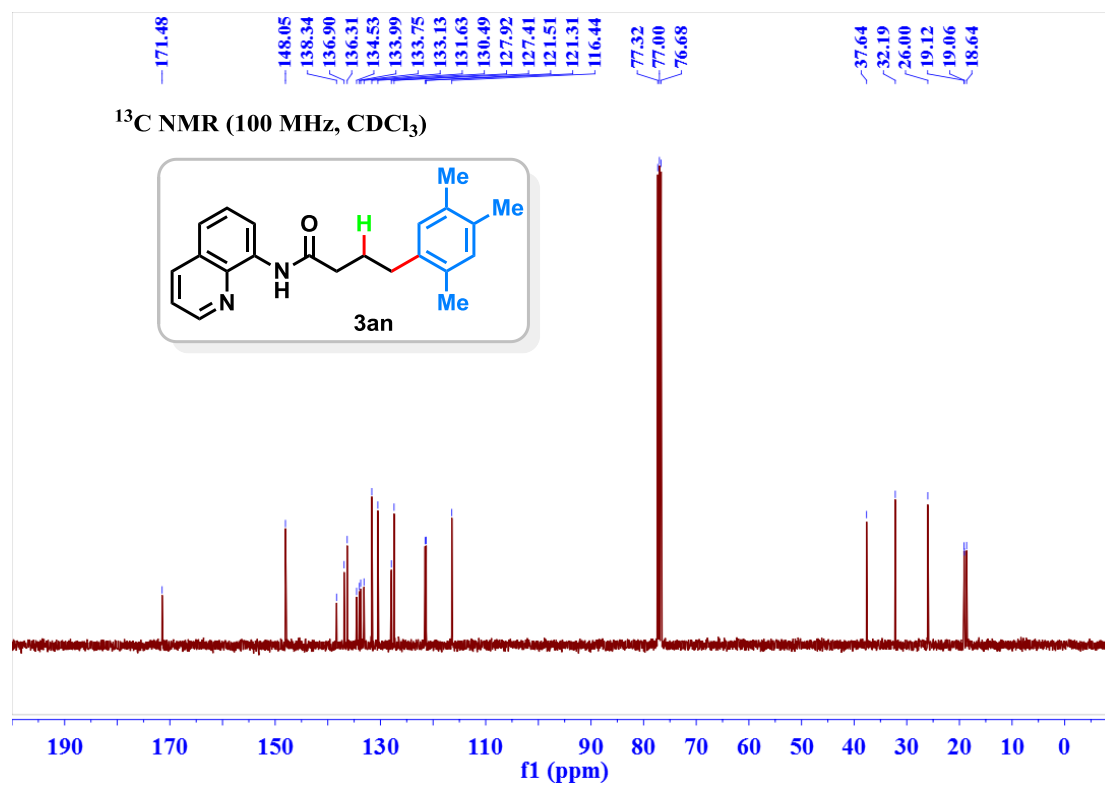

4-(4-methoxy-3,5-dimethylphenyl)-N-(quinolin-8-yl)butanamide (3ao)

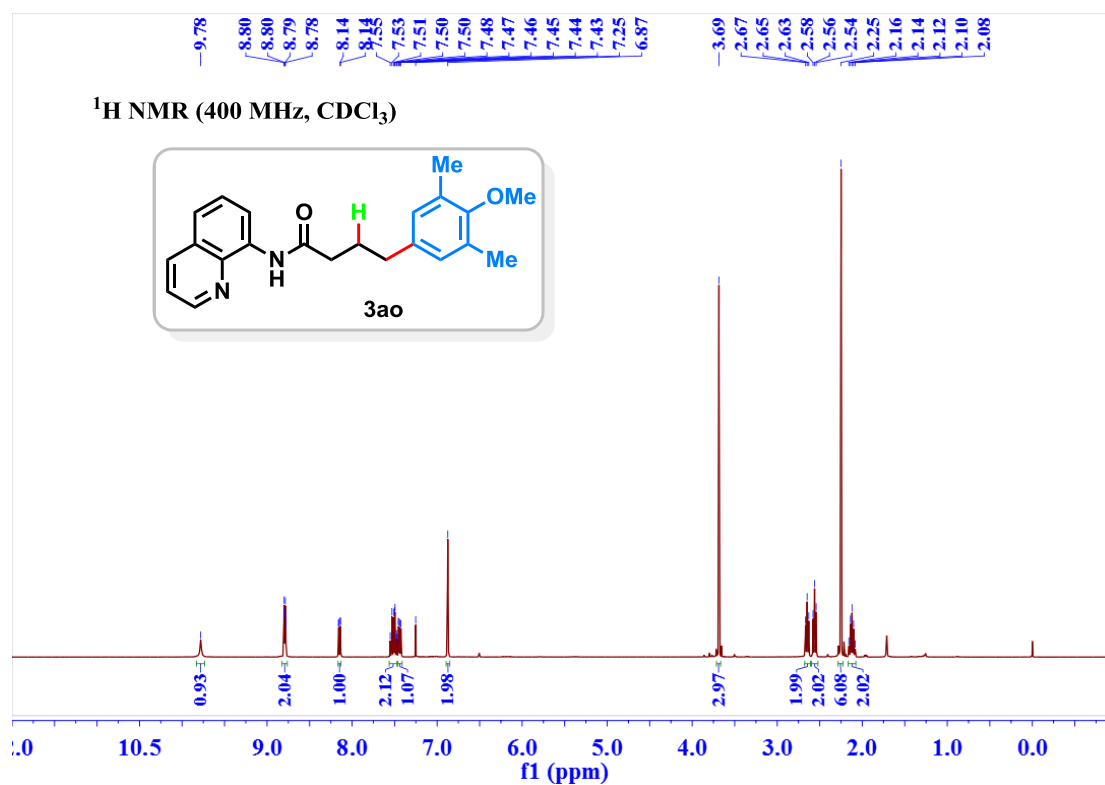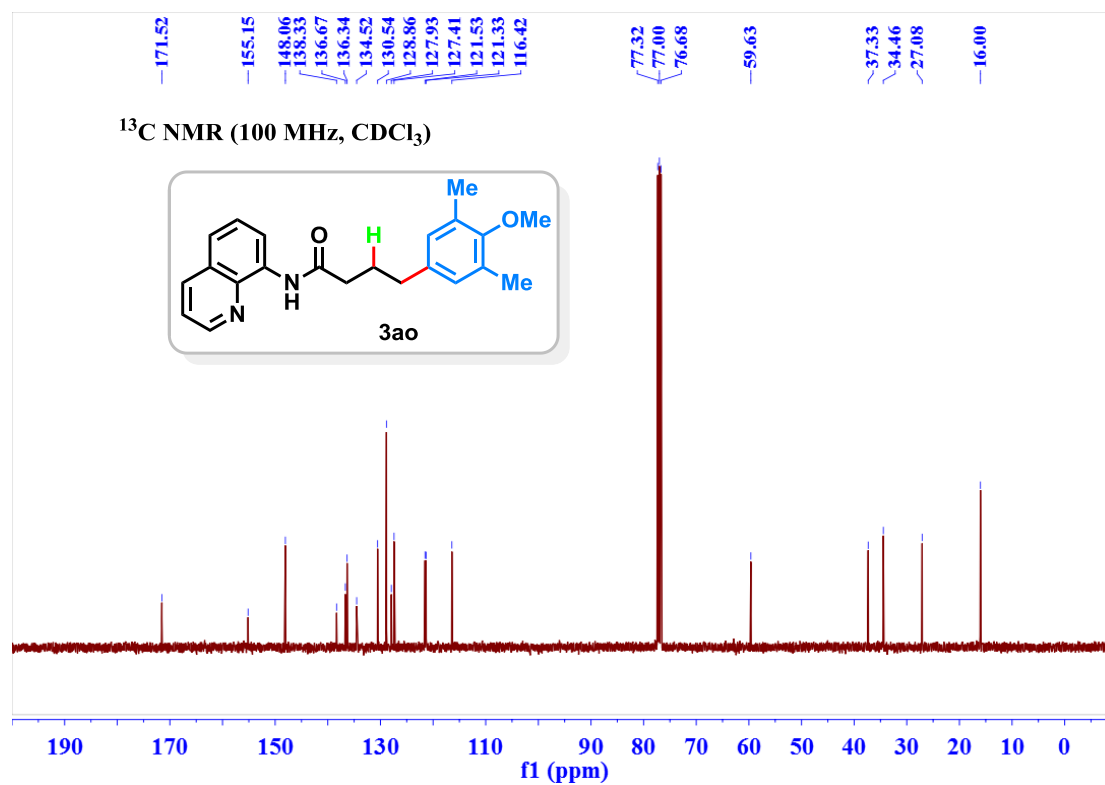

4-mesityl-*N*-(quinolin-8-yl)butanamide (3ap)

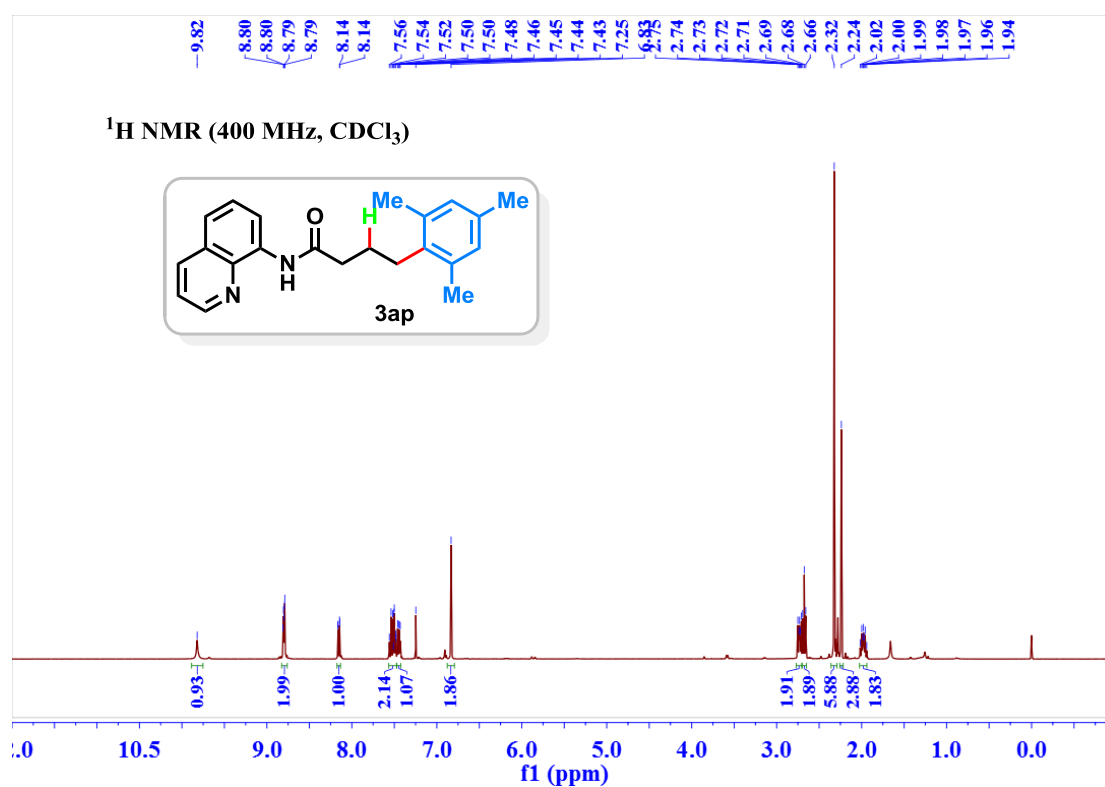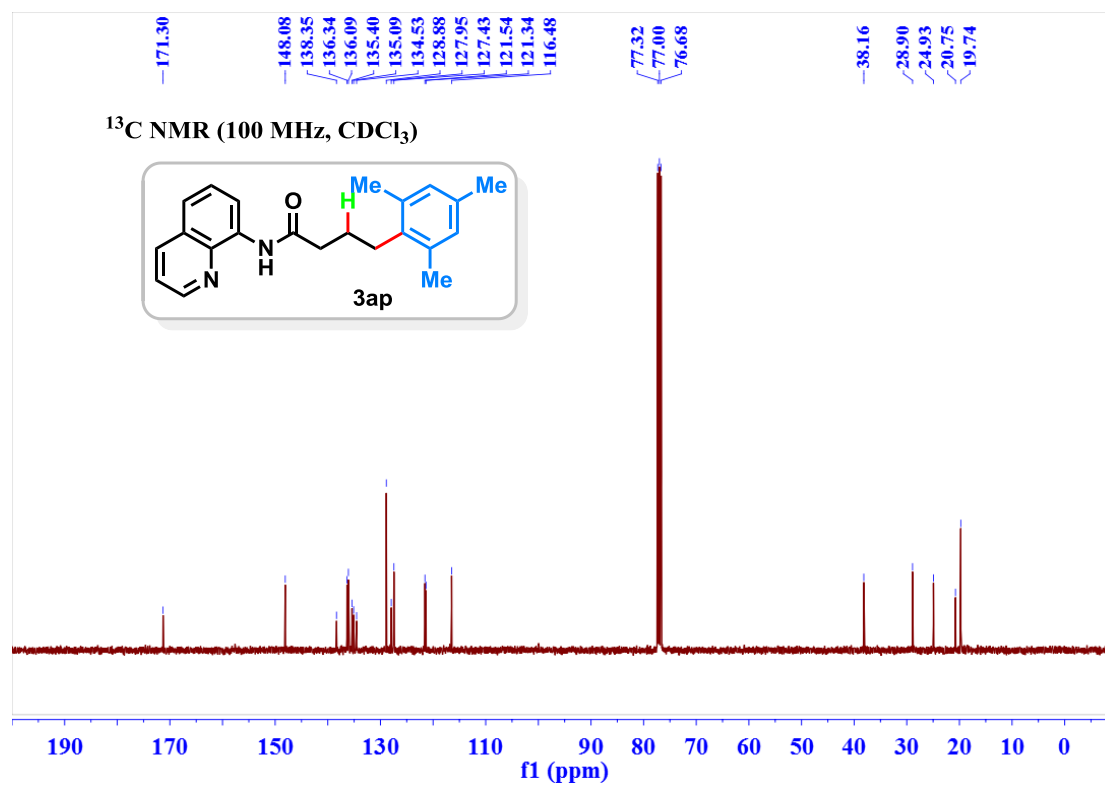



***N*-(quinolin-8-yl)-4-(thiophen-2-yl)butanamide (3aq)**

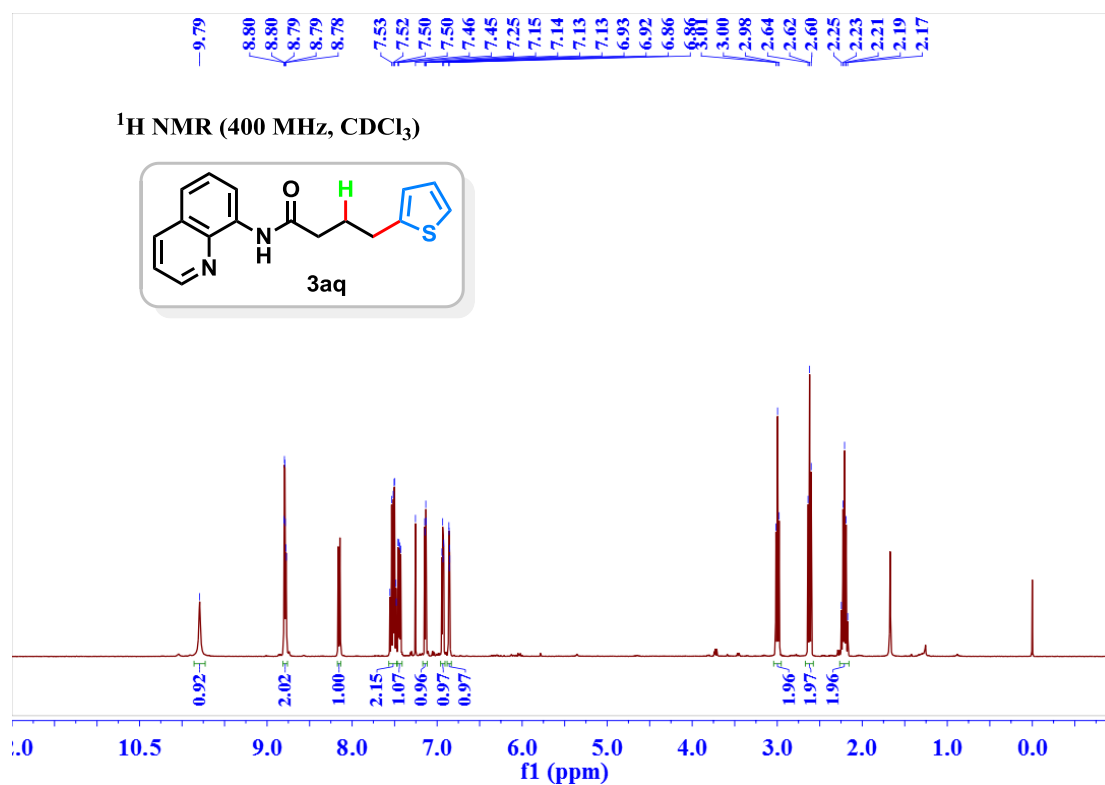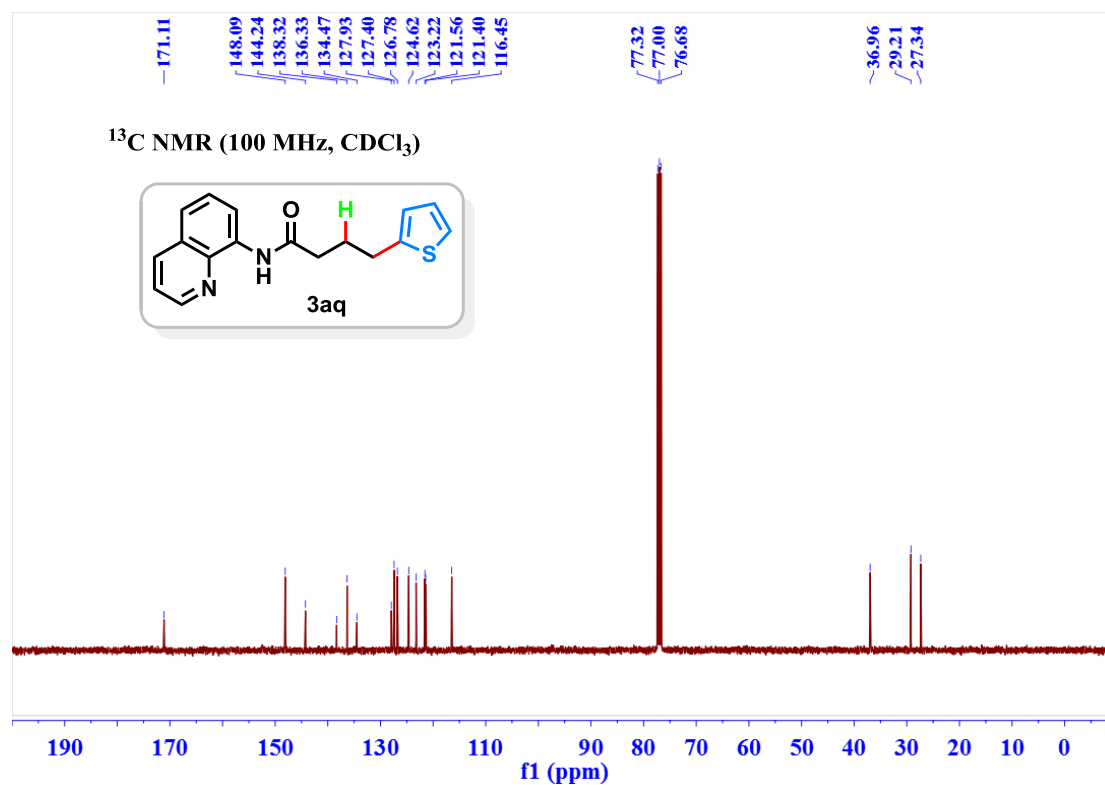

**4-(5-methylthiophen-2-yl)-N-(quinolin-8-yl)butanamide (3ar)**

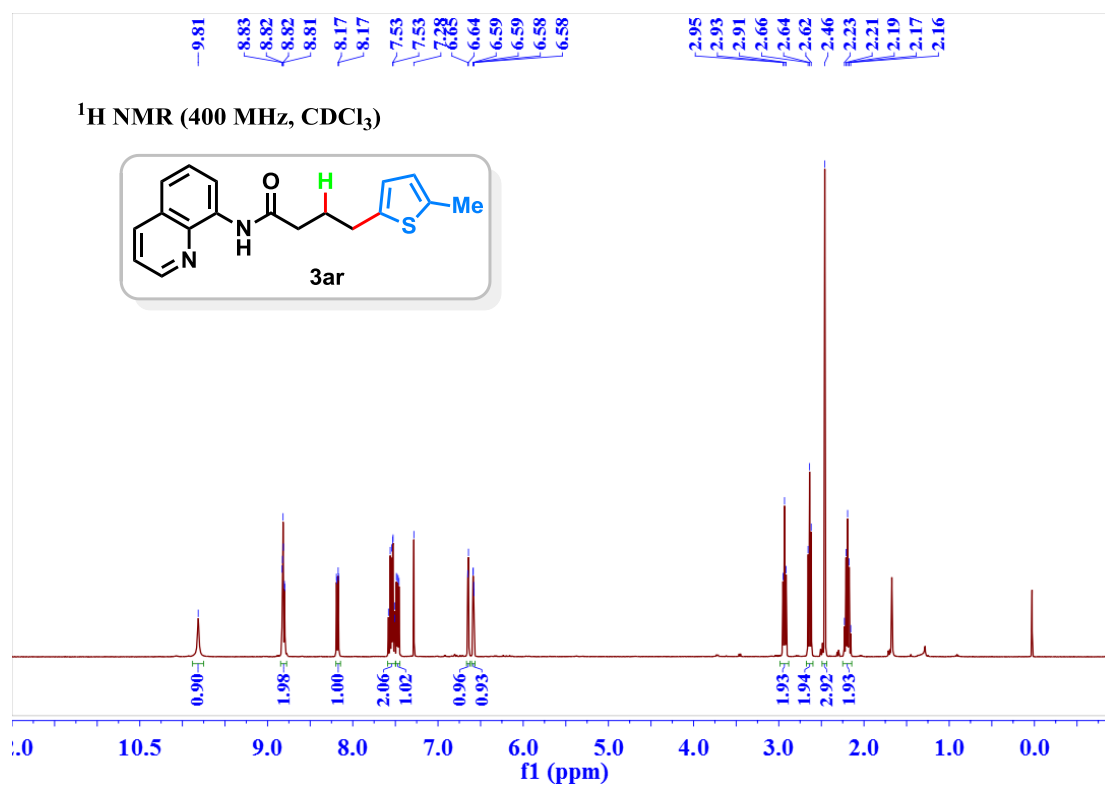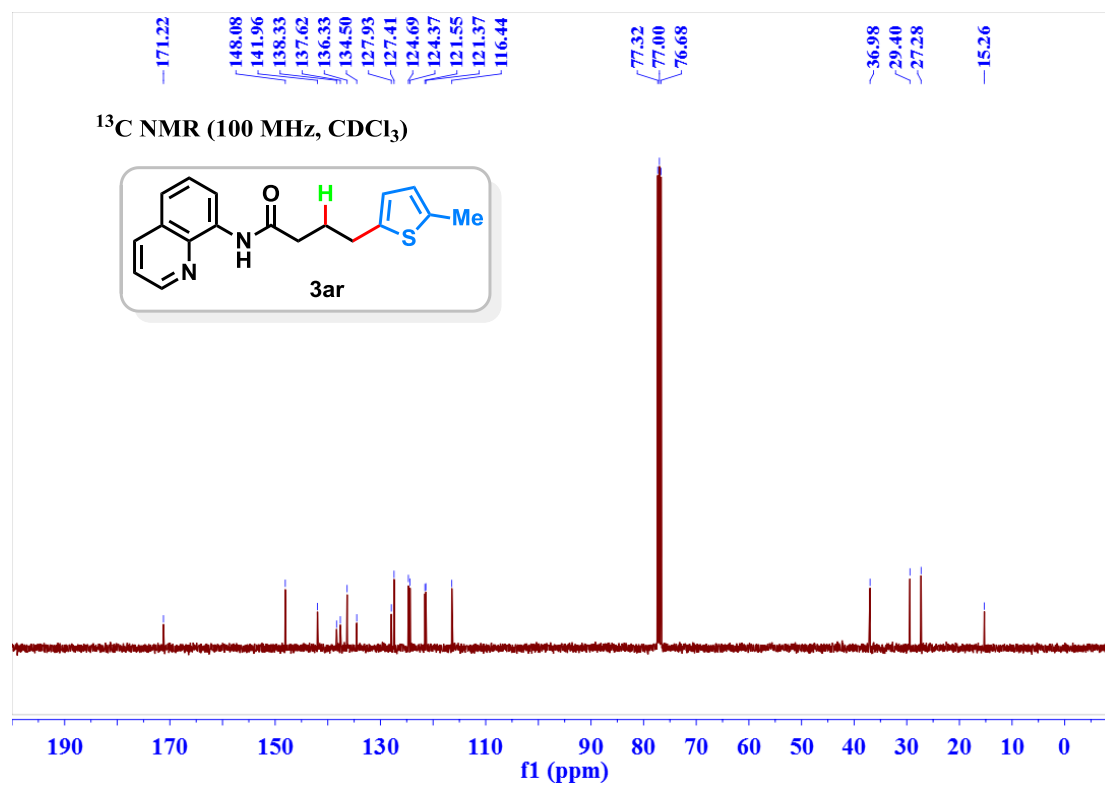

**4-(3-methylthiophen-2-yl)-N-(quinolin-8-yl)butanamide (3as)**

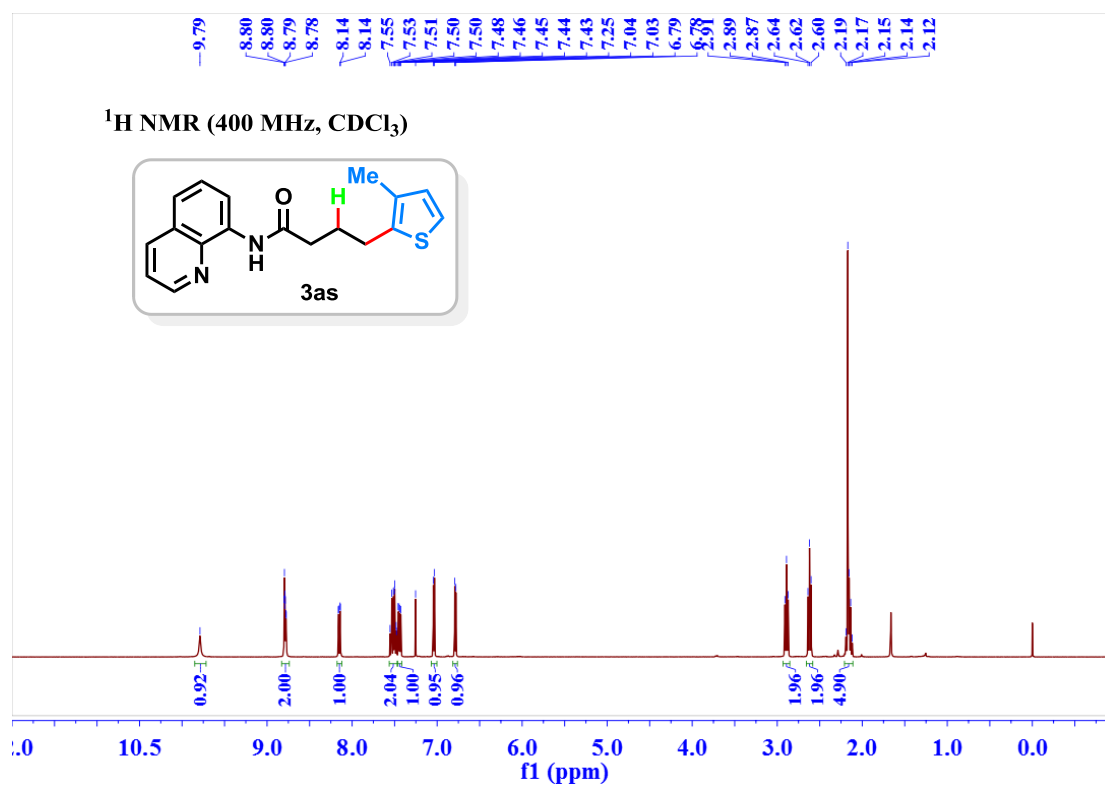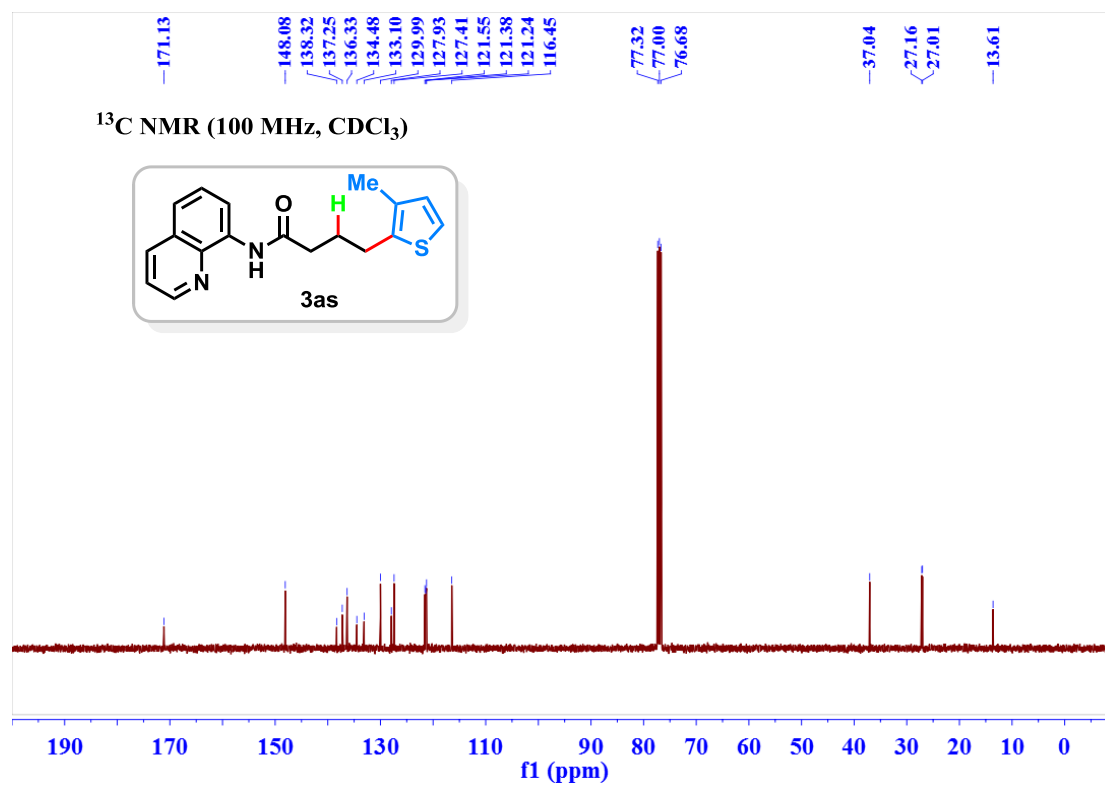

***N*-(quinolin-8-yl)-4-(thiophen-3-yl)butanamide (3at)**

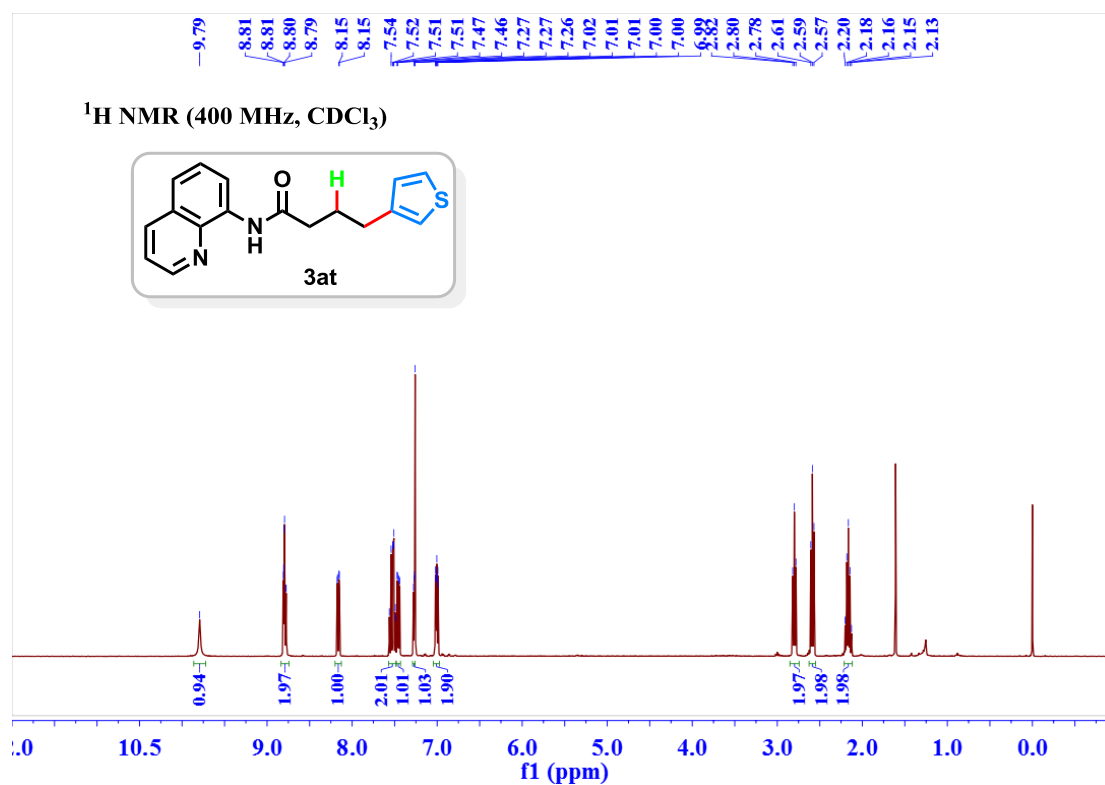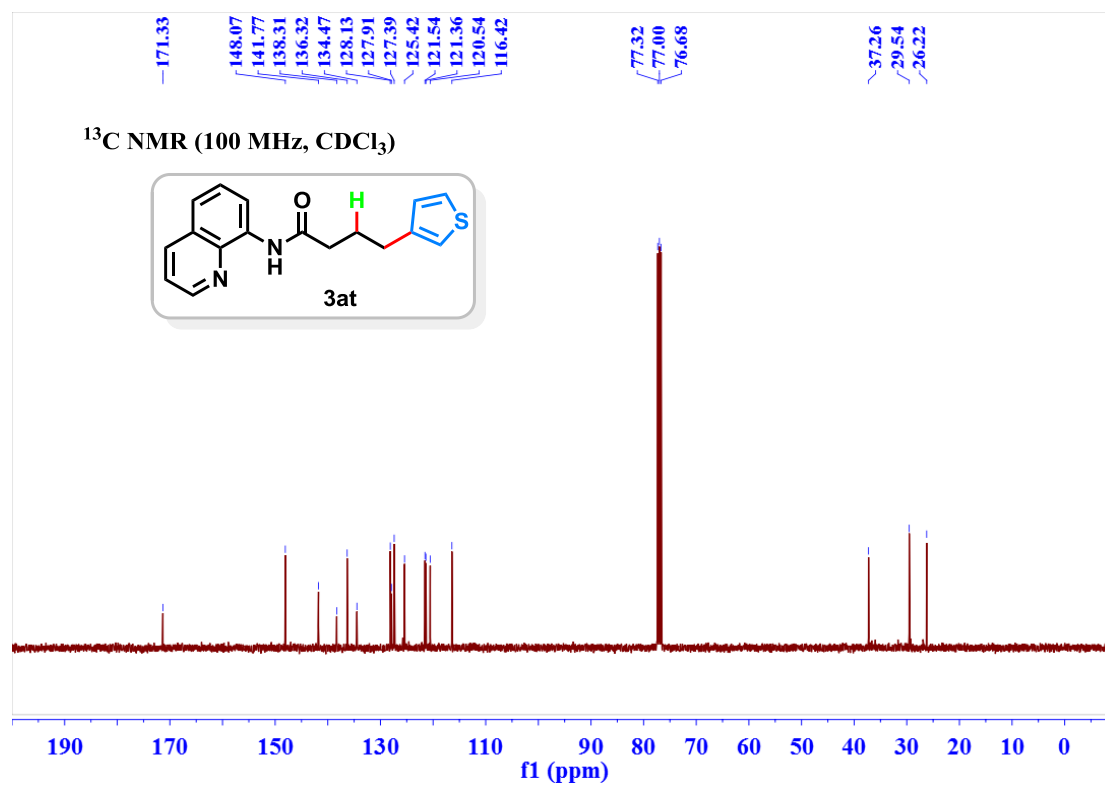

**4-(benzofuran-5-yl)-*N*-(quinolin-8-yl)butanamide (3au)**

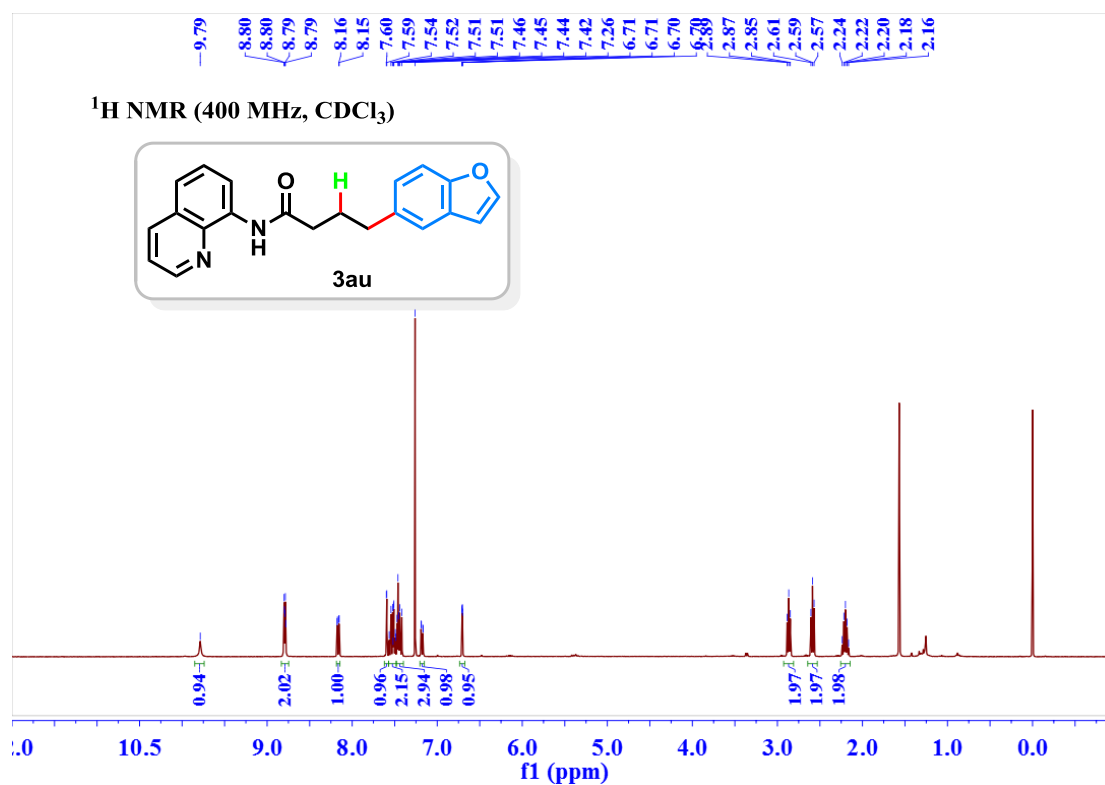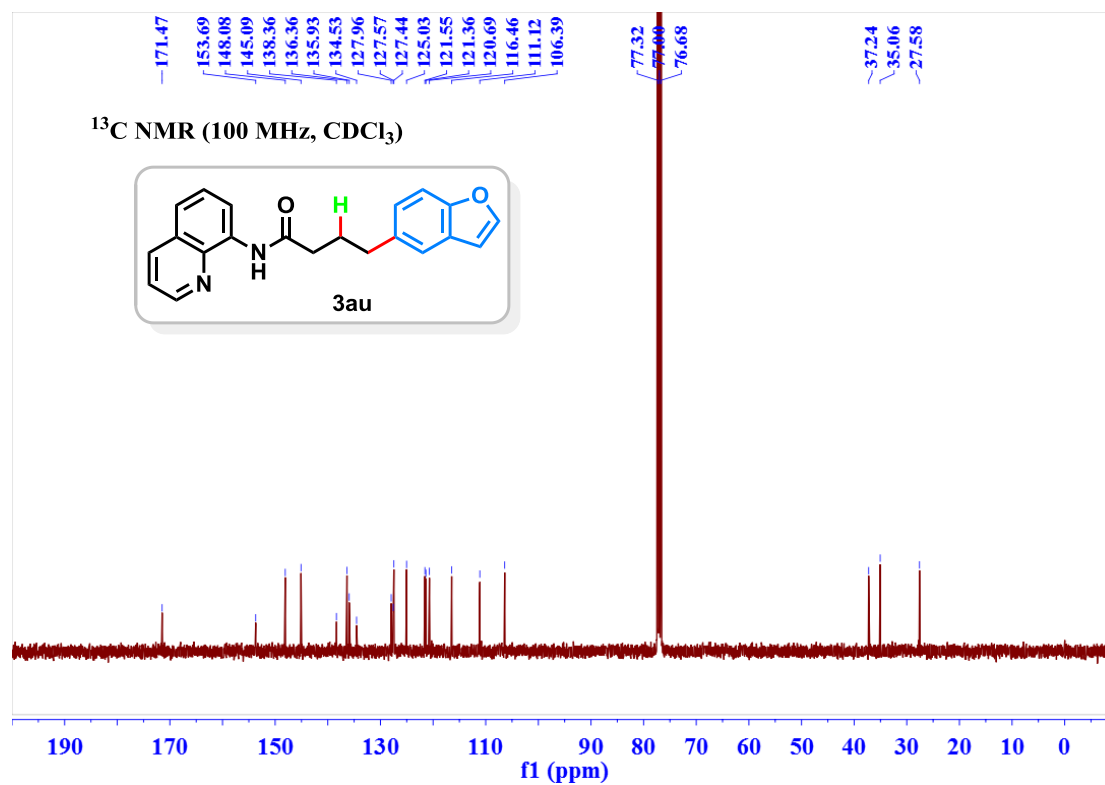

4-(benzo[*b*]thiophen-5-yl)-*N*-(quinolin-8-yl)butanamide (3av)

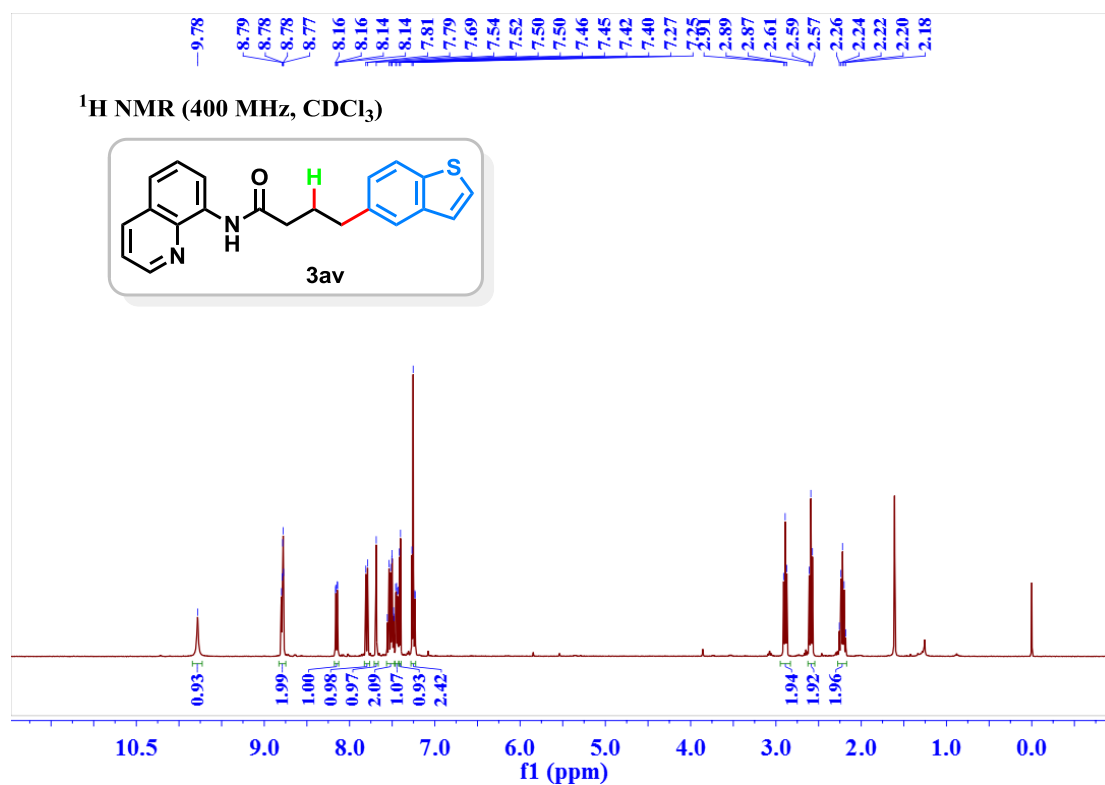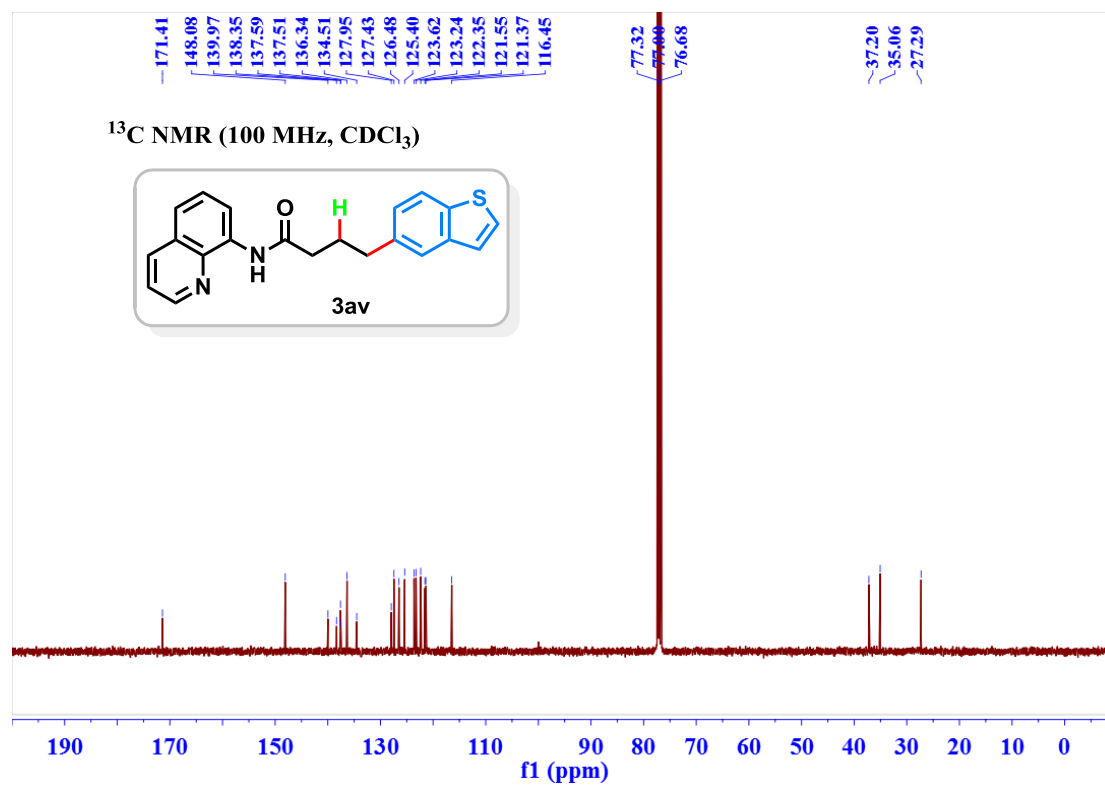

**2-methyl-4-phenyl-*N*-(quinolin-8-yl)butanamide (4b)**

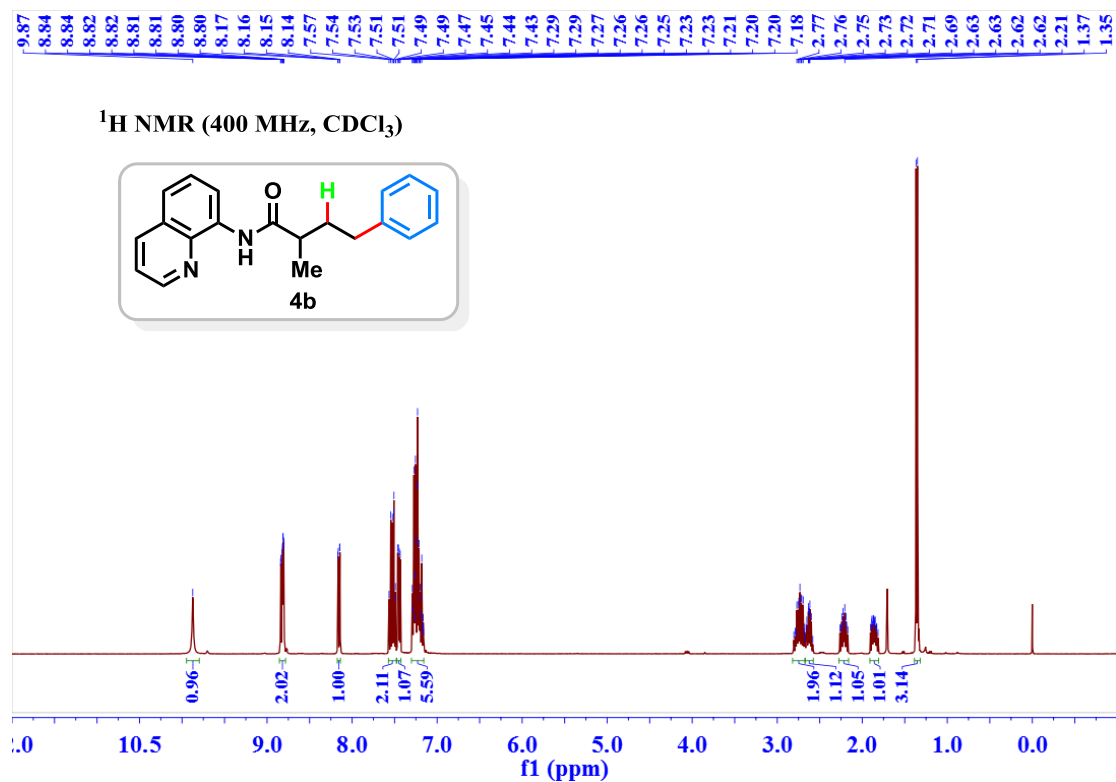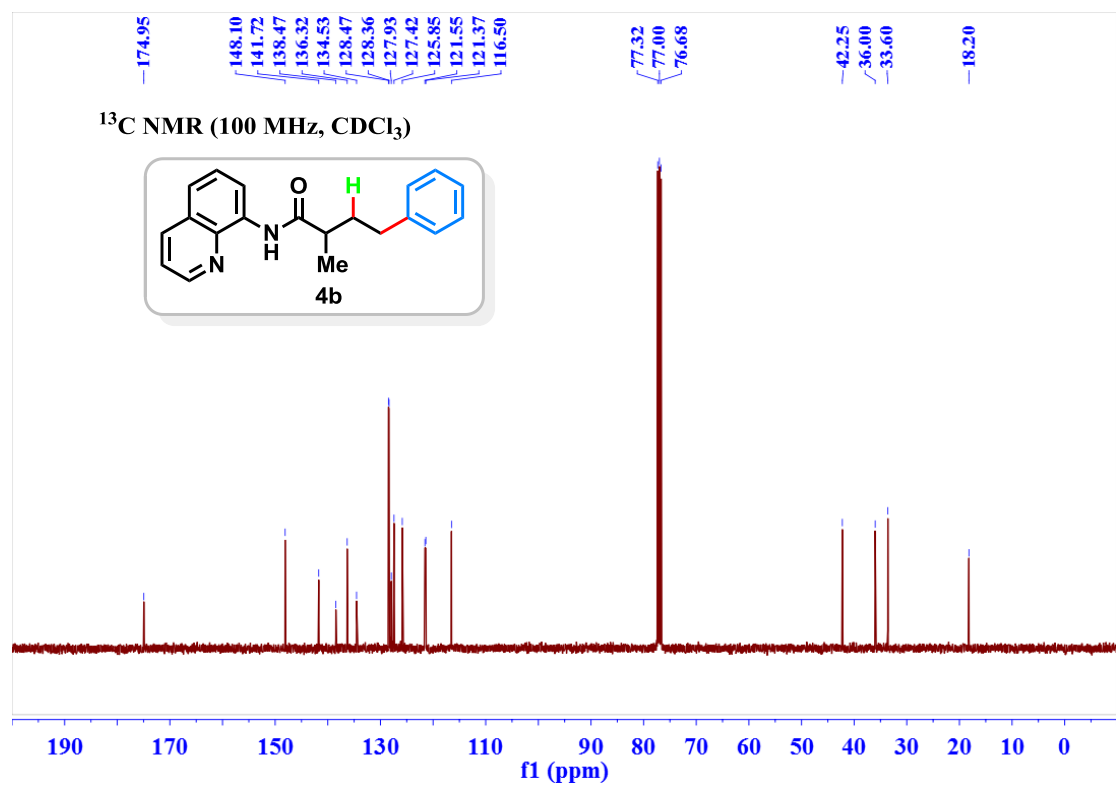

2-phenethyl-4-phenyl-*N*-(quinolin-8-yl)butanamide (4c)

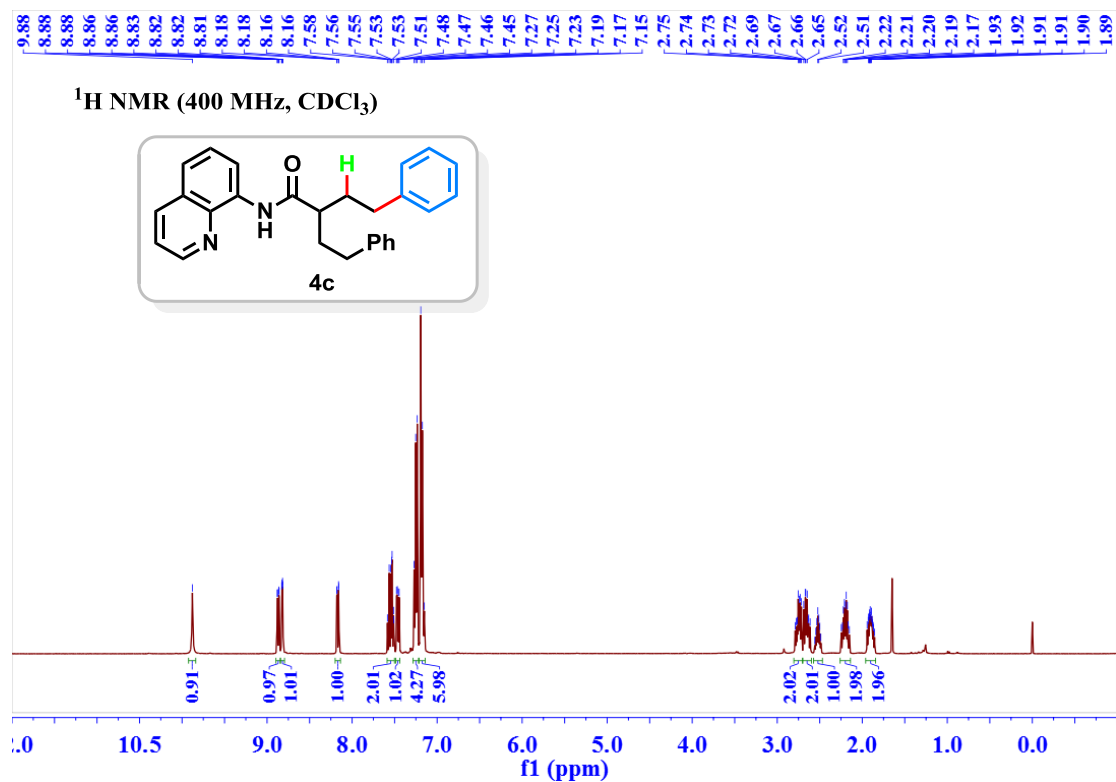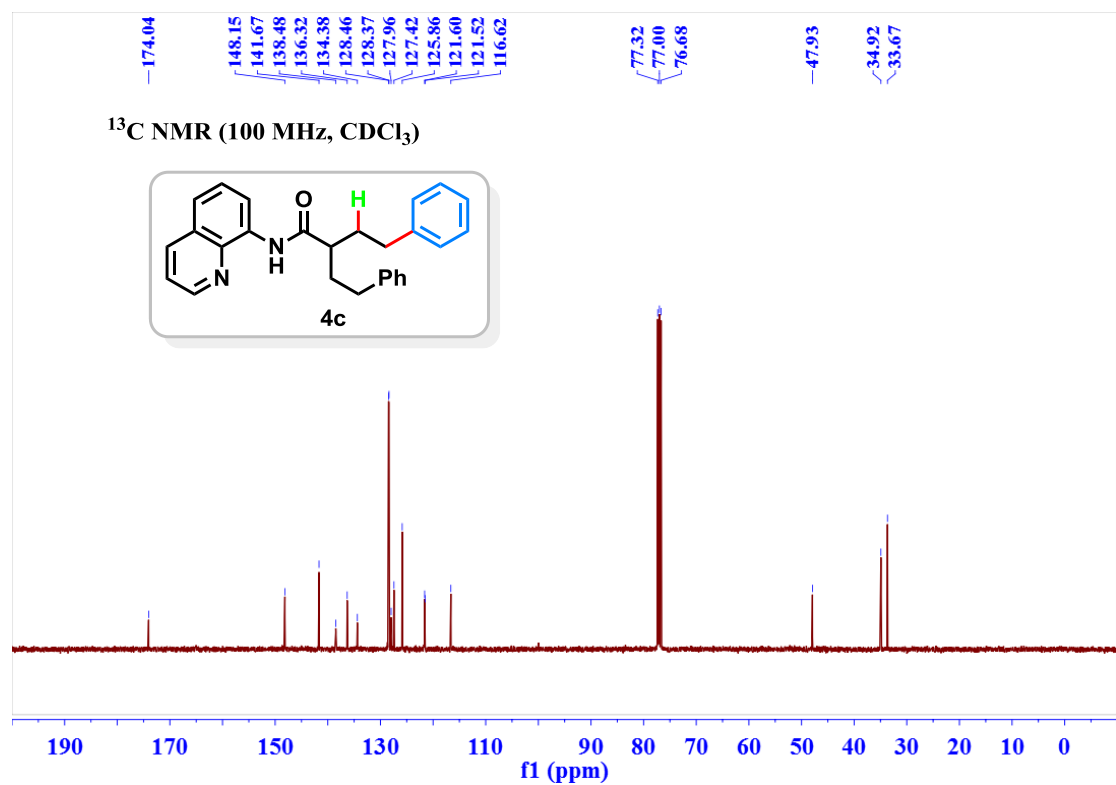



**5-methoxy-2-phenethyl-N-(quinolin-8-yl)pentanamide (4d)**

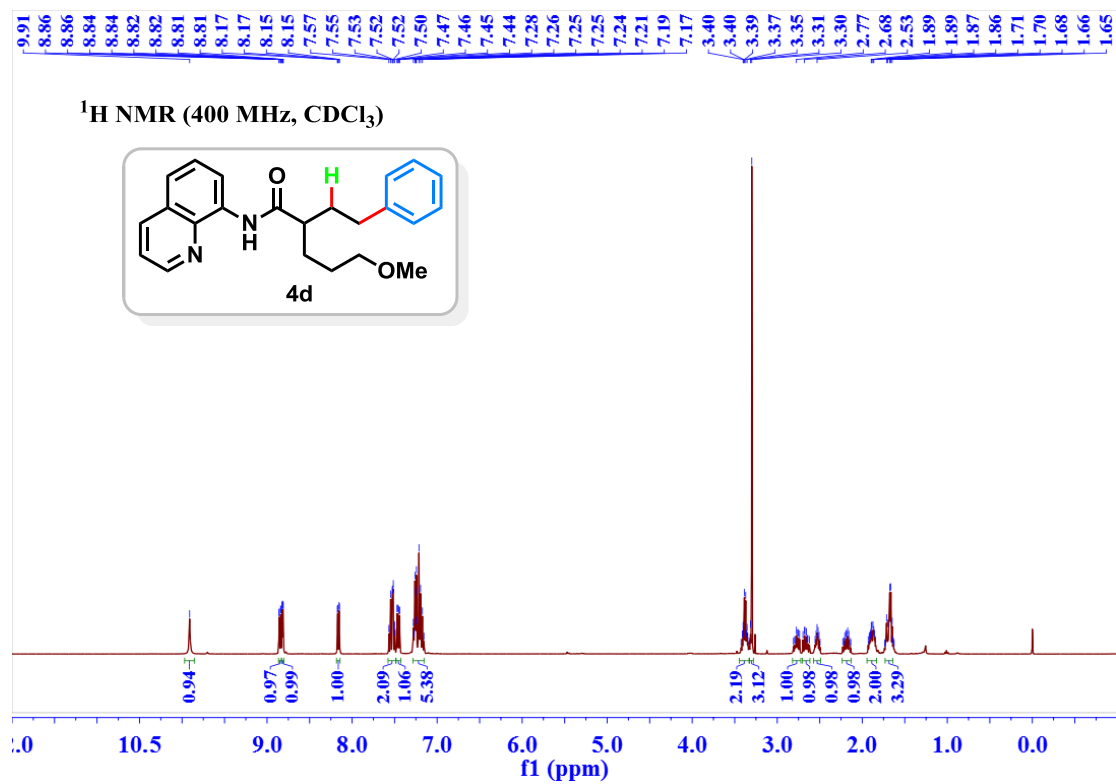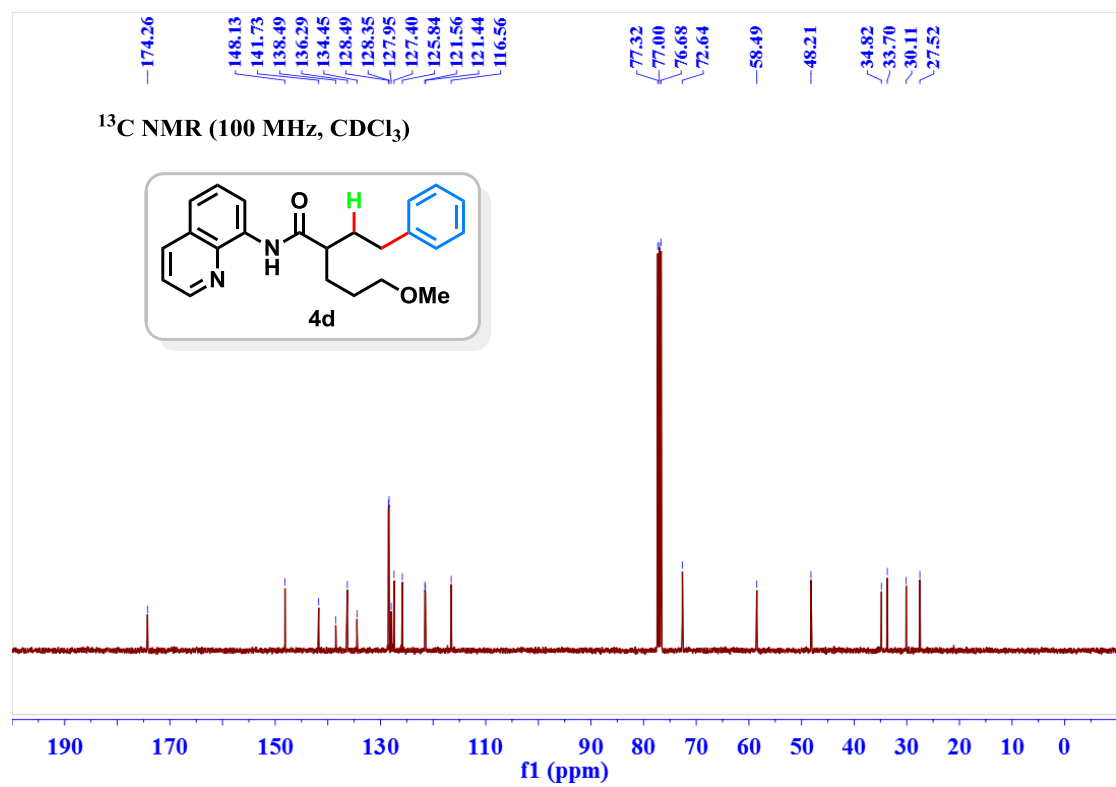

### 3-methyl-4-phenyl-*N*-(quinolin-8-yl)butanamide (4e)

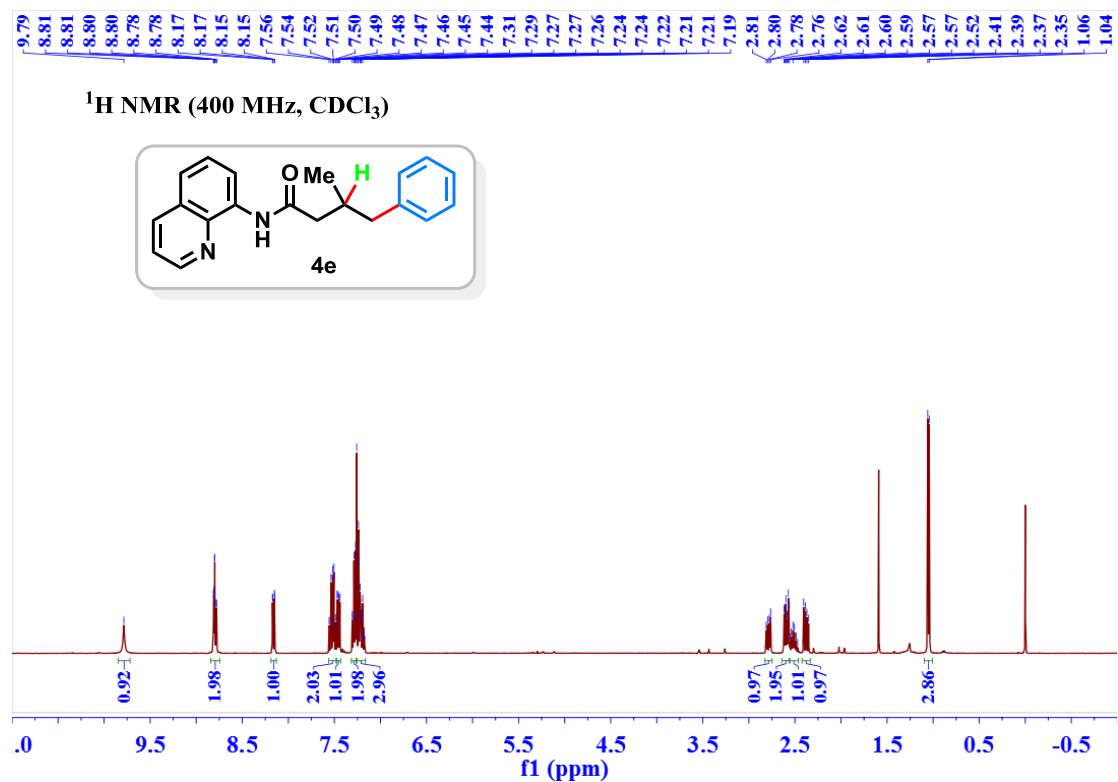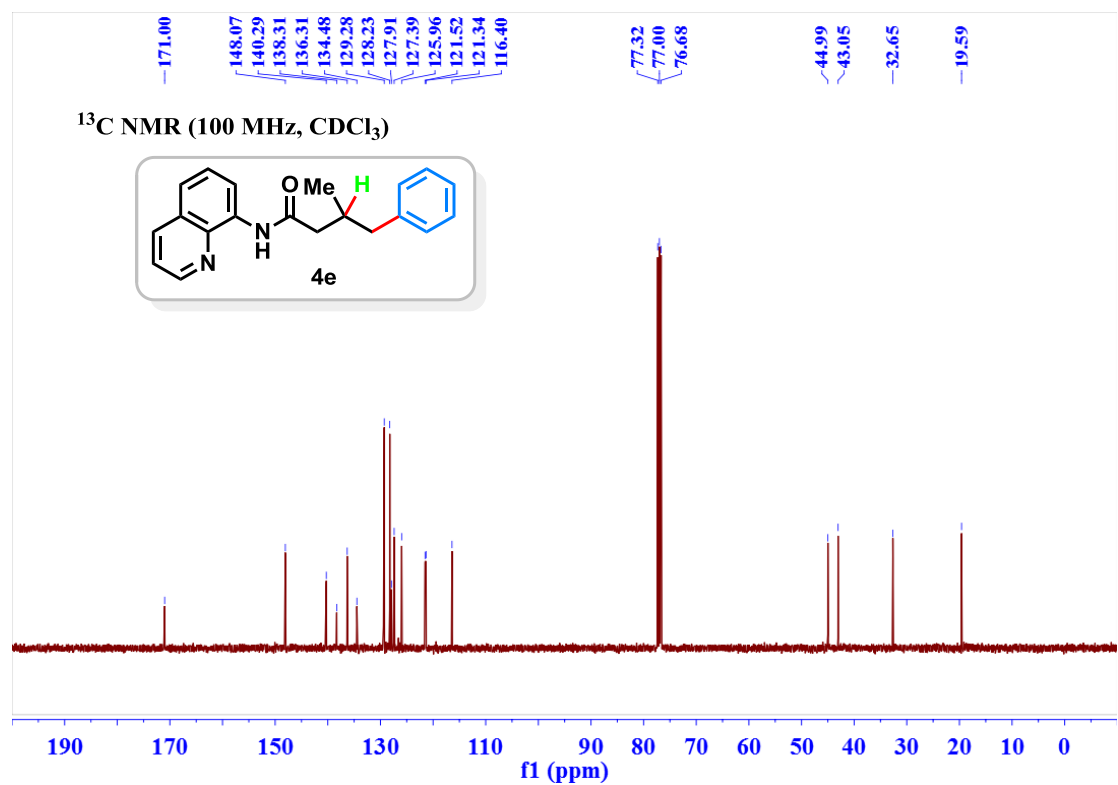

**4-phenyl-N-(quinolin-8-yl)pentanamide (4f)**

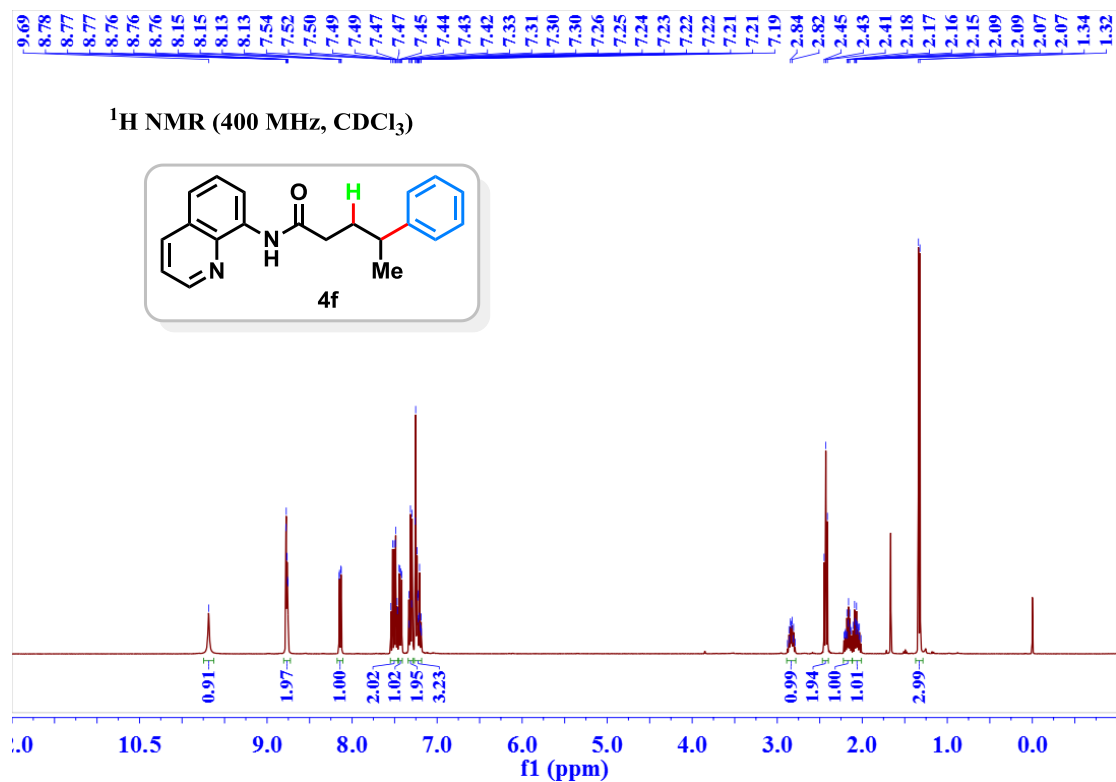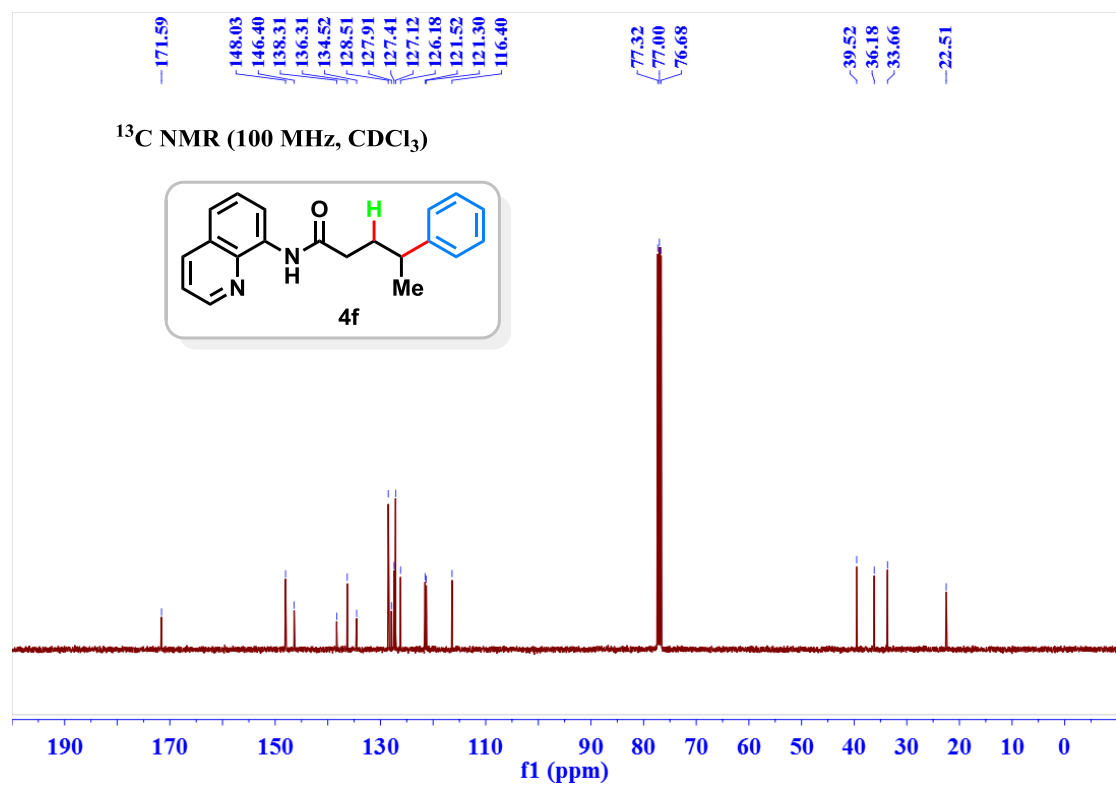

**4-phenyl-*N*-(quinolin-8-yl)hexanamide (4g)**

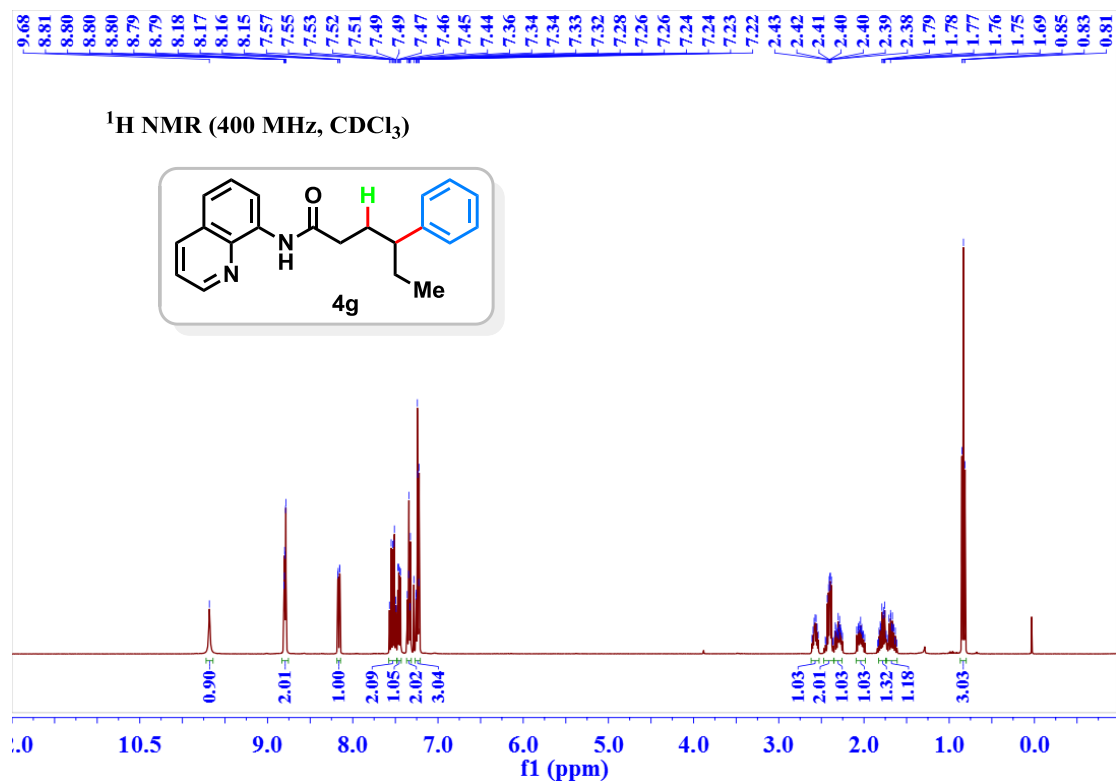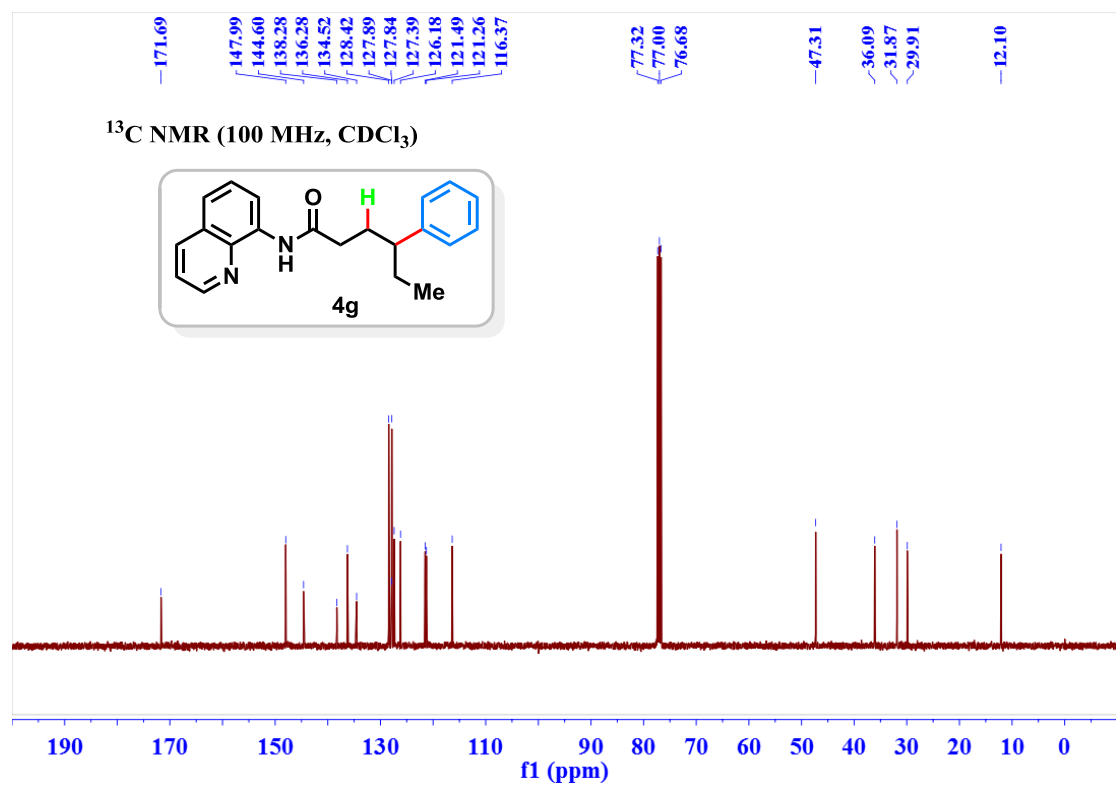

# 4-phenyl-*N*-(quinolin-8-yl)heptanamide (4h)

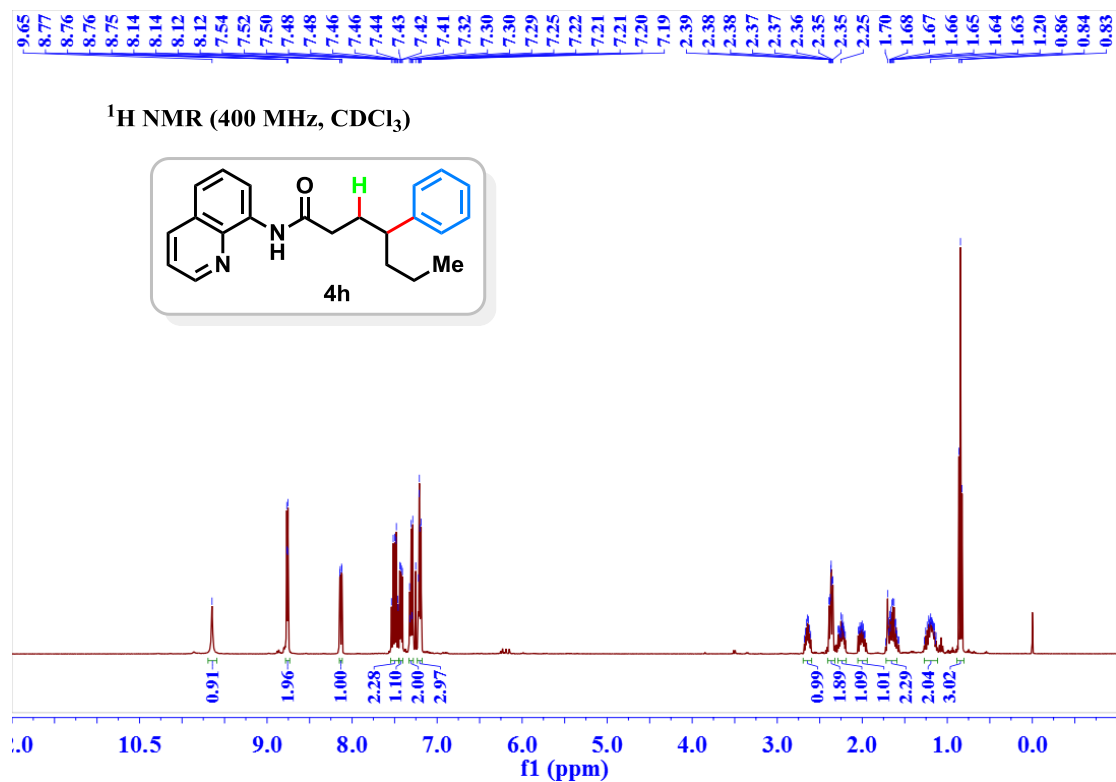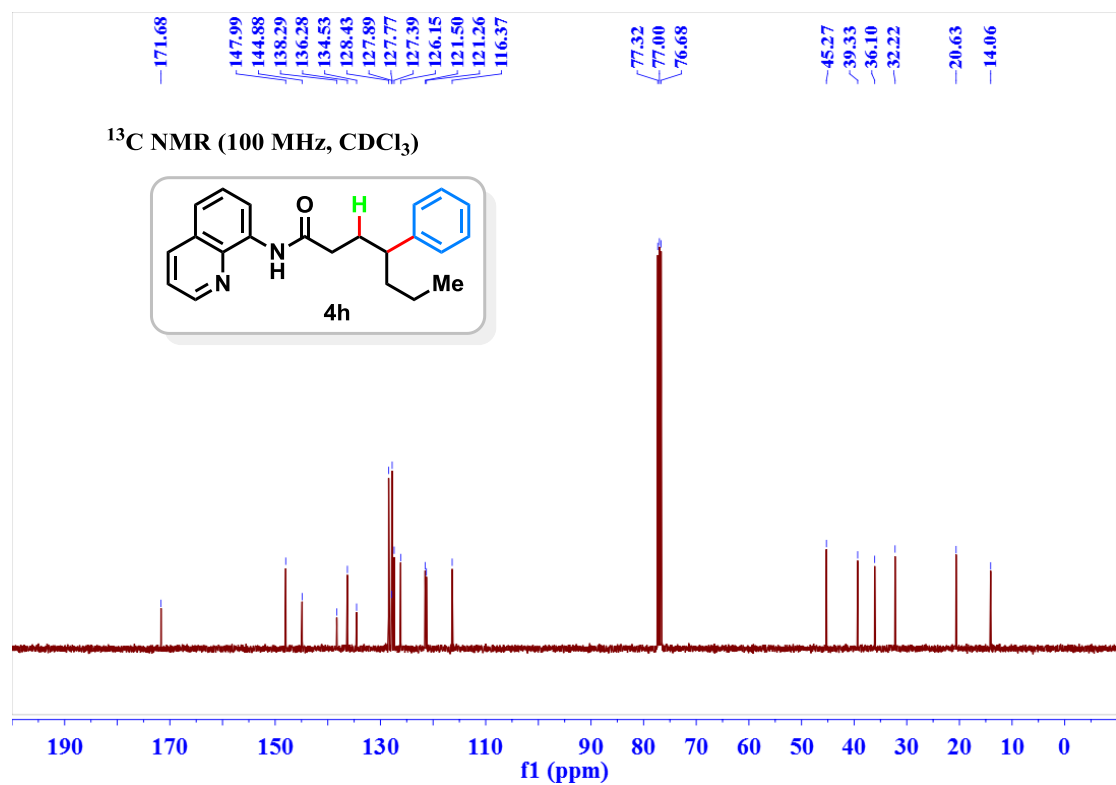

**5,5-dimethyl-4-phenyl-N-(quinolin-8-yl)hexanamide (4i)**

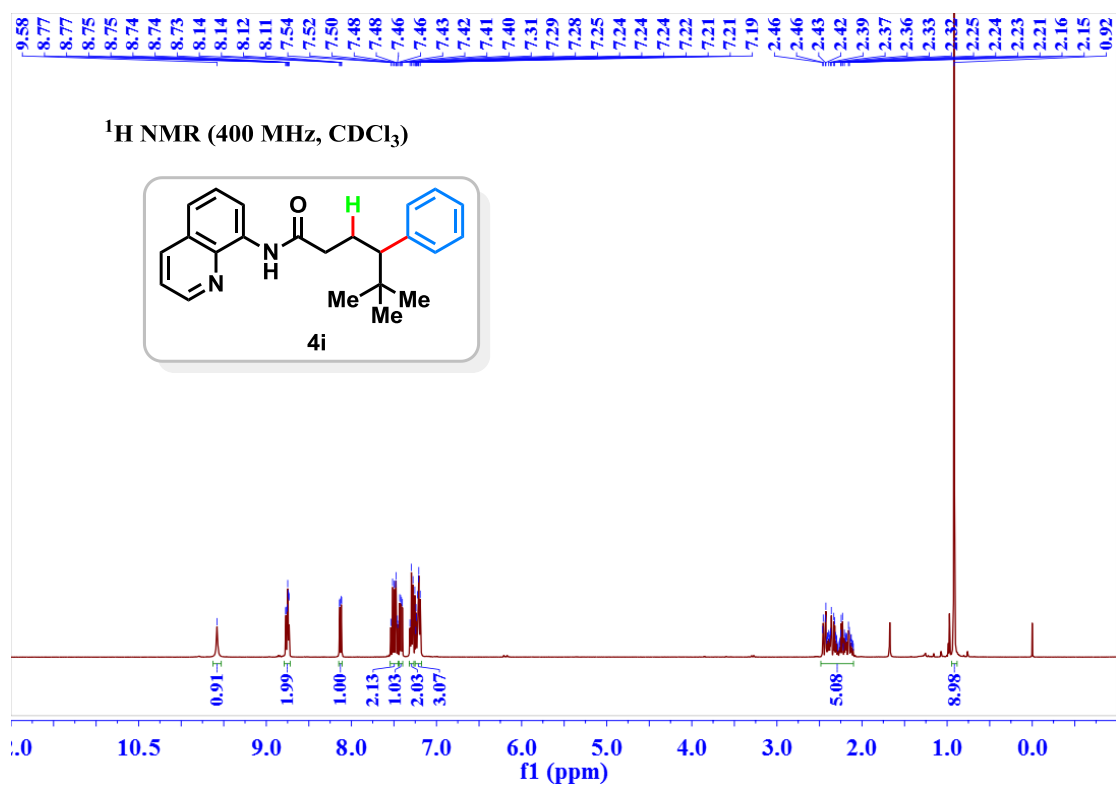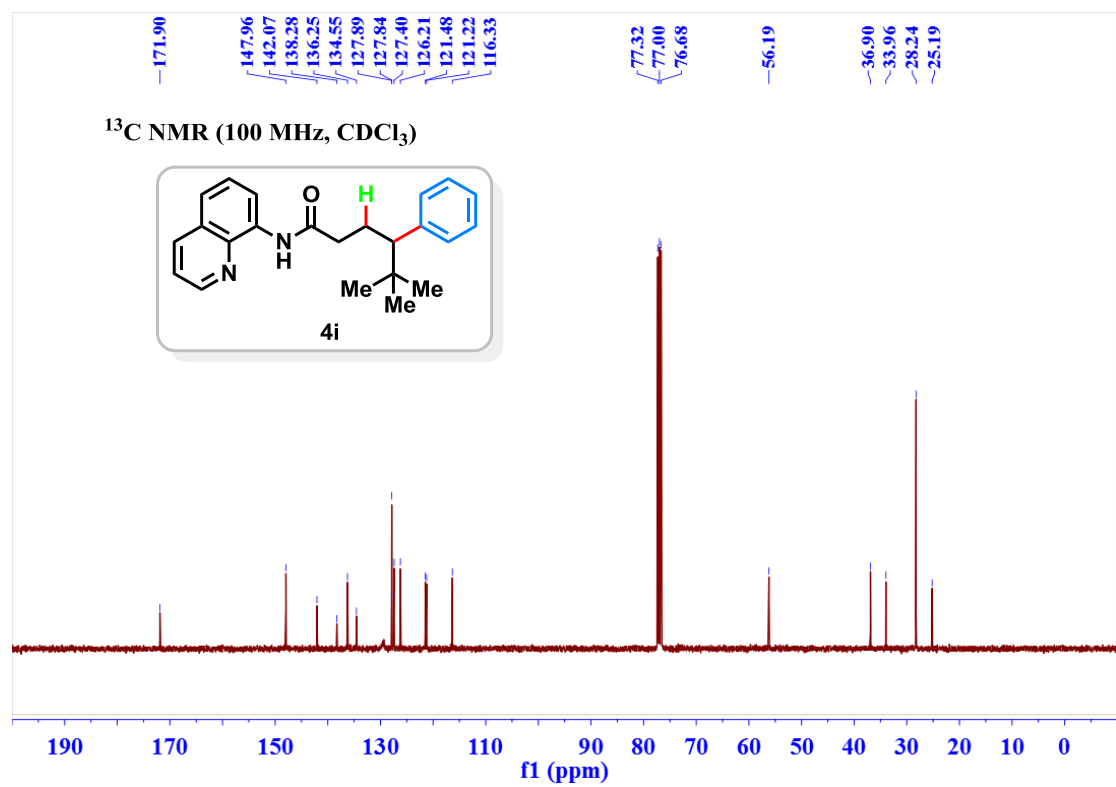

**4-phenyl-*N*-(quinolin-8-yl)octanamide (4j)**

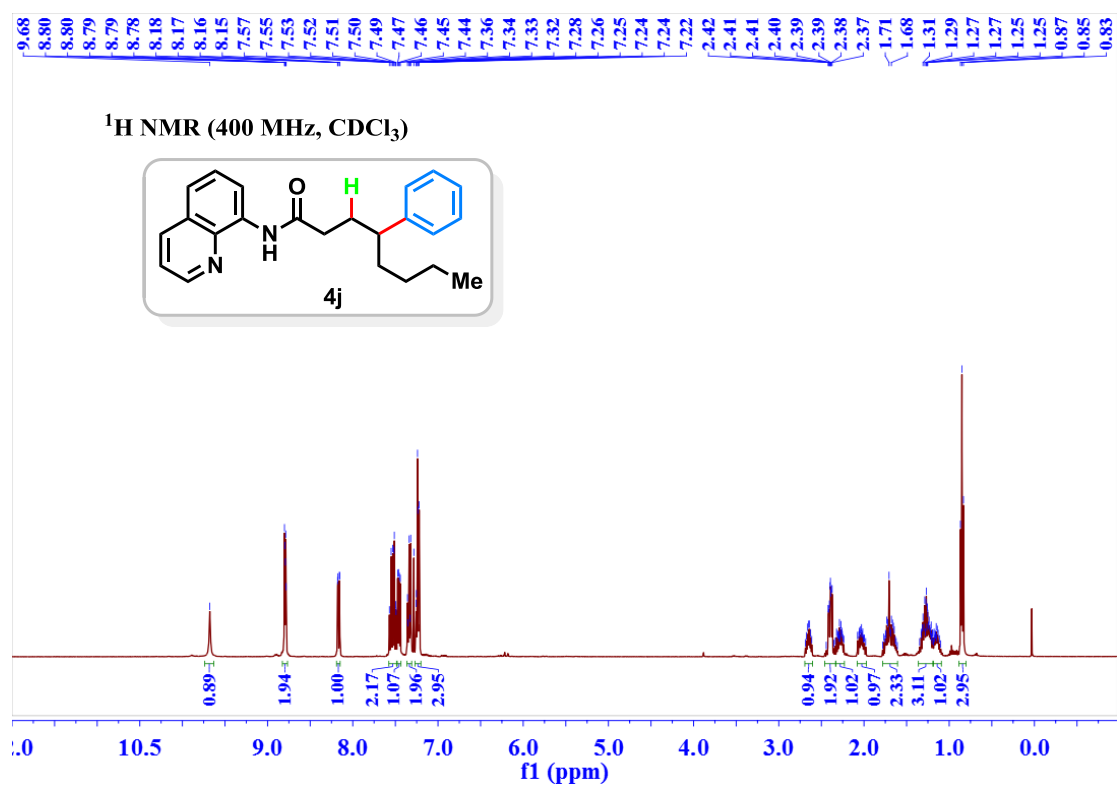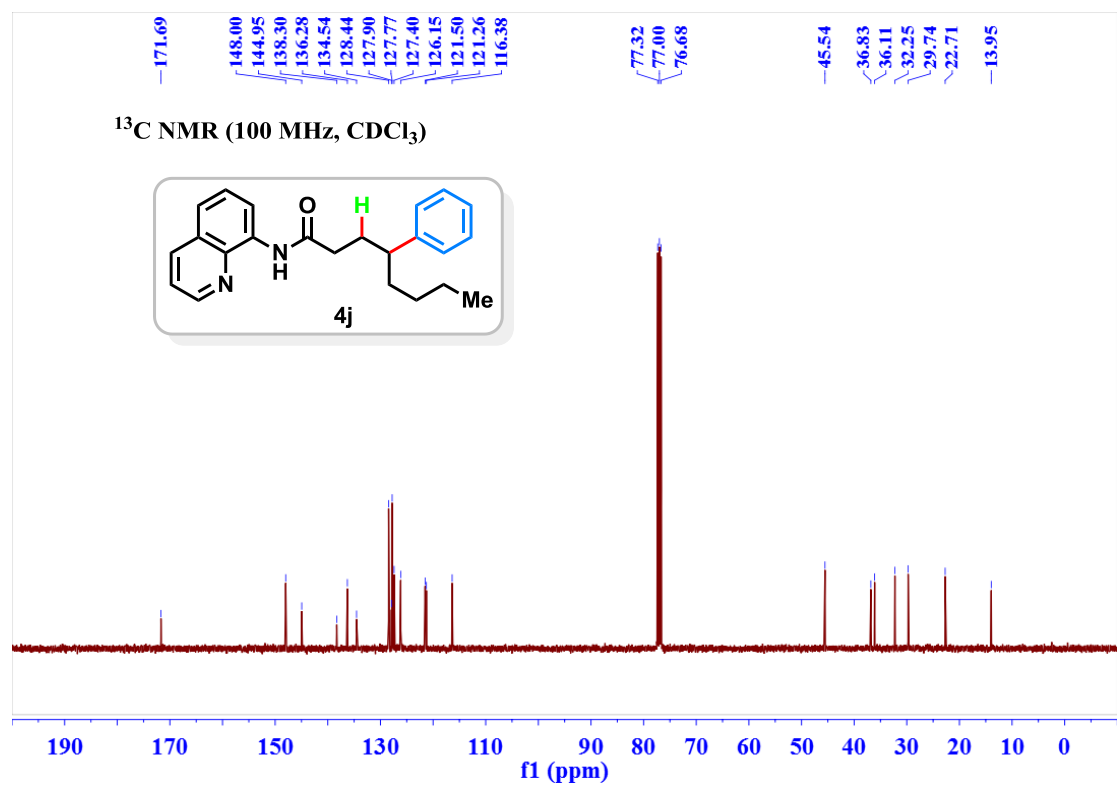

**7-chloro-4-phenyl-N-(quinolin-8-yl)heptanamide (4k)**

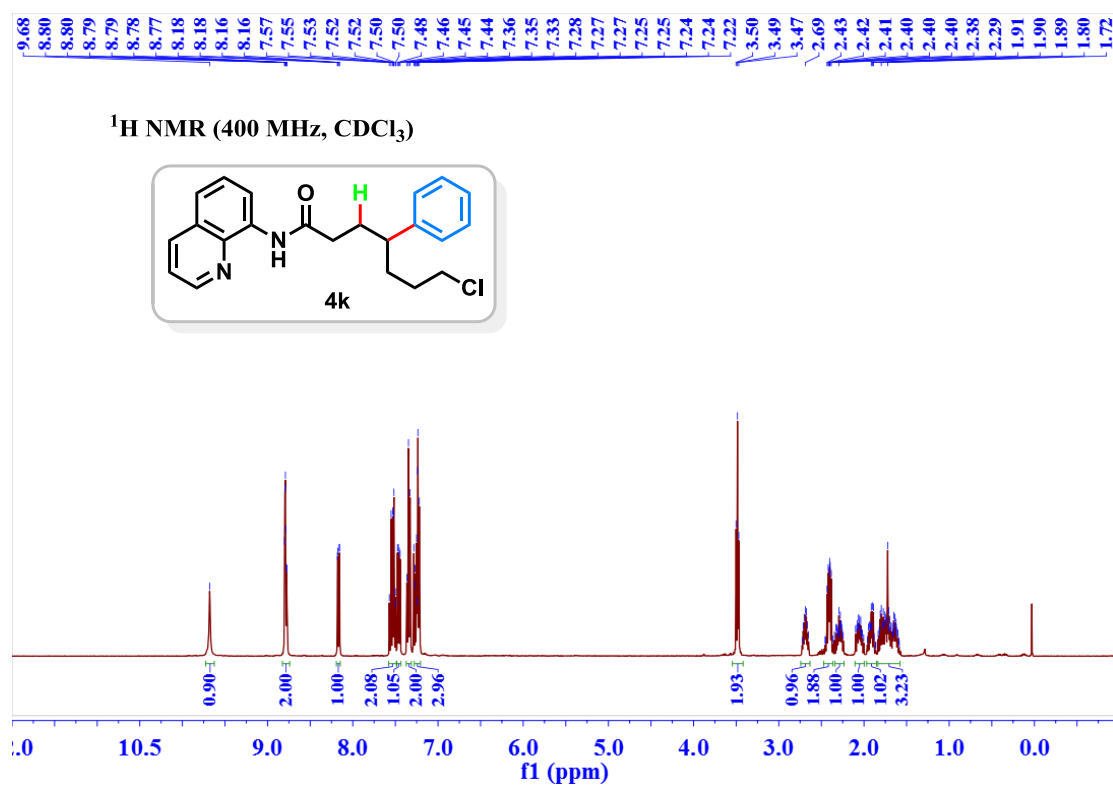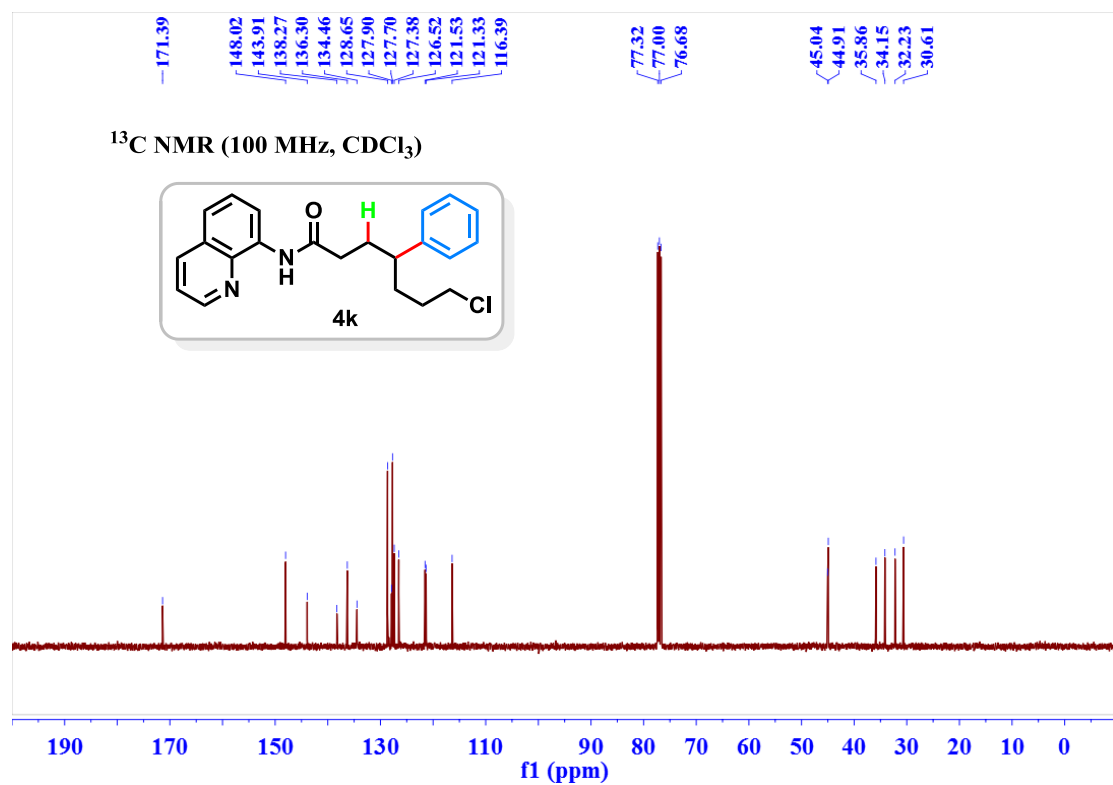



**4-phenyl-*N*-(quinolin-8-yl)non-8-enamide (4I)**

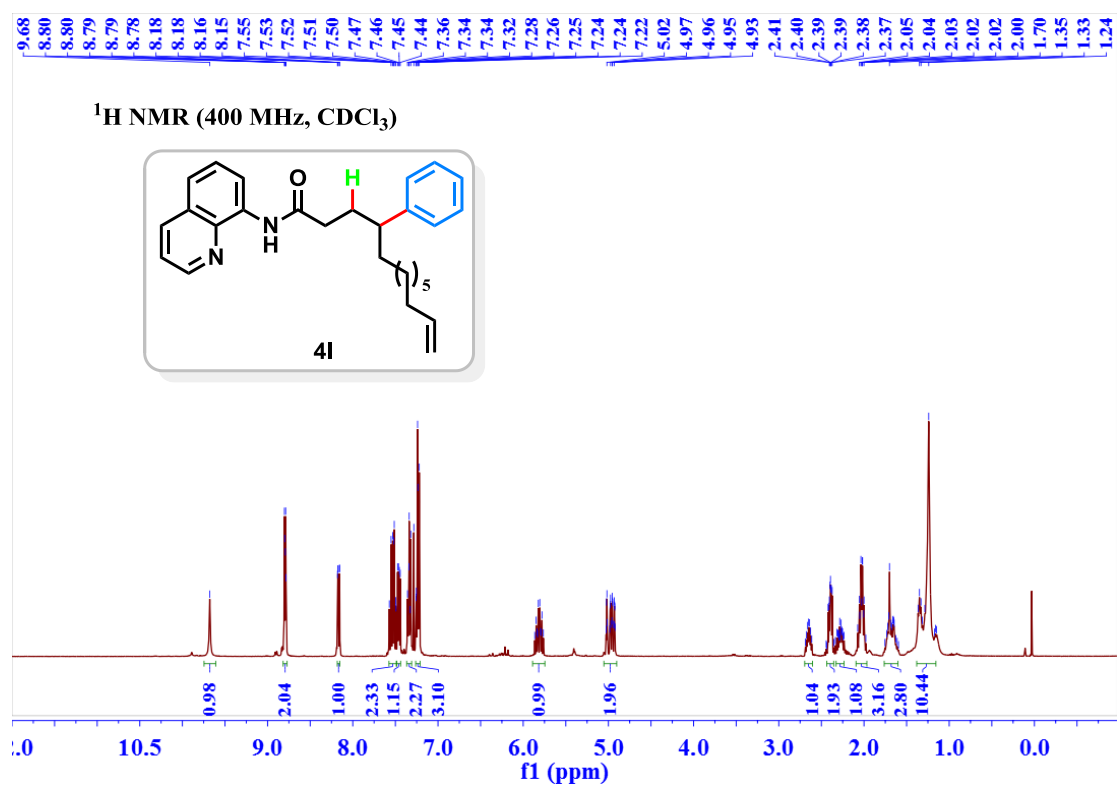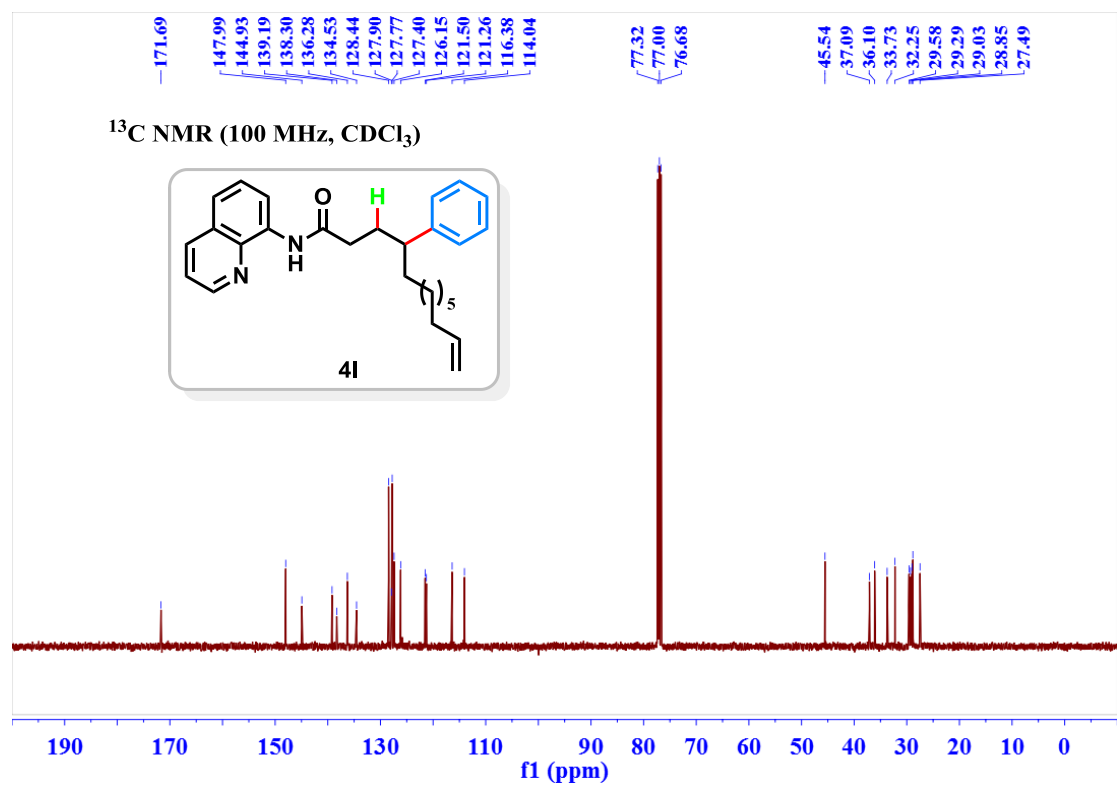

**5,9-dimethyl-4-phenyl-N-(quinolin-8-yl)dec-8-enamide (4m)**

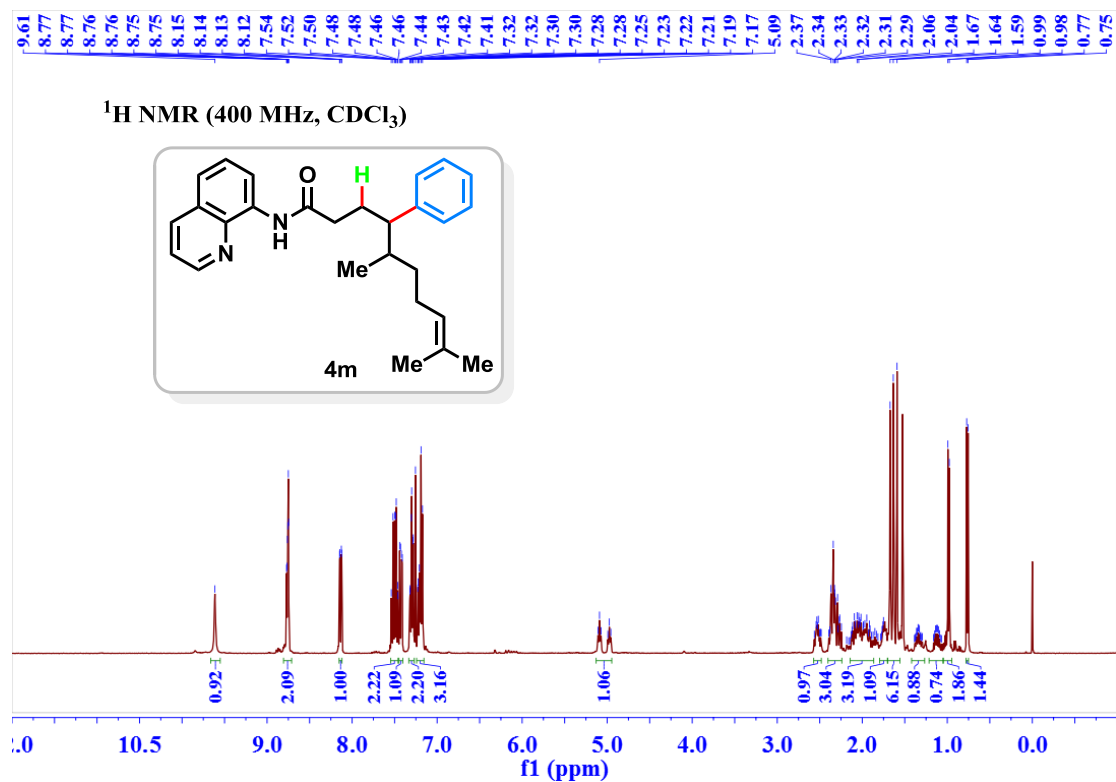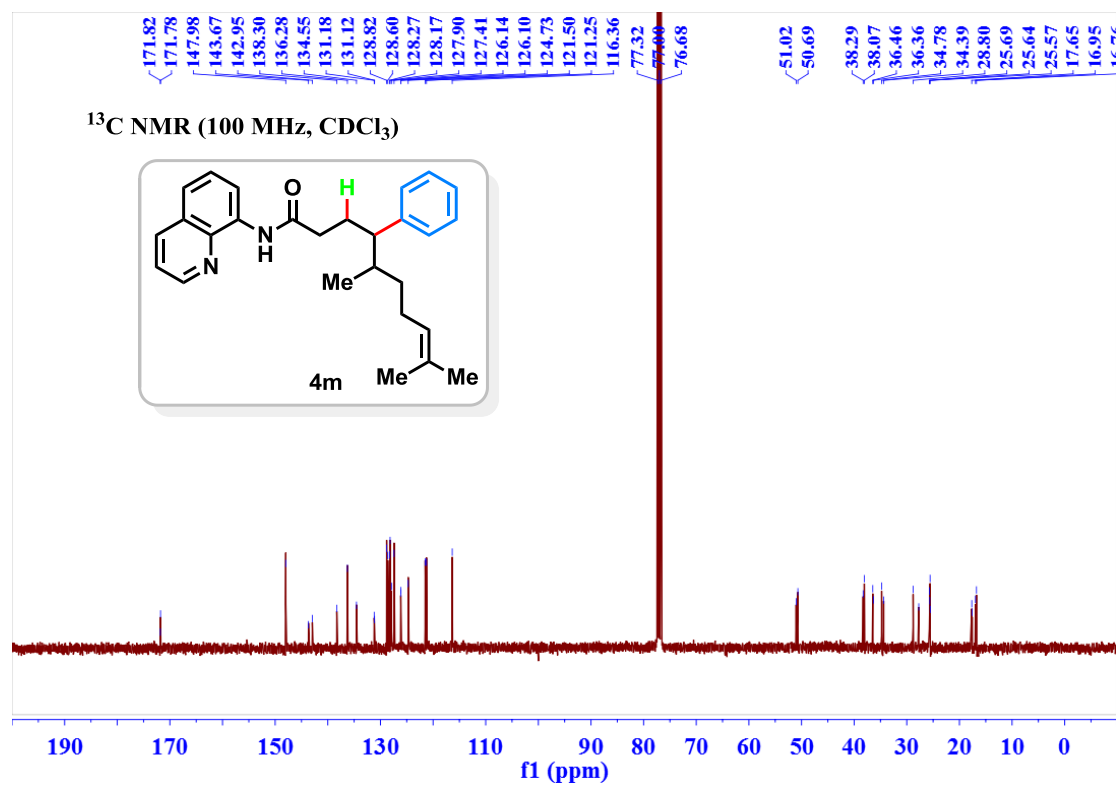

**4-phenyl-N-(quinolin-8-yl)nonanamide (4n)**

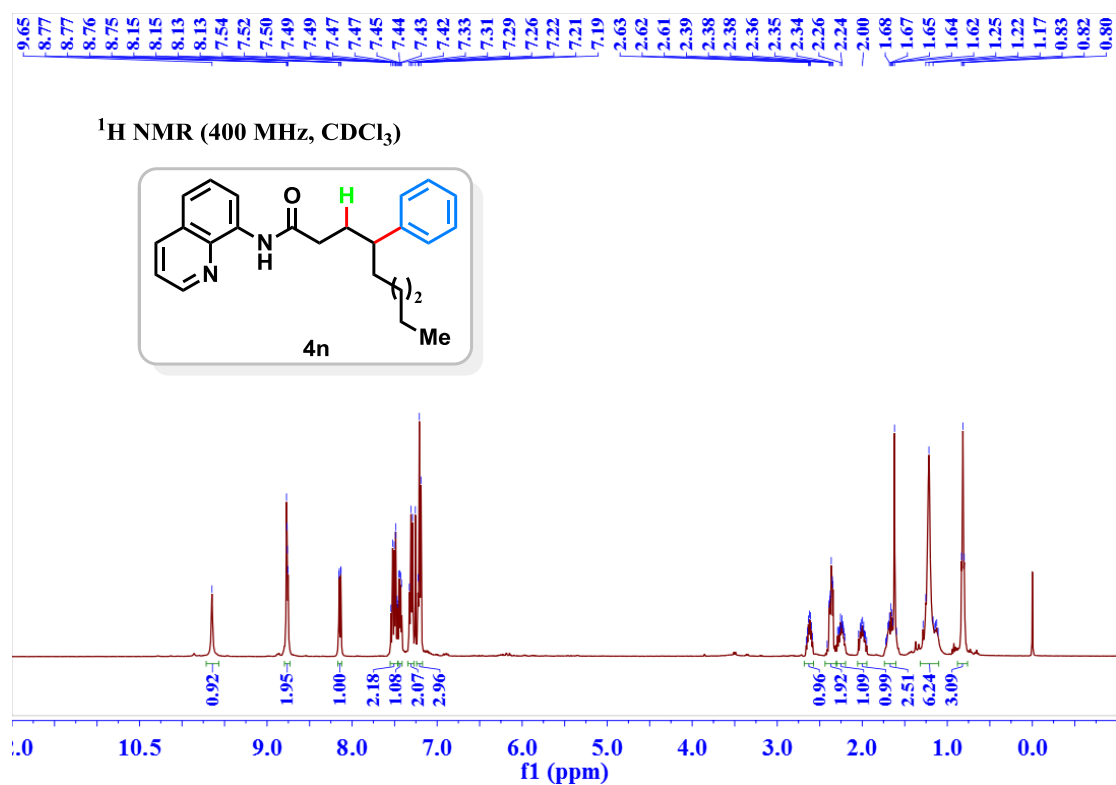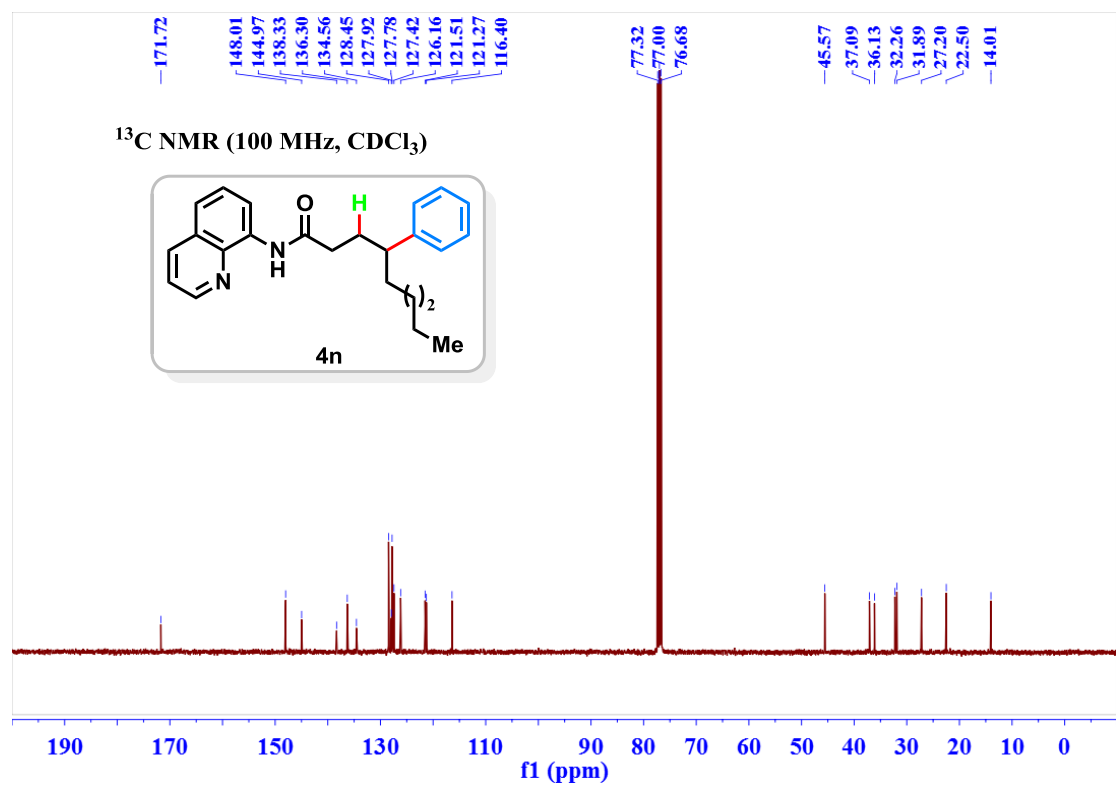

**4-phenyl-N-(quinolin-8-yl)decanamide (4o)**

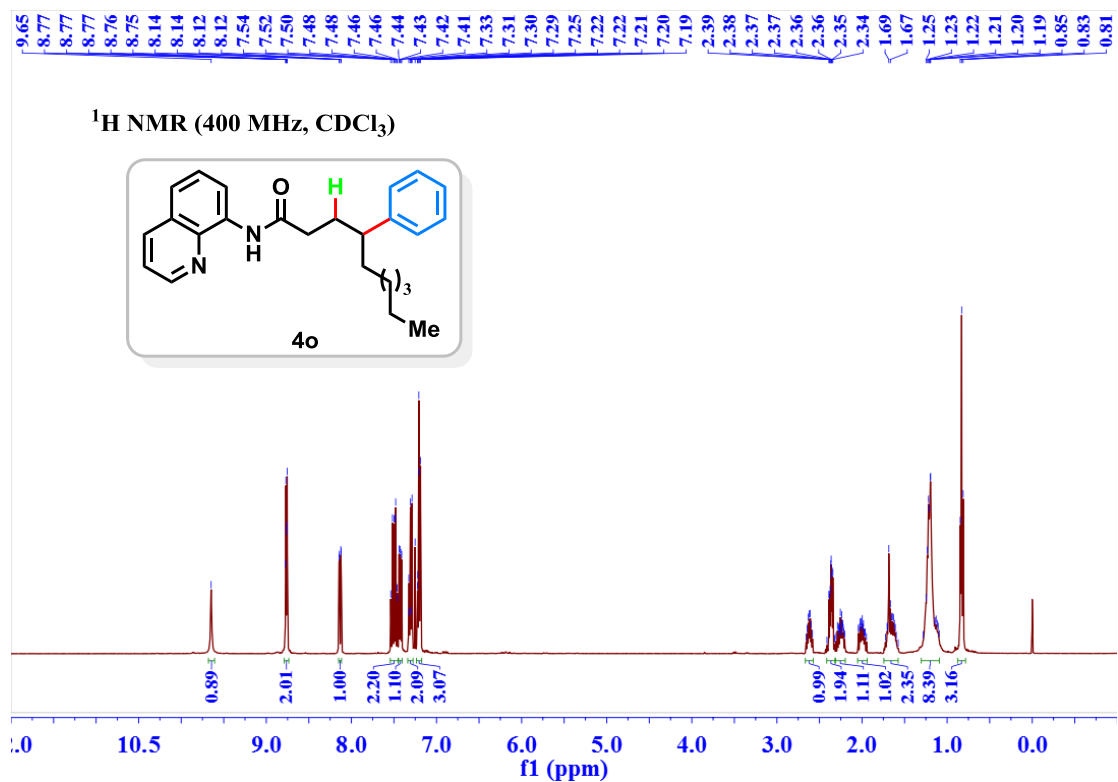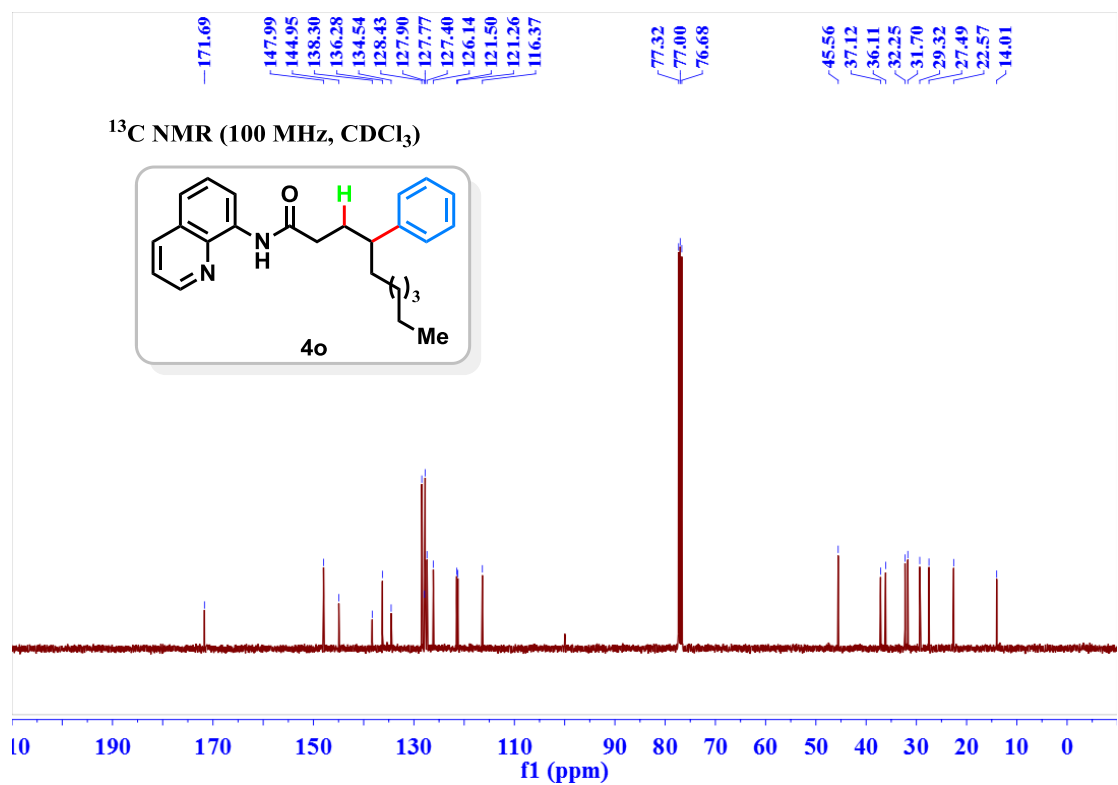

# 4-phenyl-*N*-(quinolin-8-yl)dodecanamide (4p)

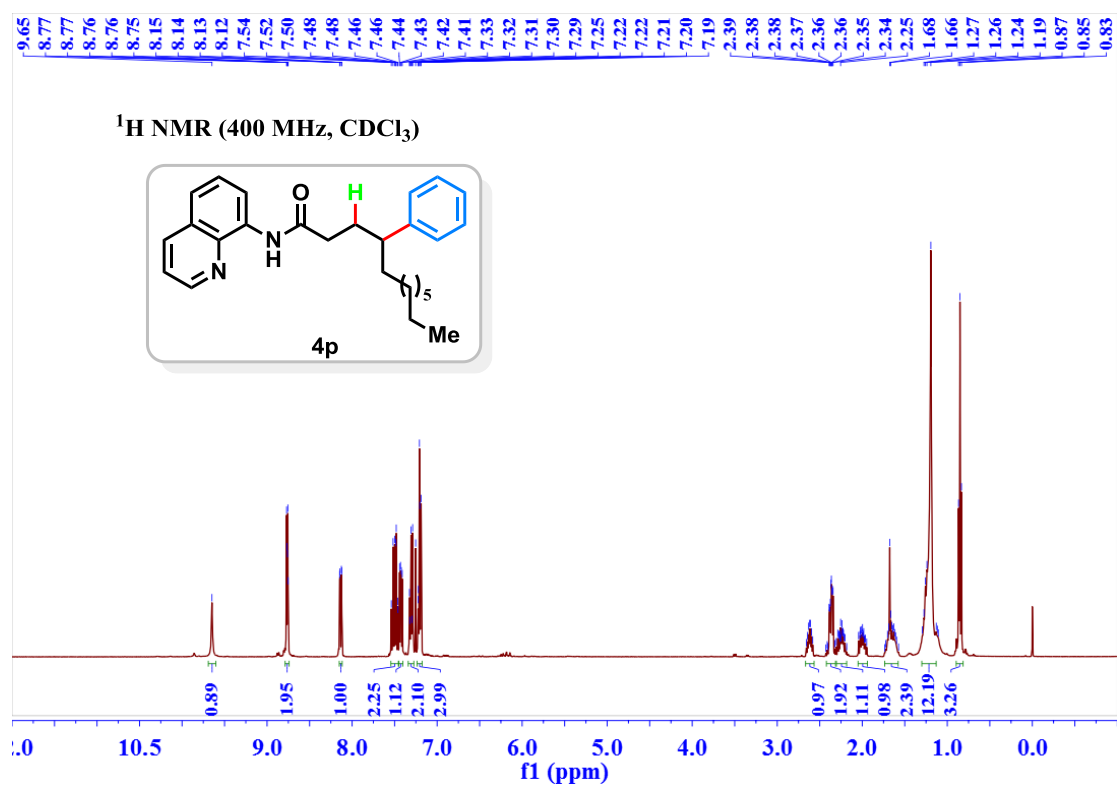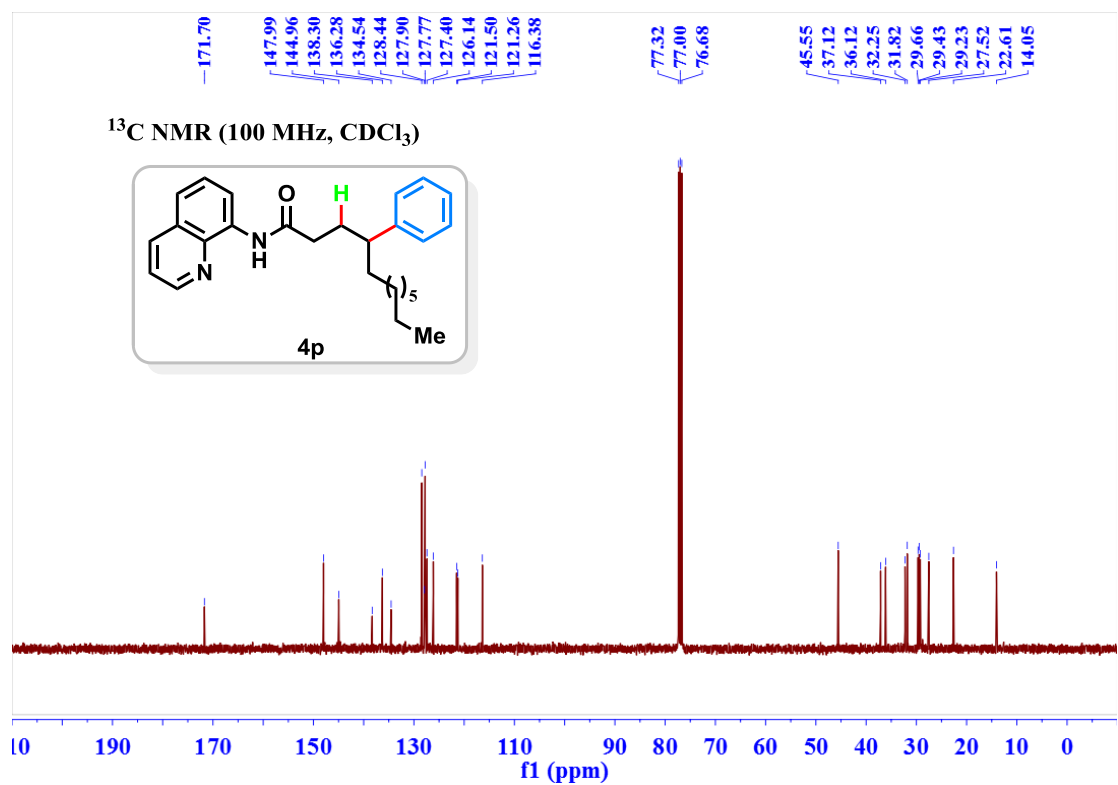

**4-phenyl-N-(quinolin-8-yl)tetradecanamide (4q)**

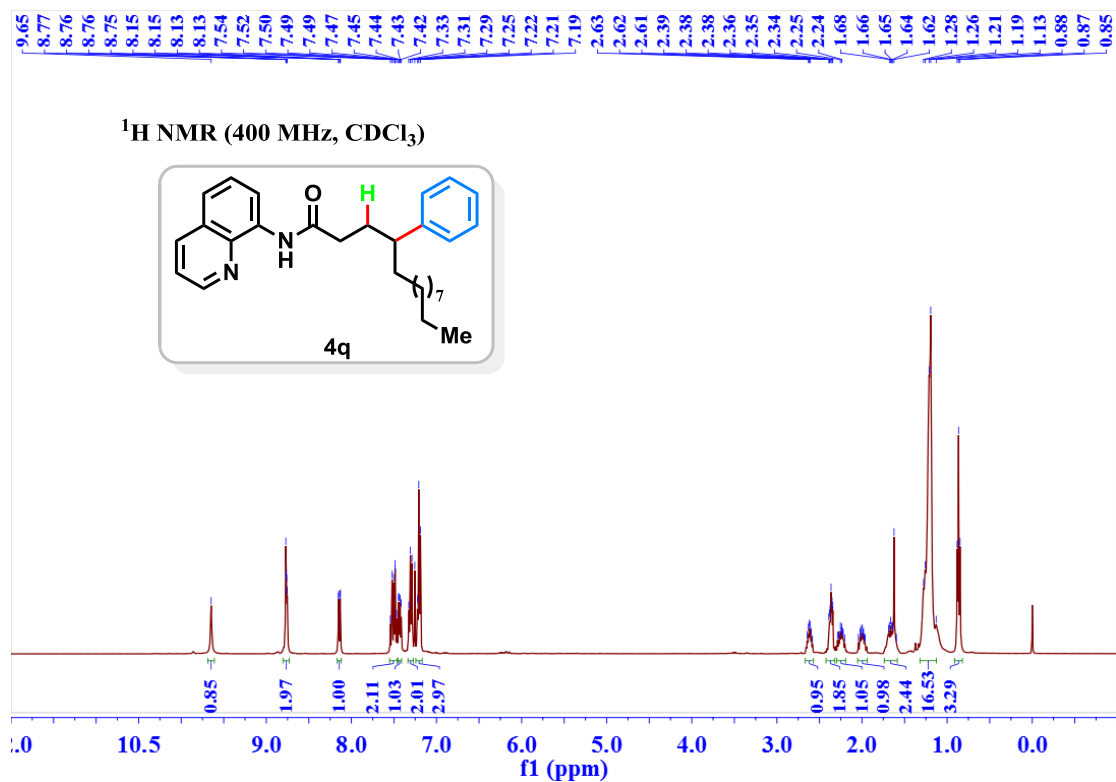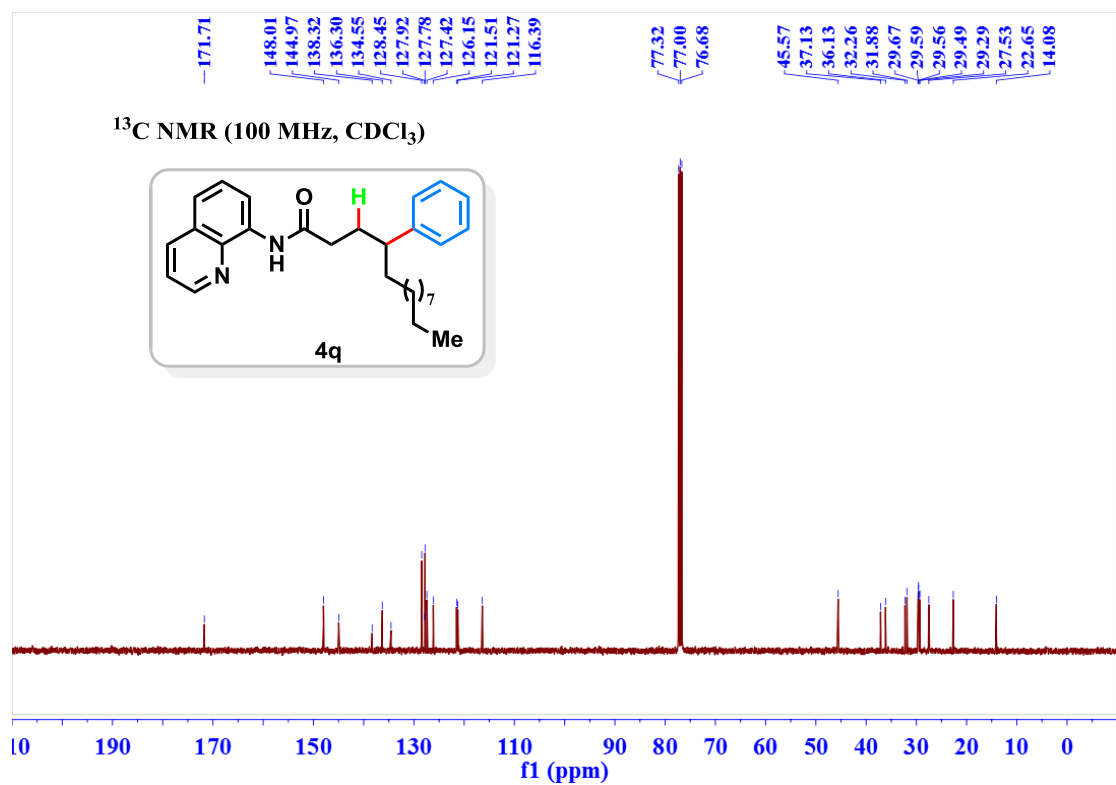

**4,4-diphenyl-*N*-(quinolin-8-yl)butanamide (4r)**

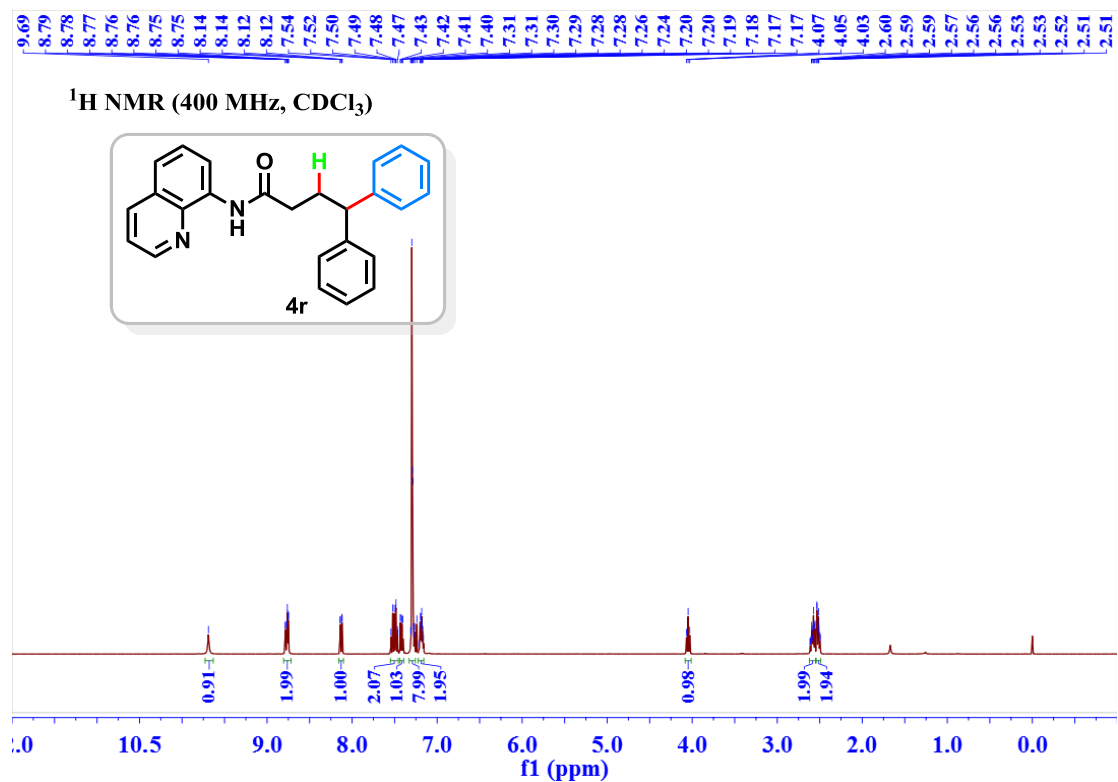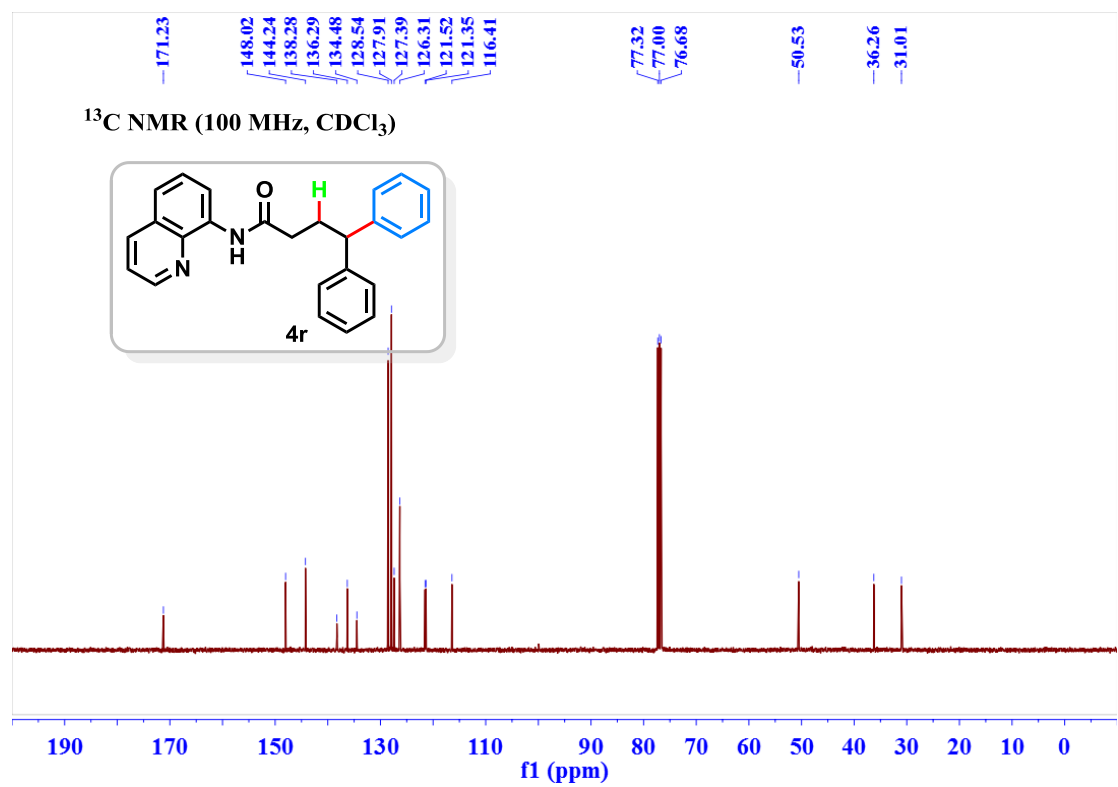

**4-(4-(*tert*-butyl)phenyl)-4-phenyl-N-(quinolin-8-yl)butanamide (4s)**

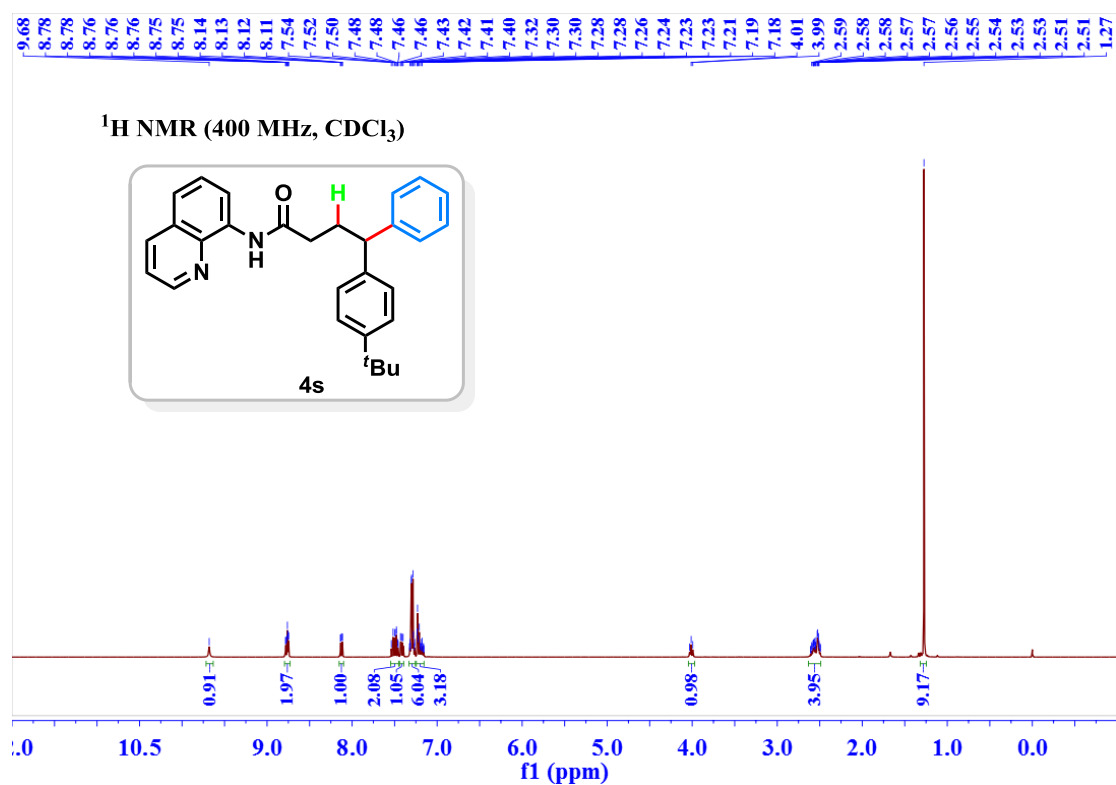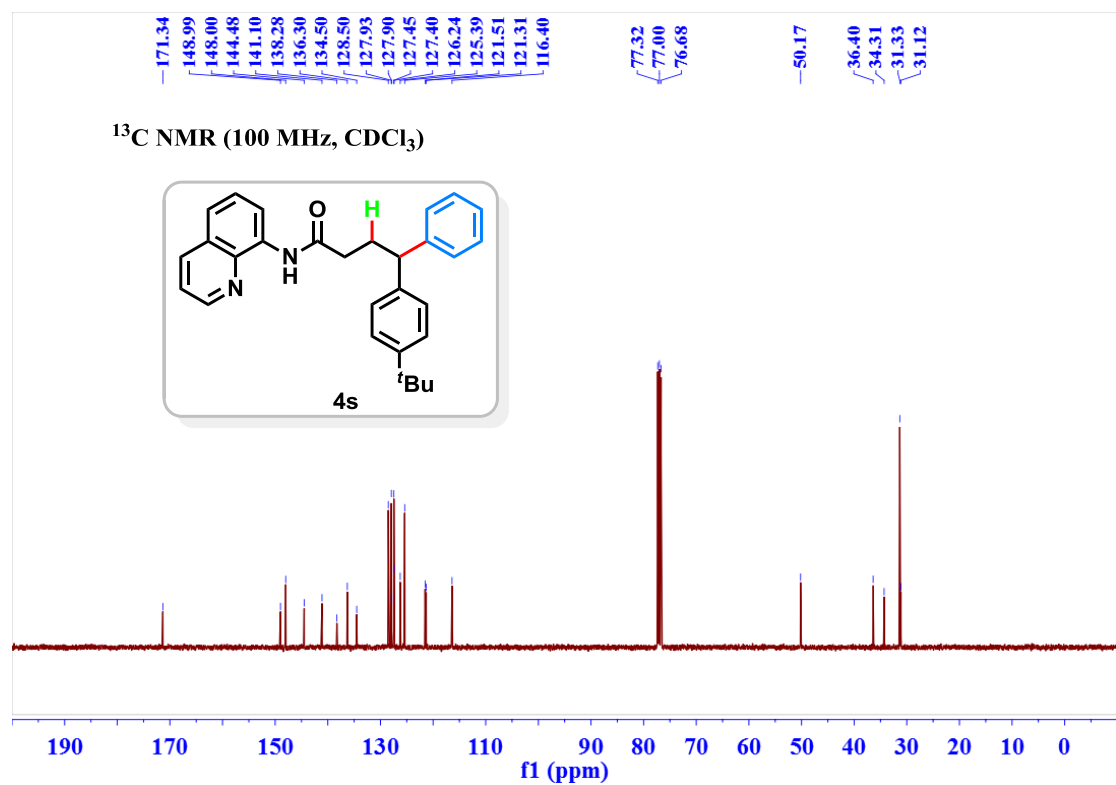



**4-(naphthalen-2-yl)-4-phenyl-N-(quinolin-8-yl)butanamide (4t)**

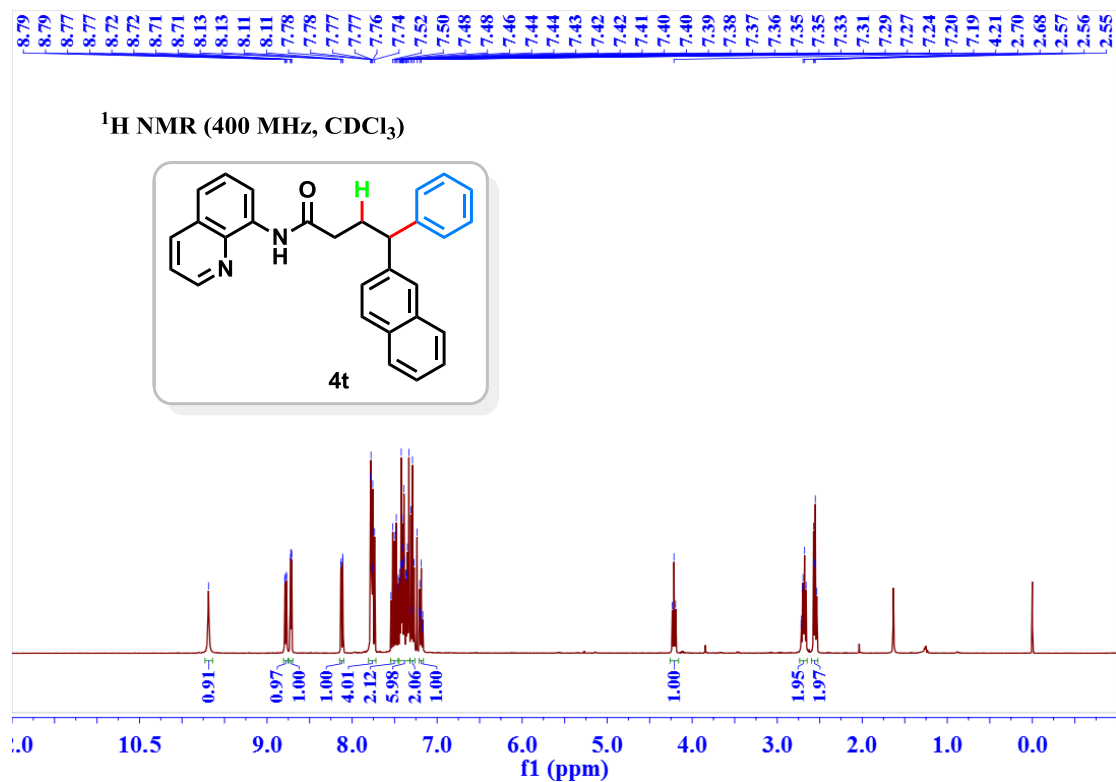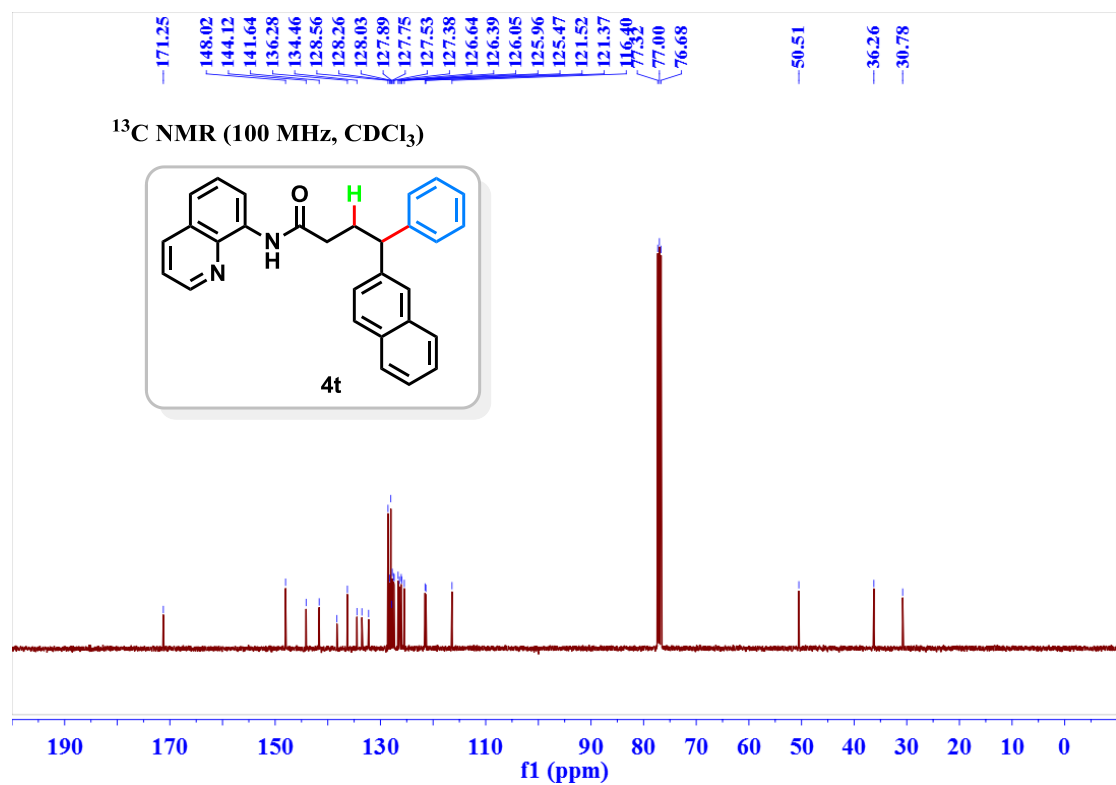

# 4-(*p*-tolyl)butanoic acid (5a)

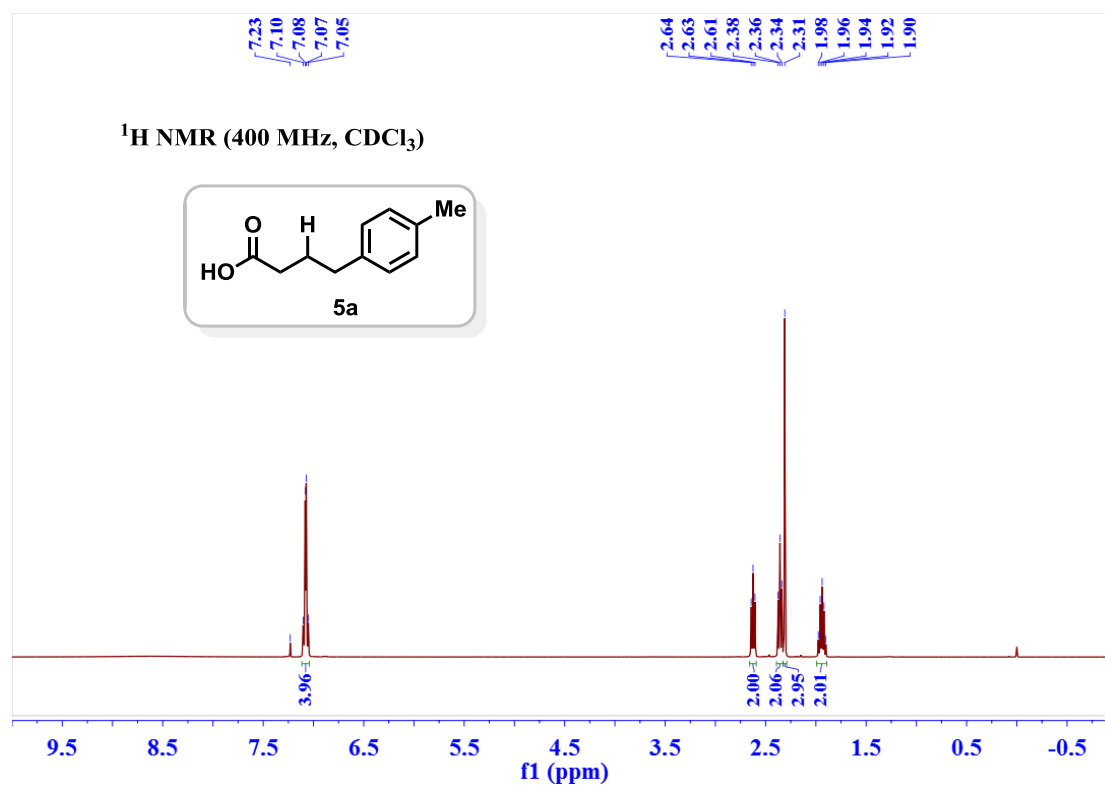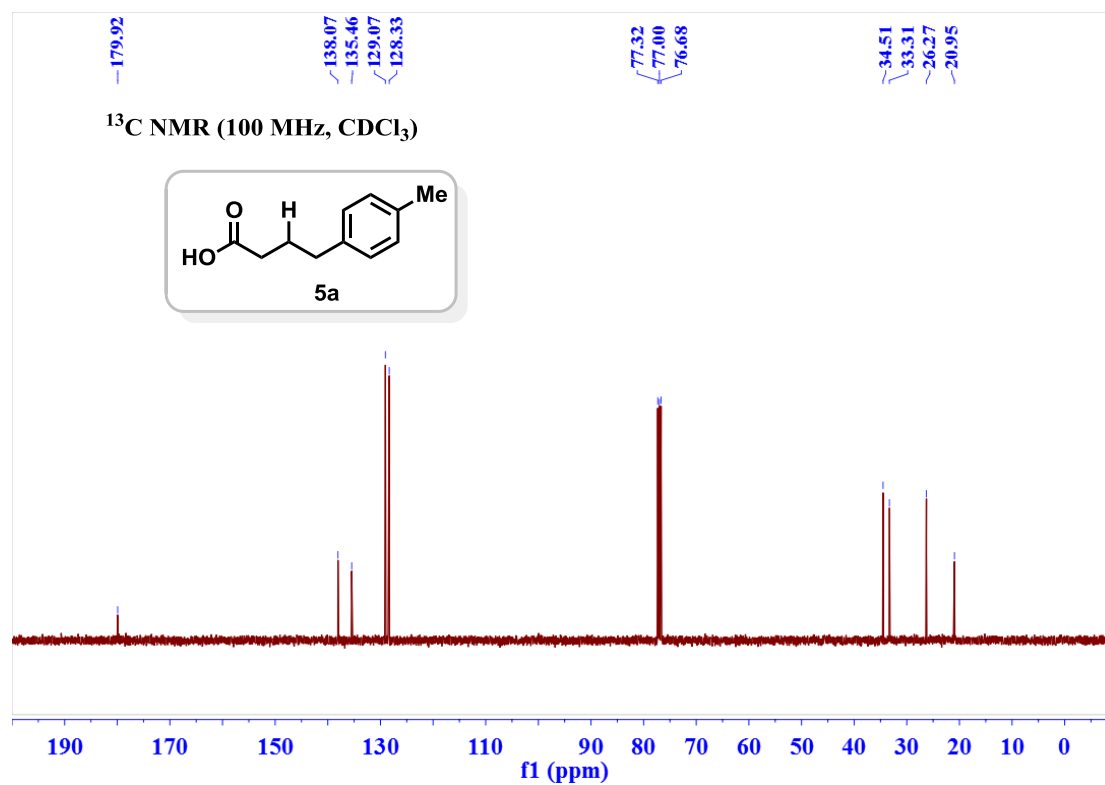

ethyl 4-(naphthalen-2-yl)butanoate (5b)

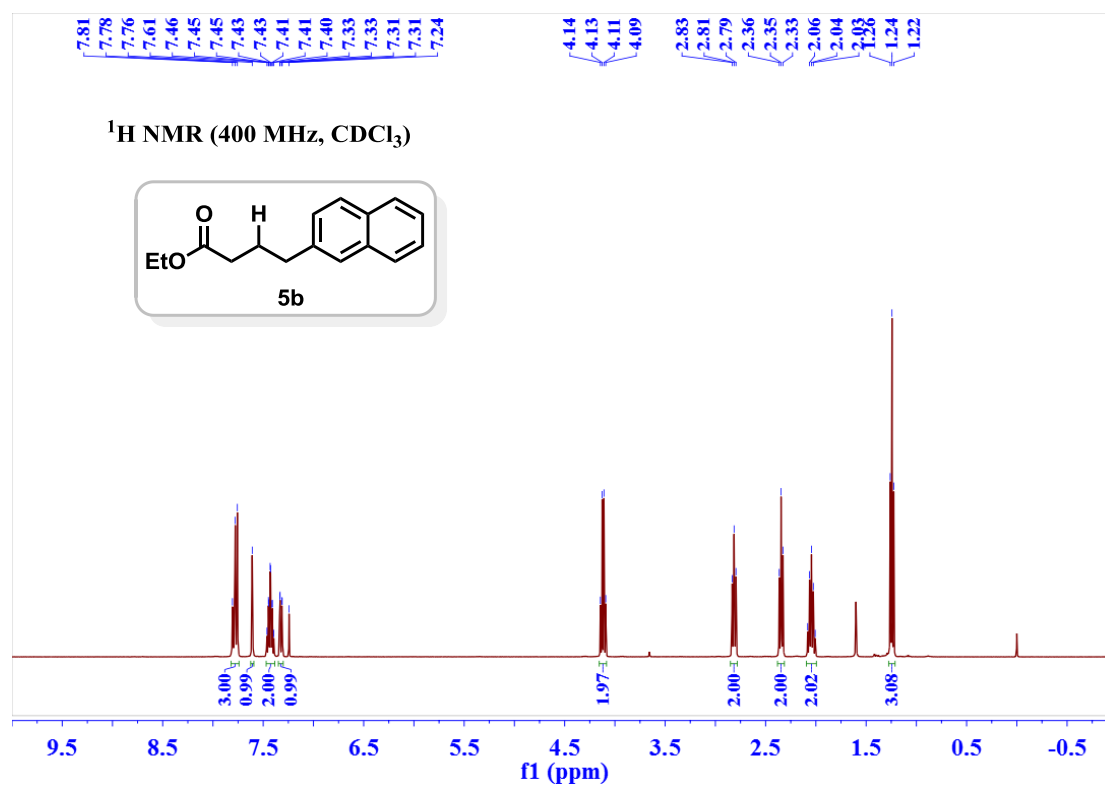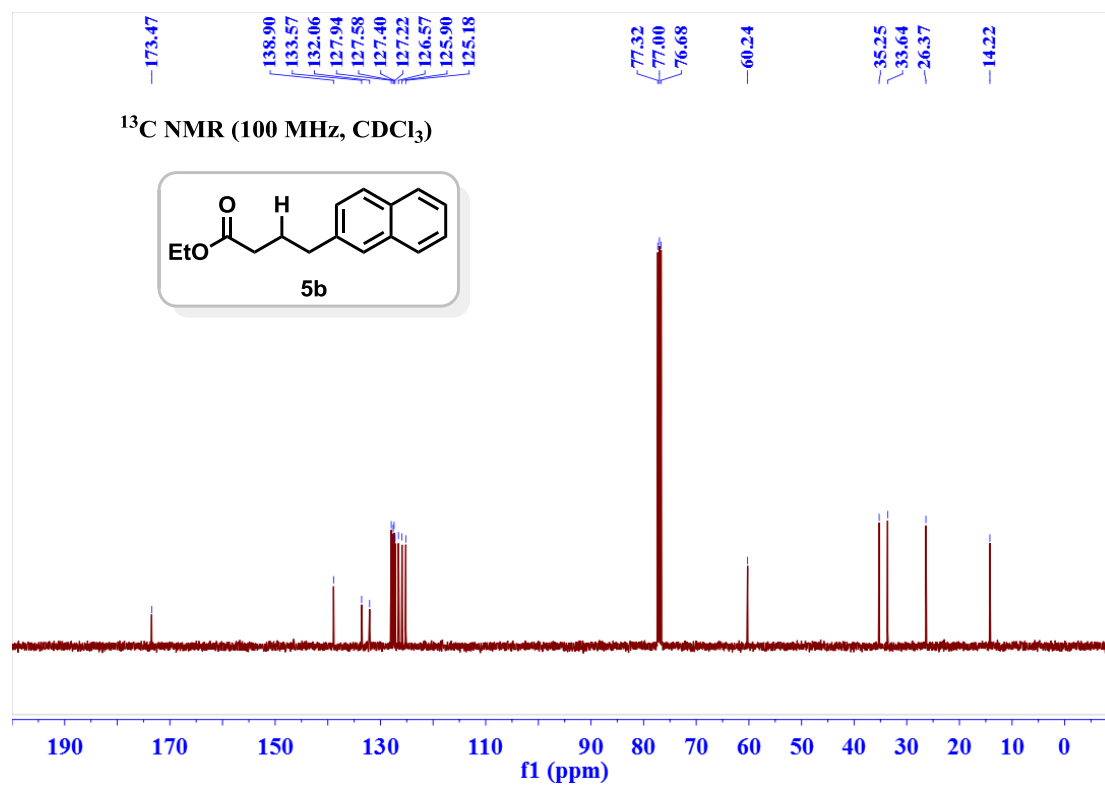

**methyl 4-(naphthalen-1-yl)butanoate (5c)**

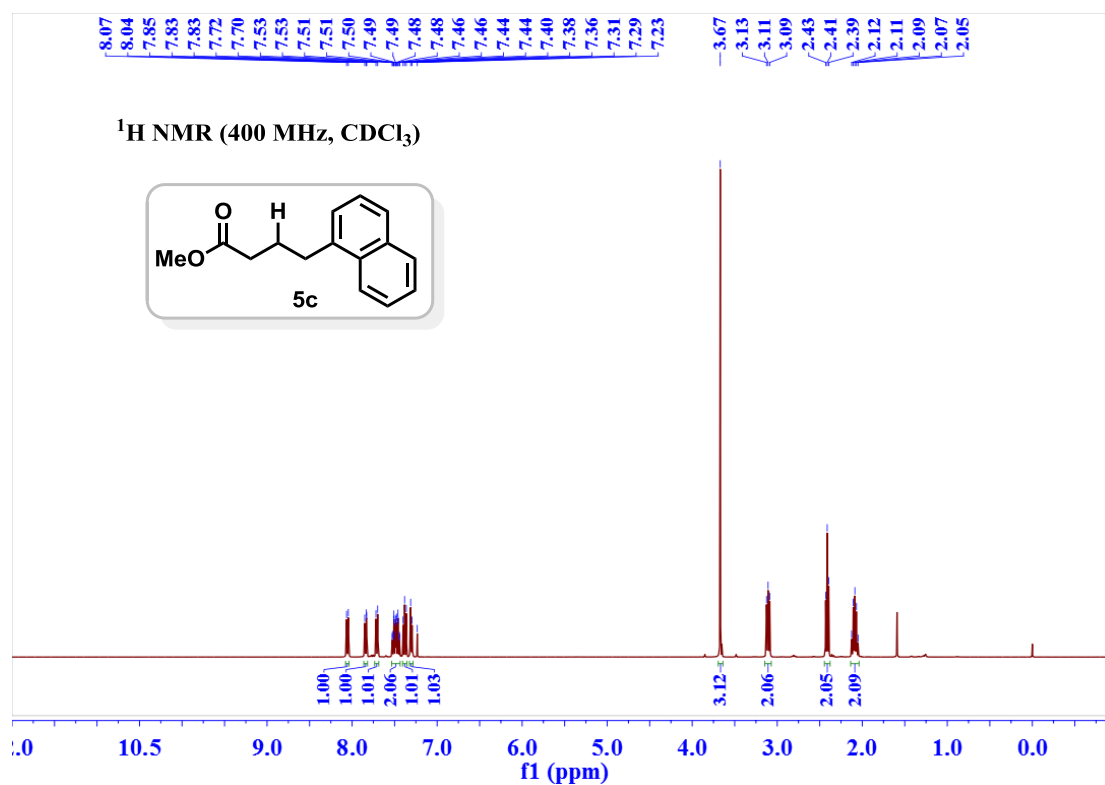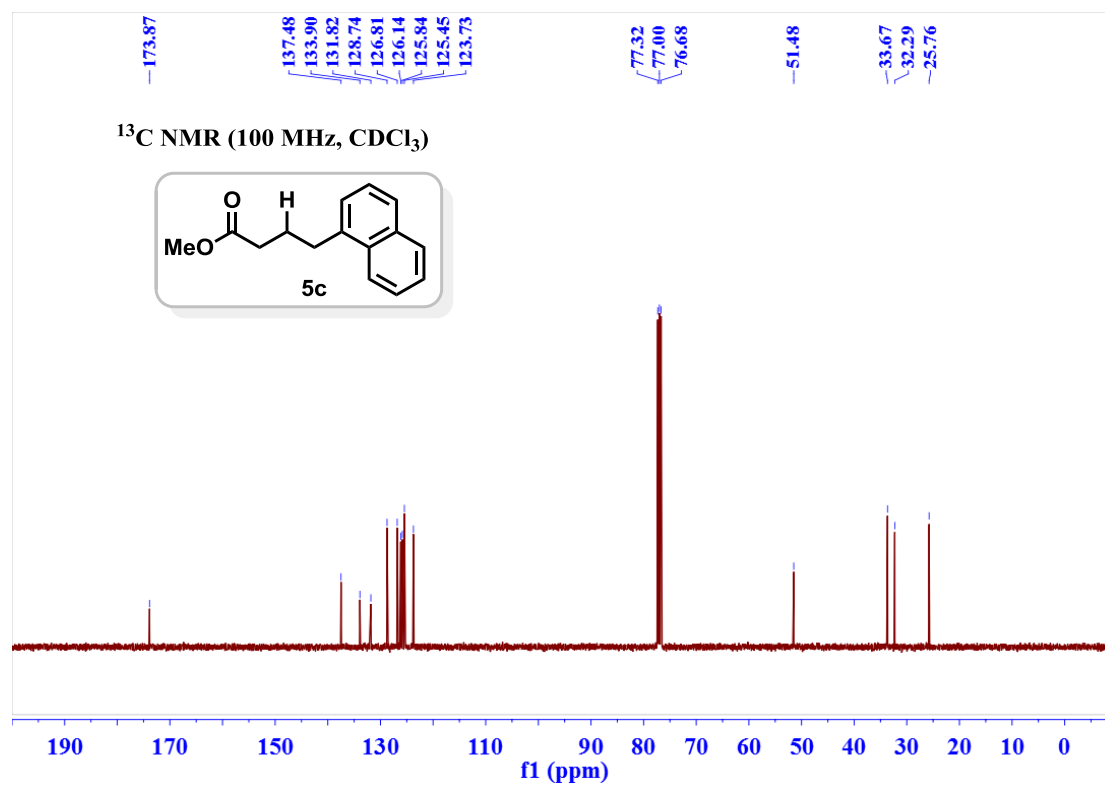

Supplement: Supplementary file 1 [file 25400378]
